# Supplementary material for: Gi-Coupled GPCR Signaling Controls the Formation and Organization of Human Pluripotent Colonies
Source: PLoS One. 2009 Nov 10;4(11):e7780. doi: 10.1371/journal.pone.0007780 (PMC2777408; doi:10.1371/journal.pone.0007780)
Supplement: Dataset S1 — Excel worksheet of microarray analyses. (0.17 MB XLS) [file pone.0007780.s003.xls]

## Sheet: supplemental_dataset
Symbol-short	Description	Probeset	EntrezGene	Ensembl	hES/iPS_p-value	Max-exp_all_tissues	hES/iPS-avg	lowest_non_hES/iPS_avg	hES/iPS_vs_lowest_fold	hES/iPS_vs_lowest_log2_fold	GPCR-coupling
ADCYAP1R1	adenylate cyclase activating polypeptide 1 (pituitary) receptor type I	207151_at	117	ENSG00000078549	0.297365	5.65	4.79245	4.8734	-1.05771	-0.0809455	Gs
ADMR	adrenomedullin receptor	1552440_at	11318	ENSG00000166856	0.251135	5.32333	3.48891	3.5373	-1.03411	-0.0483909	Gs
ADORA1	adenosine A1 receptor	205481_at	134	ENSG00000163485	0.0749363	8.38	4.90245	4.6612	1.18202	0.241255
ADORA2A	adenosine A2a receptor	205013_s_at	135	ENSG00000128271	6.22612e-06	10.0625	5.57345	4.8827	1.61413	0.690755	Gs
ADORA2B	adenosine A2b receptor	205891_at	136	ENSG00000170425	8.93526e-11	7.605	6.07909	4.0233	4.15772	2.05579	Gs
ADORA3	adenosine A3 receptor	206171_at	140	ENSG00000121933	8.40355e-06	7.24	4.30591	5.1865	-1.84113	-0.880591	Gi
ADRA1A	adrenergic, alpha-1A-, receptor	211490_at	148	---	7.8483e-06	4.47	3.79618	3.2191	1.49183	0.577082
ADRA1B	adrenergic, alpha-1B-, receptor	207589_at	147	ENSG00000170214	4.66976e-06	4.195	3.69045	3.2368	1.36951	0.453655	Gq
ADRA1D	adrenergic, alpha-1D-, receptor	210960_at	146	ENSG00000171873	0.46514	4.76	3.72336	3.6586	1.04591	0.0647636
ADRA2A	adrenergic, alpha-2A-, receptor /// adrenergic, alpha-2A-, receptor	209869_at	150	ENSG00000150594	5.3706e-05	8.37333	5.64209	4.1484	2.81609	1.49369	Gi
ADRA2B	adrenergic, alpha-2B-, receptor	208544_at	151	ENSG00000181210	0.481051	6.66	5.357	5.4722	-1.08313	-0.1152
ADRA2C	adrenergic, alpha-2C-, receptor	206128_at	152	ENSG00000184160	2.18072e-06	7.66	5.59955	5.1406	1.37454	0.458945	Gi
ADRB1	adrenergic, beta-1-, receptor	208214_at	153	ENSG00000043591	0.0187383	5.33	3.37164	3.186	1.13732	0.185636	Gs
ADRB2	adrenergic, beta-2-, receptor, surface	206170_at	154	ENSG00000169252	0.43175	8.11333	4.62155	4.5187	1.07389	0.102845
ADRB3	adrenergic, beta-3-, receptor	217303_s_at	155	ENSG00000188778	3.33477e-06	5.245	4.36955	4.1096	1.19743	0.259945	Gs
AGTR1	angiotensin II receptor, type 1	205357_s_at	185	ENSG00000144891	0.101892	9.56	3.79845	3.6743	1.08987	0.124155
AGTR2	angiotensin II receptor, type 2	207293_s_at	186	ENSG00000180772	0.654263	4.16667	3.43027	3.3993	1.0217	0.0309727
AGTRL1	angiotensin II receptor-like 1	213592_at	187	---	0.282632	9.86	4.95727	5.358	-1.32017	-0.400727	Gi
AVPR1A	arginine vasopressin receptor 1A	206250_x_at	552	ENSG00000166148	3.35565e-08	6.14	5.33982	4.8198	1.43397	0.520018	Gq
AVPR1B	arginine vasopressin receptor 1B	208260_at	553	ENSG00000198049	0.701697	7.23	6.19409	6.165	1.02037	0.0290909	Gq
AVPR2	arginine vasopressin receptor 2 (nephrogenic diabetes insipidus)	208108_s_at	554	ENSG00000126895	0.00119936	5.64	4.75973	4.4178	1.26745	0.341927	Gs
BAI1	brain-specific angiogenesis inhibitor 1	206083_at	575	ENSG00000181790	0.320575	6.575	5.32709	5.2397	1.06245	0.0873909
BAI2	brain-specific angiogenesis inhibitor 2	204966_at	576	ENSG00000121753	0.000357053	7.63667	4.84118	4.0457	1.73566	0.795482
BAI3	Brain-specific angiogenesis inhibitor 3	234692_at	577	---	0.0397497	3.1	2.75664	2.6892	1.04785	0.0674364
BDKRB1	bradykinin receptor B1	207510_at	623	ENSG00000100739	0.0159087	8.92	5.15973	5.3958	-1.17778	-0.236073
BDKRB2	bradykinin receptor B2	205870_at	624	ENSG00000168398	0.223284	8.25	5.68391	5.3968	1.22019	0.287109
BLR1	Burkitt lymphoma receptor 1, GTP binding protein (chemokine (C-X-C motif) receptor 5)	206126_at	643	ENSG00000160683	0.142819	7.28	4.10318	4.1723	-1.04908	-0.0691182
BRS3	bombesin-like receptor 3	1552818_a_at	680	ENSG00000102239	0.808901	4.1	2.97427	2.9876	-1.00928	-0.0133273	vision,Gq
C11orf36	chromosome 11 open reading frame 36	1564439_a_at	283303	---	0.0149761	6.91	5.59727	5.8271	-1.17269	-0.229827	orphan
C1S	complement component 1, s subcomponent	1555229_a_at	716	ENSG00000182326	1.53548e-07	10.35	4.98273	3.4365	2.92052	1.54623
C20orf12	chromosome 20 open reading frame 12	219951_s_at	55184	ENSG00000089091	9.22669e-07	6.88	5.74473	4.1535	3.01306	1.59123
C3AR1	complement component 3a receptor 1	209906_at	719	ENSG00000171860	0.00168377	7.73667	4.60345	4.9625	-1.28258	-0.359045
C5AR1	complement component 5a receptor 1	220088_at	728	ENSG00000197405	0.639767	8.77667	3.37755	3.4031	-1.01787	-0.0255545
C7orf9	chromosome 7 open reading frame 9	221322_at	64111	ENSG00000105954	0.0269907	4.03	3.15882	3.0468	1.08074	0.112018
CALCR	calcitonin receptor	207886_s_at	799	ENSG00000004948	3.66313e-07	5.475	4.65709	2.99	3.17574	1.66709	Gs
CALCRL	calcitonin receptor-like	206331_at	10203	ENSG00000064989	0.483901	8.96	4.75427	4.646	1.07794	0.108273	Gs
CASR	calcium-sensing receptor (hypocalciuric hypercalcemia 1, severe neonatal hyperparathyroidism)	242744_s_at	846	ENSG00000036828	0.78858	3.73	2.95955	2.9767	-1.01196	-0.0171545	Gq
CCBP2	Chemokine binding protein 2	1559432_at	1238	---	0.879503	5.95	4.00018	4.0116	-1.00795	-0.0114182
CCKAR	cholecystokinin A receptor	211174_s_at	886	ENSG00000163394	0.000253926	5.59333	4.59336	4.1496	1.36015	0.443764	Gq
CCKBR	cholecystokinin B receptor	210381_s_at	887	ENSG00000110148	3.0839e-07	6.85333	5.76955	4.096	3.18998	1.67355
CCR1	chemokine (C-C motif) receptor 1	205098_at	1230	ENSG00000163823	0.00108605	6.70667	3.73936	4.1571	-1.33583	-0.417736
CCR10	chemokine (C-C motif) receptor 10	220565_at	2826	ENSG00000184451	0.0132159	6.45	3.93336	4.2053	-1.20743	-0.271936	Gq
CCR2	chemokine (C-C motif) receptor 2 /// chemokine (C-C motif) receptor 2	206978_at	1231	ENSG00000121807	0.716453	6.13667	3.65391	3.6268	1.01897	0.0271091	Gq
CCR2	chemokine (C-C motif) receptor 2 /// chemokine (C-C motif) receptor 2 /// similar to C-C chemokine receptor type 2 (C-C CKR-2) (CC-CKR-2) (CCR-2) (CCR2) (Monocyte chemoattractant protein 1 receptor) (MCP-1-R) /// similar to C-C chemokine receptor type 2 (	207794_at	1231 /// 653518	---	0.0355143	4.27	3.29936	3.4377	-1.10064	-0.138336	Gq
CCR3	chemokine (C-C motif) receptor 3	208304_at	1232	ENSG00000183625	0.173731	5.48333	3.75664	3.8583	-1.07301	-0.101664	Gq
CCR4	chemokine (C-C motif) receptor 4	208376_at	1233	ENSG00000183813	0.080771	5.56333	4.21973	4.4164	-1.14605	-0.196673	Gq,Gi
CCR5	chemokine (C-C motif) receptor 5 /// similar to C-C chemokine receptor type 5 (C-C CKR-5) (CC-CKR-5) (CCR-5) (CCR5) (HIV-1 fusion coreceptor) (CHEMR13) (CD195 antigen)	206991_s_at	1234 /// 653725	ENSG00000160791	0.218614	8.54667	6.62573	6.7776	-1.11101	-0.151873	Gq
CCR6	chemokine (C-C motif) receptor 6	206983_at	1235	ENSG00000112486	0.0175053	6.37333	2.76	2.9865	-1.16999	-0.2265	Gq
CCR7	chemokine (C-C motif) receptor 7 /// chemokine (C-C motif) receptor 7	206337_at	1236	ENSG00000126353	0.599356	8.60333	3.36909	3.4011	-1.02243	-0.0320091
CCR8	chemokine (C-C motif) receptor 8	208059_at	1237	---	0.0204453	5.81	4.95155	4.8029	1.10853	0.148645
CCR9	chemokine (C-C motif) receptor 9	207445_s_at	10803	ENSG00000173585	0.708956	9.73	3.43909	3.4611	-1.01537	-0.0220091	Gq
CCRL1	chemokine (C-C motif) receptor-like 1	220351_at	51554	ENSG00000129048	0.584496	9.365	2.84927	2.8841	-1.02443	-0.0348273
CCRL2	chemokine (C-C motif) receptor-like 2 /// similar to chemokine (C-C motif) receptor-like 2	211434_s_at	642312 /// 9034	ENSG00000121797	0.241606	6.07	4.01018	4.0844	-1.05279	-0.0742182
CD97	CD97 molecule	202910_s_at	976	ENSG00000123146	0.00236364	9.66333	5.48745	5.0303	1.37283	0.457155
CELSR1	cadherin, EGF LAG seven-pass G-type receptor 1 (flamingo homolog, Drosophila)	217262_s_at	9620	ENSG00000075275	3.76562e-07	4.46333	3.63773	2.9546	1.60562	0.683127
CELSR2	cadherin, EGF LAG seven-pass G-type receptor 2 (flamingo homolog, Drosophila)	204029_at	1952	ENSG00000143126	1.17453e-05	9.1	6.49164	5.4744	2.02404	1.01724
CELSR3	cadherin, EGF LAG seven-pass G-type receptor 3 (flamingo homolog, Drosophila)	205165_at	1951	ENSG00000008300	4.69213e-07	8.01	6.24927	4.7604	2.8067	1.48887
CHML	choroideremia-like (Rab escort protein 2)	1565951_s_at	1122	ENSG00000203668	2.64899e-13	6.54	6.06573	2.4556	12.2112	3.61013
CHRM1	cholinergic receptor, muscarinic 1	231783_at	1128	ENSG00000168539	0.00779838	6.74	3.15727	3.2565	-1.0712	-0.0992273
CHRM2	cholinergic receptor, muscarinic 2	221330_at	1129	ENSG00000181072	0.000277012	5.3	3.49064	3.7656	-1.20996	-0.274964
CHRM3	cholinergic receptor, muscarinic 3	1559633_a_at	1131	ENSG00000133019	1.05369e-06	5.81	4.00018	3.0454	1.93829	0.954782
CHRM4	cholinergic receptor, muscarinic 4	221357_at	1132	ENSG00000180720	0.000675616	5.93667	5.19164	4.8048	1.30752	0.386836
CHRM5	cholinergic receptor, muscarinic 5	221347_at	1133	ENSG00000184984	3.16432e-05	5.42	3.35982	3.9898	-1.54755	-0.629982
CMKLR1	chemokine-like receptor 1	207652_s_at	1240	ENSG00000174600	0.00184469	5.3	3.90045	4.0902	-1.14056	-0.189745	orphan
CMKOR1	Chemokine orphan receptor 1	1559114_a_at	57007	---	0.0271855	4.96	4.31664	4.1326	1.13606	0.184036
CNR1	cannabinoid receptor 1 (brain)	213436_at	1268	ENSG00000118432	9.54093e-05	9.04	4.382	2.9441	2.70926	1.4379	Gi
CNR2	cannabinoid receptor 2 (macrophage)	206586_at	1269	ENSG00000188822	0.0120377	6.53333	4.84727	5.1062	-1.19659	-0.258927	Gi
CRHR1	corticotropin releasing hormone receptor 1	211897_s_at	1394	ENSG00000120088	2.21086e-06	5.26	4.54836	3.6924	1.80997	0.855964	Gs
CRHR2	corticotropin releasing hormone receptor 2	207897_at	1395	---	0.000194234	5.165	4.50955	4.1306	1.30039	0.378945	Gs
CX3CR1	chemokine (C-X3-C motif) receptor 1	1568934_at	1524	---	0.14851	7.45667	4.142	4.0226	1.08628	0.1194
CXCR3	chemokine (C-X-C motif) receptor 3	207681_at	2833	ENSG00000186810	2.45365e-06	5.23667	3.908	4.2514	-1.26874	-0.3434
CXCR4	chemokine (C-X-C motif) receptor 4	209201_x_at	7852	ENSG00000121966	0.00805143	11.2467	6.08836	5.3064	1.71947	0.781964	Gi
CXCR6	chemokine (C-X-C motif) receptor 6	206974_at	10663	ENSG00000172215	0.0319836	5.22	3.68618	3.9192	-1.17529	-0.233018
CYSLTR1	cysteinyl leukotriene receptor 1	216288_at	10800	---	0.000275121	3.93667	2.71	2.8624	-1.11142	-0.1524	Gq
CYSLTR2	cysteinyl leukotriene receptor 2	220813_at	57105	ENSG00000152207	0.000436802	5.55667	4.37109	4.596	-1.1687	-0.224909	Gq
DARC	Duffy blood group, chemokine receptor	208335_s_at	2532	ENSG00000162706	0.00259226	10.47	5.088	5.4591	-1.29334	-0.3711
DKFZP434P211	POM121-like protein /// similar to nuclear pore membrane protein 121	1553817_at	29774 /// 646074	ENSG00000167390 /// ENSG00000182356 /// ENSG00000189258 /// ENSG00000184978 /// ENSG00000183169 /// ENSG00000128262 /// ENSG00000185016	0.000239401	4.09	3.28136	2.8656	1.334	0.415764
DNAJC8	DnaJ (Hsp40) homolog, subfamily C, member 8	205545_x_at	22826	ENSG00000126698	2.9976e-15	9.5	9.16973	7.6581	2.85131	1.51163	Gq
DNMT1	DNA (cytosine-5-)-methyltransferase 1	227684_at	1786	---	0.00241169	7.14	6.16273	5.9049	1.19568	0.257827
DRD1	dopamine receptor D1	214652_at	1812	ENSG00000184845	0.393751	7.04333	3.19155	3.232	-1.02844	-0.0404545
DRD2	dopamine receptor D2 /// dopamine receptor D2	211624_s_at	1813	ENSG00000149295	5.8505e-08	6.55	5.59064	5.1152	1.39034	0.475436
DRD3	dopamine receptor D3	214559_at	1814	ENSG00000151577	1.32358e-06	4.07	3.59336	3.3312	1.19928	0.262164	Gi
DRD4	dopamine receptor D4	208215_x_at	1815	ENSG00000069696	1.26761e-06	5.57	4.87091	3.8113	2.08437	1.05961	Gi
DRD5	dopamine receptor D5	208486_at	1816	ENSG00000169676	0.473838	5.90333	4.26982	4.3147	-1.0316	-0.0448818	Gs
EBI2	Epstein-Barr virus induced gene 2 (lymphocyte-specific G protein-coupled receptor)	205419_at	1880	ENSG00000169508	0.942978	6.46	3.13745	3.1288	1.00602	0.00865455
EDG1	endothelial differentiation, sphingolipid G-protein-coupled receptor, 1	204642_at	1901	ENSG00000170989	0.58753	9.19	5.50845	5.5901	-1.05822	-0.0816455
EDG2	endothelial differentiation, lysophosphatidic acid G-protein-coupled receptor, 2	204036_at	1902	ENSG00000198121	0.00472139	11.12	6.22573	5.1891	2.05143	1.03663	Go,Gq,G13,G12,Gi
EDG2	endothelial differentiation, lysophosphatidic acid G-protein-coupled receptor, 2 /// hypothetical protein LOC644923	204037_at	1902 /// 644923	ENSG00000198121	0.297458	10.62	5.69227	5.4252	1.20336	0.267073	Go,Gq,G13,G12,Gi
EDG3	endothelial differentiation, sphingolipid G-protein-coupled receptor, 3	228176_at	1903	ENSG00000186354	3.13037e-05	9.31	6.87618	4.9741	3.73752	1.90208
EDG4	endothelial differentiation, lysophosphatidic acid G-protein-coupled receptor, 4	206722_s_at	9170	ENSG00000064547	1.95983e-08	6.83	6.30882	5.1176	2.28345	1.19122	Go,Gq,G13,G12,Gi
EDG5	endothelial differentiation, sphingolipid G-protein-coupled receptor, 5	208537_at	9294	ENSG00000175898	0.0105767	5.57	4.73745	4.4418	1.22744	0.295655
EDG6	endothelial differentiation, lysophosphatidic acid G-protein-coupled receptor, 6	206437_at	8698	ENSG00000125910	0.552545	8.17333	6.13473	6.1819	-1.03324	-0.0471727
EDG7	endothelial differentiation, lysophosphatidic acid G-protein-coupled receptor, 7	220816_at	23566	ENSG00000171517	9.32874e-11	6.53333	5.91709	4.6237	2.45103	1.29339	Go,Gq,Gi
EDG8	endothelial differentiation, sphingolipid G-protein-coupled receptor, 8	230464_at	53637	ENSG00000180739	3.69607e-08	8.17667	5.34864	4.4515	1.86237	0.897136	G12,Gi
EDNRA	endothelin receptor type A	204463_s_at	1909	ENSG00000151617	0.012131	9.24333	4.692	3.0467	3.12813	1.6453	Gq
EDNRB	endothelin receptor type B	204271_s_at	1910	ENSG00000136160	4.64628e-13	10.72	9.77118	5.0468	26.4351	4.72438
ELTD1	EGF, latrophilin and seven transmembrane domain containing 1	219134_at	64123	ENSG00000162618	0.0254988	9.475	5.15773	4.1282	2.04136	1.02953
EMR1	egf-like module containing, mucin-like, hormone receptor-like 1	207111_at	2015	---	0.555188	5.95667	4.58136	4.54	1.02909	0.0413636
EMR2	egf-like module containing, mucin-like, hormone receptor-like 2	207610_s_at	30817	ENSG00000127507	0.000131762	4.6	3.90209	3.2404	1.58194	0.661691
EMR3	egf-like module containing, mucin-like, hormone receptor-like 3	210724_at	84658	ENSG00000131355	0.571466	5.9	4.13891	4.1868	-1.03375	-0.0478909
EP300	E1A binding protein p300	213579_s_at	2033	ENSG00000100393	8.01096e-08	8.25333	7.34482	5.4081	3.82834	1.93672
F2R	coagulation factor II (thrombin) receptor	203989_x_at	2149	ENSG00000181104	2.43125e-08	9.54	6.52755	2.7394	13.8148	3.78815
F2RL1	coagulation factor II (thrombin) receptor-like 1	206429_at	2150	ENSG00000164251	5.11289e-09	9.05	7.87791	4.9339	7.69547	2.94401	Gq
F2RL2	coagulation factor II (thrombin) receptor-like 2	230147_at	2151	ENSG00000164220	0.00081635	9.84	5.07664	2.8965	4.53196	2.18014	Gq
FBXW2	F-box and WD-40 domain protein 2	209630_s_at	26190	---	4.4087e-13	8.72	8.50164	6.0408	5.50536	2.46084	orphan
FFAR1	Free fatty acid receptor 1	1561507_at	2864	---	0.00234719	3.53	3.13409	2.8924	1.18238	0.241691	Gq,Gi
FFAR2	free fatty acid receptor 2	221345_at	2867	ENSG00000126262	0.00156398	5.38	3.77118	3.455	1.24503	0.316182	Gq,Gi
FFAR3	free fatty acid receptor 3 /// G protein-coupled receptor 42 /// similar to Putative G-protein coupled receptor 41	221385_s_at	2865 /// 2866 /// 654110	ENSG00000185897 /// ENSG00000126251	6.40342e-05	5.78	5.13527	4.6813	1.36981	0.453973	Gq,Gi
FPR1	formyl peptide receptor 1 /// formyl peptide receptor 1	205118_at	2357	ENSG00000171051	0.115497	5.86667	3.99427	4.0644	-1.04981	-0.0701273	Gq
FPRL1	formyl peptide receptor-like 1 /// formyl peptide receptor-like 1	210772_at	2358	ENSG00000171049	0.0895733	5.20667	2.97636	2.9176	1.04157	0.0587636	Gq
FPRL2	formyl peptide receptor-like 2	214560_at	2359	ENSG00000187474	0.129367	5.49333	3.74427	3.8895	-1.1059	-0.145227	Gq
FSHR	follicle stimulating hormone receptor	211201_at	2492	ENSG00000170820	0.0934281	4.27	3.21427	3.318	-1.07455	-0.103727	Gs
FZD1	frizzled homolog 1 (Drosophila)	204451_at	8321	ENSG00000157240	0.0319861	8.96	5.52227	4.8428	1.60155	0.679473	Gq
FZD10	frizzled homolog 10 (Drosophila)	219764_at	11211	ENSG00000111432	0.0337536	7.95667	4.43755	3.4997	1.91567	0.937845	Gq
FZD2	frizzled homolog 2 (Drosophila)	210220_at	2535	ENSG00000180340	6.68747e-08	10.07	7.29209	3.987	9.88397	3.30509	Gq
FZD3	frizzled homolog 3 (Drosophila)	219683_at	7976	ENSG00000104290	9.64751e-12	7.295	6.87409	3.1228	13.4664	3.75129	Gq
FZD4	frizzled homolog 4 (Drosophila)	218665_at	8322	ENSG00000174804	0.000602196	9.45333	6.215	5.9485	1.20289	0.2665	Gq
FZD5	frizzled homolog 5 (Drosophila)	206136_at	7855	ENSG00000163251	1.73146e-10	6.665	6.22564	3.9873	4.71853	2.23834	Gq
FZD6	frizzled homolog 6 (Drosophila)	203987_at	8323	ENSG00000164930	2.18825e-13	9.08	7.402	3.9283	11.1093	3.4737	Gq
FZD7	frizzled homolog 7 (Drosophila)	203705_s_at	8324	ENSG00000155760	3.33067e-16	10.685	10.3711	4.0931	77.6003	6.27799	Gq
FZD8	frizzled homolog 8 (Drosophila)	216587_s_at	8325	ENSG00000177283	0.000384434	6.285	5.40927	4.5048	1.87186	0.904473	Gq
FZD9	frizzled homolog 9 (Drosophila)	207639_at	8326	ENSG00000188763	0.00327067	5.98	5.02164	4.7347	1.22005	0.286936	Gq
GABBR1	gamma-aminobutyric acid (GABA) B receptor, 1	203146_s_at	2550	ENSG00000204681 /// ENSG00000206466 /// ENSG00000206511	5.95651e-05	11.135	6.75136	5.956	1.73551	0.795364	Gq,Gi
GABBR1	gamma-aminobutyric acid (GABA) B receptor, 1 /// ubiquitin D	205890_s_at	10537 /// 2550	ENSG00000204681 /// ENSG00000206468 /// ENSG00000206513	0.00371834	10.11	4.60564	4.2801	1.25313	0.325536	Gq,Gi
GABBR2	gamma-aminobutyric acid (GABA) B receptor, 2	209990_s_at	9568	ENSG00000136928	9.7739e-06	11.45	5.21273	3.0172	4.58057	2.19553	Gq,Gi
GALR1	galanin receptor 1	220821_at	2587	ENSG00000166573	0.00889306	4.25	3.36773	2.8171	1.46472	0.550627
GALR2	galanin receptor 2	211226_at	8811	ENSG00000182687	4.71171e-07	4.43	4.012	3.2282	1.72166	0.7838	Gq,Gi
GALR3	galanin receptor 3	33579_i_at	8484	ENSG00000128310	0.0103786	7.275	6.16109	5.7881	1.29503	0.372991
GCGR	glucagon receptor	210565_at	2642	---	5.33777e-05	7.26667	5.21436	4.8421	1.29438	0.372264	Gs,Gq
GHRHR	growth hormone releasing hormone receptor	207825_s_at	2692	ENSG00000106128	3.28692e-05	10.47	5.04682	4.6895	1.28104	0.357318	Gs
GHSR	growth hormone secretagogue receptor	224554_at	2693	ENSG00000121853	0.238469	5.09	4.28791	4.1633	1.09021	0.124609	G11
GIPR	gastric inhibitory polypeptide receptor	208105_at	2696	ENSG00000010310	0.192432	5.01	3.69455	3.8034	-1.07837	-0.108855	Gs
GLP1R	glucagon-like peptide 1 receptor	211232_x_at	2740	ENSG00000112164	0.0432034	6.21	5.39936	5.5097	-1.07948	-0.110336	Gs
GLP2R	glucagon-like peptide 2 receptor	221312_at	9340	ENSG00000065325	0.771726	4.5	3.49973	3.4819	1.01243	0.0178273	Gs
GNRHR	Gonadotropin-releasing hormone receptor	1568661_at	2798	---	0.00282835	3.63333	2.86845	2.7665	1.07323	0.101955	Gq
GNRHR2	gonadotropin-releasing hormone (type 2) receptor 2	1553067_a_at	114814	ENSG00000180290	0.556226	4.875	4.00136	3.9498	1.03639	0.0515636	Gq
GPBAR1	G protein-coupled bile acid receptor 1	1552501_a_at	151306	ENSG00000179921	0.000269143	6.07667	4.69727	5.0552	-1.28158	-0.357927	Gs
GPR1	G protein-coupled receptor 1	214605_x_at	2825	ENSG00000183671	0.00919773	6.37	2.73909	2.6066	1.09618	0.132491	orphan
GPR101	G protein-coupled receptor 101	1553544_at	83550	ENSG00000165370	0.0246836	5.77	4.35136	4.5634	-1.15832	-0.212036	orphan
GPR103	G protein-coupled receptor 103	1555533_at	84109	ENSG00000186867	0.0545956	3.88	3.06836	2.9725	1.0687	0.0958636	Gq
GPR107	G protein-coupled receptor 107	211977_at	57720	ENSG00000148358	8.60423e-14	7.59	7.17709	5.2952	3.68558	1.88189
GPR108	G protein-coupled receptor 108	225058_at	56927	ENSG00000125734	4.95681e-06	8.22	7.04427	6.5794	1.3802	0.464873
GPR109B	G protein-coupled receptor 109B /// G protein-coupled receptor 109B	205220_at	8843	---	0.0493088	9.13667	3.72545	3.6086	1.08437	0.116855	Gi
GPR110	G protein-coupled receptor 110	220907_at	266977	ENSG00000153292	0.126436	4.93	3.80682	3.6797	1.09211	0.127118	orphan
GPR111	G protein-coupled receptor 111	1553036_at	222611	ENSG00000164393	0.0745331	3.78	2.90955	3.0256	-1.08377	-0.116055	orphan
GPR112	G protein-coupled receptor 112	1553006_at	139378	ENSG00000156920	0.00206784	4.48	3.36064	3.5962	-1.17737	-0.235564	orphan
GPR113	G protein-coupled receptor 113	1553016_at	165082	ENSG00000173567	0.0215134	5.205	3.96882	4.1385	-1.12481	-0.169682	orphan
GPR114	G protein-coupled receptor 114	229971_at	221188	ENSG00000159618	2.18098e-07	5.33	4.98336	3.7533	2.34577	1.23006	orphan
GPR115	G protein-coupled receptor 115	1553031_at	221393	ENSG00000153294	0.983019	5.67333	3.66091	3.6635	-1.0018	-0.00259091	orphan
GPR116	G protein-coupled receptor 116	1561104_at	221395	---	0.0692565	4.55	3.79973	3.8934	-1.06708	-0.0936727
GPR12	G protein-coupled receptor 12	214558_at	2835	ENSG00000132975	0.0137801	6.845	4.45427	4.7776	-1.25121	-0.323327
GPR123	G protein-coupled receptor 123	239221_at	84435	ENSG00000197177	9.57807e-08	7.185	4.61291	3.9687	1.56288	0.644209	orphan
GPR124	G protein-coupled receptor 124	65718_at	25960	ENSG00000020181	0.00551814	8.4	5.76591	5.1479	1.53476	0.618009	orphan
GPR125	G protein-coupled receptor 125	1555122_at	166647	ENSG00000152990	1.46663e-09	4.32	3.94118	2.6555	2.43797	1.28568	orphan
GPR126	G protein-coupled receptor 126	213094_at	57211	ENSG00000112414	9.1835e-08	9.89	4.99209	2.999	3.98089	1.99309	orphan
GPR128	G protein-coupled receptor 128	1553296_at	84873	ENSG00000144820	0.0557943	5.385	3.04891	2.9441	1.07535	0.104809	orphan
GPR132	G protein-coupled receptor 132	223887_at	29933	ENSG00000183484	0.260493	4.505	3.55382	3.4743	1.05667	0.0795182
GPR133	G protein-coupled receptor 133	1562783_at	283383	---	0.080058	4.645	3.78291	3.6279	1.11343	0.155009	orphan
GPR135	G protein-coupled receptor 135	226666_at	64582	---	2.08722e-14	8.55	7.267	5.1061	4.47194	2.1609	orphan
GPR137	G protein-coupled receptor 137	219430_at	56834	ENSG00000173264	0.00138668	5.9	4.33018	3.8027	1.44141	0.527482
GPR137B	G protein-coupled receptor 137B	204137_at	7107	ENSG00000077585	9.88142e-10	8.65	5.853	4.0746	3.43046	1.7784
GPR137C	G protein-coupled receptor 137C	242592_at	283554	---	2.55513e-08	5.61	3.80709	2.5972	2.3132	1.20989
GPR141	G protein-coupled receptor 141	1563720_at	353345	---	0.770701	4.38333	3.01936	3.0048	1.01015	0.0145636	orphan
GPR143	G protein-coupled receptor 143	206696_at	4935	ENSG00000101850	7.07299e-08	7.455	6.80091	4.1995	6.06879	2.60141
GPR144	G protein-coupled receptor 144	216289_at	347088	---	0.319471	7.36	5.41064	5.6005	-1.14066	-0.189864	orphan
GPR146	G protein-coupled receptor 146	228770_at	115330	ENSG00000164849	0.135217	7.82	4.11727	4.2188	-1.07291	-0.101527	orphan
GPR15	G protein-coupled receptor 15	208524_at	2838	ENSG00000154165	0.853544	4.865	3.75455	3.7422	1.00859	0.0123455
GPR150	G protein-coupled receptor 150	231349_at	285601	---	0.00237689	5.65667	4.95382	4.711	1.1833	0.242818
GPR153	G protein-coupled receptor 153	221902_at	387509	ENSG00000158292	0.00280041	9.08	6.24882	6.6973	-1.3646	-0.448482	orphan
GPR155	G protein-coupled receptor 155	231166_at	151556	ENSG00000163328	0.511447	8.83333	3.43655	3.5288	-1.06603	-0.0922545
GPR156	G protein-coupled receptor 156	239607_at	165829	ENSG00000175697	0.000883697	7.565	6.78664	6.4486	1.26403	0.338036	orphan
GPR157	G protein-coupled receptor 157	220901_at	80045	---	0.00878767	5.99	3.96591	4.4052	-1.35594	-0.439291	orphan
GPR158	G protein-coupled receptor 158	232195_at	57512	ENSG00000151025	0.0207466	10.09	4.41318	4.1984	1.16053	0.214782	orphan
GPR160	G protein-coupled receptor 160	223423_at	26996	ENSG00000173890	0	8.71	8.27118	3.4442	28.3835	4.82698	orphan
GPR161	G protein-coupled receptor 161	214104_at	23432	ENSG00000143147	2.00769e-08	8.77	7.00455	4.978	4.07428	2.02655	orphan
GPR162	G protein-coupled receptor 162	205056_s_at	27239	ENSG00000110811	0.468976	8.34	5.30136	5.4003	-1.07098	-0.0989364	orphan
GPR17	G protein-coupled receptor 17	206190_at	2840	ENSG00000144230	0.213323	6.8	3.43045	3.3504	1.05706	0.0800545	Gi
GPR171	G protein-coupled receptor 171	207651_at	29909	ENSG00000174946	0.000395633	6.99333	2.86364	3.1332	-1.20544	-0.269564	orphan
GPR172A	G protein-coupled receptor 172A	222155_s_at	79581	ENSG00000185803	5.21139e-13	8.51	7.25882	4.6793	5.9774	2.57952
GPR172B	G protein-coupled receptor 172B	220756_s_at	55065	ENSG00000132517	4.28557e-07	6.32	4.66527	4.2743	1.31128	0.390973
GPR173	G protein-coupled receptor 173	221299_at	54328	ENSG00000184194	8.29851e-05	5.14667	4.54073	4.0824	1.37395	0.458327	orphan
GPR174	G protein-coupled receptor 174	224285_at	84636	ENSG00000147138	0.599229	3.7	2.91745	2.9398	-1.01561	-0.0223455
GPR175	G protein-coupled receptor 175	218855_at	131601	ENSG00000163870	2.63684e-09	7.96	6.37255	5.3286	2.06186	1.04395
GPR176	G protein-coupled receptor 176	206673_at	11245	ENSG00000166073	2.48361e-09	7.55	6.86936	3.9235	7.70537	2.94586	orphan
GPR177	G protein-coupled receptor 177	228949_at	79971	ENSG00000116729	0.0114497	8.75	5.07909	3.7415	2.52729	1.33759
GPR178	G protein-coupled receptor 178	225127_at	57583	ENSG00000146433	9.22359e-05	9.87	7.47655	6.8693	1.52335	0.607245
GPR18	G protein-coupled receptor 18	210279_at	2841	ENSG00000125245	0.0473319	7.21333	3.13	3.0019	1.09285	0.1281	Gi
GPR180	G protein-coupled receptor 180	1566257_at	160897	---	6.70453e-06	5.24	4.16973	3.1747	1.99312	0.995027
GPR19	G protein-coupled receptor 19	207183_at	2842	ENSG00000183150	1.90338e-09	7.45667	6.85745	4.1804	6.39549	2.67705
GPR20	G protein-coupled receptor 20	214510_at	2843	---	1.55087e-05	6.51667	4.84064	4.2971	1.45754	0.543536
GPR21	G protein-coupled receptor 21	221294_at	2844	ENSG00000188394	0.622986	6.96	5.89709	5.9407	-1.03069	-0.0436091	orphan
GPR22	G protein-coupled receptor 22	221288_at	2845	ENSG00000172209	4.95177e-05	6.58	2.91591	3.1655	-1.18887	-0.249591
GPR23	G protein-coupled receptor 23	206960_at	2846	ENSG00000147145	6.99451e-09	5.235	4.65836	2.8191	3.57827	1.83926	Gs,Gq
GPR25	G protein-coupled receptor 25	221363_x_at	2848	ENSG00000170128	0.595417	4.16333	3.30845	3.2786	1.02091	0.0298545
GPR26	G protein-coupled receptor 26	244617_at	2849	ENSG00000154478	0.19013	6.91667	4.72364	4.8325	-1.07838	-0.108864	orphan
GPR27	G protein-coupled receptor 27	221306_at	2850	ENSG00000170837	0.00196255	6.73	6.01227	5.4466	1.48008	0.565673	orphan
GPR3	G protein-coupled receptor 3	214613_at	2827	ENSG00000181773	0.0139736	6.555	5.78073	5.5457	1.17693	0.235027	orphan,Gs
GPR30	G protein-coupled receptor 30	210640_s_at	2852	ENSG00000164850	0.0660657	7.61667	4.97864	5.2162	-1.179	-0.237564
GPR31	G protein-coupled receptor 31	208556_at	2853	ENSG00000120436	0.509929	6.28	5.07518	5.1217	-1.03277	-0.0465182
GPR32	G protein-coupled receptor 32	221469_at	2854	ENSG00000142511	0.862583	4.62	3.69791	3.6886	1.00647	0.00930909	orphan
GPR34	G protein-coupled receptor 34	223620_at	2857	ENSG00000171659	0.00624214	7.55333	3.588	3.9411	-1.2773	-0.3531	orphan
GPR35	G protein-coupled receptor 35	210264_at	2859	ENSG00000178623	0.25788	7.435	5.93927	6.0435	-1.07492	-0.104227	orphan
GPR37	G protein-coupled receptor 37 (endothelin receptor type B-like)	209631_s_at	2861	ENSG00000170775	2.39586e-13	11.32	6.69164	3.1001	12.0548	3.59154	orphan
GPR37L1	G protein-coupled receptor 37 like 1	207055_at	9283	ENSG00000170075	0.000143074	6.03	4.59027	4.2998	1.22304	0.290473	orphan
GPR39	G protein-coupled receptor 39	208600_s_at	2863	ENSG00000183840	7.71231e-07	4.605	3.91655	3.6077	1.23872	0.308845	orphan
GPR4	G protein-coupled receptor 4	206236_at	2828	ENSG00000177464	0.161695	6.09	4.54436	4.4393	1.07554	0.105064
GPR44	G protein-coupled receptor 44	216464_x_at	11251	ENSG00000183134	1.58418e-06	4.75333	4.30591	3.7617	1.45822	0.544209	orphan
GPR45	G protein-coupled receptor 45	211175_at	11250	ENSG00000135973	0.00921998	5.45	4.85436	4.6914	1.11958	0.162964	orphan
GPR50	G protein-coupled receptor 50	208311_at	9248	ENSG00000102195	0.00107216	5.13	4.53891	4.2796	1.19691	0.259309
GPR52	G protein-coupled receptor 52	221313_at	9293	ENSG00000203737	0.0459813	6.14	4.37845	4.5888	-1.15697	-0.210345	orphan
GPR55	G protein-coupled receptor 55	231745_at	9290	ENSG00000135898	0.99007	5.33	4.32436	4.3253	-1.00065	-0.000936364	orphan
GPR56	G protein-coupled receptor 56	206582_s_at	9289	ENSG00000205336	0.41984	8.06	6.13136	6.2175	-1.06152	-0.0861364
GPR6	G protein-coupled receptor 6	1553507_a_at	2830	ENSG00000146360	0.84356	6.3525	4.55891	4.539	1.0139	0.0199091	Gq
GPR61	G protein-coupled receptor 61	244618_at	83873	---	0.884126	5.4	4.38936	4.3763	1.0091	0.0130636	orphan
GPR62	G protein-coupled receptor 62	1554559_at	118442	ENSG00000180929	0.00173242	8.50667	5.46636	5.75	-1.21726	-0.283636
GPR63	G protein-coupled receptor 63 /// G protein-coupled receptor 63	220993_s_at	81491	ENSG00000112218	1.63389e-08	6	5.30182	3.7223	2.9887	1.57952	orphan
GPR64	G protein-coupled receptor 64	206002_at	10149	ENSG00000173698	1.28888e-07	9.61	6.67518	3.8202	7.23494	2.85498
GPR65	G protein-coupled receptor 65	214467_at	8477	ENSG00000140030	0.361004	5.6	2.90973	2.9581	-1.0341	-0.0483727
GPR68	G protein-coupled receptor 68	211249_at	8111	ENSG00000119714	3.4972e-13	4.62	3.94409	3.1797	1.69865	0.764391
GPR75	G protein-coupled receptor 75	220481_at	10936	ENSG00000119737	0.515274	5.5	4.42245	4.4781	-1.03932	-0.0556455	orphan
GPR77	G protein-coupled receptor 77	221149_at	27202	ENSG00000134830	0.302963	4.53	3.64027	3.7138	-1.05229	-0.0735273
GPR78	G protein-coupled receptor 78	1553063_at	27201	ENSG00000155269	1.48627e-06	5.94	4.95109	4.4233	1.44172	0.527791	orphan
GPR81	G protein-coupled receptor 81	224131_at	27198	ENSG00000196917	0.0172744	4.055	3.32109	3.2033	1.08507	0.117791	orphan
GPR82	G protein-coupled receptor 82	1553316_at	27197	ENSG00000171657	0.00266343	4.095	3.33836	3.143	1.14501	0.195364	orphan
GPR83	G protein-coupled receptor 83	222953_at	10888	ENSG00000123901	0.0244069	7.31	4.59609	3.9091	1.60992	0.686991	orphan
GPR84	G protein-coupled receptor 84	223767_at	53831	ENSG00000139572	0.00135448	6.81333	3.89927	3.6656	1.17582	0.233673	orphan
GPR85	G protein-coupled receptor 85	219898_at	54329	ENSG00000164604	0.152176	3.76	2.66482	2.5938	1.05046	0.0710182	orphan
GPR87	G protein-coupled receptor 87	219936_s_at	53836	ENSG00000138271	0.00131961	7.82667	3.89891	2.8073	2.13112	1.09161	orphan
GPR88	G protein-coupled receptor 88	220313_at	54112	ENSG00000181656	0.947857	10.8567	2.77155	2.7744	-1.00198	-0.00285455	orphan
GPR89A	G protein-coupled receptor 89A	1562412_at	51463	---	0.00214217	4.36	3.46527	3.2359	1.17233	0.229373
GPR89A	G protein-coupled receptor 89A /// similar to G protein-coupled receptor 89	220642_x_at	51463 /// 653519	ENSG00000117262 /// ENSG00000196644 /// ENSG00000188092	0	8.41	8.04636	6.6805	2.57731	1.36586
GPR92	G protein-coupled receptor 92	230252_at	57121	ENSG00000184574	0.0168504	6.65333	3.66591	3.5313	1.0978	0.134609	orphan
GPR97	G protein-coupled receptor 97	1553723_at	222487	ENSG00000182885	0.469353	6.16667	3.67518	3.6313	1.03088	0.0438818	orphan
GPR98	G protein-coupled receptor 98	223582_at	84059	ENSG00000164199	4.37539e-12	9.42667	6.71027	4.44	4.82414	2.27027
GPRASP1	G protein-coupled receptor associated sorting protein 1	204793_at	9737	ENSG00000198932	0.886219	9.44667	4.90727	4.8865	1.0145	0.0207727
GPRASP2	G protein-coupled receptor associated sorting protein 2	228027_at	114928	ENSG00000158301	7.01019e-10	9.53	8.05791	5.5152	5.82682	2.54271
GPRC5A	G protein-coupled receptor, family C, group 5, member A	203108_at	9052	ENSG00000013588	0.101763	9.68667	4.70845	4.4014	1.23718	0.307055
GPRC5B	G protein-coupled receptor, family C, group 5, member B	203631_s_at	51704	ENSG00000167191	3.85047e-07	8.22	6.51682	4.8859	3.0971	1.63092
GPRC5C	G protein-coupled receptor, family C, group 5, member C	219327_s_at	55890	ENSG00000170412	2.32722e-08	8.96	6.69636	5.8808	1.75999	0.815564
GPRC5D	G protein-coupled receptor, family C, group 5, member D	221297_at	55507	ENSG00000111291	0.0885995	6.11	5.09064	4.9628	1.09265	0.127836
GPRC6A	G protein-coupled receptor, family C, group 6, member A	1552775_at	222545	ENSG00000173612	0.0619287	6.275	5.30936	5.1187	1.14129	0.190664	Gq
GRM1	glutamate receptor, metabotropic 1	210939_s_at	2911	ENSG00000152822	0.000590058	5.35	4.69682	4.3723	1.25225	0.324518	Gq
GRM2	glutamate receptor, metabotropic 2	208465_at	2912	ENSG00000164082	7.8461e-08	6.41	5.80436	5.0101	1.73419	0.794264	Gi
GRM3	Glutamate receptor, metabotropic 3	242221_at	2913	---	0.0160669	3.065	2.67518	2.5649	1.07944	0.110282	Gi
GRM4	glutamate receptor, metabotropic 4	210234_at	2914	ENSG00000124493	0.0112833	8.74333	6.41382	6.1417	1.20758	0.272118	Gi
GRM5	glutamate receptor, metabotropic 5	1565389_s_at	2915	ENSG00000168959	1.70735e-08	6.08	5.06064	4.5423	1.4323	0.518336	Gq
GRM7	Glutamate receptor, metabotropic 7	224116_at	2917	---	0.818618	3.79667	3.01227	3.0216	-1.00649	-0.00932727	Gi
GRM8	Glutamate receptor, metabotropic 8	1556800_a_at	2918	---	0.000356005	3.83667	3.09936	2.8882	1.15762	0.211164	Gi
GRPR	gastrin-releasing peptide receptor	207929_at	2925	ENSG00000126010	6.88338e-15	7.39	7.15518	5.926	2.34434	1.22918	Gq
HCRTR1	hypocretin (orexin) receptor 1	207619_at	3061	ENSG00000121764	0.0132752	4.16667	3.13618	3.2365	-1.07201	-0.100318
HCRTR2	hypocretin (orexin) receptor 2	207393_at	3062	ENSG00000137252	0.492405	5.32	3.68255	3.7376	-1.0389	-0.0550545
HRH1	Histamine receptor H1	216735_x_at	3269	---	0.00757239	3.74	2.89336	3.0845	-1.14166	-0.191136
HRH2	histamine receptor H2	220805_at	3274	ENSG00000113749	0.244821	6.58	5.26527	5.381	-1.08352	-0.115727
HRH3	histamine receptor H3	221663_x_at	11255	ENSG00000101180	1.19013e-08	7.715	6.96791	6.3564	1.52786	0.611509	Gq
HRH4	histamine receptor H4	221170_at	59340	---	0.51956	3.36333	2.53527	2.5136	1.01514	0.0216727
HSD3B1	Hydroxy-delta-5-steroid dehydrogenase, 3 beta- and steroid delta-isomerase 1	233791_at	3283	---	0.805183	6.34	3.01164	3.0216	-1.00693	-0.00996364
HTR1A	5-hydroxytryptamine (serotonin) receptor 1A	221351_at	3350	ENSG00000178394	0.345618	6.18	4.91609	4.8243	1.06569	0.0917909	Gi
HTR1B	5-hydroxytryptamine (serotonin) receptor 1B	210799_at	3351	ENSG00000135312	0.0017779	5.12	4.32318	4.0352	1.22093	0.287982	Gi
HTR1D	5-hydroxytryptamine (serotonin) receptor 1D	207368_at	3352	ENSG00000179546	0.0010734	5.605	4.86164	3.9867	1.83393	0.874936	Gi
HTR1E	5-hydroxytryptamine (serotonin) receptor 1E	207404_s_at	3354	ENSG00000168830	0.753648	6.22	4.37609	4.4311	-1.03887	-0.0550091	Gi
HTR1F	5-hydroxytryptamine (serotonin) receptor 1F	221458_at	3355	ENSG00000179097	0.00320226	5.03	3.687	3.896	-1.15589	-0.209	Gi
HTR2A	5-hydroxytryptamine (serotonin) receptor 2A	207135_at	3356	ENSG00000102468	0.450418	8.65	3.97345	4.0549	-1.05808	-0.0814455	Gq
HTR2B	5-hydroxytryptamine (serotonin) receptor 2B	206638_at	3357	ENSG00000135914	0.0291103	7.56333	3.14064	2.801	1.26544	0.339636	Gq
HTR2C	5-hydroxytryptamine (serotonin) receptor 2C	207307_at	3358	ENSG00000147246	1.36709e-05	9.22	3.46364	2.7557	1.63347	0.707936	Gq
HTR4	5-hydroxytryptamine (serotonin) receptor 4	1562678_at	3360	---	0.0104275	4.53667	3.07891	3.304	-1.16885	-0.225091
HTR5A	5-hydroxytryptamine (serotonin) receptor 5A	221362_at	3361	ENSG00000157219	0.100982	6.17	4.64227	4.5326	1.07898	0.109673
HTR6	5-hydroxytryptamine (serotonin) receptor 6	1552857_a_at	3362	ENSG00000158748	0.296102	4.61333	3.56209	3.4505	1.08042	0.111591	Gs
HTR7	5-hydroxytryptamine (serotonin) receptor 7 (adenylate cyclase-coupled)	236281_x_at	3363	ENSG00000148680	1.53143e-05	4.805	4.01382	3.0718	1.92121	0.942018	Gs
HTR7	5-hydroxytryptamine (serotonin) receptor 7 (adenylate cyclase-coupled) /// 5-hydroxytryptamine (serotonin) receptor 7 pseudogene	216098_s_at	3363 /// 93164	ENSG00000148680	8.12864e-06	4.905	3.94845	2.8476	2.14482	1.10085	Gs
IAPP	islet amyloid polypeptide	207062_at	3375	ENSG00000121351	0.00114261	8.15	3.84927	3.615	1.17631	0.234273	Gs
IL8RA	interleukin 8 receptor, alpha	207094_at	3577	---	0.195652	6.69	5.64273	5.4943	1.10836	0.148427	Gq
IL8RB	interleukin 8 receptor, beta	207008_at	3579	ENSG00000180871	0.000933755	6.1	3.59182	3.0357	1.47031	0.556118	Gq
ITGB1	integrin, beta 1 (fibronectin receptor, beta polypeptide, antigen CD29 includes MDF2, MSK12)	1561042_at	3688	---	4.46166e-06	4.64	4.093	2.794	2.46058	1.299
KISS1R	KISS1 receptor	242517_at	84634	ENSG00000116014	2.06248e-11	7.68	7.01755	3.9327	8.48459	3.08485	Gq
LANCL1	LanC lantibiotic synthetase component C-like 1 (bacterial)	202019_s_at	10314	ENSG00000115365	4.62484e-11	8.67	6.912	5.9076	2.00611	1.0044
LGR4	leucine-rich repeat-containing G protein-coupled receptor 4	218326_s_at	55366	ENSG00000205213	1.11022e-16	8.405	7.78982	3.578	18.5303	4.21182	orphan
LGR5	leucine-rich repeat-containing G protein-coupled receptor 5	213880_at	8549	---	0.0658211	7.73667	3.50618	2.8537	1.57187	0.652482	orphan
LGR6	leucine-rich repeat-containing G protein-coupled receptor 6	227819_at	59352	ENSG00000133067	0.126345	7.75333	4.71682	4.8729	-1.11426	-0.156082	orphan
LHCGR	luteinizing hormone/choriogonadotropin receptor	207240_s_at	3973	---	0.147977	4.63	2.86591	2.7796	1.06165	0.0863091	Gs
LOC648979	hypothetical protein LOC648979	206998_x_at	648979	---	2.4024e-05	13.01	4.98818	4.1876	1.7418	0.800582
LPHN1	latrophilin 1	219145_at	22859	ENSG00000072071	3.30296e-08	8.035	6.48409	5.095	2.61914	1.38909
LPHN2	latrophilin 2	206953_s_at	23266	ENSG00000117114	0	9.5	9.04727	4.9714	16.864	4.07587
LPHN3	latrophilin 3	209866_s_at	23284	ENSG00000150471	7.6665e-10	9.08333	5.89818	4.2146	3.21224	1.68358
LTB4R	leukotriene B4 receptor	210128_s_at	1241	ENSG00000196943	0.279366	8.54	6.03564	5.8885	1.10737	0.147136	Gq
LTB4R2	leukotriene B4 receptor 2	220130_x_at	56413	ENSG00000196943	0.951659	6.31	4.64064	4.6294	1.00782	0.0112364	Gq
MAS1	MAS1 oncogene	208210_at	4142	ENSG00000130368	0.216446	6.1	4.37473	4.4929	-1.08536	-0.118173
MAS1L	MAS1 oncogene-like	234820_at	116511	ENSG00000204687 /// ENSG00000206470 /// ENSG00000206515	0.083465	5.425	4.59973	4.492	1.07753	0.107727
MASS1	Monogenic, audiogenic seizure susceptibility 1 homolog (mouse)	240631_at	84059	---	0.900183	3.46	2.86409	2.8574	1.00465	0.00669091
MC1R	melanocortin 1 receptor (alpha melanocyte stimulating hormone receptor)	205458_at	4157	---	0.290822	7.19	5.32527	5.4293	-1.07477	-0.104027
MC2R	melanocortin 2 receptor (adrenocorticotropic hormone)	208568_at	4158	ENSG00000185231	0.65252	7.26	5.91727	5.8853	1.02241	0.0319727	Gs
MC3R	melanocortin 3 receptor	221442_at	4159	ENSG00000124089	0.000645431	5.33	4.53655	4.0578	1.39353	0.478745	Gs
MC4R	melanocortin 4 receptor	221467_at	4160	ENSG00000166603	0.14279	5.16	4.02091	4.1844	-1.11999	-0.163491	Gs
MC5R	melanocortin 5 receptor	208565_at	4161	ENSG00000176136	0.703513	6.03	4.70391	4.7247	-1.01452	-0.0207909
MCHR1	melanin-concentrating hormone receptor 1	223855_s_at	2847	---	0.000135982	4.33	3.80845	3.2328	1.49035	0.575655	Gq,Gi
MCHR2	melanin-concentrating hormone receptor 2 /// melanin-concentrating hormone receptor 2	224408_at	84539	ENSG00000152034	0.0660482	5.91	4.58518	4.769	-1.13589	-0.183818	Gq
MLNR	motilin receptor	221365_at	2862	ENSG00000102539	0.000118473	3.39	3.00073	2.8107	1.14079	0.190027
MRGPRF	MAS-related GPR, member F	227727_at	219928	---	7.16872e-09	10.085	7.80155	4.5605	9.45479	3.24105	orphan
MRGPRX1	MAS-related GPR, member X1	1553401_at	259249	ENSG00000170255	0.30606	3.67333	3.08245	3.0162	1.04699	0.0662545	orphan,Gq
MRGPRX2	MAS-related GPR, member X2	1553889_at	117194	ENSG00000183695	0.430696	5.89	4.88427	4.9365	-1.03686	-0.0522273	orphan,Gs,Gq
MRGPRX3	MAS-related GPR, member X3	1553293_at	117195	---	0.000214058	3.90667	3.37973	3.1166	1.20008	0.263127	orphan
MRGPRX4	MAS-related GPR, member X4	1553504_at	117196	ENSG00000179817	0.627279	4.91	3.98618	3.957	1.02043	0.0291818	orphan
MTNR1A	melatonin receptor 1A	221369_at	4543	ENSG00000168412	0.110058	4.9	4.17545	4.0444	1.09509	0.131055	Gi
MTNR1B	melatonin receptor 1B	208516_at	4544	ENSG00000134640	0.143487	5.06	4.13227	4.0599	1.05144	0.0723727	Gi
NMBR	neuromedin B receptor	207333_at	4829	ENSG00000135577	0.247185	3.95	2.85018	2.9055	-1.03909	-0.0553182
NMUR1	neuromedin U receptor 1	221383_at	10316	ENSG00000171596	1.0939e-06	5.32	4.53773	3.7505	1.72575	0.787227
NMUR2	neuromedin U receptor 2	224088_at	56923	ENSG00000132911	0.372559	6.87	5.65982	5.7523	-1.0662	-0.0924818
NPBWR2	neuropeptides B/W receptor 2	221358_at	2832	ENSG00000125522	0.00687604	4.02333	3.34836	3.1224	1.16956	0.225964
NPFFR1	neuropeptide FF receptor 1	221387_at	64106	ENSG00000148734	0.00957094	6.81333	5.60391	5.7664	-1.11922	-0.162491	Gq
NPFFR2	neuropeptide FF receptor 2	224169_at	10886	ENSG00000056291	1.57332e-05	6.48	5.313	3.5633	3.36289	1.7497	Gq
NPY	neuropeptide Y	206001_at	4852	ENSG00000122585	0.0213468	11.3033	5.44982	4.8861	1.47807	0.563718
NPY1R	neuropeptide Y receptor Y1	205440_s_at	4886	---	1.53517e-08	8.21667	5.33618	3.0731	4.80016	2.26308
NPY2R	neuropeptide Y receptor Y2	210729_at	4887	ENSG00000185149	0.000932209	4.18	3.18636	2.4504	1.66551	0.735964
NPY5R	neuropeptide Y receptor Y5	207400_at	4889	ENSG00000164129	0.000146615	5.64667	4.68882	4.196	1.40719	0.492818	Gi
NPY6R	neuropeptide Y receptor Y6 (pseudogene)	210444_at	4888	ENSG00000159279	0.000814429	8.16	5.61064	5.1367	1.38889	0.473936
NTSR1	neurotensin receptor 1 (high affinity)	207360_s_at	4923	---	0.0079731	6.56	5.47564	5.2313	1.18455	0.244336	Gq
NTSR2	neurotensin receptor 2	206899_at	23620	ENSG00000169006	0.925929	8.645	4.02482	4.0181	1.00467	0.00671818	Gq
OPN1MW	opsin 1 (cone pigments), medium-wave-sensitive (color blindness, deutan) /// opsin 1 (cone pigments), long-wave-sensitive (color blindness, protan) /// similar to Green-sensitive opsin (Green cone photoreceptor pigment)	221327_s_at	2652 /// 5956 /// 653368	ENSG00000102076 /// ENSG00000147380 /// ENSG00000166160	0.199082	5.3	4.21955	4.3469	-1.09229	-0.127355
OPN1SW	Opsin 1 (cone pigments), short-wave-sensitive (color blindness, tritan)	229549_at	611	---	8.15733e-11	8.29333	6.88391	5.2948	3.00863	1.58911	vision
OPN3	opsin 3 (encephalopsin, panopsin)	219032_x_at	23596	ENSG00000054277	0.000206643	9.5	6.39164	5.0261	2.57672	1.36554
OPN4	opsin 4 (melanopsin)	234226_at	94233	ENSG00000122375	0.000712217	6.29	5.58164	5.235	1.27159	0.346636
OPN5	opsin 5	1568914_at	221391	ENSG00000124818	0.192298	4.73333	3.53109	3.6504	-1.08621	-0.119309
OPRD1	opioid receptor, delta 1	207792_at	4985	ENSG00000116329	0.124048	5.99	5.01364	4.9261	1.06255	0.0875364
OPRK1	opioid receptor, kappa 1	207553_at	4986	ENSG00000082556	0.345551	5.67667	4.53527	4.4814	1.03805	0.0538727
OPRL1	opiate receptor-like 1	206563_s_at	4987	ENSG00000125510	1.70198e-05	6.04	5.03891	4.7189	1.24834	0.320009
OPRM1	opioid receptor, mu 1	207994_s_at	4988	ENSG00000112038	0.00051855	3.52	2.93155	2.7653	1.12213	0.166245
OR10A3	olfactory receptor, family 10, subfamily A, member 3	1567250_at	26496	---	0.000210843	4.28	3.60682	3.362	1.18494	0.244818	oderant
OR10A4	olfactory receptor, family 10, subfamily A, member 4	1555655_at	283297	ENSG00000170782	0.0157732	5.01	4.04527	3.8566	1.13971	0.188673	taste,oderant
OR10A5	olfactory receptor, family 10, subfamily A, member 5	1555651_at	144124	ENSG00000166363	0.0203906	5.44	3.89636	4.2008	-1.23494	-0.304436	taste,oderant
OR10H2	olfactory receptor, family 10, subfamily H, member 2	208543_at	26538	ENSG00000171942	0.0218712	4.22	3.40891	3.2495	1.11683	0.159409	oderant
OR10H3	olfactory receptor, family 10, subfamily H, member 3	208520_at	26532	ENSG00000171936	0.00412669	5.9	4.37882	4.699	-1.24849	-0.320182	oderant
OR10J1	olfactory receptor, family 10, subfamily J, member 1	221346_at	26476	ENSG00000196184	0.517742	6.63	5.61436	5.566	1.03409	0.0483636	oderant
OR11A1	olfactory receptor, family 11, subfamily A, member 1	221343_at	26531	ENSG00000204694	0.970724	4.07	3.17255	3.1747	-1.00149	-0.00215455	oderant
OR12D2	olfactory receptor, family 12, subfamily D, member 2	221344_at	26529	ENSG00000204690 /// ENSG00000168787	0.0264273	5.89	5.05291	4.9478	1.07558	0.105109	oderant
OR12D3	olfactory receptor, family 12, subfamily D, member 3 /// olfactory receptor, family 12, subfamily D, member 3	221431_s_at	81797	ENSG00000204692 /// ENSG00000112462	0.00603611	5.28	4.00255	4.1846	-1.1345	-0.182055	oderant
OR1A2	olfactory receptor, family 1, subfamily A, member 2	221445_at	26189	ENSG00000172150	0.472229	3.995	3.14773	3.1139	1.02372	0.0338273	oderant
OR1C1	olfactory receptor, family 1, subfamily C, member 1	1567054_at	26188	---	0.897503	4.29	3.36518	3.3582	1.00485	0.00698182	oderant
OR1D2	olfactory receptor, family 1, subfamily D, member 2	221464_at	4991	ENSG00000184166	0.084255	6.16	5.00164	5.1706	-1.12425	-0.168964	oderant
OR1F1	olfactory receptor, family 1, subfamily F, member 1	221402_at	4992	ENSG00000168124	5.79131e-05	7.92	5.56209	6.0726	-1.42455	-0.510509	oderant
OR1F2	olfactory receptor, family 1, subfamily F, member 2	217308_at	26184	ENSG00000203581	0.336855	5.72	4.55182	4.4937	1.04111	0.0581182	oderant
OR1G1	olfactory receptor, family 1, subfamily G, member 1	221375_at	8390	ENSG00000183024	0.173297	5.74	4.88364	4.7162	1.12306	0.167436	oderant
OR1J2	olfactory receptor, family 1, subfamily J, member 2	1567256_at	26740	---	0.373013	4.87	4.02291	3.9696	1.03764	0.0533091	oderant
OR1J4	olfactory receptor, family 1, subfamily J, member 4	1567282_at	26219	---	0.026922	4.53	4.00227	3.8707	1.09549	0.131573	oderant
OR1Q1	olfactory receptor, family 1, subfamily Q, member 1	1567064_at	158131	---	0.597863	3.79333	2.87409	2.8968	-1.01587	-0.0227091	oderant
OR2B6	olfactory receptor, family 2, subfamily B, member 6	216522_at	26212	ENSG00000124657	0.00428626	4.42	3.27345	3.1499	1.08942	0.123555	oderant
OR2C1	olfactory receptor, family 2, subfamily C, member 1	221460_at	4993	ENSG00000168158	0.000702674	6.36	4.878	5.4243	-1.46034	-0.5463
OR2C3	olfactory receptor, family 2, subfamily C, member 3	1555018_at	81472	ENSG00000196242	0.253314	3.08333	2.47136	2.5026	-1.02189	-0.0312364	oderant
OR2F1	olfactory receptor, family 2, subfamily F, member 1	208526_at	26211	ENSG00000173525	0.747613	5.65	4.90982	4.8822	1.01933	0.0276182	oderant
OR2F1	olfactory receptor, family 2, subfamily F, member 1 /// olfactory receptor, family 2, subfamily F, member 2	208525_s_at	135948 /// 26211	ENSG00000173525	0.305014	3.58	3.04682	3.0028	1.03098	0.0440182	oderant
OR2H1	Olfactory receptor, family 2, subfamily H, member 1	1567656_at	26716	---	0.000403372	2.84	2.57027	2.4106	1.11703	0.159673	oderant
OR2H2	olfactory receptor, family 2, subfamily H, member 2	208573_s_at	7932	ENSG00000204657 /// ENSG00000206467 /// ENSG00000206512	0.000113074	5.83	3.78273	4.3543	-1.48614	-0.571573
OR2J2	olfactory receptor, family 2, subfamily J, member 2 /// olfactory receptor, family 2, subfamily J, member 2	208508_s_at	26707	ENSG00000204700 /// ENSG00000198362	0.70189	3.46	2.80109	2.8176	-1.01151	-0.0165091	oderant
OR2K2	olfactory receptor, family 2, subfamily K, member 2	1567272_at	26248	---	1.44063e-06	4.28	3.62791	2.9648	1.58349	0.663109	oderant
OR2L13	olfactory receptor, family 2, subfamily L, member 13	1554706_at	284521	ENSG00000196071	0.0584363	3.67667	2.61982	2.5175	1.0735	0.102318	oderant
OR2L2	olfactory receptor, family 2, subfamily L, member 2	1567237_at	26246	---	0.000509302	4.3	3.86618	3.5925	1.20889	0.273682	oderant
OR2M4	olfactory receptor, family 2, subfamily M, member 4	1566288_at	26245	---	0.125008	3.79667	2.93664	2.8799	1.04011	0.0567364	oderant
OR2S2	olfactory receptor, family 2, subfamily S, member 2	221409_at	56656	ENSG00000122718	0.9498	5.38	4.23545	4.2408	-1.00371	-0.00534545	oderant
OR2W1	olfactory receptor, family 2, subfamily W, member 1 /// olfactory receptor, family 2, subfamily W, member 1	221451_s_at	26692	ENSG00000204704 /// ENSG00000124732 /// ENSG00000206525	0.0076075	3.55	3.05936	2.9053	1.1127	0.154064	oderant
OR2W3	olfactory receptor, family 2, subfamily W, member 3	241881_at	343171	ENSG00000198281	0.00387418	6.57	3.838	3.5591	1.21327	0.2789	oderant
OR3A1	olfactory receptor, family 3, subfamily A, member 1	221353_at	4994	ENSG00000180090	0.0287191	4.53	3.84518	3.6556	1.14043	0.189582	oderant
OR4D1	olfactory receptor, family 4, subfamily D, member 1	1567068_at	26689	---	0.000152557	4.965	3.72164	3.5102	1.15784	0.211436	oderant
OR4D2	olfactory receptor, family 4, subfamily D, member 2	1555377_at	124538	---	0.285205	5.09	3.59573	3.6631	-1.04781	-0.0673727	oderant
OR51B4	olfactory receptor, family 51, subfamily B, member 4	234469_at	79339	ENSG00000183251	0.00154191	5.49333	3.84573	4.0883	-1.1831	-0.242573	oderant
OR51E1	olfactory receptor, family 51, subfamily E, member 1	229768_at	143503	ENSG00000180785	0.18273	6.47667	4.18091	4.3796	-1.14766	-0.198691	oderant
OR51E2	olfactory receptor, family 51, subfamily E, member 2 /// olfactory receptor, family 51, subfamily E, member 2	221424_s_at	81285	ENSG00000167332	0.132396	5.19	4.467	4.3567	1.07945	0.1103	oderant
OR52A1	olfactory receptor, family 52, subfamily A, member 1	221329_at	23538	ENSG00000182070	0.0320848	6.15	5.28791	5.0074	1.21462	0.280509	oderant
OR5I1	olfactory receptor, family 5, subfamily I, member 1	208521_at	10798	ENSG00000167825	0.350903	4.92	4.10909	4.05	1.04181	0.0590909	oderant
OR5K1	olfactory receptor, family 5, subfamily K, member 1	1567287_at	26339	---	0.000861897	2.85333	2.57955	2.4325	1.1073	0.147045	oderant
OR5L2	olfactory receptor, family 5, subfamily L, member 2	1567285_at	26338	---	0.0429344	5.23	4.26518	4.1441	1.08755	0.121082	oderant
OR5P2	olfactory receptor, family 5, subfamily P, member 2	1552991_at	120065	ENSG00000183303	0.0683608	4.64	3.44473	3.6004	-1.11394	-0.155673	taste,oderant
OR5P3	olfactory receptor, family 5, subfamily P, member 3	1553078_at	120066	ENSG00000182334	0.266553	4.285	3.397	3.4821	-1.06076	-0.0851	taste,oderant
OR5V1	olfactory receptor, family 5, subfamily V, member 1	234840_s_at	81696	ENSG00000204694 /// ENSG00000112461	0.772076	4.6	3.36336	3.3832	-1.01384	-0.0198364	oderant
OR5V1	olfactory receptor, family 5, subfamily V, member 1 /// olfactory receptor, family 5, subfamily V, member 1 /// olfactory receptor, family 12, subfamily D, member 3 /// olfactory receptor, family 12, subfamily D, member 3	208098_at	81696 /// 81797	ENSG00000204694 /// ENSG00000204692 /// ENSG00000112461 /// ENSG00000112462	0.0378882	4.28	2.912	3.0285	-1.0841	-0.1165	oderant
OR6A2	olfactory receptor, family 6, subfamily A, member 2	221465_at	8590	ENSG00000184933	0.00983376	4.96	4.08427	3.8702	1.15996	0.214073	oderant
OR6W1P	olfactory receptor, family 6, subfamily W, member 1 pseudogene	1553061_at	89883	---	0.0215189	4.99	3.75436	3.9647	-1.15696	-0.210336
OR7A17	olfactory receptor, family 7, subfamily A, member 17 /// olfactory receptor, family 7, subfamily A, member 17	208509_s_at	26333	ENSG00000185385	0.512923	5.05	4.14982	4.1205	1.02053	0.0293182	oderant
OR7A5	olfactory receptor, family 7, subfamily A, member 5	208285_at	26659	---	0.0226502	7.4	4.79018	4.9919	-1.15007	-0.201718	oderant
OR7C1	olfactory receptor, family 7, subfamily C, member 1	216690_at	26664	ENSG00000127530	0.00957965	4.58	3.50255	3.6556	-1.11192	-0.153055	oderant
OR7D2	olfactory receptor, family 7, subfamily D, member 2	1562337_at	162998	---	0.255843	4.34	3.21973	3.1251	1.06779	0.0946273	oderant
OR8B8	olfactory receptor, family 8, subfamily B, member 8	1555212_at	26493	ENSG00000197125	0.00243915	6.13	4.72845	4.9228	-1.1442	-0.194345	taste,oderant
OR8D1	olfactory receptor, family 8, subfamily D, member 1	1555661_at	283159	ENSG00000196341	0.710172	5.34	4.40773	4.4357	-1.01958	-0.0279727	taste,oderant
OR8D2	olfactory receptor, family 8, subfamily D, member 2	234766_at	283160	ENSG00000197263	0.000219363	5.84	4.36773	4.7107	-1.26837	-0.342973	taste,oderant
OR8G1	olfactory receptor, family 8, subfamily G, member 1	1567060_at	26494	---	0.104583	4.68	3.68609	3.9191	-1.17528	-0.233009	oderant
OR8G2	olfactory receptor, family 8, subfamily G, member 2	1567056_at	26492	---	0.00298814	3.98333	3.28182	3.1387	1.10429	0.143118	oderant
OXER1	oxoeicosanoid (OXE) receptor 1	1553222_at	165140	ENSG00000162881	0.000197759	8.59333	7.02982	7.3265	-1.22832	-0.296682	Go,Gi
OXGR1	oxoglutarate (alpha-ketoglutarate) receptor 1	1553319_at	27199	ENSG00000165621	0.255413	4.57667	3.57073	3.5009	1.04959	0.0698273	Gq
OXTR	oxytocin receptor	206825_at	5021	ENSG00000180914	1.02713e-05	11.87	5.37245	3.9004	2.77417	1.47205	Gq
P2RY1	purinergic receptor P2Y, G-protein coupled, 1	207455_at	5028	ENSG00000169860	0.00023708	6.15	4.47291	3.317	2.22825	1.15591	Gq
P2RY10	purinergic receptor P2Y, G-protein coupled, 10	1553856_s_at	27334	ENSG00000078589	0.0552236	6.25333	3.62118	3.8078	-1.13809	-0.186618
P2RY11	purinergic receptor P2Y, G-protein coupled, 11	214546_s_at	5032	ENSG00000176130	2.71363e-05	5.57	5.06382	4.3666	1.62138	0.697218	Gs,Gq
P2RY12	purinergic receptor P2Y, G-protein coupled, 12	224102_at	64805	ENSG00000169313	0.551145	7.50333	3.03755	3.0093	1.01977	0.0282455
P2RY13	purinergic receptor P2Y, G-protein coupled, 13 /// purinergic receptor P2Y, G-protein coupled, 13	220005_at	53829	ENSG00000181631	0.000206227	6.94333	3.35655	3.7989	-1.35882	-0.442355	Gi
P2RY14	purinergic receptor P2Y, G-protein coupled, 14	206637_at	9934	ENSG00000174944	0.326137	8.32	3.17473	3.236	-1.04339	-0.0612727
P2RY2	purinergic receptor P2Y, G-protein coupled, 2	206277_at	5029	ENSG00000175591	0.0476439	8.12	4.68109	4.4869	1.14408	0.194191	Gq
P2RY4	pyrimidinergic receptor P2Y, G-protein coupled, 4	221466_at	5030	ENSG00000186912	0.962484	5.88	4.45109	4.4483	1.00194	0.00279091	Gq
P2RY5	purinergic receptor P2Y, G-protein coupled, 5	218589_at	10161	ENSG00000139679	0.000851636	9.37333	6.293	5.2717	2.02975	1.0213
P2RY6	pyrimidinergic receptor P2Y, G-protein coupled, 6	208373_s_at	5031	ENSG00000171631	0.109427	5.99333	4.47727	4.2818	1.1451	0.195473	Gq
P2RY8	purinergic receptor P2Y, G-protein coupled, 8	229686_at	286530	ENSG00000182162	0.154944	8.16667	4.41982	4.4893	-1.04934	-0.0694818
PAQR5	progestin and adipoQ receptor family member V	242871_at	54852	ENSG00000137819	1.09654e-05	9.34	5.32973	3.4193	3.7592	1.91043
PAQR7	progestin and adipoQ receptor family member VII	242123_at	164091	ENSG00000182749	0.247322	6.94	5.31	5.2126	1.06984	0.0974
PAQR8	progestin and adipoQ receptor family member VIII	226423_at	85315	ENSG00000170915	0.000132197	9.38	6.35609	5.5929	1.69724	0.763191
PML	promyelocytic leukemia /// hypothetical protein LOC161527 /// similar to promyelocytic leukemia protein isoform 9	211014_s_at	161527 /// 5371 /// 652671	ENSG00000140464	0.000206797	7.05	6.13318	5.4851	1.56708	0.648082
PPARGC1A	peroxisome proliferative activated receptor, gamma, coactivator 1, alpha	1569141_a_at	10891	---	0.869455	4.46	3.392	3.4035	-1.008	-0.0115
PPYR1	pancreatic polypeptide receptor 1	210956_at	5540	ENSG00000204174	1.79895e-05	4.815	4.41573	3.9963	1.3374	0.419427
PRB1	proline-rich protein BstNI subfamily 1 /// proline-rich protein BstNI subfamily 2	207752_x_at	440083 /// 5542	---	0.00178609	12.775	6.62864	6.3192	1.23922	0.309436
PRB4	proline-rich protein BstNI subfamily 4	216881_x_at	5545	ENSG00000121335	0.00297842	13.345	5.40045	5.1456	1.19322	0.254855
PRB4	proline-rich protein BstNI subfamily 4 /// proline-rich protein HaeIII subfamily 1 /// proline-rich protein HaeIII subfamily 2	243389_at	5545 /// 5554 /// 5555	ENSG00000196229	0.0275831	9.70667	4.753	4.9654	-1.15861	-0.2124
PRH1	proline-rich protein HaeIII subfamily 1 /// proline-rich protein HaeIII subfamily 2	205272_s_at	5554 /// 5555	ENSG00000134551	0.0156845	14.6433	5.52209	5.2084	1.24288	0.313691
PRLHR	prolactin releasing hormone receptor	231805_at	2834	ENSG00000119973	0.0302532	5.37667	3.71436	3.5832	1.09518	0.131164
PROKR1	Prokineticin receptor 1	241526_at	10887	---	0.000413116	5.5	3.83209	4.2013	-1.29164	-0.369209	Gq
PROKR2	prokineticin receptor 2	234450_at	128674	ENSG00000101292	8.16511e-07	4.93	4.58755	3.8562	1.66019	0.731345	Gq
PRPF40B	PRP40 pre-mRNA processing factor 40 homolog B (S. cerevisiae)	226966_at	25766	ENSG00000110844	8.5649e-05	7.58	6.15955	5.6109	1.46271	0.548645
PTAFR	platelet-activating factor receptor	206278_at	5724	ENSG00000169403	0.417292	6.68	4.76818	4.8741	-1.07618	-0.105918	Gq
PTGDR	prostaglandin D2 receptor (DP)	215937_at	5729	---	0.00496314	4.07	3.28682	3.1809	1.07618	0.105918	Gs,Gq
PTGER1	Prostaglandin E receptor 1 (subtype EP1), 42kDa	231201_at	5731	---	7.0024e-06	6.25	5.30209	4.5878	1.64068	0.714291	Gq
PTGER2	prostaglandin E receptor 2 (subtype EP2), 53kDa	206631_at	5732	ENSG00000125384	0.000205072	5.30667	3.33709	2.9713	1.28859	0.365791	Gs
PTGER3	prostaglandin E receptor 3 (subtype EP3)	211265_at	5733	---	8.18101e-05	3.76	2.95773	2.7578	1.14864	0.199927	Gq,Gi
PTGER4	prostaglandin E receptor 4 (subtype EP4)	204896_s_at	5734	ENSG00000171522	4.3211e-06	5.83	5.09591	4.0406	2.07816	1.05531	Gs
PTGFR	prostaglandin F receptor (FP)	1555097_a_at	5737	ENSG00000122420	0.00467481	8.205	3.39891	3.068	1.25781	0.330909	Gq
PTGIR	prostaglandin I2 (prostacyclin) receptor (IP)	1555620_a_at	5739	ENSG00000160013	6.26775e-06	7.43333	6.85755	6.3863	1.38631	0.471245	Gs
PTHR1	parathyroid hormone receptor 1	205911_at	5745	ENSG00000160801	0.943024	10.72	5.35482	5.3654	-1.00736	-0.0105818	Gs,Gq
PTHR2	parathyroid hormone receptor 2	206772_at	5746	ENSG00000144407	0.00930119	5.81333	3.44291	3.2317	1.15766	0.211209	Gs
QRFP	---	1553538_s_at	---	ENSG00000198804	0.316211	14.2	12.9411	13.1584	-1.16256	-0.217309	Gq
RABGAP1	RAB GTPase activating protein 1	244228_at	23637	---	0.656083	3.4	2.64227	2.6289	1.00931	0.0133727	orphan
RGR	retinal G protein coupled receptor	1555219_at	5995	ENSG00000148604	0.0525444	5.58	4.46118	4.5861	-1.09045	-0.124918
RHO	rhodopsin (opsin 2, rod pigment) (retinitis pigmentosa 4, autosomal dominant)	206455_s_at	6010	ENSG00000163914	0.0774057	6.07	5.42427	5.3124	1.08063	0.111873	vision
RRH	retinal pigment epithelium-derived rhodopsin homolog	208314_at	10692	ENSG00000180245	0.202055	5.35667	4.435	4.5189	-1.05988	-0.0839
RUNX1	runt-related transcription factor 1 (acute myeloid leukemia 1; aml1 oncogene)	1570350_at	861	---	0.0791797	4.79	3.86864	4.0031	-1.09768	-0.134464	Gq
RXFP1	relaxin/insulin-like family peptide receptor 1	1552715_a_at	59350	ENSG00000171509	0.0231037	5.965	2.762	2.8704	-1.07803	-0.1084	Gs,Gi
RXFP2	relaxin/insulin-like family peptide receptor 2	1553326_at	122042	ENSG00000133105	0.337683	3.61333	2.89527	2.8537	1.02924	0.0415727	Gs
RXFP3	relaxin/insulin-like family peptide receptor 3	221066_at	51289	ENSG00000182631	0.00563701	4.22	3.42973	3.2864	1.10445	0.143327	Gi
SCTR	Secretin receptor	1562049_at	6344	---	0.582309	5.25	2.55455	2.5398	1.01027	0.0147455	Gs
SLC26A6	solute carrier family 26, member 6	221572_s_at	65010	ENSG00000008300	6.43929e-14	6.68	6.32618	4.6472	3.20202	1.67898
SMO	Smoothened homolog (Drosophila)	233717_x_at	6608	---	0.0401937	4.17	3.46791	3.2454	1.16676	0.222509
SSTR1	somatostatin receptor 1	235591_at	6751	ENSG00000139874	4.35022e-05	7.725	3.62936	2.9019	1.65573	0.727464
SSTR2	somatostatin receptor 2	214597_at	6752	ENSG00000180616	0.0842232	5.46	3.66573	3.4206	1.1852	0.245127	Gq
SSTR3	somatostatin receptor 3	1553178_a_at	6753	ENSG00000183473	0.776202	5.89333	5.17164	5.1474	1.01694	0.0242364
SSTR4	somatostatin receptor 4	214556_at	6754	---	0.777902	5.96	4.82045	4.8433	-1.01596	-0.0228455
SSTR5	somatostatin receptor 5	214555_at	6755	ENSG00000162009	0.00139989	4.88667	4.09109	3.76	1.25796	0.331091
SUCNR1	succinate receptor 1	223939_at	56670	ENSG00000198829	0.169021	8.47667	3.54245	3.6798	-1.09988	-0.137345
TAAR1	trace amine associated receptor 1	1553930_at	134864	ENSG00000146399	0.0767201	3.52	2.80564	2.7458	1.04235	0.0598364	Gs
TAAR2	trace amine associated receptor 2	221394_at	9287	ENSG00000146378	0.355704	5.18333	4.04955	4.1134	-1.04525	-0.0638545	orphan
TAAR3	trace amine associated receptor 3	221393_at	9288	ENSG00000179073	0.762983	4.93333	3.65773	3.6765	-1.0131	-0.0187727
TAAR5	trace amine associated receptor 5	221459_at	9038	ENSG00000135569	0.0010637	5.66	4.93518	4.6785	1.19473	0.256682	orphan
TAAR8	trace amine associated receptor 8	1553552_at	83551	ENSG00000146385	0.00301813	4.61	3.84	3.6178	1.16651	0.2222	orphan
TAAR9	trace amine associated receptor 9	1553066_at	134860	ENSG00000188604	0.0129797	4.905	3.717	3.8879	-1.12576	-0.1709	orphan
TACR1	tachykinin receptor 1	208048_at	6869	---	0.0657071	4.37	3.40573	3.3353	1.05003	0.0704273
TACR2	tachykinin receptor 2	214348_at	6865	ENSG00000075073	1.25811e-05	7.675	4.92473	5.396	-1.38633	-0.471273
TACR3	tachykinin receptor 3	208183_at	6870	ENSG00000169836	5.23439e-06	4.895	4.07273	3.5865	1.40078	0.486227
TAS1R1	taste receptor, type 1, member 1	1555417_a_at	80835	ENSG00000173662	0.170624	4.56	3.82255	3.7575	1.04612	0.0650455	taste
TAS2R1	taste receptor, type 2, member 1	221324_at	50834	ENSG00000169777	0.000119541	6.30667	4.84845	5.1596	-1.24069	-0.311145	Gq
TAS2R10	taste receptor, type 2, member 10	221397_at	50839	ENSG00000121318	0.00625077	3.62	2.69927	2.8223	-1.08902	-0.123027	Gq
TAS2R13	taste receptor, type 2, member 13	221395_at	50838	---	0.501926	4.38667	3.68455	3.6497	1.02445	0.0348455	Gq
TAS2R14	Taste receptor, type 2, member 14	1570384_at	50840	---	0.000837626	3.12	2.64609	2.5548	1.06532	0.0912909
TAS2R16	taste receptor, type 2, member 16	221444_at	50833	ENSG00000128519	1.47427e-05	4.44	3.20318	3.4068	-1.15158	-0.203618	Gq
TAS2R3	taste receptor, type 2, member 3	221456_at	50831	ENSG00000127362	0.0229091	5.30333	4.46973	4.2339	1.17758	0.235827	Gq
TAS2R38	taste receptor, type 2, member 38	1553555_at	5726	ENSG00000183609	4.18275e-05	6.47	4.40973	5.1275	-1.64464	-0.717773	Gq
TAS2R39	taste receptor, type 2, member 39	1553553_at	259285	ENSG00000179257	0.00117597	5.45	3.67664	4.028	-1.27577	-0.351364	Gq
TAS2R4	taste receptor, type 2, member 4	221392_at	50832	ENSG00000127364	0.0311133	5.44	3.81591	4.0306	-1.16046	-0.214691
TAS2R40	taste receptor, type 2, member 40	1553556_at	259286	---	0.437385	3.51333	2.843	2.8858	-1.03011	-0.0428	Gq
TAS2R41	taste receptor, type 2, member 41	1553558_at	259287	---	0.532267	5.43	4.31845	4.2941	1.01702	0.0243545
TAS2R45	taste receptor, type 2, member 45	234108_at	259291	---	0.671384	3.81	3.00136	2.9831	1.01274	0.0182636
TAS2R5	taste receptor, type 2, member 5	231757_at	54429	ENSG00000127366	0.0282649	5.06	4.35955	4.2247	1.09798	0.134845	Gq
TAS2R50	taste receptor, type 2, member 50	1553561_at	259296	---	0.0189911	3.81	2.96791	2.8145	1.11219	0.153409	Gq
TAS2R7	taste receptor, type 2, member 7	221396_at	50837	ENSG00000121377	0.0350959	5.13	3.88936	4.0019	-1.08113	-0.112536	Gq
TAS2R8	taste receptor, type 2, member 8	221398_at	50836	ENSG00000121314	0.205351	4.31	3.17336	3.252	-1.05602	-0.0786364	Gq
TAS2R9	taste receptor, type 2, member 9	221461_at	50835	ENSG00000121381	0.305766	3.91	3.02818	2.9613	1.04745	0.0668818	Gq
TBXA2R	thromboxane A2 receptor	207554_x_at	6915	---	0.602687	7.56667	5.76136	5.7229	1.02702	0.0384636	Gq
TMEM11	transmembrane protein 11	203437_at	8834	ENSG00000178307	8.88178e-16	9.3	8.49336	6.7952	3.24488	1.69816
TRHR	thyrotropin-releasing hormone receptor	211438_at	7201	ENSG00000174417	0.989828	5.49	4.35227	4.3534	-1.00078	-0.00112727	Gq
TSHR	thyroid stimulating hormone receptor	210055_at	7253	ENSG00000165409	0.000179199	10.395	2.88591	3.2101	-1.25196	-0.324191
TUBB3	tubulin, beta 3	202154_x_at	10381	---	1.11022e-16	13.04	11.2741	7.4482	14.181	3.82589
UNQ338	LGLL338	235496_at	646962	ENSG00000196196	0.178974	8.98667	5.69655	5.788	-1.06544	-0.0914545
UTS2R	urotensin 2 receptor	1553262_a_at	2837	ENSG00000181408	0.55771	8.155	7.01018	7.0504	-1.02827	-0.0402182
VAV2	vav 2 oncogene	226063_at	7410	ENSG00000160293	2.33147e-15	8.33	7.66473	5.4359	4.68753	2.22883
VIPR1	vasoactive intestinal peptide receptor 1	205019_s_at	7433	ENSG00000114812	1.70882e-07	9.98	6.38164	5.5508	1.77872	0.830836	Gs
VIPR2	vasoactive intestinal peptide receptor 2	205947_s_at	7434	ENSG00000106018	6.97279e-07	4.45667	3.90573	3.3353	1.48496	0.570427	Gs,Gq
VN1R1	Vomeronasal 1 receptor 1	236092_at	57191	---	2.21236e-05	6.4	5.06927	4.3554	1.6402	0.713873	pheromone
VN1R2	vomeronasal 1 receptor 2	1553549_at	317701	ENSG00000196131	0.000401063	4.85667	3.51745	3.9124	-1.31489	-0.394945
VN1R3	vomeronasal 1 receptor 3	223873_s_at	317702	---	0.00484322	3.25	2.80436	2.6241	1.13309	0.180264	pheromone
VN1R4	vomeronasal 1 receptor 4	1553560_at	317703	ENSG00000174677	0.712251	4.45	3.68727	3.6689	1.01282	0.0183727	pheromone
XCR1	chemokine (C motif) receptor 1	221468_at	2829	ENSG00000173578	0.249382	4.38	3.46473	3.5757	-1.07996	-0.110973	Gq
XPR1	xenotropic and polytropic retrovirus receptor	222581_at	9213	ENSG00000143324	3.33067e-16	8.47	8.13427	6.1793	3.87709	1.95497
