# Supplementary material for: Gi-Coupled GPCR Signaling Controls the Formation and Organization of Human Pluripotent Colonies
Source: PLoS One. 2009 Nov 10;4(11):e7780. doi: 10.1371/journal.pone.0007780 (PMC2777408; doi:10.1371/journal.pone.0007780)
Supplement: Dataset S2 — Raw dataset used to perform microarray analyses. (1.56 MB XLS) [file pone.0007780.s004.xls]

## Sheet: GPCRs - tissue expression level
			Nervous System	Nervous System	Nervous System	Nervous System	Nervous System	Nervous System	Nervous System	Nervous System	Nervous System	Nervous System	Nervous System	Nervous System	Nervous System	Nervous System	Nervous System	Nervous System	Nervous System	Nervous System	Nervous System	Nervous System	Nervous System	Nervous System	Nervous System	Nervous System	Nervous System	Nervous System	Nervous System	Nervous System	Nervous System	Nervous System	Nervous System	Nervous System	Nervous System	Nervous System	Nervous System	Nervous System	Organ Systems	Organ Systems	Organ Systems	Organ Systems	Organ Systems	Organ Systems	Organ Systems	Organ Systems	Organ Systems	Organ Systems	Organ Systems
			Subcortical	Subcortical	Subcortical	Subcortical	Subcortical	Subcortical	Subcortical	Subcortical	Subcortical	Subcortical	Subcortical	Cortex	Cortex	Cortex	Cortex	Cortex	Cortex	Forebrain	Forebrain	Forebrain	Forebrain	Forebrain	Midbrain	Midbrain	Hindbrain	Hindbrain	Hindbrain	Hindbrain	Hindbrain	Hindbrain	Hindbrain	Hindbrain	Pathway	Pathway	Pathway	Pathway	Cardiovascular	Cardiovascular	Cardiovascular	Cardiovascular	Cardiovascular	Cardiovascular	Cardiovascular	Cardiovascular	Endocrine	Endocrine	Endocrine
Probeset	Symbol	Description	Accumbens	Amygdala	Caudate	Globus_Pallidus	Gloubus_Pallidum_External	Gloubus_Pallidum_Internal	Substantia_Nigra	Putamen	Substantia_Nigra_Pars_Compacta	Substantia_Nigra_Reticulata	Subthalamic_Nucleus	Prefrontal_Cortex	Frontal_Cortex	Frontal_Lobe	Occipital_Lobe	Parietal_Lobe	Temporal_Lobe	Hippocampus	Hypothalamus	Thalamus	Thalamus_Lateral_Nuclei	Thalamus_Subthalamic_Nucleus	Midbrain	Ventral_Tegmental_Area	Vestibular_Nuclei_Superior	Cerebellar_Vermis	Cerebellum	Cerebral_Cortex	Cerebellar_Hemisphere	Medulla	Pons	Nodose_Nucleus	Corpus_Callosum	Spinal_Cord	Dorsal_Root_Ganglia	Trigeminal_Ganglia	Aorta	Coronary_Artery	Heart	Heart_Atrium	Heart_Ventricle	Saphenous_Vein	Vena_Cava	Pericardium	Adipose_Tissue	Adipose_Tissue_Omental	Adipose_Tissue_Subcutaneous
217434_at	MC2R	melanocortin 2 receptor (adrenocorticotropic hormone)	3.72667	3.88667	3.99333	3.71	3.7	3.76	3.77	3.9525	3.79	3.98667	3.78333	3.85	3.865	3.86	3.7	3.74333	4.02	3.84	3.82333	3.79	3.91	3.975	3.64667	3.99333	3.67	3.9	3.88333	3.57667	4.02	3.72667	3.66	3.74667	3.96333	3.80667	3.7	3.62667	3.76	4.02	4.02	3.85	4.28	3.73	3.77	3.58	3.65	3.74333	3.73
223582_at	GPR98	G protein-coupled receptor 98	7.26667	7.28	7.5	5.41	5.975	6.01	5.15667	6.6375	5.20333	5.62667	4.79333	6.41	5.29	6.27	6.17	6.05	6.81	6.97333	4.67	4.64333	4.76	4.96	4.67333	5.03333	4.87333	4.82	5.07	6.62333	5.2	4.72333	4.6	4.43333	5.77667	4.68333	5.96	5.44333	4.89667	5.04333	5.08	4.67333	4.85333	4.52333	5.2	4.3	4.68	4.55	4.96
216817_s_at	OR2H1	olfactory receptor, family 2, subfamily H, member 1	4.64667	4.75667	4.68333	4.44	4.645	4.78	4.50333	4.83	4.40333	4.55667	4.54333	4.2	4.485	4.73667	4.42	4.35	4.60667	4.73333	4.42333	4.51667	4.915	4.785	4.51	4.7	4.51667	4.66	4.69667	4.39667	4.87	4.46667	4.52	4.36667	4.67	4.59	4.56667	4.47667	4.44	4.81	4.81	4.49	4.78333	4.45	4.79	4.35	4.37	4.63333	4.5
211489_at	ADRA1A	adrenergic, alpha-1A-, receptor	4.03667	4.25	4.25667	4.15	4.38	4.305	4.26	4.205	4.02333	4.10333	4.28667	4.03	4.055	4.03	4.15667	4.07	4.14667	4.76333	3.98	4.13	3.93	4.03	4.2	4.05333	4.18667	4.36	3.94	4.28667	4.16	4.07	4.24	4.33	4.08333	4.19333	3.82667	3.78667	3.68667	4.10333	4.57	4.03333	4.46333	3.76667	4.23	4.01	4.025	4.04	4.21333
214510_at	GPR20	G protein-coupled receptor 20	4.57333	4.47	5.20667	4.76	4.83	5.35	4.55	4.5375	5.03667	5.27333	4.67333	5.09	4.705	4.80333	4.23667	4.63667	4.36667	4.39	4.4	4.49	4.9	4.965	4.48	4.52	4.30333	4.53	4.25	4.35667	4.35	4.74667	4.59	4.44333	4.57	4.30667	4.44	4.54667	5.82	6.51667	4.72	4.58333	5.04333	5.31667	5.22	5.27	4.705	5.07667	5.09667
47560_at	LPHN1	latrophilin 1	8.70667	8.94667	8.03667	6.76	7.655	7.475	7.33667	8.98	7.62333	7.23667	6.91333	9.15	8.265	8.72667	9.08333	9.17333	9.14333	8.66	8.83667	8.38	8.395	7.685	7.43333	7.45	7.64	8.33	9.04333	9.27	7.86	7.95667	7.57	7.66333	6.85	7.28667	7.3	6.69667	5.91667	6.06	5.63	6.45667	6.08	6.25667	5.74	5.51	5.98	6.50333	6.60333
207794_at	CCR2 /// LOC653518	chemokine (C-C motif) receptor 2 /// chemokine (C-C motif) receptor 2 /// similar to C-C chemokine receptor type 2 (C-C CKR-2) (CC-CKR-2) (CCR-2) (CCR2) (Monocyte chemoattractant protein 1 receptor) (MCP-1-R) /// similar to C-C chemokine receptor type 2 (C-C CKR-2) (CC-CKR-2) (CCR-2) (CCR2) (Monocyte chemoattractant protein 1 receptor) (MCP-1-R)	3.73333	3.94667	3.83333	3.64	4.19	3.565	4.01333	3.8175	3.54	3.59667	3.91333	3.49	3.73	3.87	3.47667	3.63667	3.83333	3.87	3.38	3.93667	3.765	3.6	3.69	3.97333	3.85667	3.73	3.83333	3.52	3.81	3.57333	3.39	3.57333	3.86667	3.84	3.68333	3.65333	3.57333	4.16	4	3.76333	4.26333	3.88333	3.74	3.49	3.675	3.8	3.81667
219145_at	LPHN1	latrophilin 1	6.79333	7.19	7.89333	6.19	7.45	7.4	6.19667	6.91	7.36	7.16333	5.88	6.62	6.54	7.19	7.13333	7.25	6.93333	6.79	6.89667	6.39333	8.035	7.38	5.96667	6.18333	5.99	7.07	7.20667	7.06	6.66	6.36667	6.74	6.51333	5.67	6.39333	6.23667	5.99333	5.88	5.66667	5.39	5.49	5.4	5.68667	5.83	5.62	5.35	5.70333	5.99667
1555417_a_at	TAS1R1	taste receptor, type 1, member 1	3.95333	3.98333	4.07	4	3.995	4.14	3.95667	3.965	4.17	4.00333	3.89333	3.97	3.95	3.97333	3.80667	3.98	3.91667	3.89333	3.93667	3.90667	3.91	4.01	3.83333	4.01333	3.75667	4.17	4.1	3.85	4.07	3.90333	4.14	3.89667	3.87667	3.87333	3.92	3.92667	4.03	4.40333	4.05	3.74667	3.94667	3.86	4.56	3.78	3.905	4.15333	4.16333
1567064_at	OR1Q1	olfactory receptor, family 1, subfamily Q, member 1	3.18667	3.24333	3.32333	3.05	3.48	3.225	2.97	3.195	3.44	3.5	3.07	3.55	3.055	3.01667	2.90333	2.96333	3	3.13333	3.01	3.01667	3.23	3.57	3.01667	2.94333	2.98667	3.45	2.92667	3.07	3.23	2.98333	3.39	2.95333	2.91667	2.94	2.85	3.04	3.40333	3.47333	3.49	3.13	3.39	3.38	3.62	3.04	3.03	3.14667	3.43333
208544_at	ADRA2B	adrenergic, alpha-2B-, receptor	6.15667	6.16	5.75	6.13	6.13	5.74	5.81333	6.16	6.05667	5.86	5.75667	5.93	5.87	6.01	5.54333	5.65667	5.77333	5.83667	5.83	5.97	6.375	6.195	5.92333	5.86667	5.66667	6.2	5.80333	5.44333	6.28	5.86667	6.14	5.68333	5.86	5.62667	5.42333	5.69	6.01333	6.17333	6.5	5.85333	6.33	6.03	6.66	6.34	5.945	5.92333	5.98667
214217_at	GRM5	Glutamate receptor, metabotropic 5	8.1	7.25	7.33667	4.97	5.81	5.57	5.64667	7.4325	5.56333	4.77667	4.54667	8.65	7.46	6.51333	7.32667	7.73667	8.04333	7.09333	5.42	7.23333	6.785	6.01	5.60667	5.25	6.08	4.31	4.74333	7.82667	4.19	5.99	4.88	5.51	4.89667	5.34667	3.86667	3.82	3.79333	4.00667	3.83	3.89333	3.80667	3.89	3.99	3.82	3.87	4.07667	3.80333
220351_at	CCRL1	chemokine (C-C motif) receptor-like 1	3.09333	3.17	3.22667	2.95	3.585	3.5	3.22667	3.07	3.51	3.52333	3.10667	3.07	2.995	3.1	2.97667	2.92667	3.13667	3.13667	3	3.17667	3.435	3.24	3.16667	3.12333	3.25	3.07	2.97	3.02	3.16	3.00333	3.26	3.11	3.22	3.19667	3.03	3.08667	5.00333	3.36	3.87	4.49667	3.81333	4.39667	4.57	3.95	4.24	3.68667	4.19667
229104_s_at	GPR39	G protein-coupled receptor 39	5.16667	5.25	5.14	5.47	5.52	5.235	4.87	5.5225	5.04667	5.29	5.09667	5.3	4.745	5.23667	4.84	4.80667	4.98667	5.03333	5.07	5.05333	5.035	5.035	5.04333	4.97	5.12333	5.66	5.29333	4.96333	5.76	5.09	5.32	4.94333	5.15667	4.81667	4.65667	5.05	5.17	5.15333	5.35	5.04333	4.98	5.13333	5.99	5.16	5.335	5.01667	5.11667
211523_at	GNRHR	gonadotropin-releasing hormone receptor	3.07667	3.25333	3.14	3.36	3.08	3.155	3.09333	3.1875	2.96333	3.05	3.06667	2.81	2.935	3.11333	2.83667	2.82	3.00333	3.18667	2.86	3.3	3.33	3.075	3.04	3	2.99	3.46	3.08333	2.93667	3.15	2.91	2.82	3.05	3.3	2.97667	2.88667	2.95333	2.89333	3.22333	3.39	3.31667	3.46333	3.01333	3.16	3.32	2.995	3.09667	3.08333
207639_at	FZD9	frizzled homolog 9 (Drosophila)	5.23	5.51333	5.36667	5.98	5.35	5.54	5.37	5.4725	5.38333	5.11333	5.21667	5.28	5.155	5.36	4.81	4.92333	5.23	5.39333	5.38333	5.46	5.46	5.4	5.39	5.35333	5.23667	5.17	5.05333	4.99667	5.56	5.14	5.14	4.9	5.43333	5.2	4.86667	4.99	5.07667	5.40667	5.71	5.02	5.36	5.21	5.84	5.32	4.98	5.24	5.33
220907_at	GPR110	G protein-coupled receptor 110	4.31333	4.26	4.15667	4.29	4.245	4.38	4.08333	4.3075	4.25	4.38667	4.01333	4.22	4.205	4.33333	3.79667	3.90333	4.04	4.32333	3.71667	4.16333	4.695	4.34	4.15333	3.96667	4.12667	4.73	4.07667	3.87667	4.9	4.20333	4.8	3.84667	4.11667	3.92667	3.76	4.10667	3.98333	4.10667	4.71	4.10667	4.24333	4.30333	4.87	4.49	4.14	3.92333	4.16333
216735_x_at	HRH1	Histamine receptor H1	3.31	3.31333	3.48	3.74	3.72	3.34	3.36333	3.27	3.47333	3.61333	3.41333	3.18	3.275	3.49	3.29	3.23	3.44	3.55	3.23	3.54	3.4	3.565	3.31667	3.54	3.32667	3.58	3.66667	3.20667	3.11	3.44333	3.11	3.28667	3.46	3.42667	3.32333	3.32	3.42	3.55333	3.18	3.36	3.43333	3.26333	3.16	3.32	3.28	3.36667	3.28
216256_at	GRM8	glutamate receptor, metabotropic 8	5.85333	5.31667	5.43	5.26	5.555	5.5	5.17333	5.3625	5.49	5.41333	5.37667	5.19	5.27	5.31	5.13333	5.37333	5.11667	5.31333	5.30667	5.43	5.86	5.585	5.32333	5.09667	5.20333	5.58	5.20333	5.27333	5.62	5.18	5.65	5.14	5.30667	4.88333	4.81667	5.05333	4.94333	5.32	5.88	5.25333	5.51	5.17	5.75	5.24	5.46	5.12667	5.4
237690_at	GPR115	G protein-coupled receptor 115	2.5	2.40333	2.50333	2.51	2.51	2.36	2.30667	2.4975	2.54333	2.57667	2.32333	2.45	2.485	2.40333	2.33	2.42333	2.32	2.35	2.37333	2.36333	2.575	2.485	2.39	2.27	2.23333	2.6	2.49	2.34333	2.51	2.47667	2.45	2.39	2.48667	2.23	2.30667	2.32333	2.36667	2.4	2.37	2.46	2.56667	2.46333	2.5	2.51	2.95	2.46667	2.31333
206723_s_at	EDG4	endothelial differentiation, lysophosphatidic acid G-protein-coupled receptor, 4	5.95667	6.37667	6.18667	5.72	6.305	5.825	6.20333	6.1675	6.14	6.15	6.23333	6.06	6.115	6.25	6.01	6.07333	5.80667	6.23333	6.22	6.08333	5.905	6.1	6.16667	5.91667	5.97333	5.93	5.94667	5.93333	6.23	6.21	6.19	6.13	6.22	5.97667	5.80667	5.95333	5.97667	5.93667	5.58	5.56	5.68	5.87667	6.03	5.77	6.525	6.12	6.35667
209866_s_at	LPHN3	latrophilin 3	7.71	8.25667	7.98	7.55	7.535	7.9	7.57333	7.54	7.86667	7.75667	7.02	7.67	7.48	7.49	7.93	7.86667	8.22	7.79667	7.81667	7.86667	7.44	7.46	7.94	7.68333	8.11	6.58	7.36	8.43	7.03	7.74	7.42	7.69333	6.62	7.29333	7.51667	7.48	6.55333	5.84333	5.16	5.10667	5.24	9.08333	6.24	5.76	6.515	5.35	4.96
219936_s_at	GPR87	G protein-coupled receptor 87	2.82333	3.09333	3.11667	2.86	3.07	2.85	3.06667	3.0375	2.97333	3.15667	2.93667	2.91	2.98	3.23667	2.83667	2.79333	3.03	3.07667	2.93667	2.91333	2.985	3.1	2.91	3.06333	2.93667	3.18	3.08667	2.84333	3.35	2.81667	2.98	2.96667	3.14667	2.86	2.91	2.85667	3.07667	3.13667	2.98	2.78667	3.04333	3.1	3.21	3.2	5.7	3.08333	3.17
207577_at	HTR4	5-hydroxytryptamine (serotonin) receptor 4	5.70667	4.08	6.42	3.84	4.73	4.25	3.73333	5.605	3.68667	3.45333	3.59667	4.05	3.805	4.06	3.75667	3.99667	4.31333	4.35333	3.61	3.52	3.905	3.71	3.53333	3.84	3.55	3.81	3.41	3.92333	3.65	3.74333	3.4	3.52667	3.66333	3.59	3.58	3.62667	4.17	4.14667	3.56	4.19333	3.87333	3.87667	3.76	3.7	3.525	3.71	3.78333
206236_at	GPR4	G protein-coupled receptor 4	4.97333	4.89333	5.02667	5.1	5.47	5.225	4.82333	4.755	5.31667	5.18333	4.85333	5.14	4.6	4.96	4.57667	4.57	4.60667	4.69	4.9	5.33	5.495	5.295	4.66	4.87667	4.56667	5.04	4.49333	4.44333	4.84	4.94333	4.95	4.96333	4.72667	4.91667	4.83333	5.21667	5.01333	5.15667	5.37	5.18333	5.24667	5.12	5.43	5.98	4.97	5.46	5.39333
224088_at	NMUR2	neuromedin U receptor 2	6.27333	6.51667	6.16	6.13	6.33	6.155	6.52333	6.27	6.09	6.30667	6.41667	6.27	6.52	6.44333	6.09	6.06	6.51667	6.47	6.07	6.6	6.255	6.725	6.44667	6.47	6.40333	6.25	6.20333	5.99	6.68	6.33333	6.43	6.16	6.12333	6.28333	6.16	5.98	6.24	6.42	6.71	6.25	6.78	6.12333	6.7	5.95	6.005	6.32	6.57
1566289_at	OR2M4	olfactory receptor, family 2, subfamily M, member 4	3.43333	3.58333	3.3	3.54	3.58	3.27	3.57	3.575	3.14	3.61	3.64	3.53	3.485	3.88	3.34	3.33667	3.72333	3.61333	3.3	3.48667	3.165	3.245	3.5	3.6	3.64	3.74	3.59667	3.38667	3.51	3.52667	3.38	3.45667	3.54333	3.54333	3.56667	3.42667	3.48667	3.72667	3.46	3.47667	3.63333	3.58667	4.1	3.98	3.425	3.74667	3.66667
216388_s_at	LTB4R	leukotriene B4 receptor	5.17	5.03667	5.27	5.26	5.19	5.61	5.06333	5.4125	5.31333	5.54667	5.26	5.07	5.115	5.13	4.73333	5.07667	5.04333	5.16333	5.20333	5.22667	5.855	5.435	4.94333	5.2	4.98667	5.21	5.05333	4.95	5.29	5.18667	5.25	5.08667	5.25333	4.91333	4.92	5.13667	5.40667	5.43	5.27	4.81333	5.34333	5.42	5.6	5.52	6.2	5.23667	5.87
215396_at	GPR98	G protein-coupled receptor 98	3.07	3.16	3.06333	2.87	3.245	3.095	3.18333	3.19	3.14	3.51	3.13	2.96	3.125	3.27667	2.95333	3.12667	3.42	3.23333	2.89667	3.11667	3.06	3.095	2.92667	3.27333	3.11667	3.05	3.12667	2.94333	3.22	3.03667	3.08	2.97667	3.21667	3.17	3.21	3.11333	3.12667	3.23	3.16	3.18	3.04333	3.14	3.1	3	2.865	3.47667	3.11
221902_at	GPR153	G protein-coupled receptor 153	7.3	8.01333	7.53	7.28	7.385	7.595	7.04333	7.39	7.50333	7.50667	6.90667	7.49	7.035	7.38	7.08	7.32	7.43	7.65	7.53333	8.38667	8.48	7.845	7.12	6.87667	7.17333	7.7	7.09667	7.08	7.63	7.25333	6.92	6.96	7.15	6.83	7.15667	7.17333	6.67667	7.50667	7.52	7.21	7.18333	7.21	7.02	7.46	7.465	7.58333	7.29667
212977_at	CMKOR1	chemokine orphan receptor 1	4.68333	5.40667	4.14333	5.19	5.34	4.73	4.78333	4.7525	4.84667	4.87	5.70333	5.29	4.63	4.77	4.80333	5.30667	4.88	4.76	4.99667	4.72667	4.525	4.195	5.77333	5.96667	4.76	3.86	4.48333	4.92333	4.45	5.70667	4.61	4.56	5.40667	6.69333	7.61	7.82	9.54333	7.36	7.62	7.98333	7.13	9.64333	10.61	9.1	7.955	8.63	9.02333
216881_x_at	PRB4	proline-rich protein BstNI subfamily 4	5.91333	5.87667	6.33	6.05	6.475	6.62	5.75333	5.8575	5.8	6.25333	5.69667	5.9	5.7	5.82333	5.39	5.58667	5.79	5.86	5.42333	5.75	6.51	6.16	5.6	5.65667	5.65333	5.83	5.52333	5.37	5.97	5.72	6.01	5.51667	5.72	5.59667	5.54333	5.34667	5.72667	5.78	6.06	5.96667	6.16	5.88	5.84	5.75	5.64	5.66667	5.99667
210565_at	GCGR	glucagon receptor	5.19	5.01333	5.12	5.31	5.3	5.105	5.06	5.215	5.00667	4.96333	5.20667	5.16	5.225	5.16	4.98333	5.06	5.09333	4.96	5.04667	5.00333	5.045	5.305	5.15667	5.04	4.93667	5.26	5.31	4.85	5.45	4.93333	5.31	5.12667	4.73	5.19	5.27333	5.25	5.51	5.43667	4.99	5.04667	4.94333	5.33	5.54	5.2	5.13	5.21667	5.52
204539_s_at	CELSR1	cadherin, EGF LAG seven-pass G-type receptor 1 (flamingo homolog, Drosophila)	4.24	4.49	4.53333	4.15	4.945	4.575	4.33333	4.2775	4.6	4.33	4.33333	4.47	4.445	4.22667	4.2	4.22	4.4	4.2	4.28667	4.36667	4.755	4.56	4.11	4.32667	4.19667	4.52	4.35333	4.19667	4.52	4.24667	4.6	4.27667	4.28667	4.26333	4.30667	4.30667	4.41	4.44667	4.3	4.14333	4.1	4.5	4.89	4.57	4.36	4.37	4.27667
1569141_a_at	PPARGC1A	peroxisome proliferative activated receptor, gamma, coactivator 1, alpha	3.65	3.85333	3.74667	3.52	3.77	3.78	3.78333	3.7675	3.65667	3.71333	3.67667	3.83	3.66	3.87	3.53	3.68	3.69333	3.79	3.44	3.67	3.5	3.695	3.60667	3.66667	3.78	3.82	3.66333	3.46333	4.01	3.67333	3.6	3.5	3.78	3.64	3.69333	3.61333	3.65	3.90333	3.87	4	4.06333	3.75	4.32	3.72	3.64	3.83333	3.72333
233348_at	GPR178	G protein-coupled receptor 178	4.37667	4.35333	4.74	4.44	4.64	4.3	4.32333	4.47	4.56333	4.65	4.28	4.31	4.425	4.50333	4.38667	4.30667	4.44	4.45333	4.39667	4.41	4.96	4.51	4.37333	4.38667	4.38667	4.51	4.43333	4.40333	4.64	4.25667	4.57	4.31333	4.51667	4.30333	4.34	4.40333	4.45333	4.53	4.68	4.29667	4.57667	4.57667	5.02	4.56	4.615	4.43333	4.32667
207235_s_at	GRM5	glutamate receptor, metabotropic 5	4.68	4.62	4.52667	4.43	4.085	4.605	4.05333	4.7125	4.53333	4.06333	3.9	4.4	4.55	4.43	4.02333	4.27333	4.37667	4.52333	3.86667	5.13333	4.71	4.86	4.18333	3.67667	4.38	4.08	3.88	4.31333	4.46	4.13333	4.4	3.83667	3.85	3.72	3.47333	3.66	3.64667	3.85	4.43	3.92333	4.24333	3.77667	4.6	4.38	3.735	3.71667	4.02333
220813_at	CYSLTR2	cysteinyl leukotriene receptor 2	5.28667	5.32667	4.84	5.09	4.875	4.965	5.02	5.1525	4.66	5.17333	5.04667	4.96	5.09	5.21	5.03333	4.99	5.28667	5.12	5	5.24	4.975	5.115	5.18333	5.14667	5.16	4.97	5.12	5.02667	5.14	5.03	5.03	5.2	5.19333	5.05333	5.19667	4.99	4.76333	5.25	5.24	5.37667	5.55667	5.01	5.43	4.81	5.08	5.19333	5.04333
215937_at	PTGDR	prostaglandin D2 receptor (DP)	3.45667	3.62333	3.54	3.58	3.415	3.44	3.48	3.4275	3.27667	3.35667	3.47667	3.43	3.295	3.55	3.19	3.29667	3.42333	3.21667	3.25667	3.17667	3.425	3.49	3.42	3.25333	3.31667	3.11	3.35	3.23	3.21	3.30333	3.51	3.28667	3.45	3.43333	3.28	3.72	3.48667	3.54667	3.46	3.35667	3.36667	3.53333	4.02	3.96	3.505	3.56	3.64667
208243_s_at	CNR1	cannabinoid receptor 1 (brain)	4.38667	4.26333	4.54	4.33	4.575	4.77	4.51	4.6125	4.54333	4.66	4.22333	4.75	4.705	4.4	4.08667	4.55	4.55667	4.35333	4.15	4.30333	4.36	4.86	4.3	4.31667	4.18333	4.87	4.38333	4.15667	5.14	4.17333	4.22	4.11333	4.46667	4.38667	4.34	4.18	4.7	4.93333	4.3	4.21	4.39667	4.30667	4.73	4.87	4.375	4.78667	5.08333
207940_x_at	CNR1	cannabinoid receptor 1 (brain)	4.46	4.32667	4.58	4.52	4.72	4.845	4.61	4.655	4.41667	4.74	4.57667	4.48	4.865	4.61	4.32667	4.63333	4.62333	4.48	4.61	4.33333	4.38	4.925	4.50333	4.68333	4.41667	4.81	4.65	4.44	5.14	4.23	4.22	4.47333	4.52667	4.61	4.47667	4.44333	5.06333	4.92667	4.41	4.41	4.48667	4.46	4.59	4.2	4.275	4.83333	4.69
205814_at	GRM3	glutamate receptor, metabotropic 3	10.0767	8.82	9.09	9.48	8.51	8.92	8.91	9.86	8.03333	8.50667	8.92	8.86	9.07	9.10333	9.37333	9.11333	8.98333	8.97	9.24667	8.7	7.43	8.115	9.05333	9.08667	8.32667	7.31	8.37667	9.55667	7.52	8.76	8.36	9.56667	9.65333	8.24	4.43667	4.54667	4.48	4.58333	4.83	4.43	4.42667	4.87	4.96	4.05	4.305	4.23667	4.43
1559634_at	CHRM3	cholinergic receptor, muscarinic 3	3.46	3.76	3.61333	3.74	3.97	3.46	3.44	3.4775	3.78	3.7	3.35333	3.86	3.695	3.70333	3.49333	3.61667	3.57333	3.51333	3.63333	3.63667	3.96	3.895	3.36667	3.57667	3.53667	3.81	3.55667	3.53333	3.71	3.61333	3.93	3.53	3.37667	3.53333	3.38667	3.52	3.51333	3.69333	3.81	3.46667	3.61	3.48667	3.9	3.94	3.475	3.69333	3.55
204038_s_at	EDG2	endothelial differentiation, lysophosphatidic acid G-protein-coupled receptor, 2	7.22333	6.82667	7.36333	8.23	8.42	8.525	7.77	7.2275	7.71	7.97333	8.05333	7.18	8.22	7.05667	7.60667	7.17667	7.16667	7.42667	7.82	7	7.57	8.24	7.67333	7.68333	7.38	6.01	6.34333	7.28333	6.43	7.12	7.31	8.13667	7.63667	7.91333	7.13333	6.75333	7.03333	6.72	6.71	6.63667	6.84333	6.71333	7.07	7.15	6.76	6.59667	7.14333
224408_at	MCHR2	melanin-concentrating hormone receptor 2 /// melanin-concentrating hormone receptor 2	5.23	5.07667	5.22333	5.34	5.265	5.585	5.08667	5.2825	5.07	5.23333	5.23667	5.7	5.91	5.40333	5.36667	5.38667	5.37	5.22	5.03333	5.07667	5.21	5.43	5.14333	5.08333	5.18667	4.9	5.14	5.33333	5.31	5.13667	5.25	4.96333	5.15333	5.10333	5.13	5.05333	5.12667	5.33	5.04	5.19333	5.14	5.25667	5.29	5.27	5.03	5.17667	5.27667
214613_at	GPR3	G protein-coupled receptor 3	5.98333	5.86667	6.15667	5.97	6.265	6.135	6.02333	6.13	6.29667	6.21667	5.92667	5.75	5.86	6.07667	5.75333	6.09333	6.00333	6.09667	5.89	6.18667	6.555	6.445	5.87667	6.10667	5.94333	6.26	5.86333	5.78	6.3	5.88	6.13	5.87333	5.95333	5.89333	5.71	5.65	5.70667	6.07667	6.05	6.21333	6.35	5.69667	6.2	5.9	5.885	5.90333	5.97333
217308_at	OR1F2	olfactory receptor, family 1, subfamily F, member 2	4.73667	4.75333	4.66667	4.52	4.495	4.64	4.82	4.91	5.01	4.92667	4.88333	4.6	4.835	4.8	4.48667	4.67	4.64	4.74667	4.65	4.78333	4.73	4.62	4.64333	4.68667	4.68333	5	4.84333	4.48667	4.86	4.77333	5.01	4.74333	4.72	4.73667	4.61667	4.59	4.79333	4.82667	4.92	4.74	4.87	4.98667	5.5	4.91	4.59	4.88667	4.89
1568934_at	CX3CR1	chemokine (C-X3-C motif) receptor 1	5.45667	5.80333	5.09667	4.84	5.355	5.655	6.56667	5.61	4.97333	5.33333	6.63333	4.49	4.695	5.92333	5.87	5.21667	5.27333	5.73333	6.46	5.48667	4.73	5.12	6.16333	6.59333	5.62667	4.75	4.77667	5.66667	4.58	6.05333	5.59	7.45667	6.59667	6.02333	4.65	4.91	4.05	4.55333	4.66	4.30333	4.36667	4.44667	5.03	4.86	4.46	4.38333	4.36
1552501_a_at	GPBAR1	G protein-coupled bile acid receptor 1	5.29333	5.21667	5.4	5.36	5.415	5.325	5.36333	5.2475	5.05	5.26	5.45667	5.19	5.38	5.53333	5.21333	5.52	5.45333	5.28667	5.39667	5.21333	5.23	5.4	5.29333	5.5	5.22333	5.47	5.37333	5.19667	5.65	5.14333	5.19	5.24667	5.36	5.39333	5.18667	5.15667	5.40667	6.07667	5.5	5.42667	5.56333	5.60333	5.79	5.87	5.35	5.91667	6.06
208525_s_at	OR2F1 /// OR2F2	olfactory receptor, family 2, subfamily F, member 1 /// olfactory receptor, family 2, subfamily F, member 2	3.29333	3.16667	3.58	3.18	3.385	3.195	3.35333	3.0775	3.11667	3.27667	3.29	3.07	3.02	3.18333	3.04333	3.14	3.21667	3.15	3.24	3.20667	3.24	3.265	3.14	3.14333	3.07333	3.18	3.14667	3.06333	3.19	3.13	3.4	3.15333	3.14333	3.14	3.14667	3.09	3.26667	3.30333	3.18	3.09667	3.39	3.21667	3.37	3.14	3.03	3.24333	3.2
206277_at	P2RY2	purinergic receptor P2Y, G-protein coupled, 2	4.58667	4.85333	5.38	4.88	5.275	5.245	4.63667	4.86	5.22333	5.31667	4.71333	4.69	4.99	4.96333	4.41333	4.86667	4.69667	4.75333	4.65	4.87	5.275	5.37	4.74667	4.75	4.66	4.89	4.93	4.37	5.19	4.70667	5.03	4.55667	4.90667	4.57333	4.87	5.17667	5.11	5.31333	5.19	5.21	5.22	4.9	5.54	4.8	5.47	4.83	5.26
1555018_at	OR2C3	olfactory receptor, family 2, subfamily C, member 3	2.6	2.73	2.70333	2.62	2.625	2.655	2.65	2.705	2.54333	2.76	2.65333	2.62	2.52	2.65	2.48333	2.50667	2.52	2.69667	2.66	2.60333	2.925	2.66	2.61667	2.66667	2.50667	2.99	2.67333	2.60333	3.04	2.60333	2.51	2.54667	2.56	2.62333	2.7	2.74	2.58333	2.76	2.63	2.62667	2.65	2.61333	2.78	2.72	2.535	2.78667	2.70667
1552440_at	ADMR	adrenomedullin receptor	3.58333	3.79	3.96	3.68	3.94	3.75	3.54	3.8675	3.61333	3.65	3.67333	3.57	3.745	3.87667	3.60333	3.48333	3.81667	3.69	3.69667	3.54333	3.68	3.715	3.72	3.61	3.59333	3.99	3.86	3.59667	4.16	3.74333	3.67	3.62667	3.77667	3.57	3.63	3.77667	3.93333	3.86	3.65	3.62	3.6	3.69333	4.39	3.87	4.13	3.66333	4.10333
206250_x_at	AVPR1A	arginine vasopressin receptor 1A	4.88	4.97	5.33	5.24	5.44	5.18	4.88667	4.98	5.07667	4.91333	5.01667	5.15	5.28	4.98333	4.76667	5.03667	4.91333	5.00667	5.01333	4.71667	5.135	5.365	4.99333	4.99	4.77667	5.25	5.24	4.91	5.14	4.83333	5.19	4.96667	4.82667	4.83667	5.11	5.03667	5.44	5.54667	5.81	5.06333	5.20333	5.37667	5.71	5.25	5.135	5.43	5.61333
221327_s_at	OPN1MW /// OPN1LW /// LOC653368	opsin 1 (cone pigments), medium-wave-sensitive (color blindness, deutan) /// opsin 1 (cone pigments), long-wave-sensitive (color blindness, protan) /// similar to Green-sensitive opsin (Green cone photoreceptor pigment)	4.7	4.66667	4.73667	4.83	4.635	4.645	4.62	4.7025	4.67	4.8	4.60667	4.67	4.42	4.81	4.50333	4.51	4.63667	4.55	4.55	4.64	4.7	4.77	4.56667	4.44	4.46667	4.68	4.60333	4.41333	4.93	4.59333	4.43	4.48	4.62333	4.47	4.29	4.48	4.66	4.67	5.3	4.56333	4.63333	4.83	4.95	4.9	4.46	4.45667	4.79333
237559_at	GPR55	G protein-coupled receptor 55	3.95667	3.99333	4.12333	4.12	4.47	4.285	3.81667	3.9925	4.14	4.21	3.89667	3.92	3.83	3.87667	3.63	3.80667	3.78333	4.12667	3.71333	4.03667	4.215	4.6	3.93	3.82333	3.75	4	3.7	3.76333	3.99	3.72333	3.86	3.85	3.89333	3.52333	3.7	3.76333	4.02333	3.95333	4.14	3.98333	4.15	3.76333	4.35	4.08	3.98	3.97333	4.5
206586_at	CNR2	cannabinoid receptor 2 (macrophage)	5.70667	5.27333	5.93	5.59	5.825	5.805	5.96333	5.61	5.43333	5.83	5.75	5.51	5.815	5.49	5.39	5.5	5.75333	5.63	5.23667	5.67	5.855	5.52	5.47333	5.70667	5.35	5.55	5.71333	5.29333	5.98	5.33667	5.48	5.39	5.49667	5.46667	5.53667	5.22	5.57	5.97	5.86	5.86667	6.05667	5.47667	6.15	5.61	5.63	5.76667	6.13333
208111_at	AVPR2	arginine vasopressin receptor 2 (nephrogenic diabetes insipidus)	5.25333	5.42333	4.96667	5.51	4.675	5.335	5.04333	5.525	4.88333	4.59667	5.05	5.45	5.15	5.44667	4.85667	4.97333	5.11	5.20333	4.95333	5.23333	4.89	4.97	5.24667	4.9	4.95667	5.75	5.17	4.89	5.51	5.14333	5.69	5.04	5.37667	4.76667	4.79333	4.77333	5.45667	5.46333	5.51	5.27667	5.59	5.47667	6.34	5.6	5.465	5.72667	5.30667
221464_at	OR1D2	olfactory receptor, family 1, subfamily D, member 2	5.53	5.55333	5.54333	5.68	5.775	5.64	5.76333	5.505	5.52	5.52667	5.54333	5.54	5.52	5.56667	5.42333	5.40667	5.66667	5.59667	5.39667	5.72	5.835	5.715	5.54667	5.65667	5.66667	5.62	5.37333	5.30667	5.77	5.52333	5.78	5.48	5.6	5.59333	5.33333	5.23333	5.24667	5.65333	5.86	5.90333	6.13333	5.51	5.75	5.41	5.545	5.66333	5.67
206971_at	GPR161	G protein-coupled receptor 161	5.36	5.13333	5.12	5.3	5.37	5.21	5.22	5.24	5.52667	5.27	5.15333	5.29	5.13	5.16333	5.22333	5.09667	5.07333	5.04333	5.02667	5.26	5.26	5.295	4.97	5.11	5.13	5.35	5.15	5.13	5.69	5.06	5.26	5.02333	5.23333	5.02333	5.62333	5.15667	5.16	5.33667	5.17	5.15	5.13	5.36	5.86	5.5	5.1	5.19667	5.30333
225127_at	GPR178	G protein-coupled receptor 178	8.90333	8.38333	8.24	8.56	7.82	8.1	8.04667	8.185	7.47333	7.36667	7.89333	8.84	8.75	8.31667	8.69333	8.87333	8.72667	8.82667	8.15667	8.32	7.76	7.68	8.64	8.06	8.55667	7.26	7.26	8.88	6.99	8.68333	8.03	8.39	8.41333	8.31667	7.78	8.27333	7.92667	7.3	6.9	7.52667	6.62333	9.09333	7.17	8.91	8.295	7.63	7.37
1557453_at	CMKOR1	Chemokine orphan receptor 1	4.48667	4.43333	4.94	4.5	5.31	5.275	4.41333	4.395	4.73	4.95667	4.41333	4.33	4.43	4.39333	4.16667	4.3	4.44	4.12	4.32333	4.52	4.84	5.135	4.45333	4.53	4.26667	4.43	4.22	4.14667	4.52	4.31667	4.54	4.4	4.53667	4.52333	4.34	4.36667	4.63667	4.85333	4.96	4.73	4.73667	4.54	4.87	4.18	4.32	4.66667	4.61
206331_at	CALCRL	calcitonin receptor-like	5.17667	5.08333	4.51	5.41	5.025	4.535	5.59333	4.9675	4.88333	4.52667	5.70333	5.07	5.205	5.31667	5.07	5.04	5.25333	5.32	4.98667	5.39333	4.98	4.78	5.28	5.55	5.37667	5.09	5.30333	5.19	5.29	5.32667	4.98	5.40667	5.50333	6.13333	5.75	5.16667	5.41667	5.9	6.33	6.11333	5.92333	5.55	6.34	6.17	5.655	6.83667	6.52
204036_at	EDG2	endothelial differentiation, lysophosphatidic acid G-protein-coupled receptor, 2	9.31333	8.68	9.28	11.12	10.665	10.86	10.1267	9.4775	9.78667	10.14	10.6467	8.99	9.885	9.31333	10.08	9.16	8.85667	9.53667	10.2833	9.57	9.54	9.95	10.37	10.3367	9.56	5.87	7.46333	10.0533	6.99	9.90667	9.28	10.9233	10.6433	10.31	9.54333	9.56667	8.87333	7.97333	6.13	7.53333	6.28	8.95667	8.39	8.19	8.1	7.35333	7.65667
221966_at	GPR137	G protein-coupled receptor 137	7.18	7.15	6.52333	6.93	6.575	6.64	7.10667	7.24	6.4	6.70333	7.03667	6.82	6.85	7.17333	6.90333	7.09667	6.94333	7.17333	6.84667	7.20333	6.755	6.715	6.95	6.98	6.98333	7	6.86333	6.79667	6.84	7.05	7.06	6.88	6.86	6.92333	6.90667	6.76333	6.38667	6.92333	7.24	6.75333	7.18333	6.52333	7.26	6.67	6.71	6.77667	6.87333
206437_at	EDG6	endothelial differentiation, lysophosphatidic acid G-protein-coupled receptor, 6	6.57	6.60667	7.12667	6.68	7.045	7.2	6.45667	6.715	6.79667	7.11333	6.54333	6.59	6.565	6.56	6.21333	6.30667	6.40333	6.67	6.29	6.71333	7.415	7.26	6.62	6.33333	6.54667	6.77	6.37333	6.3	6.46	6.58333	6.78	6.39667	6.39	6.29333	5.97	6.37667	6.58667	6.72333	6.98	6.48333	6.98	6.55667	7.22	6.58	6.79	6.54667	6.93333
219327_s_at	GPRC5C	G protein-coupled receptor, family C, group 5, member C	6.48667	6.48	6.40333	6.61	6.635	6.69	6.54333	6.635	6.87	6.69	6.52667	6.46	6.13	6.47667	5.9	6.23	6.16333	6.17	6.44333	6.39333	6.62	6.3	6.44333	6.46333	6.47333	8.1	7.89333	5.97	7.67	6.57667	7.05	6.29333	6.2	6.52667	6.64	7.22333	7.38333	7.27333	6.85	6.83	6.96	6.21667	6.53	6.95	6.35	6.43333	6.41667
206187_at	PTGIR	prostaglandin I2 (prostacyclin) receptor (IP)	6.06333	6.10667	6.17333	6.25	6.085	5.935	5.96333	6.25	5.8	6.01667	5.91667	5.87	6.085	6.23	5.90333	5.95	5.96667	6.05333	5.84333	5.93667	5.835	6.36	5.83333	6.23333	5.98	6.64	6.05333	5.83333	6.58	5.92333	6.32	5.91667	5.96333	6.07	6.47333	6.32	7.50667	6.82667	6.32	6.28333	6.22667	7.07667	7.23	7.65	6.21	6.57	6.42
221329_at	OR52A1	olfactory receptor, family 52, subfamily A, member 1	5.58	5.53667	5.72	5.52	5.315	5.31	5.70333	5.61	5.35	5.49667	5.33	5.21	5.43	5.37667	5.07667	5.20667	5.68	5.45333	5.2	5.48667	5.47	5.49	5.44333	5.72	5.43667	5.72	5.44667	5.29333	5.59	5.39333	5.42	5.31667	5.24667	5.38	5.48667	5.20667	5.24	5.71333	6.02	5.88	6.15	5.28	5.69	5.69	5.175	5.54333	5.73333
203706_s_at	FZD7	frizzled homolog 7 (Drosophila)	5.68333	5.62333	5.45333	4.29	4.455	4.34	4.42333	4.7575	3.94333	4.17333	5.20333	4.52	4.56	4.43333	4.31	4.35	4.51333	6.32333	4.38	4.37	4.13	3.99	4.9	4.86667	4.80667	9.04	9.02	4.43667	8.74	5.21	5.65	4.30667	5.2	5.60667	8.21667	8.07667	7.79333	6.37667	8.01	7.71667	7.15667	7.58	6.57	7.61	7.22	7.80333	6.02333
239452_at	CCBP2	Chemokine binding protein 2	5.22333	5.31333	5.34667	5.19	5.395	5.325	5.60333	5.3425	5.24333	5.32667	5.58	5.15	5.395	5.49333	5.02667	5.19	5.57	5.37	5.24667	5.22333	5.33	5.225	5.30333	5.55667	5.30667	5.37	5.34	5.18333	5.24	5.26667	5.29	5.26667	5.49333	5.31	5.33	5.24333	5.31	5.77	5.15	5.23	5.13333	5.67	5.29	6.05	5.295	5.56	5.56
1553078_at	OR5P3	olfactory receptor, family 5, subfamily P, member 3	3.6	3.51	3.74	3.9	4.005	4.19	3.86667	3.8025	3.58333	3.98667	3.82	3.59	4.025	3.88	3.58667	3.89333	3.88333	3.64667	3.71333	3.66	4.05	4.28	3.66	3.80667	3.65667	3.97	3.86333	3.63	3.97	3.60667	3.63	3.82333	3.80667	3.79	3.69667	3.74667	3.67667	4.20333	3.51	3.62333	4.00667	3.68	3.65	3.83	3.665	3.87667	3.99333
226690_at	ADCYAP1R1	Adenylate cyclase activating polypeptide 1 (pituitary) receptor type I	8.74667	9.46	8.15	7.9	8.565	8.3	9.16333	8.4	8.33667	8.59	8.57667	8.48	7.9	8.53	8.44667	8.38333	8.70333	8.73333	9.01667	9.22667	7.65	7.355	8.94	9.09333	9.43	7.35	8.07667	8.68667	7.87	9.06667	8.41	8.16333	8.32333	9.02333	5.78333	5.70667	5.53333	6.43667	5.6	5.99667	6.27667	5.75667	5.88	6.07	5.295	6.90667	6.07667
1555219_at	RGR	retinal G protein coupled receptor	5.19333	5.23667	5.22333	5.1	5.225	5.175	5.11333	5.03	5.2	5.12667	5.19333	4.7	4.875	5.06667	5.06	4.96333	5.14667	5.1	4.76333	5.06	5.045	5.015	5.04	5.11333	4.80333	5.03	5	4.88667	5.18	4.89667	4.91	4.93333	5.03667	5.03667	4.84667	4.89	4.81667	5.18	5.39	5.01333	5.37	4.96667	5.19	4.87	4.76	4.80333	5.01667
204452_s_at	FZD1	frizzled homolog 1 (Drosophila)	4.30667	3.98667	3.92667	3.71	4.065	3.695	4.11	3.8725	3.61	3.78667	4.06	3.8	3.86	3.70667	3.65	3.94667	3.86	4.04	3.79333	3.77	4.46	4.145	3.78667	3.92667	3.83	4.42	4.04	3.67667	4.44	3.69333	3.85	3.90667	3.69333	4.16333	4.78667	3.98667	5.12	4.27667	4.95	4.87667	4.77667	4.24	4.72	4.14	4.305	3.97333	4.36667
223873_s_at	VN1R3	vomeronasal 1 receptor 3	2.99	2.67333	2.95333	2.8	2.9	2.935	2.74333	2.93	3.1	2.95667	2.89	2.86	2.75	2.77333	2.73667	2.67	2.76	2.82333	2.59	2.82333	3.115	2.94	2.74667	2.79	2.67	2.96	2.75333	2.76333	2.78	2.76667	2.8	2.77667	2.77333	2.65667	2.66667	2.76333	2.89667	2.81333	2.78	2.72667	2.74667	2.79	3	3.08	2.84	2.83	2.84333
205458_at	MC1R	melanocortin 1 receptor (alpha melanocyte stimulating hormone receptor)	6.23667	5.98333	6.34333	6.16	6.115	6.09	5.85333	6.37	5.71667	5.95	5.76333	5.61	5.625	5.92	5.52667	5.75667	5.61333	5.95	5.74	6.25	6.4	6.23	5.91	5.75667	5.61	6.39	6.1	5.52333	6.23	5.88333	5.82	5.63	5.72333	5.54333	5.68	5.50333	5.68333	6.23	6.55	6.07	6.33333	5.88333	6.47	6.23	5.97	5.90667	5.97333
207360_s_at	NTSR1	neurotensin receptor 1 (high affinity)	5.59	5.96667	5.77667	5.14	5.815	5.75	6.54	5.61	6.32	6.56	5.61333	5.88	5.695	5.8	5.31333	5.59333	5.6	5.45	5.63667	5.66	5.63	5.74	5.66333	5.97667	5.43667	5.54	5.33	5.41	6.04	5.48333	5.33	5.58333	5.60667	5.40667	5.44	5.44667	5.69667	5.84667	5.61	5.49333	5.55	5.64667	5.77	5.7	5.46	5.62667	5.65667
230674_at	LGR4	Leucine-rich repeat-containing G protein-coupled receptor 4	4.46	4.39667	4.24	4.37	4.145	4.12	4.28667	4.55	4.31	4.37333	4.37667	4.43	4.46	4.42667	4.02667	4.15333	4.1	4.46	4.21333	4.35667	4.71	4.37	4.31333	4.04667	4.21333	4.69	4.02333	4.16333	4.5	4.26333	4.45	4.13667	4.14333	4.03667	3.94	4.07333	4.34333	4.50333	4.55	4.38667	4.58	4.28	4.99	4.42	4.26	4.21333	4.26
207055_at	GPR37L1	G protein-coupled receptor 37 like 1	6.02333	5.62	4.99667	5.28	5.245	5.125	5.71333	5.6875	5.34	5.45667	5.84333	5.44	4.885	5.67667	5.07667	5.44667	5.73	5.50667	5.42	5.01333	5.24	5.23	5.29333	5.09	5.22	5.14	5.35667	5.22333	4.81	5.06	5.32	4.91667	5.93333	6.03	5.34	5.4	4.70333	4.83667	4.43	4.55667	4.66333	4.94	5.02	4.83	4.65	4.50333	4.84667
223939_at	SUCNR1	succinate receptor 1	3.82667	4.19667	4.15	4.2	4.17	4.165	4.46333	4.395	3.78333	3.93667	4.36	3.73	3.845	4.18	3.95667	4.04	4.26	4.04667	4.23333	4.28	3.885	4.01	4.41333	4.19	4.34667	4.09	3.83333	3.79667	4.21	4.03333	3.69	4.43333	4.08333	4.25333	3.97667	3.92	4.27	4.42667	4.11	4.62333	4.16333	4.44333	5.73	4.71	5.305	5.92667	5.69333
210375_at	PTGER3	prostaglandin E receptor 3 (subtype EP3)	2.54667	2.54	2.56	2.54	2.73	2.565	2.45	2.5875	2.61	2.46667	2.44667	2.67	2.56	2.47667	2.42667	2.58333	2.56333	2.58333	2.51667	2.53333	2.835	2.65	2.51	2.46667	2.45667	2.64	2.60667	2.51667	2.63	2.54667	2.53	2.48	2.52667	2.45	2.47333	2.46	3.73	2.91	2.68	2.53333	2.59	2.93333	2.49	3.33	4.195	5.30667	5.04
214655_at	GPR6	G protein-coupled receptor 6	8.61	4.25	7.85333	3.38	5.515	4.39	3.42333	8.4025	3.40333	3.80333	3.34	4.43	4.37	3.86	3.78667	3.85333	4.28667	3.52667	3.30333	3.39	3.395	3.445	3.21667	3.28667	3.35333	3.62	3.46333	3.93	3.49	3.57	3.79	3.19667	3.4	3.34333	3.35	3.15333	3.52	3.55	3.14	3.25333	3.34	3.15	3.71	3.48	3.315	3.45667	3.64667
218151_x_at	GPR172A	G protein-coupled receptor 172A	6.75	6.70333	6.85333	6.95	6.85	6.8	6.70667	6.85	6.87	6.91	6.82333	6.81	6.59	6.86667	6.53	6.90333	6.68667	6.86	6.96	6.85333	6.71	6.695	6.67667	6.74333	6.70333	7.07	7.15667	6.69333	7.27	6.90667	6.65	6.78333	6.89667	6.77333	6.75	7.05667	6.82	7.12333	6.61	6.56333	6.69	7.06	7.08	7.26	7.445	6.99333	7.17667
232716_at	EDG2	Endothelial differentiation, lysophosphatidic acid G-protein-coupled receptor, 2	6.64	6.19333	6.54333	6.92	6.67	7.265	6.74	6.4775	6.34	6.37667	7.01333	6.1	6.255	6.39667	6.94333	6.12	6.17333	6.73	7.19333	6.70333	6.095	6.275	6.85	7.05	6.38333	5.77	5.86667	6.85667	5.72	6.59667	5.93	7.14333	7.66	6.78	7.54333	7.57	7.04667	6.04667	5.9	6.27	5.83667	6.65333	6.28	6.75	6.815	5.75333	6.35
206454_s_at	RHO	rhodopsin (opsin 2, rod pigment) (retinitis pigmentosa 4, autosomal dominant)	4.23	4.41667	4.50333	3.92	4.905	5.05	4.32667	4.3775	4.37	4.87	4.1	4.32	4.335	4.39667	4.15	4.28667	4.45	4.09333	4.17	4.08333	4.575	5.075	4.16	4.24	4.10333	4.41	4.01667	4.13667	4.13	4.28	4.31	4.19	3.98667	4.07667	3.92	3.85	4.09667	4.15667	4.97	4.32333	4.67333	4.03	4.41	4.21	4.07	4.26667	4.27
1561507_at	FFAR1	Free fatty acid receptor 1	3.05333	2.97333	3.35	3.39	3.345	3.095	3.16667	3.025	3.34333	3.52333	3.47333	3.08	3.155	3.17	3.21667	3.21	3.03667	3.03333	3.45	3.00333	3.405	3.29	2.97667	3.26333	2.99	2.96	3.04667	2.99667	3.2	3.17667	3.53	3.36333	3.48667	3.30667	2.95	3.00667	3.09667	3.21667	2.99	3.01667	3.12	2.93	3.22	3.02	3.105	3.14333	3.15
210773_s_at	FPRL1	formyl peptide receptor-like 1 /// formyl peptide receptor-like 1	3.96667	3.99333	4.46667	4.12	4.315	4.565	4.22667	4.0425	4.21333	4.27	4.13333	4.04	4.215	4.11	3.86333	4.10333	4.08667	3.67	3.82667	3.92333	4.705	4.05	3.92333	3.95	3.92	4.49	4.03667	3.69333	4.54	3.98333	4.25	3.96333	4.01667	4.03667	4.00333	4.05333	4.26333	4.37667	4.37	3.84667	4	4.04	4.28	4.16	3.905	4.22	4.27
210960_at	ADRA1D	adrenergic, alpha-1D-, receptor	4.04667	3.91667	4.11333	3.89	3.93	3.89	3.93667	3.9475	3.92667	4.01333	3.80667	3.83	3.85	4.06333	3.71333	3.92333	3.81333	4.22	3.85333	4.23333	4.305	4.33	3.71333	3.82	3.76	3.98	3.82667	3.82	4.09	3.81	3.92	3.76	3.72667	3.80667	3.77333	3.66667	4.24667	4.05333	4.14	3.88333	3.99667	4.00333	4.13	4.04	3.94	3.82333	3.79333
217262_s_at	CELSR1	cadherin, EGF LAG seven-pass G-type receptor 1 (flamingo homolog, Drosophila)	2.86667	3.05333	3.50333	3.27	3.3	3.77	2.99	3.1775	3.25667	3.42667	3.09333	2.98	3.12	3.22333	3	3.12667	2.85	3.07333	3.07	3.02	3.395	3.445	2.97	3.04333	2.95333	3.2	3.03667	2.98333	3.05	3.08667	3.35	2.98	3.11667	2.99333	3.06	3.09667	3.66	3.55667	3.21	3.22333	3.2	3.18	3.59	3.38	3.205	3.3	3.81333
221330_at	CHRM2	cholinergic receptor, muscarinic 2	4.23	4.42	4.43	4.24	4.45	4.42	4.68333	4.3125	3.99	4.21667	4.30333	4.31	4.675	4.32	4.14	4.34667	4.58	4.40667	4.14667	4.60333	4.64	4.33	4.31667	4.39	4.46667	4.35	4.38333	4.12	4.38	4.08667	4.38	4.16667	4.26667	4.36333	4.26	4.08333	4.28667	4.59333	5.3	4.89	5.08	4.22667	4.87	3.98	3.85	4.49667	4.22333
1556986_at	OR2H1	olfactory receptor, family 2, subfamily H, member 1	5.19667	5.01333	5.08667	5.2	4.835	4.915	5.32	5.08	4.98667	4.94333	5.38	4.92	5.5	5.17333	5.14	5.35	5.04667	5.03	5.05333	5.04667	5.215	5.055	5.08333	5.28	5.13	5.35	4.97	5.14	5.17	5.1	5.01	5.14333	5.43333	5.48667	4.99667	4.99667	5.01667	5.34	4.63	4.66667	4.79333	4.93333	5.01	4.76	4.8	4.97	5.18667
1553552_at	TAAR8	trace amine associated receptor 8	3.96	3.92	4.24667	3.61	3.975	3.91	3.96333	3.9975	4.28	4.04	4.06333	3.9	3.875	3.94333	3.72333	3.84	3.92667	3.92	3.81667	3.83667	4.065	4.09	3.93333	3.94333	3.86333	3.98	3.92333	3.70667	4	3.67333	3.93	3.75667	4.08667	3.87667	3.91	3.78	4.22	4.20667	4.1	3.70667	3.91667	3.72667	4.22	3.74	3.755	4.26333	3.97
221344_at	OR12D2	olfactory receptor, family 12, subfamily D, member 2	5.32333	5.29667	5.43333	5.06	5.485	5.155	5.36667	5.295	5.27	5.83333	5.16667	5.34	5.115	5.32667	5.06	5.11667	5.33	5.29667	5.17	5.57333	5.45	5.375	5.17667	5.19	5.36333	5.56	5.13333	5.06333	5.89	5.17	4.94	5.03667	5.26667	5.22667	5.19	5.12667	5.23333	5.42	5.72	5.47667	5.40333	5.4	5.71	5.44	5.14	5.13333	5.31333
221409_at	OR2S2	olfactory receptor, family 2, subfamily S, member 2	4.39667	4.44667	4.60333	4.68	4.49	4.635	4.47667	4.545	4.51667	4.56	4.35	4.48	4.815	4.66667	4.26	4.53333	4.58667	4.43	4.35333	4.43667	4.735	4.78	4.53	4.78	4.43667	4.55	4.39	4.27667	4.95	4.48667	4.41	4.41333	4.59667	4.57	4.62	4.53	4.67667	5.07	4.59	4.36	4.73	4.48	4.85	4.59	4.235	4.69667	4.81
211531_x_at	PRB1 /// PRB2	proline-rich protein BstNI subfamily 1 /// proline-rich protein BstNI subfamily 2	7.28333	7.43	8.14667	7.32	8.495	8.355	7.35333	7.63	7.7	7.95667	7.42333	7.44	7.21	7.38	7	6.97667	7.36	7.34333	6.86333	7.37	8.16	8.255	7.33333	7.34333	7.25333	7.09	7.06333	6.82667	7.41	7.23667	7.38	7.07333	7.16333	6.85333	7.04667	7.07667	7.02667	7.45667	7.86	7.57667	8.14333	7.53	8.06	7.2	7.25	7.31333	7.60667
203987_at	FZD6	frizzled homolog 6 (Drosophila)	4.31667	3.87333	4.27	4.4	4.015	4.2	4.79333	4.055	4.42	4.20667	5.12	4.18	4.235	3.94	4.37333	4.78333	4.06	4.1	4.00667	4.08333	4.485	4.115	4.78	4.33	4.88333	4.63	4.75333	4.19333	4.07	4.52333	4.62	4.33333	4.42667	4.94	5.13333	4.82	7.38	4.71	5.79	5.80333	5.80667	5.96	5.07	6.77	6.99	5.98667	6.46333
220642_x_at	GPR89A /// LOC653519	G protein-coupled receptor 89A /// similar to G protein-coupled receptor 89	6.8	7.12667	6.59	7.03	6.96	7.025	7.12667	6.5875	7.31333	6.86	6.93667	7.14	6.96	6.9	7.16	6.99	6.89	6.71	6.96333	7.13667	7.095	7.155	7.26667	7.05	7.54333	7.42	7.40333	7.21	7.79	7.3	7.94	7.21	7.11333	7.23333	7.8	7.31333	6.80333	6.56667	6.99	6.99667	6.71667	6.8	6.63	7.07	7.495	6.95667	7.15
242592_at	GPR137C	G protein-coupled receptor 137C	4.52333	3.95667	3.54	4.25	4.225	3.875	3.64667	3.8625	3.90667	3.44333	3.93333	4.82	5.1	4.02667	5.41333	4.85333	4.61333	3.44	3.83	4.37667	5	5.085	4.54	3.83333	4.69333	5.21	5.61	4.66667	5.02	3.84	5.25	4.60667	4.08333	4.67333	3.83667	3.20333	2.78	2.85667	3.11	3.05	2.93	2.68	2.82	2.84	2.66	2.91	2.70667
1553818_x_at	DKFZP434P211 /// LOC645017 /// LOC646074	POM121-like protein /// similar to POM121-like protein /// similar to nuclear pore membrane protein 121	4.12667	3.91667	4.09	4.31	4.095	4.48	4.05333	4.275	4.28333	4.22	3.96667	4.1	4.13	4.23	3.89333	3.79333	3.91333	4.09333	3.98667	4.15	4.41	4.23	3.98333	3.99333	3.94	4.06	3.91667	3.92	4.31	3.94333	4.35	3.99	4.04667	3.9	3.97	4.04667	4.26333	4.37	4.14	4.07667	4.16667	4.25667	4.28	4.06	4.015	4.06	4.17667
41660_at	CELSR1	cadherin, EGF LAG seven-pass G-type receptor 1 (flamingo homolog, Drosophila)	4.49333	4.5	4.55667	4.39	4.575	4.51	4.56	4.46	4.30667	4.59333	4.39667	4.21	4.325	4.31333	4.2	4.33667	4.42333	4.47	4.32	4.48667	4.64	4.495	4.33333	4.45333	4.43667	4.34	4.36	4.21	4.48	4.36333	4.43	4.29667	4.55	4.32	4.27333	4.19667	4.35	4.4	5.1	4.97333	5.01667	4.53333	4.61	4.46	5.44	4.61667	4.64667
221313_at	GPR52	G protein-coupled receptor 52	5.90667	5.18667	5.19333	5.53	4.935	5.3	5.71667	5.6725	4.65667	5.25333	5.18	5.16	5.315	5.19667	4.98	4.88	5.41333	5.27333	4.88	5.33667	4.795	5.06	5.30333	5.27667	5.42333	5.43	5.33667	4.92667	5.53	5.07333	5.08	4.97	5.36667	5.48	5.39	4.99667	5.23	5.79	5.33	5.11333	5.61333	5.44	5.68	5.52	5.05	5.74	5.47667
211919_s_at	CXCR4	chemokine (C-X-C motif) receptor 4 /// chemokine (C-X-C motif) receptor 4	5.46333	5.53333	5.43333	5.9	5.355	5.85	5.97	5.4075	5.55	5.71	6.98	5.74	5.87	5.47333	5.72	5.41333	5.22667	5.53	5.45	5.25333	5.655	5.555	6.14667	6.53333	5.9	5.68	6	5.44	5.85	5.77667	5.76	6.38	6.70333	6.93	7.43667	6.91333	6.87667	6.60667	6.02	6.77333	6.10667	5.85	7.06	8.08	8.17	7.83333	7.74333
220821_at	GALR1	galanin receptor 1	3.03667	3.56333	3.17667	3.06	2.995	2.955	3.11	3.245	3.11667	2.99	3.07	2.97	3.1	3.06333	3.11333	2.99	3.15667	3.08333	3.33	3.18	2.845	3.075	3.09333	3.03333	3.15333	3.04	2.90667	3.04667	3.26	3.23	3.36	3.02	3.08	3.04667	2.94333	3.05333	2.97667	3.07	3	2.92667	2.85667	3.14	3.19	2.8	2.99	2.88	2.94333
208556_at	GPR31	G protein-coupled receptor 31	5.54	5.24333	6.14667	5.54	6.28	5.945	5.58333	5.5125	5.99333	5.75	5.49333	5.67	5.51	5.33333	5.25	5.48667	5.29667	5.52667	5.27667	5.47	6.205	5.965	5.26667	5.35333	5.32333	5.4	5.22667	5.34667	5.41	5.34333	5.67	5.45667	5.45	5.32	5.09	5.12667	5.70333	5.78667	5.33	5.22667	5.71	5.47	5.88	5.45	5.455	5.19	5.96333
208016_s_at	AGTR1	angiotensin II receptor, type 1	3.30667	3.69333	3.61	3.64	3.845	3.44	4.75667	3.4825	4.69	4.60333	3.6	3.5	3.33	3.47333	3.14333	3.18333	3.47333	3.48667	3.26	3.41667	3.73	3.555	3.51	3.96	3.43333	3.5	3.61	3.20333	3.76	3.37	3.56	3.43667	3.48	3.59333	3.83	3.31	4.11333	4.27333	4.16	5.15	4.48667	3.94	4.63	5.56	4.265	5.28333	5.95
221461_at	TAS2R9	taste receptor, type 2, member 9	3.25667	3.28667	3.25333	3.01	3.25	3.235	3.22667	3.2175	3.38667	3.24333	3.26333	3.2	3.09	3.2	3.12333	3.13667	3.21667	3.26667	3.14333	3.28667	3.14	3.535	3.16333	3.22	3.23667	3.13	3.22333	3.16333	3.42	3.17333	3.4	3.07333	3.4	3.05	3.08333	3.02667	3.08667	3.43	3.44	3.25667	3.42	3.29	3.62	3.38	3.3	3.21	3.16667
242517_at	KISS1R	KISS1 receptor	5.21333	5.72667	5.29667	4.76	5.205	5.02	4.47333	5.155	5.70667	4.81667	4.08	4.62	5.095	4.63333	4.19333	4.42333	4.51667	4.58333	6.38333	5.05667	5.335	6.48	5.85333	4.77	6.68667	4.43	4.19	4.54333	4.32	6.1	6.66	5.07667	3.99	5.71	3.91667	3.89667	4.15333	4.17667	4.17	3.83333	4.06667	4.13667	4.43	4.32	4.34	3.94333	4.43667
211510_s_at	CRHR2	corticotropin releasing hormone receptor 2	3.36	3.06333	3.55667	3.21	3.48	3.44	3.27667	3.2825	3.43667	3.57	3.16333	3.01	3.295	3.39	3.17667	3.24333	3.15667	3.27667	3.15333	3.02333	3.53	3.53	3.10667	3.28333	3.10667	3.27	3.24	3.04	3.16	3.03333	3.29	3.24	3.21667	3.15667	3.12667	3.10333	3.25	3.42667	3.32	3.19333	3.23333	3.07333	3.52	3.33	3.195	3.34	3.35667
224116_at	GRM7	Glutamate receptor, metabotropic 7	3.44333	3.44	3.16	3.32	3.175	3.24	3.55333	3.3475	3.06333	3.03667	3.73667	3.12	3.235	3.31667	3.32667	3.27667	3.49667	3.47333	3.46	3.42667	3.35	3.325	3.43667	3.53667	3.48667	3.26	3.52667	3.39	3.36	3.37333	3.22	3.46667	3.44333	3.79667	3.22	3.01667	3.15667	3.31333	3.08	3.37	3.35333	3.17	3.53	3.12	3.155	3.40667	3.27333
221140_s_at	GPR132	G protein-coupled receptor 132	4.09333	4.17333	4.15667	4.62	4.215	4.07	4.01	4.315	4.10667	4.06667	4.14	4.35	4.37	4.33333	3.89333	4.18333	3.98667	4.16333	4.07667	4.02	3.955	4.43	4.05667	4.17333	3.97333	4.78	4.09	3.94333	4.5	4	4.45	4	4.3	4.04333	3.87333	4.02667	4.45333	4.13667	4.48	4.01667	4.22667	4.34333	4.92	4.27	4.395	4.22667	4.48
210939_s_at	GRM1	glutamate receptor, metabotropic 1	4.46333	4.65333	4.84333	4.66	4.98	4.92	4.54667	4.8325	4.68667	4.73	4.40667	4.41	4.795	4.72333	4.62333	4.48	4.81667	4.68	4.60667	4.61333	4.82	5.35	4.48	4.49667	4.49667	5.04	5.31333	4.68	5.23	4.50667	4.95	4.67667	4.58333	4.54333	4.42333	4.57333	4.71667	4.71	4.92	4.57667	4.60667	4.68333	5.06	4.54	4.395	4.61333	4.8
211232_x_at	GLP1R	glucagon-like peptide 1 receptor	5.67667	5.9	6.21	5.93	5.98	6.14	5.8	5.885	6.06667	6.12333	5.84	5.62	5.835	5.94667	5.63	5.55	5.85	5.86	5.66	5.91333	6.155	5.935	5.83667	5.83	5.74	6.14	6.1	5.72333	5.98	5.72333	5.85	5.79667	5.88	5.87667	5.73667	5.71333	5.89667	5.99333	5.87	5.82	5.89	5.93667	6.12	5.94	5.775	5.92333	6.03
202154_x_at	TUBB3	tubulin, beta 3	10.1133	10.87	10.1133	9.38	10.38	10.605	10.8267	9.84	11.5633	11.24	9.31333	10.87	10.82	10.65	10.3167	10.9667	10.7933	10.3	11.23	11.1067	11.355	10.88	10.4633	10.55	11.3267	10.06	10.2867	10.8067	10.16	10.9933	11.61	10.2133	9.01333	10.6467	12.33	10.9567	8.58333	8.46333	8.39	8.37	7.92333	8.82333	8.63	8.12	8.68	8.05	8.97667
236860_at	NPY6R	neuropeptide Y receptor Y6 (pseudogene)	3.72	3.61667	3.76667	3.55	3.52	3.815	3.71333	3.8425	3.57667	3.72333	3.70667	3.59	3.57	3.8	3.59667	3.52333	3.60333	3.77	3.64333	3.76333	3.875	4.15	3.8	3.55667	3.63333	4.03	3.95	3.45667	4	3.55333	3.68	3.52	3.77	3.55	3.90667	3.68667	3.60667	4.14	9.4	8.22667	7.59667	4.01333	4.94	3.84	3.77	3.63333	3.62
1553549_at	VN1R2	vomeronasal 1 receptor 2	4.17667	4.27333	4.33333	4.61	4.185	4.235	4.39333	4.2525	4.33	4.21	4.41667	4.15	4.545	4.31667	4.06333	4.26	4.47333	4.43333	4.26667	4.25333	4.205	4.125	4.13333	4.45667	4.28	4.05	4.09667	4.16667	4.43	4.23333	4.51	4.16667	4.30667	4.34667	4.20333	4.17333	4.56	4.64333	4.43	4.25667	4.36	4.44333	4.33	3.97	4.17	4.46667	4.2
206002_at	GPR64	G protein-coupled receptor 64	4.1	4.05333	3.74667	4.39	4.16	3.885	4.22667	4.045	3.77667	3.83333	4.09667	3.9	3.93	4.04333	3.91	3.88333	4.18667	4.27333	4.06	4.01667	4.17	4.235	4.11	4.18667	4.15333	3.67	3.81	3.97	4.45	4.06667	3.79	4.16	4.04	4.22667	7.54	6.37	5.75667	4.86	4.37	4.74	4.44	4.82667	4.37	4.75	5.565	4.96667	5.41333
207927_at	HTR7	5-hydroxytryptamine (serotonin) receptor 7 (adenylate cyclase-coupled)	5.34667	5.64	5.43	5.43	5.47	5.365	5.14	5.6	5.33333	5.29333	5.01667	5.45	5.295	5.4	5.06	5.04667	5.31333	5.4	5.16667	5.37667	5.23	5.27	5.30333	5.22333	5.24	5.94	5.4	5.22	5.66	5.34333	5.64	5.07333	5.2	4.88667	5.08667	5.21333	5.59333	5.31667	5.97	5.27667	5.38667	5.61333	6.25	5.79	5.47	5.26667	5.29667
212950_at	GPR116	G protein-coupled receptor 116	6.29667	6.1	5.60333	6.27	6.075	5.935	6.74	6.1225	6.27667	6.14	6.77	6.6	6.175	6.02667	6.2	6.29667	6.42333	5.93667	6.00333	6.21333	6.195	6.17	6.94333	6.38333	6.49	5	5.07	6.52	5.32	6.26	6.03	7.09667	5.80333	5.95333	6.34333	6.34	6.43333	7.02667	8.2	8.47333	9.09333	7.03333	8.44	8.6	7.545	9.01333	8.56
234820_at	MAS1L	MAS1 oncogene-like	4.83667	4.97	4.52667	4.96	4.88	5.23	4.82667	4.87	4.76333	4.85667	4.77	5.01	4.875	4.86333	4.54667	4.59	4.67	4.87667	4.56667	4.84	4.74	5.425	4.80333	4.8	4.9	4.87	5.01333	4.62333	5.05	4.75667	4.88	4.79667	4.86333	4.79	4.77667	4.64667	4.83667	4.99333	5.23	4.95333	5.04333	4.88333	5.14	4.84	4.985	4.98	5.04667
207240_s_at	LHCGR	luteinizing hormone/choriogonadotropin receptor	3.1	3.07	2.99333	3.01	3.265	3.06	2.99667	2.995	2.99333	3.04667	3.06667	2.78	2.88	2.93667	2.9	2.80667	3.04	2.97667	2.93	2.99333	3.16	3.085	2.97333	3.07667	3.03333	2.98	2.93667	2.87333	2.94	3.1	2.9	2.94667	3.14667	3.03667	4.03	4.63	2.89667	3.19667	2.96	2.99667	3.14	2.91333	2.92	2.8	3.075	3.92	3.5
1568661_at	GNRHR	Gonadotropin-releasing hormone receptor	3.23333	3.26333	3.21	3.06	3.235	3.24	3.15667	3.085	3.63333	3.26	3.10667	2.95	2.94	3.15	3.33	3.24333	3.30333	3.14333	3.36667	3.25667	3.555	3.52	3.12	3.26667	3.14333	3.02	3.09667	3.11333	2.98	3.16667	3.02	3.05333	3.17333	2.99667	2.92333	3.05667	2.84667	3.11667	2.96	2.96	3	2.81667	2.84	2.97	2.98	2.81333	2.81667
211490_at	ADRA1A	adrenergic, alpha-1A-, receptor	3.39333	3.53	4.44667	3.62	4.27	3.99	3.48333	3.6125	3.96333	4.10667	3.54667	3.84	3.63	3.55333	3.4	3.52667	3.35333	3.45667	3.39333	3.48	4.47	4.37	3.46667	3.39667	3.48	3.28	3.49	3.22667	3.69	3.42333	3.85	3.37667	3.49	3.51667	3.22667	3.20667	3.55667	3.59667	3.82	3.39667	3.69667	3.5	3.89	3.52	3.395	3.36667	3.68333
231871_at	GPR180	G protein-coupled receptor 180	4.72	4.50333	4.53667	4.8	5.005	4.6	4.94667	4.85	4.70667	4.58333	5.28	4.89	4.595	4.5	4.84333	4.63333	4.61	4.79667	4.66667	5.17	4.63	4.56	4.85	4.85667	5.17667	4.43	4.9	4.89667	4.58	4.97	4.66	5	4.92	5.04333	5.06	5.11667	4.61333	4.86	4.19	4.45	4.38	4.70333	4.14	4.99	4.9	5.21	4.81667
221417_x_at	EDG8	endothelial differentiation, sphingolipid G-protein-coupled receptor, 8 /// endothelial differentiation, sphingolipid G-protein-coupled receptor, 8	4.18	3.61667	3.99	6.11	4.195	4.55	4.43	4.21	4.20667	4.25	5.00333	4.61	5.21	4.46	4.67667	4.45	3.87333	4.07667	4.88667	4.08	3.955	4.295	4.55667	4.82333	3.94667	4.02	4.18	4.52	4.27	4.27667	4.3	5.2	5.13667	4.74667	3.53667	3.67	4.05667	4.07667	3.65	3.64333	3.59	3.77	4.39	3.62	4.035	3.79	4.25667
1562337_at	OR7D2	olfactory receptor, family 7, subfamily D, member 2	3.49	3.58667	3.24	2.94	3.515	3.01	3.43	3.5525	3.23667	3.33	3.14333	3.52	3.22	3.49	3.66333	3.37	3.43	3.59667	3.76667	3.41	3.235	3.665	3.34333	3.61	3.7	3.23	3.53333	3.57	3.65	3.46	3.47	3.39	3.36	3.32333	3.47667	3.3	3.49667	3.51667	3.27	3.48	3.30667	3.54667	3.44	3.39	3.75	3.44333	3.46667
208508_s_at	OR2J2	olfactory receptor, family 2, subfamily J, member 2 /// olfactory receptor, family 2, subfamily J, member 2	3.10333	3.16667	3.40333	3.46	3.075	2.93	3.19	3.175	3.22	3.14	3.14333	3.03	3.085	3.05667	2.90667	2.96	3.01667	3.18	2.98667	3.24667	3.4	3.39	3.05333	2.92333	3.09333	3.21	2.99667	2.97333	3.3	2.98333	2.9	2.92667	3.05	3.01667	2.95	2.78333	3.06667	2.94667	3.43	3.26	3.40667	3.13667	3.02	2.86	2.88	2.92333	2.98333
244069_at	TACR2	Tachykinin receptor 2	5.28333	5.32	4.83333	4.4	3.985	4.745	4.71667	5.285	4.62667	4.40333	4.34	5.13	4.635	4.95	4.61	4.87	5.18667	4.90333	4.48	4.55	4.51	4.665	4.53333	4.6	4.64333	4.73	5.16	4.73333	4.94	4.61	4.68	4.23333	4.32667	4.38	6.35333	5.21	4.68	5.02333	5.3	5.49667	5.21	4.65	5.06	4.33	4.41	4.44667	4.5
209990_s_at	GABBR2	gamma-aminobutyric acid (GABA) B receptor, 2	6.16667	9.64333	5.94667	6.85	7.02	7.5	8.09667	5.955	9.40667	8.80667	4.14	10.65	10.18	9.85	10.0333	10.6433	10.44	8.93667	8.80333	10.74	11.45	10.345	8.00667	7.58667	8.99	9.35	9.22333	10.1767	9.35	8.92	9.27	6.35667	4.56667	7.01667	8.23	7.82667	3.07333	3.24	3.61	3.27667	3.72	3.36667	3.26	2.92	3.255	3.17667	3.16
205638_at	BAI3	brain-specific angiogenesis inhibitor 3	7.91333	7.20667	7.23667	5.96	6.735	6.51	6.35	6.995	7.13333	6.61	5.71	8.28	7.92	6.85333	7.38333	7.94333	7.70333	6.90333	6.35	6.28	7.005	6.62	6.09333	5.65333	6.64	7.39	7.15667	7.64333	7.29	6.25	6.59	5.50333	5.34	5.89667	6.80333	6.20333	3.92333	3.79	2.98	3.82333	3.40667	3.51333	3.56	3.2	3.035	3.25333	3.08667
224290_at	VN1R3	vomeronasal 1 receptor 3	2.92667	3.17667	3.42	3.12	3.36	3.34	3.26333	3.15	3.24	3.09	3.13667	3.2	3.25	3.09	3.05333	3.08	3.16667	3.28667	3.16	3.09667	3.345	3.245	3.12333	3.24667	3.02333	3.09	3.21667	3.05333	3.29	3.1	3.34	3.05	3.2	3.07667	3.14667	3.19333	3.38333	3.31	3.27	2.96	3.15667	3.41333	3.15	3.2	3.155	3.25	3.14
1555212_at	OR8B8	olfactory receptor, family 8, subfamily B, member 8	5.1	5.23	5.45333	5.47	6.13	5.65	5.22	5.325	5.29	5.81333	5.44333	5.11	5.425	5.28	5.21	5.37	5.34	5.37667	5.41333	5.17333	5.48	6.02	5.18667	5.42333	5.20333	5.36	5.18667	5.17667	5.77	5.15667	5.22	5.33333	5.43	5.27	5.11667	5.13667	5.31667	5.44	5.61	5.31333	5.60333	5.20333	5.56	5.22	5.215	5.27333	5.54333
221324_at	TAS2R1	taste receptor, type 2, member 1	5.66333	5.65333	5.87333	5.82	5.86	5.91	5.92333	5.68	5.78333	5.73667	5.68333	5.54	5.75	5.67667	5.30333	5.61333	5.80333	5.57333	5.43667	5.69667	5.55	5.615	5.49	5.63333	5.59333	5.76	5.51333	5.32667	5.93	5.52333	5.42	5.59	5.54	5.45667	5.44667	5.39667	5.41667	5.72667	6.03	5.8	5.87333	5.34667	6.02	5.59	5.51	5.64333	5.80667
210381_s_at	CCKBR	cholecystokinin B receptor	5.26	6.75	5.38333	4.9	5.11	5.075	4.83333	5.475	5.20333	5.04	4.64667	6.43	6.77	6.41	5.75667	6.57	6.66333	5.46	4.68333	4.75	4.95	5.14	5.11667	4.69667	5.10667	6.1	5.90667	6.03	6.5	4.97333	5.9	4.57	4.7	4.65333	4.58667	4.47667	4.55	4.73333	5.29	4.96333	5.27333	4.48333	5.57	4.76	4.415	4.45333	4.52667
239396_at	GPR177	G protein-coupled receptor 177	6.19333	6.22667	5.66	5.91	5.905	5.75	6.46333	6.1225	5.39667	6.04333	6.32	5.78	6	6.12667	5.71	5.84	6.35	6.04333	5.88667	6.39667	6.13	5.925	6.02333	6.25667	6.13667	5.99	6.33333	5.67333	6.15	5.98333	5.95	5.96333	6.33	6.03	6.18667	5.99	5.76	6.28	6.36	6.27333	6.95667	6.15667	6.6	6.1	5.91	6.32	6.17667
224275_at	GPR98	G protein-coupled receptor 98	3.4	3.85333	3.67	2.82	2.92	2.735	2.71333	3.41	2.90333	2.72	2.76333	2.67	2.735	3.4	3.30333	3	3.31	3.78	2.57333	2.72667	2.875	2.555	2.57	2.78333	2.68667	2.94	2.89	3.51667	2.94	2.85333	2.77	2.53	3.13333	2.56	3.54	3.07333	2.65667	2.75	2.58	2.61333	2.6	2.70667	2.83	2.77	2.555	2.5	2.51667
203146_s_at	GABBR1	gamma-aminobutyric acid (GABA) B receptor, 1	9.91	9.95	10.5767	8.29	9.905	9.365	8.9	10.1475	9.33333	9.14	8.05667	9.5	9.13	9.68667	9.37667	9.55667	9.74333	9.51	9.61	10.3233	11.135	10.05	8.62667	8.71667	8.94	9.47	9.74	9.79	9.88	8.81	8.74	8.38	7.94333	8.34	8.45667	8.03333	7.89667	8.07333	6.31	7.53	7.43667	7.61333	6.6	6.75	7.105	7.28333	6.98333
206998_x_at	LOC648979	hypothetical protein LOC648979	5.20333	5.2	5.14	5.04	5.27	5.075	4.91333	5.335	4.67	4.88667	5.08333	5.07	4.57	4.99	4.52	4.62333	4.79667	4.94667	4.41667	4.87	5.34	5.02	4.88	4.63	4.72333	5.53	4.91	4.70333	5.36	5.20333	4.98	4.69667	4.66	4.52333	4.22	4.49667	4.63667	4.92667	5.45	4.88333	5.08	5.04667	5.58	4.86	5	4.68	5.07
244832_at	EDNRA	Endothelin receptor type A	3.62	3.65	3.56	3.85	3.75	3.775	3.77333	3.6625	3.54	3.74	3.68	3.45	3.69	3.71667	3.53667	3.53667	3.59333	3.65333	3.49	3.53	3.92	3.71	3.68	3.52667	3.76	3.99	3.72667	3.51667	3.86	3.63	3.78	3.53667	3.78333	3.56333	3.82	3.79	3.68333	3.86667	4.02	3.93667	3.79333	3.96333	4.16	3.79	3.535	3.78667	3.72333
241266_at	LGR5	Leucine-rich repeat-containing G protein-coupled receptor 5	3.31333	3.34333	3.54333	3.36	3.42	3.43	3.31	3.3625	3.53	3.69333	3.35667	3.56	3.28	3.33667	3.2	3.32333	3.43333	3.45667	3.25333	3.26	3.525	3.585	3.24	3.30667	3.24667	3.53	3.34333	3.21	3.56	3.31333	3.33	3.20667	3.29667	3.24667	3.14	3.16667	3.35	3.43	3.6	3.43	3.40667	3.33	3.91	3.51	3.32	3.31333	3.32333
207094_at	IL8RA	interleukin 8 receptor, alpha	5.56333	5.57	5.98	5.33	5.775	5.84	5.78	5.53	5.67667	5.89	5.82667	5.47	5.935	5.62	5.61333	5.67	5.74	5.63667	5.75	5.6	5.985	5.73	5.53333	5.86	5.53333	5.57	5.75667	5.50667	5.73	5.58	5.67	5.69	5.6	5.88667	5.78333	5.65667	6.01	6.20667	5.94	5.75667	5.96333	5.84333	6.24	5.61	5.665	5.86333	5.99
208537_at	EDG5	endothelial differentiation, sphingolipid G-protein-coupled receptor, 5	4.68	4.88333	4.85	4.84	4.97	5.005	4.58	4.76	5.01	5.31	4.71333	4.53	4.52	4.65	4.48	4.72333	4.67	4.89	4.66	4.66333	5.175	5.135	4.51	4.54667	4.48333	4.93	4.59	4.46333	5.22	4.58333	4.7	4.46667	4.61333	4.48333	4.45333	4.29333	4.56333	4.98667	5.48	4.68	4.97	4.66333	5.05	4.79	4.865	4.62	5.23333
206252_s_at	AVPR1A	arginine vasopressin receptor 1A	3.62333	3.73667	3.74	3.87	4.145	3.535	3.68	3.6	3.82667	3.62667	3.67333	3.79	3.585	3.89	3.49	3.57	3.54333	3.43	3.46333	3.63	3.565	4.035	3.50333	3.75667	3.45	4.01	3.68333	3.35	3.86	3.64667	3.65	3.54333	3.62333	3.62333	3.43333	3.62333	4.16667	4.33	3.67	3.58	3.89	3.72667	4.94	4.06	3.87	5.15667	3.99667
221299_at	GPR173	G protein-coupled receptor 173	4.31333	4.30667	4.62	4.39	4.815	4.66	4.34667	4.5125	4.73667	4.43667	4.41667	4.56	4.61	4.49	4.3	4.26667	4.33667	4.34667	4.56333	4.44	4.455	4.415	4.30333	4.15	4.38	4.23	4.36	4.27333	5.06	4.30333	4.03	4.26	4.15	4.27333	4.46333	4.38	4.62333	4.69	4.41	4.18	4.45333	4.46	4.85	4.46	4.285	4.52667	4.78333
211661_x_at	PTAFR	platelet-activating factor receptor /// platelet-activating factor receptor	6.39667	6.50667	6.57667	6.44	6.79	6.59	7.01667	6.585	6.33667	6.33333	7.13667	6.08	6.295	6.8	6.16333	6.08667	6.48667	6.69667	6.59667	6.55333	6.55	6.125	6.7	6.92667	6.75	6.06	6.4	6.21333	6.58	6.68	6.31	6.83667	6.85667	6.79333	6.60333	6.38667	6.38667	6.67333	6.55	6.45667	6.73667	6.32	6.66	6.56	6.745	6.36667	6.95667
1566288_at	OR2M4	olfactory receptor, family 2, subfamily M, member 4	3.19333	3.27	3.14	2.94	3.13	3.035	3.03	3.385	3.18667	3.18667	3.13333	3.1	3.25	3.17333	2.98333	2.94333	3.13667	3.09333	3.13667	3.01333	3.005	2.995	3.07333	3.21333	3.10333	3.49	3.17	3.10667	3.71	3.12	3.31	3.06	3.24	3.00667	3.15333	3.13	3.28	3.22	3.37	3.11333	3.11667	3.16667	3.6	3.66	3.08	3.3	3.46
211545_at	GHRHR	growth hormone releasing hormone receptor	4.62	4.26	4.55333	4.5	4.6	4.965	4.58667	4.6	4.67	4.84	4.72	4.57	4.62	4.51667	4.39	4.59333	4.37667	4.37333	4.46	4.37333	5.11	4.485	4.42	4.58333	4.35667	4.91	4.57333	4.3	4.84	4.38	4.59	4.38	4.43333	4.39333	4.37333	4.4	4.76	5	4.56	4.62333	4.70667	4.61333	4.87	4.74	4.44	4.93333	4.86667
243694_at	GPR125	G protein-coupled receptor 125	3.57333	3.48333	3.39	3.68	3.585	3.35	3.41333	3.45	3.36667	3.35667	3.68333	3.54	3.525	3.59667	3.25667	3.37667	3.51667	3.35333	3.38333	3.68	3.465	3.41	3.37	3.53	3.38333	3.51	3.49	3.34	3.49	3.36667	3.5	3.30667	3.45	3.53667	3.27	3.29333	3.34667	3.81	3.77	3.55	3.67333	3.40333	3.5	3.43	3.335	3.47333	3.75667
206887_at	CCBP2	chemokine binding protein 2	5.41667	5.36	6.11	5.17	5.725	5.635	5.48	5.35	5.46667	5.18333	5.21	5.05	5.43	5.48333	5.01333	4.94333	5.55333	5.43	5.13	5.30333	5.66	5.515	5.18333	5.56333	5.18	5.8	5.37	5.04	5.39	5.26333	5.38	5.05667	5.42	5.36	5.43333	5.30333	5.64	5.68	5.38	5.55667	5.57333	5.51333	5.63	5.04	5.235	5.83333	5.63333
207651_at	GPR171	G protein-coupled receptor 171	3.51667	3.38667	3.53333	3.73	3.45	3.395	3.45667	3.4375	3.07	3.24667	3.54	4.24	3.51	3.47	3.1	3.22333	3.34333	3.18	3.26333	3.51667	3.595	3.23	3.36667	3.45	3.28333	4.6	3.21	3.25	4.02	3.44	3.16	3.23667	3.51333	3.52333	3.57	4.03667	3.70333	4.09	3.78	3.89333	3.79667	3.49	3.67	4.56	4.765	4.75333	4.59333
228027_at	GPRASP2	G protein-coupled receptor associated sorting protein 2	8.77333	8.88667	8.52667	6.9	7.77	8.155	7.95	8.6275	8.87	8.05	6.57333	9.53	9.38	8.84333	8.86	9.46333	8.97333	8.38	8.53667	8.69	9	8.95	8.35667	7.96333	9.19667	8.54	8.38333	9.02	8.56	9.05	9.2	7.63	6.75	8.11333	7.83333	7.74	7.13	6.58667	6.92	7.43667	6.34	6.74	6.83	6.58	6.32	6.91	5.97333
210444_at	NPY6R	neuropeptide Y receptor Y6 (pseudogene)	5.67667	5.78667	5.72333	5.65	6.175	5.765	6.14	5.73	5.46333	5.71333	5.99	5.29	5.58	5.56	5.23	5.52333	5.82667	5.78333	5.41	5.77667	5.57	5.86	5.68333	5.98333	5.56667	5.43	5.49333	5.34667	5.65	5.57333	5.51	5.51667	5.89	5.7	5.64333	5.40333	5.3	6.01	8.16	7.39333	6.91667	5.62333	6.27	5.42	5.225	5.81333	5.84667
211492_s_at	ADRA1A	adrenergic, alpha-1A-, receptor	3.77	3.82	3.98333	3.92	4.03	3.83	3.80333	4.16	3.74333	3.87	3.7	3.53	3.725	3.74667	3.49333	3.62333	3.79667	3.73	3.69667	3.83	4.02	3.745	3.75667	3.77333	3.77333	3.54	3.66	3.61667	3.74	3.67667	3.73	3.72	3.78667	3.73667	3.63333	3.67	3.54	3.80333	4.42	3.84667	4.14	3.69667	4.11	3.75	3.735	3.84	3.87333
210832_x_at	PTGER3	prostaglandin E receptor 3 (subtype EP3)	5.37333	5.63333	5.43	5.28	5.25	5.135	5.62667	5.4725	4.90667	5.24667	5.51667	5.06	5.585	5.54333	5.25333	5.32667	5.48667	5.46	5.28333	5.64333	5.215	5.32	5.31333	5.59667	5.40667	5.68	5.33667	5.2	5.5	5.38	5.33	5.45333	5.4	5.51333	5.52	5.40333	6.61333	6.63	5.82	5.82	5.84667	6.14	5.53	5.94	6.455	7.68667	7.62
204464_s_at	EDNRA	endothelin receptor type A	4.44	4.64	4.44667	4.42	4.57	4.325	4.96	4.6075	4.45	4.68333	5.70667	4.52	4.695	4.68	5.19	5.05	4.78333	4.76667	4.58667	4.86333	4.035	4.29	5.24333	5.08667	4.78667	4.52	4.71333	4.65	4.2	4.96333	4.22	5.1	4.67	4.92667	7.38	6.70333	7.65667	6.73333	7.31	8.82333	7.27333	8.78	7.67	7.86	7.305	6.9	6.9
65718_at	GPR124	G protein-coupled receptor 124	5.26333	5.36	5.45333	5.39	5.465	5.615	5.18	5.265	5.53333	5.5	5.65	5	5.215	5.34667	5.19	5.45667	5.35667	5.36	5.57667	5.35	5.4	5.505	5.39667	5.28333	5.38	5.34	5.29333	5.29667	5.45	5.43	5.11	5.39333	5.07667	5.23667	6.30667	6.96333	5.84333	6.56667	6.05	6.50333	5.71333	7.65	6.4	6.17	6.185	6.56333	6.72
210724_at	EMR3	egf-like module containing, mucin-like, hormone receptor-like 3	4.36333	4.50333	4.64667	4.35	4.535	4.635	4.57	4.7325	4.61333	4.34667	4.44667	4.33	4.475	4.59333	4.23	4.30667	4.46667	4.75333	4.25	4.61	4.18	4.195	4.38333	4.47333	4.51	4.71	4.59	4.22	4.83	4.46333	4.3	4.38	4.77333	4.49333	4.58667	4.59	4.49333	4.74333	4.42	4.54	4.71333	4.34333	5.03	4.67	4.62	4.75667	4.55667
217008_s_at	GRM7	glutamate receptor, metabotropic 7	4.55333	4.64	4.58667	4.19	4.35	4.77	4.30333	4.515	4.24333	4.28333	4.25	4.61	4.78	4.46	4.20667	4.65333	4.79667	4.64333	4.15667	4.76	5.01	4.945	4.22	4.20667	4.33667	4.35	4.19	4.30333	4.57	4.44667	4.3	4.19333	4.24	4.19	4.24	3.95333	4.11333	4.41	5.26	4.51667	4.49333	4.09	4.7	3.98	4.175	4.28333	4.58
231804_at	RXFP1	relaxin/insulin-like family peptide receptor 1	4.03	4.05667	4.09333	3.86	4.235	3.885	3.81667	4.0425	3.98667	4.10333	3.75	7.04	6.765	4.57667	5.19667	5.7	5.00667	3.87667	3.85333	3.87333	4.18	4.2	3.78	3.77	3.77	3.8	3.75667	5.58	3.78	3.68333	3.85	3.75333	3.83	3.73	3.66667	3.66333	3.64	3.91333	3.86	3.75	4.01	3.73667	4.9	3.83	3.83	3.70667	3.74667
219898_at	GPR85	G protein-coupled receptor 85	3.37333	3.23667	3.27333	3.52	3.03	3.31	3.32667	3.6975	2.97667	3.13	2.89333	3.02	3.215	3.02667	3.10333	2.98333	3.46	3.60667	2.88333	3.29667	3.465	3.31	3.52667	3.03	3.27333	2.93	3.14333	3.05	3.33	3.18333	2.99	3.31667	3.14333	2.92	2.81667	2.88667	2.67333	2.84667	2.77	2.86667	2.80667	2.81667	2.91	2.65	2.865	2.94	2.85
233961_at	GABBR2	Gamma-aminobutyric acid (GABA) B receptor, 2	5.99333	6.33333	6.76667	6.18	6.81	6.69	6.17667	6.215	6.69667	6.69	6.09333	6.16	6.465	6.6	6.21	6.48333	6.54667	6.20333	6.08333	6.47	7.13	6.82	6.15	6.21	6.21667	6.62	6.53	6.24	6.68	6.28	6.3	6.01333	5.85333	6.11667	5.96333	5.93667	6.31667	6.24667	6.46	6	6.34333	6.19333	6.63	6.17	6.125	5.88333	6.23667
221572_s_at	SLC26A6	solute carrier family 26, member 6	4.85	4.98667	4.69	5.14	4.875	4.72	4.86333	4.985	4.92	4.67667	5.08	4.94	4.795	4.97	4.99667	4.88667	4.81667	4.90333	5.20333	4.95	4.72	4.475	4.76667	4.93333	4.76667	5.01	5.11	4.81667	4.9	5.10333	4.68	5.10333	5.19	4.9	5.18	5.47333	6.12333	6.15667	5	5.32667	5.3	5.12333	4.98	4.93	5.345	5.02667	5.11667
215070_x_at	RABGAP1	RAB GTPase activating protein 1	5.55	5.44333	5.04	5.74	5.095	5.075	5.29667	5.71	4.89333	4.76667	5.57	4.92	5.065	5.63667	5.30667	5.4	5.12667	5.62	5.73667	5.31	4.855	5.385	5.56667	5.43333	5.40667	5.7	5.54	5.19667	5.16	5.60667	5.14	5.2	5.84	5.22333	5.37	5.67667	5.55333	5.29	4.9	5.17667	5.14333	5.41	4.97	5.53	5.94	4.91333	4.75667
235591_at	SSTR1	somatostatin receptor 1	3.36333	5.36333	3.31333	3.59	3.045	3.33	5.43667	3.3925	6.46667	5.87667	3.2	5.6	5.15	4.14	3.91	4.65333	5.87667	3.54333	4.54	3.36333	3.285	3.89	4.22	4.23333	4.68	2.89	3.17667	5.00333	3.23	5.17	4.47	4.00333	3.15333	3.58	3.26667	2.93	3.13	3.47333	3.01	3.35	3.07667	3.20667	3.22	3.58	3.05	3.20667	3.03333
208390_s_at	GLP1R	glucagon-like peptide 1 receptor	7.63667	7.24333	7.15333	7.45	7.03	6.98	7.37	7.4325	7.08667	7.05667	7.37	7.07	7.23	7.19667	6.88667	6.98	7.45333	7.31333	6.94333	7.57	6.975	7.355	7.26667	7.22333	7.24333	7.43	7.06667	6.87	7.46	7.13333	7.12	7.02333	7.12	7.08667	6.7	6.95333	6.87333	7.27333	7.76	7.34667	7.78	7.18333	7.79	7.25	7.245	7.16	7.26667
1557763_at	P2RY5	purinergic receptor P2Y, G-protein coupled, 5	3.16	3.26333	3.01333	3.19	3.08	2.915	3.21667	3.1075	3.03	3.14	3.29	3.15	3.07	3.20333	2.95333	3.00333	3.21667	3.08667	3.02333	3.18	3.08	3.135	3.08667	3.25667	3.10667	3.15	3.19333	2.95667	3.26	3.16667	3.03	3.09333	2.99667	3.15	3.13333	2.95667	2.93	3.16667	3.05	3.13667	3.33667	3.05667	3.34	3	3.065	3.27333	3.03
209631_s_at	GPR37	G protein-coupled receptor 37 (endothelin receptor type B-like)	9.00667	8.05667	8.10333	11.08	9.665	10.005	10.1267	8.995	9.23667	9.55667	10.6133	9.11	10.115	8.82333	10.2633	9.41333	8.24667	9.66667	10.8767	9.68	8.305	9.27	10.68	10.7667	9.96667	5.83	7.32333	10.2433	7.21	10.2333	9.82	11.32	10.8033	10.25	4.41667	4.30333	3.87	3.24	3.19	2.97667	3.17333	3.30333	3.51	3.33	4.195	4.33	3.72
208524_at	GPR15	G protein-coupled receptor 15	4.13	4.09	4.06333	4.02	3.885	4.16	4.47333	4.1575	3.83	4.08333	4.41667	4.06	4.475	4.27667	3.97	4.14333	4.26	4.19667	4.06	4.06	3.81	3.675	4.02333	4.45	4.04333	4.19	4.17333	3.87333	4.08	3.95667	4.03	4.13667	4.22667	4.38333	4.17333	3.97667	4.32333	4.49	4.18	4.01333	4.34	3.74333	4.29	4.17	4.02	4.40667	4.64
210382_at	SCTR	secretin receptor	4.71	4.67667	5.1	5.07	5.36	5.07	4.83	4.9275	4.83333	4.93	4.78333	4.67	4.955	4.86333	4.68667	4.86333	4.67667	4.80333	4.78	4.75333	5.09	5.055	4.69	4.88333	4.61333	4.88	4.69	4.62333	4.84	4.79667	4.8	4.79667	4.98667	4.67	4.60667	4.50667	4.80667	5.12667	5	4.92	5.23	4.88	5.31	4.72	4.88	4.66	5.02333
220264_s_at	GPR107	G protein-coupled receptor 107	5.09667	5.17667	4.9	5.03	5.03	5.07	5.27	5.2425	4.87	4.93667	5.16333	4.79	5.2	5.25333	4.98667	4.86	5.07667	5.10667	5.01667	4.96333	4.995	5.05	5.11667	5.38333	5.10333	5.27	5.21333	4.95667	5.24	5.03333	5.21	5.03333	5.22667	5.12	5.31	5.09333	5.02333	5.15667	4.99	5.05667	5.19333	5.09667	5.19	5.17	5.085	5.29667	5.11333
221468_at	XCR1	chemokine (C motif) receptor 1	3.81333	3.70667	3.94333	3.86	3.965	3.82	3.75333	3.8175	3.75	3.91	3.93333	3.58	3.81	3.80333	3.58	3.64667	3.66	3.64667	3.66667	3.73667	3.75	4.07	3.73	3.69667	3.66667	3.89	3.69333	3.65	3.77	3.69	3.79	3.7	3.71333	3.70333	3.66	3.67667	3.76	3.97667	3.95	3.64667	4.00333	3.79667	4.04	3.76	3.79	3.77	4.19333
40020_at	CELSR3	cadherin, EGF LAG seven-pass G-type receptor 3 (flamingo homolog, Drosophila)	7.18667	7.16333	6.96	6.69	6.62	6.635	6.61	7.165	6.81	6.66667	6.41	7.2	7.01	7.27333	7.22	7.48333	7.16333	6.75667	6.97333	7.07667	6.82	6.89	6.64667	6.63	6.78	7.98	8.30667	7.07667	8.06	6.83	6.93	6.57333	6.32333	6.54	6.07667	5.94667	5.54	5.86333	5.83	5.5	5.97	5.49333	5.98	5.3	5.445	5.62	5.88667
208400_at	GLP1R	glucagon-like peptide 1 receptor	3.92	4.10667	3.71333	3.94	3.835	3.82	3.69333	3.7825	3.89333	3.77333	3.75667	3.64	3.715	3.76667	3.53	3.65	3.91	3.86	3.63667	3.79333	3.875	4.295	3.90667	3.85333	3.69667	3.93	3.76667	3.73667	4.21	3.73	4.06	3.8	3.76667	3.52333	3.55667	3.71667	3.49	3.86	4.25	4.09333	4.02333	3.77667	4.63	3.54	3.725	3.76	3.6
221424_s_at	OR51E2	olfactory receptor, family 51, subfamily E, member 2 /// olfactory receptor, family 51, subfamily E, member 2	4.77	4.88667	4.54	4.74	4.715	4.665	4.67667	4.85	4.66333	4.73333	4.68667	4.45	4.545	4.73333	4.4	4.52667	4.63333	4.90667	4.47	4.64667	4.73	4.755	4.56	4.71667	4.57667	4.76	4.74667	4.39333	5.01	4.56	4.81	4.51	4.65	4.58333	4.59667	4.49667	4.79667	4.66	4.96	4.71333	4.74	4.76667	5.19	4.72	4.77	4.69	4.68
208108_s_at	AVPR2	arginine vasopressin receptor 2 (nephrogenic diabetes insipidus)	4.61	4.74333	4.93667	4.68	4.895	4.875	4.51	4.825	4.47667	5.13667	4.55333	4.4	5.045	4.77667	4.44667	4.68	4.65667	4.63333	4.58	4.67667	4.86	4.96	4.78333	4.67333	4.58	4.96	4.70667	4.35667	5.01	4.65	4.75	4.36667	4.66333	4.46	4.75667	4.68667	5.05667	5.38333	4.97	4.79	5.06333	4.76333	5.31	4.5	5	5.46667	5.50333
216341_s_at	GNRHR	gonadotropin-releasing hormone receptor	3.67	3.71333	3.54333	3.61	3.84	3.895	4.19667	3.875	3.9	3.77667	4.06667	4.05	3.995	4.13	3.79667	3.65	4.20333	4.03	3.69333	3.91333	4.015	3.64	3.78	4.21	3.96667	3.66	3.76667	3.63333	4.03	3.68333	3.45	3.85	4.02	3.98	3.77667	3.67	3.77667	4.2	4.42	3.83	4.16	3.94333	4.12	3.71	3.66	3.85	4.12333
207177_at	PTGFR	prostaglandin F receptor (FP)	3.65333	3.86667	3.71667	3.68	3.62	3.77	3.82	3.375	3.61667	3.72667	3.70333	3.81	3.73	3.67667	3.58667	3.51	3.66333	3.86	3.6	3.60333	3.775	3.95	3.50667	3.66667	3.73333	3.73	3.46667	3.62667	3.58	3.71333	3.58	3.61333	3.6	3.68333	5.43	4.29	4.29333	4.52333	3.68	4.10333	3.72	4.90333	5.03	5.34	4.225	4	4.28
1553317_s_at	GPR82	G protein-coupled receptor 82	2.72667	2.49333	2.72333	2.59	2.855	2.59	2.55667	2.595	2.67	2.86	2.69	2.57	2.54	2.70667	2.49	2.49667	2.56667	2.65333	2.56667	2.56333	2.76	2.765	2.56333	2.61333	2.5	3.04	2.71667	2.54333	2.7	2.62333	2.5	2.59667	2.65667	2.62667	2.74333	2.72	2.68	2.7	2.61	2.56	2.63	2.67667	2.84	2.65	2.7	2.62667	2.73333
208526_at	OR2F1	olfactory receptor, family 2, subfamily F, member 1	5.47333	5.28333	5.20333	5.4	5.175	5.25	5.31	5.2825	5.34333	5.24667	5.15667	5.4	5.135	5.14667	5.06667	5.22667	5.40333	5.42	5.23	5.59667	5.47	5.2	5.12667	5.21	5.29333	5.04	5.05667	4.98667	5.59	5.38	5.31	5.09	5.15333	5.36667	4.98333	5.03333	5.19333	5.45667	5.27	5.23333	5.14333	5.20333	5.56	4.89	5.18	5.3	5.22
1553066_at	TAAR9	trace amine associated receptor 9	4.06	4.16333	4.12667	4.14	4.605	4.42	4.25	4.2025	4.05	4.27333	4.36667	4.11	4.21	4.42	4.01333	4	4.41667	4.37	3.90667	4.46	4.39	4.03	4.1	4.33	4.21333	4.19	4.01333	3.88667	4.2	4.14	3.99	4.03333	4.19333	4.20667	4.25667	4.13667	4.26	4.46333	4.2	4.13333	4.13333	4.47	4.36	3.77	4.085	4.32333	4.38333
1567257_at	OR1J2	olfactory receptor, family 1, subfamily J, member 2	5.49333	5.64	5.30333	5.84	5.275	4.845	6.00667	5.57	5.03667	5.24667	5.91333	5.36	5.945	5.66667	5.58667	5.7	5.83667	5.65	5.65	5.67667	5.165	5.15	5.53667	5.92	5.71667	5.59	5.73667	5.54	5.86	5.56333	5.58	5.66333	5.78	5.97	5.71	5.79333	5.77	6.11667	5.61	5.67333	5.8	5.76667	6.18	5.73	5.67	5.96667	5.97
206337_at	CCR7	chemokine (C-C motif) receptor 7 /// chemokine (C-C motif) receptor 7	3.59667	3.78	3.81667	4.07	3.62	3.465	3.88333	3.8725	3.42667	3.5	3.77667	3.56	3.66	3.87333	3.36667	3.55333	3.7	3.79	3.50667	3.77667	3.61	3.41	3.84	3.98667	3.68	4.29	3.64	3.54333	4.01	3.78333	4.33	3.69667	3.55333	3.82333	3.70667	3.87333	3.77667	4.26667	3.99	3.93	3.98333	4.23	4.48	3.76	5.805	4.90667	5.21667
219430_at	GPR137	G protein-coupled receptor 137	4.44667	4.54667	4.37667	4.44	4.03	4.43	4.04	4.5675	4.39	4.25667	4.25667	4.41	4.425	4.69	4.36	4.90333	4.26333	4.38333	4.07333	4.09333	4.48	4.555	4.12	4.32333	4.20333	4.52	4.62333	4.20667	4.11	4.16	4.79	4.16333	4.32	4.18	4.3	3.89333	4.41	4.18333	4	4.07333	4.07	3.93333	4.54	3.94	4.06	3.96	4.43667
207070_at	RGR	retinal G protein coupled receptor	5.27	5.24333	5.66333	4.85	5.715	5.645	4.87667	5.135	5.52333	5.7	4.82667	5.41	4.975	5.06667	4.83	4.99667	5.03667	4.98667	4.81333	4.87	5.36	5.715	4.81667	4.82667	4.84333	5.25	4.78667	4.73	5.01	4.92	5.26	4.85667	4.88333	4.72333	4.73667	4.68333	5.14667	5.32667	5.23	4.98333	5.41	5.05333	5.43	5	4.88	4.93667	5.35
242221_at	GRM3	Glutamate receptor, metabotropic 3	2.91	2.81333	2.77333	2.88	3.065	2.83	2.71667	2.755	2.90667	2.82667	2.60667	2.79	2.81	2.79	2.68667	2.78667	2.69	2.82333	2.59333	2.68667	2.9	2.835	2.71667	2.64667	2.75333	2.64	2.78	2.69	2.82	2.64667	2.86	2.66667	2.77	2.70333	2.6	2.59	2.7	2.63333	2.76	2.67	2.88333	2.67333	2.82	2.83	2.74	2.75333	2.8
1553293_at	MRGPRX3	MAS-related GPR, member X3	3.39	3.32667	3.79333	3.05	3.405	3.53	3.40667	3.3375	3.50667	3.43333	3.32333	3.41	3.395	3.28	3.05	3.25	3.23333	3.36	3.06333	3.26667	3.365	3.365	3.28	3.22333	3.25667	3.37	3.34333	3.02	3.33	3.44667	3.16	3.16667	3.44333	3.22667	3.30667	3.40667	3.76333	3.79667	3.32	3.12333	3.16333	3.46333	3.31	3.35	3.295	3.55333	3.65667
221385_s_at	FFAR3 /// GPR42 /// LOC654110	free fatty acid receptor 3 /// G protein-coupled receptor 42 /// similar to Putative G-protein coupled receptor 41	5.22333	4.92	5.55667	4.82	5.635	5.55	4.83333	5.05	5.23	5.78	5.03333	5.19	5.03	5.06667	4.81667	5.08333	4.76	4.94667	4.87333	5.01667	5.29	5.42	4.83	4.77333	4.65333	5.35	4.75667	4.81	5.03	4.98667	5.13	5.02667	4.97	4.82667	4.56333	4.66333	5.16667	5.33667	5.51	4.94333	5.23333	5.15333	5.69	5.7	5.075	5.12667	5.64
207887_s_at	CALCR	calcitonin receptor	3.79	4.08	4.25	3.74	4.16	4.335	4.07	4.1175	4.02333	4.39667	4.15667	3.83	4.04	4.14333	3.79667	4.15667	4.04667	3.99333	3.99333	3.93	3.975	4.16	3.99333	4.12333	3.79667	3.95	3.99333	3.78667	4.1	3.94667	3.89	3.88	3.89	4.12667	4.1	4.07667	4.32333	4.54333	3.99	4.18333	4.51	3.88	4.06	4.02	4.025	4.23333	4.16333
1566257_at	GPR180	G protein-coupled receptor 180	4.11333	3.9	3.81333	3.52	3.54	3.715	3.69667	4.08	3.77	3.54667	3.56	4.27	4.03	3.83667	4.17667	4.37667	4.13667	3.64667	3.46667	3.91	3.77	3.835	3.65	3.51667	3.89333	3.94	4.11667	4.19667	4.12	3.66	3.72	3.50333	3.48	3.83333	3.71	3.57333	3.74667	3.49667	3.42	3.24	3.21667	3.68333	3.38	3.23	3.535	3.69333	3.62
232657_at	GPR107	G protein-coupled receptor 107	4.02667	3.91333	4.25333	4.29	4.385	4.685	4.19667	4.2375	4.09333	4.29333	3.99333	4.27	4.245	3.94	4.11	4.16	3.89	3.94667	4.29333	4.17	4.105	4.375	3.93667	4.10333	3.91667	4.74	4.34	3.85333	4.45	4.03	4.19	4.21333	4.23667	4.17333	4.16667	4.29	4.55	4.61667	3.95	4.00667	4.06667	4.19667	4.66	4.29	3.855	4.14333	4.32667
223660_at	ADORA3	adenosine A3 receptor	4.52333	5.00333	4.42	5.12	4.61	5.515	6.25	5.005	4.30333	4.70667	6.46667	4.99	4.795	5.12	4.8	4.33667	4.69333	5.29667	5.25333	4.93333	4.055	4.24	5.99	6.02	5.53667	3.67	4.20667	4.96333	3.84	5.75667	4.62	6.55333	6	5.81667	3.86	3.89333	3.84333	3.82667	4.14	3.41667	3.83333	4.04	4.11	4.36	3.64	3.49	3.66
1555215_a_at	HRH3	histamine receptor H3	6.87333	6.5	6.93	6.31	6.51	6.5	6.60667	6.9025	6.39667	6.15333	6.55	6.18	6.435	6.30667	6.18333	6.48333	6.65667	6.48	6.51333	6.55333	6.82	6.88	6.36667	6.54	6.49667	6.39	6.52	6.26333	6.34	6.20667	6.43	6.40667	6.17667	6.46667	6.27333	6.11	6.22667	6.53	6.56	6.5	6.57	5.94	6.63	5.86	6.16	6.34333	6.69333
1567272_at	OR2K2	olfactory receptor, family 2, subfamily K, member 2	3.17	3.23	3.56667	3.49	3.835	4	3.11667	3.235	3.78667	3.73667	3.33	3.11	3.18	3.36333	2.96	3.14	2.99667	3.07333	3.08333	3.1	3.95	4.22	3.16	3.16667	3.05	3.25	2.92	3.07333	3.36	3.09333	3.45	3.14667	3.13333	3.22667	3.13	2.97	3.45333	3.26333	3.44	3.27667	3.38	3.23333	3.32	3.18	3.23	3.19	3.59667
224169_at	NPFFR2	neuropeptide FF receptor 2	4.04667	4.40333	4.02333	3.73	4.22	4.19	4.25	4.2525	3.76667	4.05333	3.94333	4.11	4.48	4.03667	4.07667	4.01333	4.23333	4.21667	4.11	4.18	3.895	3.79	4.09667	3.97	4.06	3.61	3.92333	4.07	4.12	4.10333	4.06	3.70333	4.19667	3.87667	4.23	3.72	3.64	4.14333	4.47	4.23	4.31	3.82667	4.25	4.28	3.915	4.41333	4.11667
232746_at	CMKOR1	Chemokine orphan receptor 1	4.18333	4.45	4.48	4.21	5.085	4.895	4.3	4.1125	4.28	4.67333	4.92333	4.15	4.165	4.42333	4.17333	4.16667	4.18	4.40667	4.41667	4.49667	4.02	4.285	4.72667	4.73667	4.18	4.1	3.93333	4.19	4.23	4.92667	4.05	4.15333	4.77	4.97333	5.19333	6.25	6.83	5.91667	4.54	5.82333	5.40333	6.81667	5.93	6.08	5.875	7.35333	6.14333
223767_at	GPR84	G protein-coupled receptor 84	3.78	3.97667	4.24	3.99	4.15	4.39	4.07667	3.965	3.82	4.10333	4.15667	4.18	4.03	4.11	3.58333	3.75667	4.01333	3.92333	3.68333	3.98333	4.14	4.245	3.96333	3.93667	3.78333	3.64	3.98667	3.57333	4.25	3.94667	4.05	3.83	3.84333	4.25667	3.84	4.2	4.33333	4.27	4.14	3.92667	3.84667	4.06667	4.28	4.29	4.07	4.00333	4.44333
233887_at	GPR126	G protein-coupled receptor 126	3.89333	3.89333	4.14	4.26	4.055	4.28	3.83333	3.755	4.19333	3.94667	3.91333	4.07	4.035	3.94667	3.80333	3.85	3.85	3.84333	3.99333	4.13	4.41	4.365	3.75	3.83333	3.73333	3.92	3.89	3.75667	4.22	3.88667	3.84	3.91	3.75	3.77667	5.35	5.20667	3.95667	4.12	4.12	4.15	4.05333	3.99	4.22	4.35	4.5	3.98	4.08667
207994_s_at	OPRM1	opioid receptor, mu 1	3.20333	3.03	3.06333	3.2	3.175	3.52	2.93333	3.1975	3.25333	3.02667	2.92667	3.18	3.09	3.22333	2.83333	3.05333	2.87333	3.02667	2.86667	2.97	3.34	3.08	2.76333	2.78667	2.81667	3.18	2.92667	2.86667	3.14	2.88667	2.98	2.86	2.93333	2.93333	2.86667	2.87333	2.93667	2.94667	3.02	2.74	3.03333	3.11333	3.22	3.12	2.865	2.91	3.09667
208215_x_at	DRD4	dopamine receptor D4	4.39667	3.87667	4.16333	4.54	3.96	4.155	3.91333	4.3025	4.04	4.16	3.88	4.25	4.195	4.42	3.97	4.21333	3.81	4.20667	4.25	3.88667	3.695	4.145	3.93333	3.95333	3.78333	4.46	4.27333	4.03333	4.7	3.97	4.09	3.92	4.26333	3.92667	3.82667	3.88667	4.36333	4.34	4.7	3.94667	4.62	4.16	4.38	4.58	4.12	3.93333	4.49667
1553006_at	GPR112	G protein-coupled receptor 112	3.78667	3.89667	4.19333	4.14	3.93	4	4.16	4.03	4.03667	4.05333	4.08333	4.06	3.885	3.95	3.74	3.71667	4.00667	4.11	3.90667	3.95	3.865	4.055	3.98	4.01	4.04667	4.48	3.80333	3.77667	4.03	3.92667	4.06	3.86667	3.89667	4.04	3.82667	3.72667	3.97	3.91667	3.74	3.77333	4	3.85333	4.32	3.74	3.91	3.85667	3.91
1556800_a_at	GRM8	Glutamate receptor, metabotropic 8	3.3	3.28333	3.83667	3.25	3.78	3.475	3.01	3.455	3.49	3.49667	3.01333	3.05	3.075	3.12	3.09333	3.27667	3.22333	3.09667	3.13	3.10333	3.48	3.495	3.18	3.21	3.25667	2.92	3.06333	3.13	3.01	3.35	3.27	3.07667	3.20667	3.12667	2.92	3.12	3.10667	3.11667	2.77	2.92667	3.05333	3.03667	2.88	3.32	2.87	3.18667	3.06333
211438_at	TRHR	thyrotropin-releasing hormone receptor	4.66333	4.91667	4.84	5	4.825	4.58	4.98667	4.7175	4.41667	4.73667	4.80333	4.51	4.93	4.96667	4.61667	4.45667	4.97667	4.8	4.51	4.60667	4.9	4.74	4.68667	4.88333	4.77667	5.12	4.71333	4.49667	4.97	4.70333	4.72	4.61333	4.84	4.9	4.71333	4.71	5.01667	5.17333	4.92	4.78333	4.99667	4.84	5.09	4.59	4.645	4.87333	5.00667
220805_at	HRH2	histamine receptor H2	6.14333	6.08333	6.05667	6.14	6.07	6.28	5.58333	6.085	5.68	5.78667	5.67667	5.94	5.66	5.93333	5.51	5.61	5.78	5.74	5.75333	5.66333	6.245	6.065	5.74333	5.83	5.72333	5.66	5.65	5.60333	6.32	5.65667	5.97	5.66333	5.76667	5.67333	5.57333	5.49667	5.77667	5.89333	6.35	6.03667	6.2	5.82	6.58	6.07	5.83	5.86333	5.86333
209906_at	C3AR1	complement component 3a receptor 1	5.73	6.03333	5.94	5.75	5.8	6.03	6.63333	6	5.95	5.79	7.04667	4.96	5.44	6.19667	5.52333	5.54333	5.60667	5.93	5.79667	6.13667	5.815	5.93	6.40667	6.88	6.18333	5.05	5.46667	5.66	5.62	6.35	5.47	6.82	6.90333	6.7	6.50667	6.42	5.76	6.2	6.09	5.82667	5.64333	6.25667	5.93	7.3	5.9	6.21667	6.46
221358_at	NPBWR2	neuropeptides B/W receptor 2	3.37333	3.21667	3.53667	3.36	3.33	3.485	3.44333	3.465	3.48333	3.53	3.39333	3.18	3.59	3.38667	3.2	3.33333	3.26	3.29333	3.21333	3.54333	3.515	3.335	3.39333	3.47667	3.32667	3.34	3.21333	3.16667	3.39	3.25	3.47	3.29667	3.33	3.30333	3.25333	3.27	3.74333	3.81333	3.37	3.47667	3.47333	3.38667	3.35	3.69	3.255	3.58667	4.02333
205536_at	VAV2	vav 2 oncogene	5.88	6.07	6.27333	5.86	6.125	6.365	6.06333	6.1625	6.21333	6.35	5.99	5.98	6.045	6.03	5.76667	6.11333	6	5.89333	5.95	5.96	6.175	6.245	5.81333	6.07333	5.95333	6	5.98667	5.77	6.3	6.09333	5.64	5.85333	5.82	5.94	6.07333	6.03333	6.05667	6.30333	6.21	5.95667	6.3	6.03333	6.46	6.21	5.91	6.11	6.31
220265_at	GPR107	G protein-coupled receptor 107	3.07333	2.99667	3.25	3.08	3.025	3.085	3.07	3.0575	3.17667	3.24	3.22667	2.98	2.85	2.91667	3.00667	2.95	2.80667	3.10667	2.95333	2.95	3.175	3.055	3.03	3.02333	2.98667	3.05	2.97667	2.9	3.02	2.98667	3.23	3.05667	3.09	3.02333	2.96	3.03	3.10333	3.12	2.92	3.08667	3.02333	2.96667	3.39	3.13	2.965	2.96	2.91
228770_at	GPR146	G protein-coupled receptor 146	4.76333	4.77	5.13667	5.13	5.39	4.925	5.02	4.7725	4.99	5.14667	5.05	4.74	4.21	4.79	4.87	4.68333	4.64333	4.64	5.53	4.81	5.64	5.145	4.94333	4.94	4.52333	4.82	4.79333	4.7	4.92	4.76667	4.33	5.24	4.83667	4.71	5.71	5.49667	4.98	6.51667	5.22	5.22	5.55667	5.54667	5.42	6.68	5.55	7.82	6.84667
208373_s_at	P2RY6	pyrimidinergic receptor P2Y, G-protein coupled, 6	4.46	4.39667	4.92	4.56	5.14	4.815	4.51667	4.5775	4.84667	4.91667	4.74333	4.26	4.405	4.57	4.34	4.47667	4.40667	4.47333	4.52333	4.41	4.895	4.805	4.32	4.53333	4.39667	4.41	4.43333	4.41667	4.52	4.36	4.42	4.59333	4.51333	4.54	4.55	4.65333	4.76667	5.23	4.76	4.58667	4.65	4.65667	4.87	4.66	4.525	4.6	4.76333
211265_at	PTGER3	prostaglandin E receptor 3 (subtype EP3)	2.99333	2.91667	3.08333	2.88	3.095	2.805	2.85	2.9425	3.50333	2.89333	2.83333	3.1	3.005	2.97667	2.84667	2.98	2.79333	2.83	2.94333	3.00667	3.155	2.995	2.81667	2.90667	2.85667	3.1	3	2.78	3.13	2.93667	3.01	2.76667	2.93	2.78333	2.76	2.84	3.08	2.99667	2.98	2.84667	2.94	2.96667	3.37	3.14	2.855	3.03	3.13667
1553856_s_at	P2RY10	purinergic receptor P2Y, G-protein coupled, 10	3.93	4.13	4.27	4.06	4.325	4.11	4.07	3.9825	3.92	4.25	4.32667	3.95	3.835	4.22333	3.87667	3.90333	4.17	4.12333	3.82	3.98	3.94	4.2	4.11	4.21667	3.94333	3.94	4.11667	3.85333	4.2	3.96667	3.95	3.87667	4.22	4.13	4.08	4.07667	4.11333	4.29667	4.01	4.16333	4.11333	4.16667	4.27	4.03	4.615	4.49	4.66667
210055_at	TSHR	thyroid stimulating hormone receptor	3.72333	3.47333	3.35333	3.69	3.53	3.645	3.76333	3.715	3.54667	3.64333	3.58	3.38	3.51	3.44	3.30667	3.35	3.51667	3.63667	3.36333	3.43333	3.42	3.34	3.39333	3.49	3.47	3.42	3.37	3.30333	3.5	3.58667	3.38	3.37333	3.57667	3.64	3.39667	3.40333	3.53667	3.83667	3.67	3.44667	3.59333	3.53667	3.37	3.56	3.26	3.73667	3.55667
230464_at	EDG8	endothelial differentiation, sphingolipid G-protein-coupled receptor, 8	6.02667	5.55667	6.01667	8.04	6.745	7.33	6.97	6.235	6.88667	7.10667	7.69333	6.15	7.06	6.54667	7.21333	6.33667	5.92	6.67667	7.80333	6.30333	6.235	6.305	7.28667	7.30667	6.49333	4.71	5.64	6.97333	5.49	6.92333	6.75	8.02667	8.17667	6.94	4.49333	4.58667	5.19	4.85667	4.56	4.57	4.91333	5.02	5.08	4.9	5.855	5.02	5.06667
216522_at	OR2B6	olfactory receptor, family 2, subfamily B, member 6	3.18333	3.32	3.43	3.49	3.515	3.385	3.39333	3.2775	3.42	3.53333	3.35667	3.13	3.335	3.33	3.17333	3.3	3.33667	3.31333	3.26333	3.23667	3.535	3.54	3.18667	3.42333	3.16333	3.41	3.23667	3.11	3.32	3.36	3.3	3.20667	3.29	3.46667	3.43667	3.34333	3.54	3.58333	3.4	3.26333	3.45	3.5	3.62	3.34	3.315	3.58	3.46667
211434_s_at	CCRL2 /// LOC642312	chemokine (C-C motif) receptor-like 2 /// similar to chemokine (C-C motif) receptor-like 2	4.32667	4.39	4.82667	4.04	5.11	4.465	4.52667	4.22	4.47333	4.51667	4.69	4.53	4.73	4.37333	4.23333	4.38333	4.42667	4.50333	4.41	4.19667	4.585	5.285	4.32333	4.38667	4.45333	4.21	4.32667	4.23333	4.55	4.36667	4.41	4.41	4.72667	4.33667	4.26333	4.27333	4.56	4.92	5.22	4.66	4.82667	4.45	4.74	5.34	4.555	5.29333	4.99
207333_at	NMBR	neuromedin B receptor	3.23667	3.49333	3.11667	3.22	3.28	3.265	3.43333	3.3825	3.10667	3.11333	3.36333	2.97	3.315	3.34667	3.15333	3.33	3.29	3.4	3.35667	3.36333	3.34	3.4	3.29333	3.28333	3.56667	3.55	3.53667	3.29667	3.76	3.17333	2.89	3.09	3.41	3.42667	3.43333	3.13667	3.29333	3.33	3.25	3.24	3.23667	3.13667	3.55	3.1	3.05	3.61333	3.06
219764_at	FZD10	frizzled homolog 10 (Drosophila)	3.72333	3.87	3.97667	3.74	4.035	3.7	4.04333	3.62	3.87667	4.16	4.07667	3.47	4.005	4.00333	3.76	3.72	3.75333	3.97667	4.01	3.96333	4.4	4.035	3.94	4	3.81	3.94	4.28333	3.73667	4.16	3.99667	3.77	3.85333	3.76333	4	4.06333	4.20667	3.80667	3.85333	3.61	3.56667	3.59667	4.19667	3.94	4.01	4.99	4.08	4.03667
230422_at	FPRL2	formyl peptide receptor-like 2	5.10333	4.9	4.80667	5.11	4.85	4.63	4.82333	5.02	4.75667	4.57333	4.88667	4.61	4.77	4.82667	4.49667	4.62333	4.95	4.96667	4.61333	5.07	5.045	4.71	4.84	4.77333	4.79333	4.97	5.02	4.74	5.06	4.83333	4.96	4.67	4.89	4.63667	5.16667	5.00667	5.27333	5.18333	5.11	5.36333	5.27333	5.50333	5.52	6.65	5.68	5.59333	5.86
210128_s_at	LTB4R	leukotriene B4 receptor	6.16667	6.20667	6.18	6.28	6.15	6.02	5.92	6.58	6.33667	6.26667	5.95667	5.97	5.935	6.12	5.87667	5.97667	6.21667	6.06667	6.14667	6.03333	6.375	6.365	6.09667	5.94333	5.81667	6.6	6.15333	6.07667	6.29	6.01667	6.37	6.05333	5.85	5.92	5.99333	6.1	6.17333	6.50667	6.3	6.27333	6.39	6.16	6.66	6.13	7.345	6.37	6.45667
206278_at	PTAFR	platelet-activating factor receptor	6.35	6.22667	6.25	6.49	5.86	6.105	6.16667	6.4	6.09	6.11	6.48333	5.85	5.96	6.08	5.71	5.92	5.69333	6.42333	6.30333	6.49	6.495	6.51	6.34	6.06333	6.3	6.59	5.80333	5.92	6.27	6.31	6.52	6.20667	6.40667	5.9	5.24	5.82	5.29667	5.47	6.63	5.84333	6.36333	6.02667	6.68	6.61	6.37	5.21667	5.89
226350_at	CHML	choroideremia-like (Rab escort protein 2)	4.65	4.92667	4.72	3.85	4.64	4.385	4.4	4.38	5.54333	4.67667	4.22	6.57	6.305	5.63333	6.45667	6.75333	6.01	4.67667	4.69333	6.03	6.155	5.63	4.75667	4.56	5.07333	3.8	4.42667	6.55667	3.89	5.06667	5.28	4.79667	3.99	4.56667	6.05	5.69333	6.49667	5.16	4.09	4.90667	4.99	5.32333	4.09	4.3	5.05	5.13	4.57
205419_at	EBI2	Epstein-Barr virus induced gene 2 (lymphocyte-specific G protein-coupled receptor)	3.55667	3.86	3.38	3.43	3.595	3.565	4.03333	3.4425	3.43	3.59	4.87	2.86	3.32	3.76	3.48	3.40333	3.56667	3.51667	3.37667	3.66	3.5	3.435	4.19	4.26667	3.86	3.06	3.29667	3.26667	3.08	4.42	3.84	4.18667	3.88667	5.05667	4.52333	4.84667	4.59667	4.21333	3.51	4.73	3.79	4.82	4.19	5.57	4.895	4.71667	4.72667
208169_s_at	PTGER3	prostaglandin E receptor 3 (subtype EP3)	3.04667	3.34667	3.61	3.21	3.775	3.54	3.05667	3.3375	3.44667	3.68333	3.2	3.22	3.025	3.22333	2.95	3.14333	3.17667	3.1	3	3.07333	3.485	3.695	3.21333	3.23333	3.13667	3.16	3.07333	3.08667	3.41	3.14333	3.19	3.06	3.19333	3.20667	3.27333	3.00667	3.92333	3.51	3.3	3.19333	3.23333	3.51667	3.16	3.74	3.375	3.67	3.88667
206825_at	OXTR	oxytocin receptor	5.01667	5.05	5.31	5.33	5.23	5.73	5.89667	5.16	6.72333	7.46667	4.68333	4.63	4.375	4.7	4.31333	4.53667	4.76667	4.81333	5.22333	4.74333	4.455	4.845	4.95333	4.99333	4.68333	5	4.23	4.87333	4.85	5.16	4.15	4.8	4.57667	5.14333	4.29	4.2	4.38333	4.28	4.26	4.13	4.31	5.58	4.9	4.38	4.105	4.31	3.99667
211598_x_at	VIPR2	vasoactive intestinal peptide receptor 2 /// vasoactive intestinal peptide receptor 2	5.88667	6.02333	6.55667	5.86	6.355	6.39	6.10333	6.05	6.35	6.35	5.97	5.86	5.725	6	5.67667	5.80333	5.70333	5.93667	5.65333	6.05	6.4	6.535	5.51	5.91667	5.68333	5.69	5.55333	5.71	5.86	5.90333	6.01	5.62333	5.65667	5.65333	5.58	5.39667	6.30667	6.30667	6.3	6.19333	6.23	5.88	6.22	5.74	5.525	6.23333	6.07
207752_x_at	PRB1 /// PRB2	proline-rich protein BstNI subfamily 1 /// proline-rich protein BstNI subfamily 2	7.03333	6.97333	7.89	7.11	7.825	7.83	7.08667	7.1025	7.36333	7.53667	6.86333	7.07	6.77	6.98333	6.43667	6.43	6.85667	6.95333	6.44333	6.93	7.68	7.82	6.80333	6.82	6.72667	6.49	6.39	6.43	6.92	6.81667	7.14	6.62333	6.64333	6.60667	6.59333	6.54333	6.7	7.21333	7.36	7.12333	7.43333	6.94667	7.53	6.98	6.805	6.88333	7.22333
1553262_a_at	UTS2R	urotensin 2 receptor	7.34	7.01667	7.52667	7.29	7.725	7.785	7.42667	7.245	7.37333	7.51667	7.58667	7.29	7.755	7.20333	7.23667	7.53	7.32667	7.06667	7.31667	7.06	7.385	7.845	7.13667	7.44667	7.02667	7.28	7.03667	7.30667	7.22	7.2	7.53	7.31333	7.20667	7.55667	7.52333	7.23	7.63	7.70667	7.58	7.56667	7.53333	7.26667	7.54	7.33	7.335	7.66667	7.93
1565951_s_at	CHML	choroideremia-like (Rab escort protein 2)	2.65333	2.71333	2.55333	2.3	2.785	2.83	2.63333	2.66	3.08667	3.01333	2.53333	3.08	3.175	2.95	3.27667	3.84	3.14667	2.6	2.66667	3.29667	3.24	3.055	2.58667	2.72667	2.63333	2.4	2.61	3.14	2.65	2.62	2.59	2.76333	2.62333	2.66667	3.22	2.98	3.33	3.08	2.42	2.81333	2.82333	3.06333	2.74	2.6	2.815	2.81	2.67
232290_at	GPRC5A	G protein-coupled receptor, family C, group 5, member A	5.41333	5.85333	5.51	6.14	5.705	4.805	5.52667	5.68	5.14333	5.40333	5.39667	5.82	5.57	5.57667	5.04	5.39667	5.47333	5.62333	5.21667	5.72333	5.205	5.23	5.67333	5.59	5.55	5.59	5.46333	5.41667	5.89	5.77333	5.33	5.10667	5.42333	5.46	5.55	5.77333	7.23	6.77667	5.93	6.33	6.35667	6.36333	6.45	6.09	5.815	6.98	5.76667
221066_at	RXFP3	relaxin/insulin-like family peptide receptor 3	3.51	3.41	3.65667	3.5	3.64	3.435	3.45	3.525	3.25667	3.46333	3.48333	3.48	3.675	3.52667	3.22667	3.33333	3.50333	3.44333	3.56	3.38333	3.43	3.55	3.33	3.46667	3.22667	3.6	3.32	3.29333	3.73	3.46	3.61	3.28	3.56667	3.4	3.45667	3.30667	3.84	3.96	3.35	3.4	3.55333	3.57	4.22	3.8	3.715	3.47	3.92333
220130_x_at	LTB4R2	leukotriene B4 receptor 2	5.64	5.33	5.52667	5.8	5.495	5.715	5.25333	5.7025	5.75333	5.75	5.32667	5.73	5.39	5.45	5.04333	5.32333	5.06667	5.25333	5.41	5.63667	5.835	5.795	5.40667	4.90667	5.15	5.89	5.17	5.07	5.81	5.36333	5.85	5.11	5.33333	4.79667	4.75333	4.97667	5.21667	5.24667	5.85	5.31	5.76	5.48333	6.31	5.8	5.765	5.17333	5.81333
221346_at	OR10J1	olfactory receptor, family 10, subfamily J, member 1	5.75667	5.79333	5.97333	5.59	6.11	5.79	5.9	5.8025	5.91667	6.37667	6.01	5.76	6.08	5.90333	5.63667	5.79333	5.91333	5.74333	5.73	5.53	5.97	6	5.7	5.92667	5.63667	5.74	5.84667	5.66	6.02	5.70667	5.79	5.75	5.81	5.82	5.68333	5.7	6.09333	6.03333	5.9	5.83	6.01333	5.80667	6.63	5.66	5.68	6.00667	6.23
220005_at	P2RY13	purinergic receptor P2Y, G-protein coupled, 13 /// purinergic receptor P2Y, G-protein coupled, 13	5.33333	5.96667	4.3	3.96	4.54	5.33	6.94333	5.2375	4.72667	4.8	6.92333	4.36	4.21	5.50667	5.66333	5.12667	5.53667	5.87333	5.61333	5.58	4.31	4.665	6.24667	6.64667	6.10667	4.2	4.48	5.53	4.31	6.04	4.95	6.77667	6.65333	6.48667	5.43667	5.04	4.22333	4.51333	4.1	4.40333	4.47333	4.84	4.57	3.87	4.765	4.64	5.18333
221465_at	OR6A2	olfactory receptor, family 6, subfamily A, member 2	3.91	4.00333	4.38333	3.95	3.89	3.91	4.29667	3.9125	3.85333	4.05	4.20333	4.36	4.31	4.09333	3.90333	4.16667	4.35333	4.26	4.12667	3.82667	4.22	3.865	3.92333	4.32	3.97333	4.36	4.12333	4.04667	4.32	4.03667	4.15	3.98667	3.96667	4.16	3.98333	3.87667	4.44333	4.43667	4.37	4.28333	4.14667	4.04667	4.25	3.89	4.065	4.24	4.64
210834_s_at	PTGER3	prostaglandin E receptor 3 (subtype EP3)	3.41333	3.38333	3.75333	3.57	3.775	3.58	3.59333	3.545	3.78667	3.9	3.60667	3.49	3.55	3.7	3.36333	3.48333	3.58	3.60333	3.55667	3.51	3.775	3.755	3.42	3.55667	3.46667	3.5	3.65333	3.32333	3.56	3.49333	3.62	3.51667	3.40667	3.57333	3.58333	3.71333	3.83	4.26333	3.52	3.50667	3.54667	3.84667	3.63	3.77	3.73	4.51333	4.01667
1553025_at	GPR126	G protein-coupled receptor 126	4.28333	4.33333	4.12	4.07	4.095	3.715	4.24333	4.18	4.13333	3.93667	4.34333	3.78	3.905	4.12	3.85333	3.93	4.25333	4.07333	3.91	4.24333	4.115	3.895	4.09	4.22333	4.01	4.2	4.04333	3.85333	4.15	3.95333	4.13	3.99	4.13	4.14333	3.84	3.84333	3.92333	4.28333	4.44	4.17333	4.52667	3.94333	4.21	4.05	3.89	4.10333	4.07333
205165_at	CELSR3	cadherin, EGF LAG seven-pass G-type receptor 3 (flamingo homolog, Drosophila)	6.44667	6.82667	6.43333	6.06	6.13	5.865	5.86333	6.5775	6.16	5.98	5.69333	6.51	6.21	6.58667	6.21	6.65667	6.75	6.44333	6.19333	6.47333	6.51	5.97	5.88	5.74667	6.08667	6.94	7.24	6.16	7.04	6.25	6.5	5.60667	5.77667	5.64	5.54333	5.40667	5.18333	5.51333	5.36	5.18333	5.53333	5.44	5.65	5.24	5.31	5.14667	5.40667
213476_x_at	TUBB3	tubulin, beta 3	10.1633	10.8667	10.29	9.43	10.48	10.705	10.6833	9.885	11.4533	11.1267	9.25667	10.8	10.915	10.5267	10.2567	10.9433	10.83	10.3267	10.9167	10.79	11.405	11.075	10.32	10.3433	11.19	10.12	10.2833	10.71	10.41	10.7667	11.57	10.2067	9.12333	10.65	12.1467	10.85	8.71	8.52	8.09	8.53333	8.05333	8.93333	8.96	8.31	8.84	8.06	9.27667
210393_at	LGR5	leucine-rich repeat-containing G protein-coupled receptor 5	5.11667	5.02333	5.12667	5.75	5.335	5.55	5.65667	5.1825	5.38333	5.16333	5.67667	4.99	5.405	5.26	5.13333	5.08333	5.17667	5.05667	5.26667	5	5.07	5.68	5.31	5.56667	5.23	4.63	4.99	5.25667	5.33	5.03333	4.83	5.6	5.75333	5.58667	5.68	5.25667	4.9	5.33667	5.09	5.04	5.15	4.64	5.16	4.7	4.73	5.11667	5.25
211359_s_at	OPRM1	opioid receptor, mu 1	4.7	4.67333	4.85333	4.59	4.735	5.075	5.13	4.7475	4.48333	4.80333	4.77333	4.32	4.705	4.80667	4.3	4.39333	4.95333	4.95667	4.20333	5.05	4.87	4.735	4.53	5.09667	4.67333	4.84	4.75333	4.38667	4.72	4.57333	4.59	4.38	4.65	4.70333	4.79	4.60667	4.54	5.18333	4.58	4.99	5.23667	4.69	4.77	4.49	4.49	4.92667	4.71
235642_at	ADRA1A	Adrenergic, alpha-1A-, receptor	4.77	5.63333	4.96333	5.46	5.395	4.73	5.3	5.0875	4.88	5.06	5.51667	5.96	5.28	5.38333	6.05667	5.83333	5.59	7.00667	5.44333	5.24333	4.5	5.08	5.50333	5.48333	5.91333	4.77	5.09667	6.21	4.77	5.54333	4.41	5.73	5.65333	6.04	4.21667	4.09	4.38333	5.14333	6.61	4.32667	6.40667	4.39	4.59	4.8	4.645	5.84667	6.52667
221431_s_at	OR12D3	olfactory receptor, family 12, subfamily D, member 3 /// olfactory receptor, family 12, subfamily D, member 3	4.38	4.47	4.24333	4.34	4.38	4.29	4.76	4.3975	4.33667	4.72	4.67	4.63	4.62	4.59333	4.45333	4.38667	4.51333	4.49	4.41	4.52667	4.655	4.575	4.44	4.78	4.57	4.63	4.71667	4.31333	4.79	4.37	4.37	4.38667	4.56	4.47667	4.54333	4.54	4.75	4.78333	4.81	4.6	4.89	4.48667	4.76	4.58	4.43	4.66333	4.86
241518_at	HTR2C	5-hydroxytryptamine (serotonin) receptor 2C	3.93333	4.06	4.15	4.14	4.45	4.3	4.65667	4.1825	4.16	4.06	4.29	4.28	4.125	4.47333	3.91333	4.13	4.32667	4.15333	3.97333	4.19667	4.405	4.205	4.21	4.41333	4.06	4.48	4.20667	3.85	4.75	4.17333	4.42	4.04333	4.32667	4.23667	4.28333	3.99667	4.19667	4.78333	4.35	4.24667	4.45	4.32333	4.89	4.34	4.16	4.67667	4.48667
207681_at	CXCR3	chemokine (C-X-C motif) receptor 3	4.57	4.57667	4.43	4.67	4.405	4.535	4.52667	4.6325	4.53	4.60333	4.50333	4.57	4.605	4.65667	4.35667	4.47333	4.59333	4.71	4.46667	4.78	4.61	4.565	4.42333	4.54667	4.57	4.78	4.41333	4.41	4.79	4.40333	4.51	4.43	4.66667	4.54333	4.42	4.59667	4.58333	4.79667	4.88	4.66667	4.96	4.56333	5.03	4.63	4.99	4.62333	4.76333
208747_s_at	C1S	complement component 1, s subcomponent	6.56333	6.67333	6.45	5.8	6.825	6.48	6.96	6.3175	6.71	6.75333	7.12333	6.52	6.535	6.71	6.04333	6.34667	6.40667	6.35333	6.44	6.27667	6.31	5.835	6.97333	7.40333	6.49333	6.11	5.97	6.24	5.47	6.97	6.41	6.47333	6.93333	8.12	10.6167	10.1867	10.4067	10.84	8.92	9.93333	8.30667	10.97	10.94	12.1	10.715	11.0833	10.7367
213313_at	RABGAP1	RAB GTPase activating protein 1	8.71667	8.82	7.65	8.7	7.49	7.66	8.94	8.405	8.22333	8.16	8.8	8.86	8.485	8.68333	8.93333	9.23	8.88	8.64667	8.97333	8.30333	7.08	7.57	8.54	8.66333	8.73333	8.09	8.43667	8.92667	7.72	8.80667	8.52	8.74333	8.96333	9.05	8.93	8.93	9.02	8.45333	7.83	8.02333	7.47	9.10667	7.79	7.77	8.2	8.09333	7.77333
217641_at	GPR135	G protein-coupled receptor 135	3.55667	3.56	3.40667	3.38	3.79	3.84	3.38333	3.5375	3.59	3.51	3.34667	3.39	3.245	3.47667	3.33333	3.27333	3.24	3.48333	3.42333	3.79333	3.94	3.885	3.6	3.34	3.67667	3.66	3.41667	3.38333	3.69	3.61667	3.86	3.45333	3.54	3.3	3.11	3.21333	3.43667	3.54333	3.32	3.61	3.82667	3.70667	3.9	3.47	3.495	3.37	3.31667
232626_at	TAS2R14	Taste receptor, type 2, member 14	4.45	4.53333	4.39333	4.75	3.92	4.435	4.04	4.645	4.03667	4.15	4.32	4.09	3.63	4.57667	4.41333	4.25333	4.16333	4.51333	4.75333	4.29333	4.005	4.085	4.20333	4.55333	4.2	4.53	5.08333	4.56333	4.45	4.33333	4	4.43333	4.75333	4.10667	4.16	4.42667	4.09333	4.46333	4.29	4.29	4.43333	4.3	4.19	4.3	4.285	3.99333	4.06333
218629_at	SMO	smoothened homolog (Drosophila)	6.04333	5.93	6.25667	6.07	6.205	6.18	6.22	6.0625	5.82333	6.10333	6.14333	5.91	6.11	6.10333	5.97667	6.08	6.09667	6.01	6.08	6.04333	6.27	6.05	6.01333	6.12	6.21333	6.47	6.21667	5.83667	6.52	6.14	6.04	6.01667	6.48333	6.20667	6.47667	6.23333	6.22333	6.48333	6.63	6.29	6.35	6.15333	6.43	5.95	6.38	6.04333	6.27667
1564984_at	GPR133	G protein-coupled receptor 133	4.45	4.31333	4.39	4.84	4.36	4.04	4.46	4.455	4.31	4.28333	4.61	4.48	4.685	4.57	4.16667	4.43667	4.52333	4.17333	4.37	4.33	4.425	4.365	4.42667	4.34333	4.4	4.56	4.35667	4.26333	4.67	4.36333	4.37	4.33667	4.46	4.39667	4.38333	4.38333	4.61667	4.90333	5.1	4.69	4.57	4.87	5.65	4.35	4.51	4.81333	4.72333
221322_at	C7orf9	chromosome 7 open reading frame 9	3.50667	3.28	3.40667	3.42	3.325	3.37	3.34333	3.4775	3.27	3.7	3.31	3.21	3.47	3.43667	3.15	3.16667	3.37	3.41	3.59667	3.36	3.18	3.515	3.29333	3.37333	3.23333	3.5	3.24333	3.20667	3.51	3.30333	3.22	3.24	3.27	3.44	3.14333	3.07333	3.26333	3.7	3.43	3.56667	4.03	3.36667	3.66	3.04	3.07	3.33	3.72667
205947_s_at	VIPR2	vasoactive intestinal peptide receptor 2	3.53	3.72333	3.69	3.79	3.655	3.84	3.47	3.7	3.53667	3.63	3.49333	3.55	3.845	3.76	3.34667	3.50333	3.47667	3.49	3.23667	3.52667	3.935	3.575	3.58	3.54333	3.50667	4.03	3.48667	3.28333	3.82	3.59	3.53	3.25667	3.57	3.63667	3.38333	3.47	4.10667	4.00333	4	3.7	3.86333	3.79667	4.16	3.71	3.43	3.88	3.98
214506_at	ADMR	adrenomedullin receptor	5.34	5.37333	5.61333	5.67	5.51	5.56	5.45333	5.4925	5.31	5.51	5.43667	5.22	5.465	5.41	5.18667	5.12333	5.3	5.48667	4.98	5.50667	5.79	5.825	5.30333	5.50667	5.34667	5.34	5.35333	5.04667	5.72	5.22667	5.2	5.37667	5.37	5.40667	5.12	5.35667	5.33333	5.5	5.82	5.5	5.70667	5.49667	5.77	5.59	5.68	5.58	5.76667
242871_at	PAQR5	progestin and adipoQ receptor family member V	4.03	4.25333	3.90333	4.35	4.1	3.955	4.72	4.1125	4.29	3.98667	5.04333	4.06	3.72	4.27	4.09	4.11667	4.16333	4.37667	4.62667	4.27667	4.17	4.485	4.81333	4.86	4.74667	3.62	3.93667	4.02	3.67	4.45	4.02	4.93	4.25	4.43667	4.5	6.71333	3.61333	4.00333	3.98	3.92333	4.16	3.66667	3.71	3.51	4.44	4.08667	3.53333
1554559_at	GPR62	G protein-coupled receptor 62	6.92333	6.63	6.91333	8.04	7.425	7.79	7.54667	7.125	6.95333	7.14667	8.18667	6.73	7.13	7.25	7.36	7.29	6.70667	7.44667	7.98667	7.23333	7.13	7.005	7.53333	7.78	7.21667	6.18	6.62667	7.39667	6.47	7.50333	7.41	8.12	8.50667	7.95667	5.96667	5.83333	6.16	6.50667	6.12	6.14333	6.17667	6.09	6.59	6.09	5.9	6.24333	6.58667
211590_x_at	TBXA2R	thromboxane A2 receptor	6.44	6.38667	6.72	6.62	6.51	6.71	6.44667	6.4	6.79	6.54333	6.50667	6.05	6.675	6.45	6.30667	6.58667	6.37667	6.41333	6.51667	6.29667	6.84	6.93	6.24333	6.48667	6.27	6.69	6.25333	6.21	6.43	6.24333	6.4	6.34	6.33	6.49667	6.27667	6.22333	6.85333	6.93	6.57	6.46	6.45333	6.6	6.99	6.45	6.385	6.52333	7.05667
223855_s_at	MCHR1	melanin-concentrating hormone receptor 1	3.51333	3.47333	3.6	3.45	3.57	3.63	3.43667	3.5075	3.68667	3.31333	3.39333	3.78	3.66	3.66667	3.52	3.63333	3.53333	3.52	3.49333	3.52333	3.7	3.615	3.37667	3.39667	3.44667	3.67	3.41667	3.54667	3.61	3.36667	3.8	3.43333	3.39	3.34	3.26333	3.45	3.31333	3.45667	3.37	3.5	3.5	3.75	4.16	3.57	3.72	3.46	3.62667
217028_at	CXCR4	chemokine (C-X-C motif) receptor 4	5.14333	5.41	4.91667	5.76	5.205	5.655	5.99333	5.15	5.32	5.29333	7.35667	5.23	5.005	5.17667	5.38333	4.88667	4.66	5.29667	5.68667	5.66333	5.075	4.89	6.32	6.79333	5.75667	4.35	5.19667	5.31	4.75	6.54667	5.3	6.65	6.92333	7.54667	8.37	8.69667	7.98333	8.02667	5.57	7.21667	5.66	7.17	8.12	9.44	8.82	9.57	7.77333
205870_at	BDKRB2	bradykinin receptor B2	5.68	5.82333	5.67	5.8	5.835	5.91	5.42333	5.4675	6.09	5.81667	5.56	5.63	5.35	5.58667	5.58333	5.50333	5.47333	5.6	5.64	5.47333	5.695	6.06	5.64333	5.30667	5.73667	6.27	5.97667	5.63333	6.27	5.81333	6.35	5.59667	5.64667	5.38667	6.22333	6.02667	5.79333	6.34667	5.98	5.61667	5.99	6.29667	7.28	6.91	6.28	6.28333	6.28
221456_at	TAS2R3	taste receptor, type 2, member 3	4.53333	4.70333	4.73	4.36	4.64	4.54	4.29	4.5225	4.74	4.63667	4.26667	4.47	4.645	4.62667	4.41	4.34667	4.56	4.35	4.29333	4.36667	4.475	4.78	4.21333	4.38	4.25333	4.64	4.45333	4.28333	4.7	4.43333	4.29	4.39	4.46	4.64	4.52333	4.38333	4.65667	4.79667	4.46	4.29	4.42333	4.41333	4.63	4.74	4.3	4.48	4.7
219683_at	FZD3	frizzled homolog 3 (Drosophila)	5.98667	5.37333	4.78667	4	4.125	4.06	3.96	5.03	4.1	3.56667	3.76	6.24	5.795	4.72667	5.81	5.86	5.98333	4.74	4.32	4.23	3.93	4.07	4.39	4.25333	5.05333	5.37	5.67	5.89	5.55	4.28333	4.75	3.88	4.52333	4.49333	4.14667	3.86667	3.42	3.33667	3.5	3.34333	3.26333	3.84667	3.37	3.58	3.775	3.18667	3.08333
237607_at	ADORA2B	Adenosine A2b receptor	6.07333	6.09667	6.20667	6.06	6.23	6.015	6.05333	6.1725	6.08	6.08	6.00333	5.89	5.895	6.21333	5.77	6.05667	6.06667	5.81667	6.01333	5.93	5.94	6.16	5.96	6.16333	5.77	6.12	6.07	5.71333	6.38	6.05667	5.95	6.01667	6.07667	6.07	6.03333	5.95667	6.47333	6.46	6.41	5.93667	6.11	6.34333	6.74	6.11	6.335	6.17333	6.42667
215442_s_at	TSHR	thyroid stimulating hormone receptor	2.80667	3.06667	3.2	3.1	2.92	3.04	2.88	3.095	2.96667	3.00333	2.94333	2.99	2.915	2.98667	2.86667	2.81667	3.01333	3.02667	2.92667	2.96	2.995	2.97	2.86333	2.86	2.90333	3.13	2.94333	2.98667	3.07	2.88667	3.09	2.85333	3.13	2.89333	2.86	2.96	3.04333	3.14667	3.04	2.96	2.98	3.06333	3.03	3.32	2.85	2.83333	2.92667
1553504_at	MRGPRX4	MAS-related GPR, member X4	4.03667	4.22667	4.38	3.97	4.305	4.145	4.15333	4.18	4.09	4.26667	4.17	4.08	4.235	4.19667	4.02	4.15	4.22667	4.20333	4.02333	4.09	4.185	4.025	4.03667	4.19	4.09333	4.02	4.13667	4.07333	4.33	4.06	4.09	4.04667	4.2	4.08	4.22667	4.21333	4.23333	4.38333	4.45	4.1	4.34333	4.23333	4.55	4.14	4.11	4.18	4.05
222953_at	GPR83	G protein-coupled receptor 83	5.53	5.57	5.57667	4.75	4.835	5.355	4.39333	5.1425	4.45667	4.54	4.41333	6.41	5.5	5.34	5.11333	5.48667	5.87333	5.45	6.20667	4.72	5.065	5.225	4.80333	4.66	4.71333	7.03	6.57667	4.97667	7.31	5.07	4.77	4.27667	4.44667	4.40333	6.76333	6.13333	4.28	4.39667	4.48	5.01667	4.74667	4.26	4.58	4.15	4.205	4.25667	4.29667
206972_s_at	GPR161	G protein-coupled receptor 161	4.21	4.14667	4.38333	4.52	4.325	4.545	4.5	4.2775	5.15333	4.91	4.09333	4.52	4.325	4.14333	4.44667	4.26667	3.99667	4.36667	4.32	4.46333	4.82	4.93	4.20667	4.14667	4.25	4.71	4.13	4.33333	4.23	4.35333	4.38	4.16	4.3	3.97	4.53	4.28667	4.53667	4.26333	4.42	4.20667	4.14667	4.32667	4.49	4.29	4.27	4.05667	4.25333
36499_at	CELSR2	cadherin, EGF LAG seven-pass G-type receptor 2 (flamingo homolog, Drosophila)	7.61667	7.74667	8.45	8.04	7.95	8.065	7.7	7.95	7.78	7.84667	8.19	8.43	8.01	8.07667	8.65667	8.36667	8.00667	8.45	8.19	7.87667	8.105	8.045	7.86333	7.91333	7.73333	6.8	7.25	8.49667	7.05	7.98667	7.32	8.31	7.86333	7.81333	7.28667	7.49	5.92	6.09667	5.65	6.61	5.48667	6.06	5.9	5.72	6.625	5.73	5.87
1553296_at	GPR128	G protein-coupled receptor 128	3.21	3.09	3.30667	3.08	3.395	3.225	3.09	3.24	3.30333	3.28667	3.05333	3.04	3.075	3.23667	2.89	2.98333	3.12333	3.17	2.91667	3.10333	3.325	3.155	2.94667	3.18667	3.18	3.2	3.09333	3.05	3.07	3.11	3.06	2.95333	3.10667	3.27667	3.17333	3.07	3.21	3.33333	3.04	3.19667	3.44333	3.27667	3.13	3.24	3.325	3.23333	3.18
244509_at	GPR155	G protein-coupled receptor 155	6.80667	6.05333	7.49	6.14	7.095	6.76	6.05	6.79	6.76333	6.43	5.82333	6.42	6.18	6.24667	6.60667	6.35333	6.09333	6.30333	6.43333	6.13333	6.93	6.865	6.12333	6.51667	5.96	6.04	6.15333	6.59	6.31	6.35333	6.31	6.21	5.92333	5.85667	7.67	7.03333	5.98333	6.11	6.12	6.16	6.26667	6.26	6.29	5.91	5.995	6.03333	6.07667
220333_at	PAQR5	progestin and adipoQ receptor family member V	2.90667	2.68333	2.91	2.42	2.905	2.915	2.70333	2.7925	2.76333	2.68333	2.89	2.86	2.855	2.70667	2.64	2.74333	2.65	2.66333	2.68333	2.88333	2.805	2.9	2.81667	2.64	2.55667	2.56	2.59333	2.55333	2.83	2.62333	2.92	2.80667	2.74333	2.62667	2.59667	2.69667	2.81333	2.70333	2.8	2.76667	2.78	2.75667	2.96	2.95	2.725	2.60667	2.73667
208543_at	OR10H2	olfactory receptor, family 10, subfamily H, member 2	3.53	3.47667	3.82333	3.55	3.825	4.09	3.55	3.57	3.91333	4.00667	3.65333	3.49	3.48	3.42333	3.39667	3.43667	3.31333	3.37	3.31	3.48667	3.865	3.645	3.44667	3.47333	3.33333	3.44	3.44667	3.3	3.44	3.28667	3.57	3.49333	3.44333	3.35667	3.33	3.43667	4.01333	3.83667	3.75	3.60333	3.64333	3.57333	4.04	3.37	3.35	3.72	3.64
205580_s_at	HRH1	histamine receptor H1	5.43333	6.21667	5.50667	5.28	5.52	5.215	5.66667	5.5825	5.64	5.41667	5.49333	5.79	6.275	6.11	5.72333	5.88	6.06667	5.64	5.71	5.57333	5.64	5.855	5.37	5.78667	5.52667	5.57	5.42	6.37667	6.12	5.37	5.47	5.35	5.43	5.36	7.23	6.08	7.45	6.58333	6.21	5.91333	5.94333	6.27333	7.22	7.19	6.105	6.30667	6.33667
206590_x_at	DRD2	dopamine receptor D2	6.86	5.14333	7.07667	5.62	6.59	6.52	6.22	7.0325	6.61333	6.50333	5.65333	5.22	5.595	5.35667	5.31667	5.55333	5.40667	5.2	5.73	5.59333	6.26	6.225	5.45	5.99333	5.24667	5.36	5.50667	5.2	5.64	5.30333	5.21	5.47	5.38	5.52333	5.33667	5.39667	5.81667	5.85333	5.48	5.13667	5.31333	5.31333	5.96	5.56	5.425	5.59	5.87667
221396_at	TAS2R7	taste receptor, type 2, member 7	4.54667	4.52333	4.56333	4.35	4.415	4.44	4.49667	4.47	4.16333	4.39333	4.51333	4.18	4.43	4.56	4.24	4.44333	4.6	4.50667	4.29	4.34	4.55	4.46	4.32333	4.50333	4.47	4.49	4.32333	4.21	4.51	4.27333	4.65	4.34333	4.32333	4.30667	4.33	4.15	4.20333	4.41667	4.51	4.29	4.42667	4.16667	4.33	3.9	4.17	4.35667	4.38667
211829_s_at	GPR30	G protein-coupled receptor 30	3.78333	3.91667	4.11	4.31	3.72	3.87	3.59	3.955	3.81	3.54333	3.81	4.28	3.95	3.92	3.59	3.77	3.59333	3.89	3.54	3.81	3.715	4.005	3.73	3.46333	3.67	4.09	3.62	3.67	4.1	3.79667	4.22	3.63667	3.67	3.3	3.24667	3.52333	3.77	3.53	3.76	3.35333	3.56	3.74	4.61	4.01	3.92	3.36	4.41333
205019_s_at	VIPR1	vasoactive intestinal peptide receptor 1	6.74333	6.95333	7.07333	5.74	6.865	6.69	5.93667	6.57	6.18333	6.51667	6.24667	6.86	6.765	6.89667	6.99333	7.46	6.98333	6.13667	5.81333	5.91333	6.385	6.195	5.85667	6.2	5.80333	6.46	6.80667	6.87667	6.51	5.87667	6.13	5.98333	5.56667	5.81	5.63667	5.63	6.20333	6.99333	6.05	6.59	6.34333	6.35	5.95	5.53	6.495	6.91	7.23
243146_at	ADRA1A	Adrenergic, alpha-1A-, receptor	3.01333	3.04667	3.02333	2.74	3.11	3.055	3.11	2.7825	2.87333	3.31	2.85	2.68	2.81	2.90333	2.88667	2.72667	2.98667	2.99333	2.81333	2.96333	3.27	2.895	2.97	3.03667	2.83667	2.72	2.97	2.95333	2.99	2.96667	2.74	2.87667	3.38333	2.93	2.82667	2.66333	2.91333	3.34667	3.5	3.13	3.38333	2.92	3.12	2.95	2.9	2.97667	3.04667
230866_at	CYSLTR1	cysteinyl leukotriene receptor 1	3.57	3.66333	3.43667	3.37	3.21	3.54	3.78667	3.595	3.36667	3.36667	3.88	3.37	3.175	3.62333	3.28	3.45333	3.42667	3.75333	3.39	3.70667	3.485	3.48	3.69667	3.70333	3.66	3.48	3.49	3.42333	3.37	3.67333	3.25	3.71667	3.69667	3.64667	3.96667	4.33667	3.78667	3.88	3.73	3.68333	3.59667	4.37333	4.2	3.82	4.455	4.22333	3.99333
1553222_at	OXER1	oxoeicosanoid (OXE) receptor 1	7.44667	7.59333	7.60667	7.66	7.575	7.59	7.63667	7.67	7.44667	7.47333	7.78333	7.53	7.7	7.77333	7.51	7.83333	7.64667	7.42	7.68	7.39333	7.74	7.635	7.44333	7.69333	7.57667	7.83	7.51	7.41667	8.03	7.51333	7.41	7.56	7.59333	7.84333	7.56	7.59667	7.82667	8.01	7.66	7.53667	7.49	7.45667	7.94	7.57	7.49	7.69667	7.99
216690_at	OR7C1	olfactory receptor, family 7, subfamily C, member 1	3.95667	3.97333	3.97333	3.99	3.83	3.91	3.89333	3.8525	4.1	3.87	4.04667	3.99	3.865	4.13667	3.65333	3.84333	3.98667	3.9	3.95	3.98	3.995	3.885	3.84667	3.92667	3.74	4.06	3.96667	3.65667	4.07	4.2	4.14	3.85	3.88667	3.85333	3.76	3.70333	3.92333	3.94667	4.08	3.78667	4.04333	3.99667	4.27	4.37	3.775	4.07	4.03333
203108_at	GPRC5A	G protein-coupled receptor, family C, group 5, member A	4.74	5.24667	4.80667	4.98	5.12	5.23	5.77667	5.0625	5.08667	5.37667	5.22	4.05	5	5.04667	4.17333	4.43667	4.96667	5.1	4.45667	4.94333	5.29	5.445	5.35667	5.67667	5.09667	4.94	4.74333	4.32667	4.97	5.23667	5.1	4.54667	4.83	5.65333	5.55333	5.97333	8.35	7.17333	6.02	6.49	5.68333	5.74333	8.75	7.25	4.925	7.12	5.23333
1567055_at	OR1C1	olfactory receptor, family 1, subfamily C, member 1	4.69667	5.02333	4.80667	4.75	4.56	4.96	5.46333	4.9225	4.37667	4.68333	4.73667	4.54	4.665	5.16	4.55	4.58333	5.19	5.2	4.69667	5.13333	4.87	5.07	4.85667	5.13667	5.02333	4.85	4.96	4.65	5.13	5.03333	4.87	4.79333	5.01333	4.81	4.67667	4.51333	4.69	5.14	4.92	5.07333	5	4.90667	5.13	4.53	4.525	5.06	4.76
1555620_a_at	PTGIR	prostaglandin I2 (prostacyclin) receptor (IP)	6.51333	6.32	6.99333	6.7	6.68	6.82	6.62667	6.6025	6.57333	6.6	6.79667	6.6	6.885	6.57333	6.36333	6.77667	6.58	6.38667	6.47667	6.45667	6.555	6.77	6.35	6.70667	6.43333	6.62	6.49	6.43333	6.6	6.49	6.67	6.52333	6.57667	6.77667	6.62	6.67	7.43333	7.01	6.57	6.69667	6.64333	6.77	7.18	7.36	6.65	6.76333	7.3
1555989_at	GPR135	G protein-coupled receptor 135	6.31	6.54667	5.92333	7.58	5.895	5.345	6.01	5.6025	5.86667	5.41667	6.00667	8.85	8.14	5.99	6.41	6.62333	6.88333	6.44667	5.69333	5.8	5.925	5.74	6.22667	5.88667	6.8	9.78	7.23667	6.34333	9.14	6.02333	7.85	5.98667	6.03667	6.32333	5.97333	5.66	6.00667	5.77667	7.94	7.21333	6.12667	6.47333	8.08	8	6.27	5.6	6.04
233042_at	C1S	Complement component 1, s subcomponent	3.66	3.92333	3.32	4.05	3.545	4.045	3.96	4.1525	3.27667	3.80333	3.87	3.8	3.815	3.88	3.57	3.68	3.96333	4.01667	3.55333	3.90333	3.735	3.56	3.89	3.79	3.78	4.79	4.34667	3.58	4.81	3.88333	4.27	3.58333	4.09333	3.76667	3.85	3.56667	3.46333	4.01333	4.26	3.81	4.19667	3.92667	4.6	4.3	4.125	4.06	3.78
229055_at	GPR68	G protein-coupled receptor 68	5.72333	6.46667	6.12667	6	6.23	5.7	6.08333	6	6.12	6.25	6.03667	6.13	6.205	6.35667	5.78667	6.14333	6.16333	6.15667	6.22333	6.46667	6.4	6.435	6.10667	5.93	6.19333	6.44	6.32333	6.01667	5.84	6.21667	6.03	5.89	5.90667	5.85	6.16333	6.02	5.79667	6.43667	6.22	6.09333	6.02667	6.78667	6.62	6.67	6.805	6.19333	6.29
222140_s_at	GPR89A /// LOC653519	G protein-coupled receptor 89A /// similar to G protein-coupled receptor 89	5.96333	6.31667	6.11333	6.39	6.485	6.53	6.58	6.2425	7.16	6.82333	6.62333	6.69	6.34	6.40333	6.72667	6.43667	6.32333	6.43667	6.75333	6.76	6.955	6.805	6.90333	6.35667	7.04667	6.69	7.02	6.75333	6.99	6.98333	7.32	6.87	6.60667	6.97667	7.30667	6.99667	6.38667	6.47667	5.86	6.52333	5.96	6.29333	5.83	6.78	7.18	6.43333	6.39667
221814_at	GPR124	G protein-coupled receptor 124	6.69667	6.52667	6.14667	6.03	6.24	6.32	6.82	6.49	6.10333	5.98667	6.73	6.04	6.05	6.69	6.40333	6.19667	6.4	6.61	6.58	6.81	6.5	6.455	6.68333	6.41333	6.36667	6.1	6.40667	6.3	6.23	6.72667	6.34	6.72333	6.2	5.97	7.67333	7.81333	6.73667	7.93333	7.14	7.65667	7.32	8.81	7.54	7.86	7.735	8.01	8.29
208565_at	MC5R	melanocortin 5 receptor	5.33	5.6	5.15333	5.17	4.77	4.905	5.38667	5.4275	4.99667	5.08667	5.35667	5.25	5.315	5.23	5.00667	5.09	5.60667	5.36333	5.2	5.40667	5.035	4.93	5.2	5.65	5.37	5.32	5.42333	5.17667	5.31	5.23333	5.33	5.28333	5.42667	5.41	5.46333	5.26333	5.19333	5.68333	5.53	5.44667	5.62	5.22333	5.43	4.78	5.395	5.39667	5.36333
217303_s_at	ADRB3	adrenergic, beta-3-, receptor	4.24667	4.28	5.17333	4.47	5.045	5.01	4.31	4.4275	5.09	4.83	4.37333	4.51	4.345	4.58333	4.11333	4.27	4.36333	4.35667	4.23	4.22333	4.785	5.245	4.28333	4.18	4.15333	4.43	4.20667	4.12667	4.84	4.19333	4.76	4.32667	4.34333	4.13	4.15	4.22333	4.44	4.36667	4.41	4.07333	4.38667	4.37	4.68	4.07	4.34	4.30333	4.66333
209869_at	ADRA2A	adrenergic, alpha-2A-, receptor /// adrenergic, alpha-2A-, receptor	4.09667	4.93	3.98333	4.4	4.625	4.29	5.04667	4.23	4.10333	4.61667	4.77	4.96	4.985	5.37	5.60667	5.48	5.15333	4.71333	5.16333	5.00333	4.53	4.64	5.03	4.99667	6.08333	4.99	5.4	5.45	5.05	5.28	4.52	4.51667	4.35667	5.02	5.87333	4.63	5.31667	5.74	4.15	4.9	4.56667	5.61667	5.97	7.41	7.335	6.92	8.37333
202020_s_at	LANCL1	LanC lantibiotic synthetase component C-like 1 (bacterial)	10.4933	9.62333	10.5633	10.69	10.59	10.79	10.62	10.02	10.63	10.71	11.15	10.13	10.72	9.96667	10.9433	10.6833	10.0767	10.2	10.4967	10.1133	10.675	10.86	10.8733	10.66	10.31	9.76	9.77667	10.88	9.81	10.7367	10.64	11.27	10.9833	10.8867	10.0167	9.65333	8.54	7.52667	7.95	8.10333	7.54667	8.27667	7.44	7.39	8.355	8.04	8.13667
211625_s_at	DRD3	dopamine receptor D3 /// dopamine receptor D3	4.17667	3.84667	4.04	4.14	4.255	4.01	3.94	4.035	3.56	4.05667	3.97333	4.08	4.01	3.88667	3.75667	4.05	3.84333	3.82	4.18	3.70667	4.03	4.08	3.80333	3.84667	3.71	4.23	3.86333	3.78667	4.12	3.81	4.09	3.88333	4	4.05333	4.02333	3.88333	4.16667	4.27333	3.86	3.91333	3.96333	3.96	4.1	4.27	3.795	4.1	4.14333
208401_s_at	GLP1R	glucagon-like peptide 1 receptor	5.41	5.65	5.03333	5.54	4.685	4.8	5.1	5.5775	4.79333	5.01667	5.14333	5.13	5.085	5.3	4.96333	4.91333	5.14	5.44	5.14333	5.36667	4.635	5.055	5.19333	4.87333	5.07333	5.48	5.30333	5.19	5.39	5.34667	5.39	4.94	5.06667	4.82	4.94333	5.14667	5.01667	5.39333	5.63	5.45333	5.59667	5.38667	5.8	5.43	5.285	5.12667	5.20333
208600_s_at	GPR39	G protein-coupled receptor 39	3.90333	3.86	4.32	3.39	4.18	4.18	3.97	3.9	4.02667	4.21333	3.89	3.64	3.815	4.09333	3.58667	3.85	3.8	4.02333	3.73333	3.83	3.78	4.005	3.83667	3.78667	3.85333	3.69	3.7	3.62333	3.91	3.78667	3.8	3.61	3.71	3.99667	3.72	3.84667	3.96333	3.91667	4.22	3.70667	3.89667	3.71667	3.9	3.77	3.795	3.75333	4.06
1555122_at	GPR125	G protein-coupled receptor 125	2.97333	2.87667	3.16333	2.8	3.155	2.93	2.80667	2.9025	3.06	3.20667	2.82667	2.87	3.015	2.80333	2.92	2.85333	2.90667	2.93	2.82667	2.94333	2.855	2.855	2.81333	2.91	2.96667	2.9	2.79	2.88333	2.68	2.95333	2.85	2.82667	2.95333	3.06667	2.80333	2.7	2.9	2.89667	2.8	2.89333	3.01	2.82333	3.01	3.07	2.685	2.79	3.04
206944_at	HTR6	5-hydroxytryptamine (serotonin) receptor 6	6.06	5.39333	5.98667	5.23	5.8	5.44	5.07	6.0925	5.03	4.98333	5.08	4.99	5.165	5.13	5.02667	5.17667	5.22333	5.37	4.82333	5.16333	4.815	5.05	5.13667	4.96	5.11333	5.45	5.12667	5.04	5.35	4.99667	5.17	4.96	5.18667	4.65333	4.67333	4.75333	5.03333	5.13	5.84	5.03	5.22667	5.03	5.45	5.31	5.06	4.93333	5.21333
235961_at	GPR161	G protein-coupled receptor 161	4.75	4.92667	5.41	4.9	5.29	5.32	5.10667	4.845	5.90333	6.02	4.81333	5.11	5.33	5.31667	5.24333	5.26667	4.73333	5.06667	5.08	5.44	5.285	4.99	5.19667	5.25667	5.06667	4.66	4.75333	5.04667	5.17	5.46667	4.81	5.17333	5.05333	4.89667	5.58	5.75333	5.71333	5.87	4.89	5.05	5.22	6.04333	5.45	5.14	5.06	5.18667	5.08667
205537_s_at	VAV2	vav 2 oncogene	4.88667	4.99333	4.59	5.53	4.895	4.8	4.75667	5.16	4.66333	4.86667	4.6	4.8	4.74	4.74	4.43333	4.32333	4.73	5.02333	4.33333	4.86	4.595	4.845	4.88667	4.6	4.89333	4.84	4.75667	4.52333	5.1	4.89	5.02	4.63	5.04667	4.62667	4.42667	4.61	4.74333	4.95	4.92	5.04	5.19333	5.12333	5.41	5.4	4.995	4.51667	4.99333
214652_at	DRD1	dopamine receptor D1	7.04333	4.15	5.51667	3.61	3.955	3.595	3.57333	6.225	3.36667	3.44667	3.39333	3.99	4.185	3.77	4.20333	4.13667	4.10333	3.82	3.53667	3.48667	3.485	3.395	3.52667	3.43667	3.42667	3.75	3.52667	4.04	3.97	3.49333	3.74	3.35667	3.74	3.4	3.54667	3.44	3.34333	3.56667	3.77	3.45	3.50667	3.49333	3.46	3.42	3.395	3.45667	3.40667
202019_s_at	LANCL1	LanC lantibiotic synthetase component C-like 1 (bacterial)	7.19	6.60667	6.81333	7.3	6.99	6.97	7.59333	6.825	7.23	7.06333	7.78	7.17	8.67	6.85667	7.64333	7.44	6.98333	6.89	7.24	6.88667	7.18	7.725	7.93	7.4	7.59333	6.76	6.77333	7.43	7.24	7.01	8.16	8.07	7.62667	7.65667	6.88667	6.51	6.24333	6.27333	6.46	6.11667	6.03333	6.14	6.68	6.07	6.11	6.26333	6.77667
228176_at	EDG3	endothelial differentiation, sphingolipid G-protein-coupled receptor, 3	5.35	5.49333	5.58667	6.27	6.545	5.895	6.02	5.005	5.71333	6.53	6.73333	5.56	5.365	5.04333	4.99667	4.74667	5.41	5.29667	5.49	5.51	6.025	5.38	5.76667	6.65	5.71333	5.1	5.04333	4.86333	5.33	6	4.97	5.73667	5.95333	7.56667	7.15	6.82333	8.84	7.89667	7.54	7.31333	7.04333	7.72667	7.23	8.09	7.055	6.52	6.3
211522_s_at	GNRHR	gonadotropin-releasing hormone receptor	3.08333	3.2	2.96667	2.96	2.905	2.955	3.2	3.0325	2.8	2.86667	3.05	3.04	2.885	3.04333	2.97	2.91333	3.03667	3.11333	3.03	3.13333	2.88	2.96	3.1	3.05333	3.08667	2.97	3.05333	2.94667	3.12	3.01667	2.89	2.95333	3.11	3.09333	3.12333	3.08333	2.98333	3.02667	3.07	3.1	3.31667	3.12	2.98	2.9	2.98	3.30333	2.90667
233300_at	TAS2R14	Taste receptor, type 2, member 14	5.54667	5.37667	6.07667	6.17	5.77	5.88	5.64333	5.6325	5.74	5.79667	6.14	4.78	5.09	6.01	6.42333	5.89667	5.74333	6.31333	6.12	6.10333	5.11	4.945	6.24	5.89667	5.98	6.04	6.47667	6.30667	6	6.45	4.92	6.34	6.70333	5.97333	5.67	6.52333	5.94333	5.77	4.39	5.54667	5.57	5.69	4.02	6.15	6.59	5.70667	4.84667
211909_x_at	PTGER3	prostaglandin E receptor 3 (subtype EP3) /// prostaglandin E receptor 3 (subtype EP3)	5.04333	5.51333	3.56	5.15	3.265	3.375	4.70667	5.18	3.62	3.41667	4.36333	4.56	4.11	4.95667	4.3	4.22667	4.71667	5.15667	4.45667	4.92667	3.915	3.49	4.91	4.14	4.94	5.47	4.75333	5.06667	5.49	4.66667	5.12	4.69	4.79667	3.81	3.92667	4.5	3.76333	4.02	5.61	4.62	4.89667	4.78	5.49	4.94	4.9	4.35	3.87333
244117_at	OPN5	Opsin 5	3.17	2.96333	2.78333	2.77	2.9	3.01	2.79667	3.0675	2.9	2.91667	2.72333	3.54	3.195	2.9	3.10333	3.62667	3.29667	2.79	2.81667	3.04	3.09	3.01	2.78667	2.98333	2.91667	3.09	3	3.12333	3.17	2.90333	2.74	2.80333	2.84333	2.90667	2.80333	2.68667	2.73667	2.89	2.62	2.78333	2.7	2.74667	2.79	2.66	2.7	2.76333	2.65667
208192_at	---	---	2.92667	2.92333	2.82	3.07	2.76	2.695	2.7	2.715	2.74333	2.59333	2.68667	2.8	2.62	2.72	2.48333	2.66667	2.62333	2.71	2.61333	2.7	2.635	2.845	2.68667	2.58667	2.67	2.96	2.68333	2.54	2.91	2.65333	2.64	2.64667	2.79	2.69667	2.57667	2.61	2.64333	2.69667	2.93	2.69667	2.80333	2.8	3.09	2.82	2.685	2.64667	2.73
213933_at	PTGER3	prostaglandin E receptor 3 (subtype EP3)	3.92333	5.28	3.69333	3.91	3.585	3.51	4.36	3.9475	4.42	4.07667	3.88333	5.41	4.515	4.74667	3.72	4.17667	5.18667	4.31	4.50333	4.43667	3.61	3.915	4.45333	4.09333	5.03333	4.03	4.08333	4.40667	4.37	5.13333	4.64	3.85667	4.18	5.04	7.01333	6.00667	7.00667	5.68667	4.78	4.48	4.88333	5.74667	4.45	5.17	6.385	7.80333	7.56667
1567251_at	OR10A3	olfactory receptor, family 10, subfamily A, member 3	3.61	3.66333	3.43333	3.44	3.42	3.585	3.70333	3.7475	3.67333	3.44333	3.73	3.27	3.85	3.75333	3.48333	3.51333	3.96	3.63333	3.47667	3.98	3.69	3.585	3.65667	3.93333	3.66667	3.27	3.79667	3.67333	4.02	3.67333	3.53	3.56667	3.79333	3.64667	3.61667	3.71	3.63667	3.87	3.85	3.44667	3.68	3.65	4.38	3.46	3.59	3.66	3.56
212070_at	GPR56	G protein-coupled receptor 56	8.58667	9.40667	8.27333	8.2	8.325	8.375	9.03667	8.5225	8.19	8.35667	8.82	8.22	7.255	8.69667	8.72333	8.29333	8.85667	8.88333	9.15333	8.46333	7.825	7.47	8.46	8.87667	8.30667	6.78	7.37	8.91	6.93	8.35667	7.06	8.69333	8.67333	8.75333	8.8	7.74667	6.50667	7.13667	6.48	6.57667	7.34	6.11	7.17	7.6	8.08	7.95	7
214391_x_at	PTGER1	prostaglandin E receptor 1 (subtype EP1), 42kDa	6.89667	6.82667	7.21333	7.15	6.945	6.96	6.78667	7.0175	7.44333	7.09667	7.01	6.52	6.915	6.95667	6.67333	6.98667	6.83667	6.71	6.79	6.76667	7.185	7.23	6.65667	6.95667	6.68	7.42	6.96333	6.57667	6.98	6.78333	6.74	6.79333	6.89	6.93	6.71667	6.90333	7.28333	7.35667	7.29	6.88	7.23	7.02667	7.38	7.25	6.96	7.07	7.26
223887_at	GPR132	G protein-coupled receptor 132	3.62	3.8	3.81333	3.52	4.015	4.08	3.67	3.74	3.80333	3.99333	3.73	3.53	3.425	3.60333	3.61	3.55333	3.66667	3.62667	3.67667	3.48333	3.69	3.72	3.78667	3.78	3.64	3.64	3.67	3.65333	3.78	3.63333	3.71	3.80667	3.75667	3.67	3.73333	3.66333	3.84333	3.73333	3.62	3.6	3.68667	3.79667	3.6	3.78	3.895	3.64333	3.88
244617_at	GPR26	G protein-coupled receptor 26	5.49667	6.41333	5.33333	5.71	5.79	5.57	6.86333	5.8375	6.91667	6.74667	4.99333	6.77	6.155	6.87333	6.41667	6.35333	6.06333	6.79	6.37	6.5	6.065	5.735	5.92	6.18333	5.72333	5.92	5.36667	6.55667	5.41	6.20333	5.91	5.20667	5.29	4.92667	4.99667	5.19333	5.05333	5.02667	5.85	5.20333	5.37333	5.30667	5.97	5.55	5.235	5.09667	5.12667
210640_s_at	GPR30	G protein-coupled receptor 30	5.88	5.94333	5.74333	6.25	5.75	5.97	5.81	6.135	5.46667	5.68	5.72333	5.78	5.665	5.84	5.66	5.59	5.64333	5.82667	6.00333	5.85333	5.67	5.405	5.94333	5.80333	5.79333	5.98	5.20667	5.68	5.78	5.68	5.55	5.82333	5.45333	5.43333	5.12	5.58667	5.91	5.86	5.7	5.37333	5.26	6.05	6.04	6.29	5.695	5.92667	6.52333
208049_s_at	TACR1	tachykinin receptor 1	3.47333	3.58333	3.91667	3.56	3.905	3.765	3.77	3.785	3.88	3.89	3.68	3.83	3.69	3.59667	3.57667	3.55333	3.57667	3.53	3.56667	3.62	4.075	3.86	3.61667	3.58333	3.49	3.88	3.73	3.38333	4.04	3.7	3.38	3.62	3.46667	3.45333	3.60667	3.59333	4.03333	3.80333	3.83	3.65667	3.72	3.65	3.9	3.9	3.665	3.84	4.11667
211266_s_at	GPR4	G protein-coupled receptor 4	4.45	4.90667	5.29	5.64	5.67	5.435	4.93	4.9825	5.26333	5.39667	5.14	5.02	5.025	5	4.66667	4.99667	4.98	5	4.77	5.47	5.255	5.335	4.87667	5.08333	4.87333	5.25	4.69	4.58	5.19	4.91333	4.99	5	4.97333	5.08	5.02	5.18	5.52	5.62667	5.1	5.13333	5.17667	5.02667	5.44	5.96	5.125	5.41333	5.64
207299_s_at	GRM1	glutamate receptor, metabotropic 1	6.06	6.26	5.61333	4.57	5.995	5.945	5.83333	5.9	6.12	5.46	4.08333	7.23	6.735	5.93333	5.81	6.80333	7.32333	6.34333	6.22	8.32	8.29	8.785	5.52667	5.04667	6.28333	9.09	9.29667	6.44333	8.63	5.83	7.1	6.24333	4.06333	5.09333	3.94	3.94333	3.73667	4.15667	5.92	4.1	5.09333	3.98333	4.36	3.85	3.8	4.13333	4.02
228950_s_at	GPR177	G protein-coupled receptor 177	6.58	6.49	6.31	6.26	6.445	6.26	6.34	6.1675	5.78	6.07	6.64333	6.68	6.11	5.73333	6.10333	6.14667	6.57667	5.86	6.64	6.73	6.67	6.195	6.18667	6.32333	6.52333	5.6	5.32333	6.42	5.38	5.85333	6.01	5.71333	6.58667	7.22	7.02333	6.21667	7.04333	5.98	7.23	6.90333	5.80333	6.60667	6.53	6.24	6.86	6.11	6.68
211174_s_at	CCKAR	cholecystokinin A receptor	4.58667	4.74	4.94	4.55	5.495	5.21	4.40333	4.6225	4.96	5.17667	4.49	4.55	4.38	4.55333	4.06667	4.46333	4.57333	4.40333	4.37667	4.33	5	5.205	4.23667	4.34667	4.18667	4.55	4.23667	4.40333	4.21	4.31333	4.67	4.27333	4.45667	4.44667	4.37333	4.41333	4.86333	5.10667	4.58	4.57	4.52333	4.68	5.05	4.69	4.265	4.71333	5.25333
1553178_a_at	SSTR3	somatostatin receptor 3	5.40667	5.2	5.67667	5.38	5.115	5.785	5.31667	5.405	5.33	5.35	5.34	5.22	5.455	5.52	5.28667	5.40667	5.41667	5.30667	5.39	5.20667	5.235	5.335	5.18667	5.35667	5.19333	5.66	5.35	5.20333	5.55	5.20333	5.2	5.27333	5.36667	5.39667	5.25667	5.36	5.61	5.56333	5.25	5.24667	5.27667	5.42333	5.47	5.37	5.385	5.32667	5.79667
211624_s_at	DRD2	dopamine receptor D2 /// dopamine receptor D2	6.21333	5.32333	6.16667	5.6	6.07	6.185	5.68333	6.3275	6.36333	6.55	5.38667	5.29	5.48	5.44667	5.12667	5.37333	5.33333	5.19667	5.39	5.59	5.935	6.155	5.31	5.45	5.16667	5.9	5.27333	5.08333	5.48	5.42333	5.53	5.19333	5.43333	5.44	5.23667	5.31667	5.72333	5.70333	5.54	5.43	5.74333	5.37	5.68	5.66	5.35	5.46667	5.61667
205357_s_at	AGTR1	angiotensin II receptor, type 1	3.72333	3.82333	3.87	4.01	3.61	4.23	6.05667	3.7775	6.14333	6.29333	4.26333	3.81	3.73	3.8	3.70333	3.77667	3.93667	4.03667	3.73667	3.81	3.755	3.645	3.8	4.65	3.85667	3.48	4.12	3.58333	4.22	4.04333	4.16	3.78667	3.90667	3.89667	4.97	3.98667	6.65	5.7	5.18	6.69333	5.35333	6.21667	6.54	7.69	5.87	8.38333	8.14667
211659_at	GPR135	G protein-coupled receptor 135 /// G protein-coupled receptor 135	4.75667	4.61333	4.39667	4.79	4.61	4.19	4.73333	4.6775	4.54333	4.38667	4.71	4.32	4.545	4.71333	4.41333	4.37333	4.59	4.63667	4.63333	4.76667	4.9	4.67	4.51333	4.31333	4.51333	4.62	4.31667	4.38	4.91	4.46	4.58	4.57	4.83	4.45	4.65667	4.35333	4.70333	4.87	5.31	4.76	4.81333	4.89	5.18	4.38	4.91	4.62333	4.74333
205911_at	PTHR1	parathyroid hormone receptor 1	6.33667	6.37667	5.90667	6.85	6.485	6.3	6.44	6.5325	6.35333	6.65	6.36	6.24	6.27	6.46	6.05	6.48667	6.17	6.27	6.38667	6.49333	6.34	6.08	6.43667	6.42	6.11333	5.9	6.26333	6.13	6	6.39667	6.16	6.52333	6.42667	6.62667	5.88	6.32	6.24667	6.78333	5.87	6.08	6.13667	6.56667	6.13	6.28	5.86	6.66	6.51
206696_at	GPR143	G protein-coupled receptor 143	5.30667	4.95	5.34	5.03	4.855	4.825	4.96333	5.2225	5.08333	5.12667	4.76667	4.56	4.435	4.76	4.46667	4.50667	4.66667	5.08667	4.59333	4.67667	4.38	4.575	4.87	4.76333	4.98	5.02	4.61	4.54	4.9	4.84667	4.9	4.70667	4.82667	4.86333	4.25333	4.19667	4.59	4.54667	4.75	4.55667	4.82	4.51667	4.99	4.47	4.71	4.62667	4.46667
222596_s_at	LGR4	leucine-rich repeat-containing G protein-coupled receptor 4	4.32	4.37333	4.28333	4.78	4.455	4.665	3.84333	4.645	4.44	4.41667	4.02333	4.61	4.18	4.34667	4.09	4.09667	4	4.19667	4.23667	4.17	4.67	4.62	4.08333	3.96667	4.01	4.96	4.22333	3.98667	4.95	4.22667	4.36	4.22333	4.17	3.82	3.77	3.95	4.31667	4.02	4.7	4.14667	4.45	4.52333	4.99	4.77	4.32	3.99667	4.45333
205119_s_at	FPR1	formyl peptide receptor 1 /// formyl peptide receptor 1	5.73667	6.17	6.03333	5.67	5.89	6.045	6.49667	6.0175	5.96667	6.06667	6.70333	5.73	5.92	6.32	5.74	5.65333	5.84333	6.22667	6.11	5.95	6.09	5.935	6.39	6.83667	6.07333	5.79	5.41667	5.75667	5.92	6.19667	5.71	6.68333	6.25667	6.94	6.28667	6.39333	6.11667	6.62333	6.03	5.91	6.09	6.21333	6.32	7.43	5.83	6.36333	6.2
1567288_at	OR5K1	olfactory receptor, family 5, subfamily K, member 1	2.78667	3.26333	2.82333	2.81	3.105	3.035	3.05333	2.945	2.82	3.06333	2.87	2.75	2.81	2.96	2.9	2.94	3.08	3	2.85667	3	2.98	3.025	2.94667	2.93667	2.84	2.96	3.16667	2.91	3.05	2.86333	2.58	2.96	2.99	2.93	2.93667	2.83333	2.94667	2.87667	3.05	3.04	2.98667	2.99333	2.75	2.86	2.865	2.94333	2.81
210772_at	FPRL1	formyl peptide receptor-like 1 /// formyl peptide receptor-like 1	3.28	3.16333	3.24667	3.41	3.355	3.26	3.18667	3.305	3.31	3.25	3.10667	3.3	3.275	3.11	3.13667	3.03	3.04333	3.28667	3.08	3.15	3.325	3.385	3.10667	3.1	3.27667	3.39	3.10333	3.03	3.25	3.17667	3.33	3.08667	3.23	3.06667	3.04333	3.15333	3.12	3.01667	3.17	3.08	3.37333	3.24	3.24	3.19	3.12	2.98667	3.09
207650_x_at	PTGER1	prostaglandin E receptor 1 (subtype EP1), 42kDa	5.21	5.32	5.5	5.5	5.155	5.02	5.24333	5.5325	5.1	5.37667	5.28	5.25	5.145	5.57	4.97333	5.23333	5.02667	5.10333	5.11333	5.16333	5.405	5.165	5.00667	5.37	4.95333	5.66	5.32667	4.83667	5.8	5.07333	5.21	5.01	5.21333	5.08333	5.12	5.14	5.46333	5.75	5.34	5.00667	5.31667	5.19333	6.08	5.65	5.365	5.30667	5.50333
1561042_at	ITGB1	integrin, beta 1 (fibronectin receptor, beta polypeptide, antigen CD29 includes MDF2, MSK12)	3.12	3.04667	3.13667	3.07	3.095	3.17	3.06	3.2175	2.90333	3.00333	3.10333	2.82	2.98	3.09333	2.98	3.11667	3.11333	3.04	3.02	3.14	3.085	2.91	2.88333	3.12	2.86333	3.02	2.98667	2.97667	2.82	2.96	2.91	3.12333	3.14667	3.20333	3.03667	3.07667	3.09667	3.41667	3.06	2.95333	3.04667	3.02333	3.23	2.97	2.965	3.15667	3.1
1553538_s_at	---	---	14.1067	14.05	14.0833	13.99	14.155	14.09	14.0633	13.935	14.19	14.1033	14.0067	14.07	13.895	13.9433	13.8633	14.0267	14.0533	14.0233	13.97	14.0467	14.12	14.2	14.04	13.9433	14.1033	13.91	13.9667	13.83	13.25	14	14.03	13.82	13.8033	14.0633	13.5533	13.6933	13.2933	13.0533	14.15	13.9833	14.1033	13.1533	13.78	13.34	13.655	13.6267	13.74
1560547_at	VN1R1	Vomeronasal 1 receptor 1	3.52333	3.71333	3.36333	3.73	3.455	3.47	3.45333	3.67	3.18333	3.28333	3.35667	3.6	3.45	3.80667	3.44333	3.46333	3.77667	3.56667	3.47667	3.61333	3.695	3.46	3.63667	3.50667	3.41333	4.43	3.99333	3.42333	4.29	3.50667	3.68	3.29333	3.61	3.36	3.3	3.33333	3.41	3.54667	3.45	3.30667	3.67	3.41333	3.62	3.6	3.37	3.36	3.42
231761_at	FFAR1	free fatty acid receptor 1	4.81	4.85667	4.84	5.29	5.27	4.77	4.70333	5.1625	4.95667	4.93	4.83667	4.61	4.64	5.08333	4.80667	4.56	4.63667	4.73667	5.05667	4.92667	4.745	5.23	4.76667	4.91	4.66667	5.18	4.92333	4.73	5.45	4.74333	4.77	4.8	5.12333	4.81333	4.48333	4.81667	5.29	5.23667	5.12	4.52333	4.99333	5.12	5.22	5.51	4.895	4.79667	5.15667
1567240_x_at	OR2L2	olfactory receptor, family 2, subfamily L, member 2	3.31333	3.41	3.01667	3.44	3.165	3.135	3.50333	3.595	3.18333	3.34667	3.21333	3.44	3.23	3.39667	3.26667	3.20667	3.41	3.43333	3.44333	3.39333	3.22	3.22	3.41	3.43667	3.27333	3.59	3.56667	3.18	3.49	3.24667	3.45	3.33667	3.35333	3.18	3.38	3.38	3.28333	3.47	3.24	3.46333	3.42667	3.33333	3.64	3.82	3.205	3.64	3.28333
221444_at	TAS2R16	taste receptor, type 2, member 16	3.92333	4.2	3.86	3.93	3.685	3.48	4.03333	3.9425	3.76333	3.59333	3.83333	3.56	3.835	4.08	3.63	3.60333	3.98667	4.00333	3.97667	4.10333	3.41	3.855	3.82667	3.95333	3.99667	3.76	4.02667	3.68333	3.9	3.72	3.85	3.73	4.03667	3.92	3.85667	3.75667	3.71333	4.25	3.89	3.95667	4.21333	3.69	4.17	3.66	3.825	3.96	3.88667
207368_at	HTR1D	5-hydroxytryptamine (serotonin) receptor 1D	4.82333	4.64667	5.00333	4.28	4.445	4.98	4.50333	4.8175	4.76333	4.57333	4.47	4.01	4.3	4.32	4.24333	4.18333	4.39667	4.21	4.2	4.41333	4.655	4.935	4.09667	4.4	4.29333	4.12	3.97	4.13	4.46	4.22	4.71	4.33333	4	4.25333	4.30667	4.04667	4.21667	4.5	4.96	4.55	5.05	4.15333	5.11	4.73	4.075	4.41333	4.67333
1570574_at	GPR177	G protein-coupled receptor 177	3.89667	3.91667	3.72333	3.81	3.705	3.53	4.18333	3.74	3.31667	3.61333	3.80667	3.56	4.125	4.14	3.58333	3.85333	3.91667	3.95333	3.81333	4.09	3.675	3.835	3.89	4.18333	4.09333	3.97	3.90333	3.72333	4.25	3.66667	3.85	3.78	3.79	4.02333	4.03	3.86	3.76667	4.35	4.21	4.03333	4.19333	4.17667	4.13	3.82	3.75	4.10333	4.02667
207151_at	ADCYAP1R1	adenylate cyclase activating polypeptide 1 (pituitary) receptor type I	5.37667	5.43333	5.37667	5.23	5.04	5.145	5.17333	5.445	5.24	5.11667	5.21333	5.27	5.25	5.2	4.99	5.00667	5.2	5.1	5.07	5.33667	5.16	5.24	5.26667	5.35333	5.14333	5.35	5.16333	4.86	5.5	5.11333	5.23	5.07667	5.07	5.14333	5.07	5.02	5.18667	5.53	5.27	5.15667	5.25	5.12667	5.65	5.36	4.965	5.24333	5.27333
226666_at	GPR135	G protein-coupled receptor 135	5.71	6.66	5.46	5.91	5.54	5.48	5.8	5.1625	6.21	5.56667	5.64	7.01	6.695	6.32	6.86667	6.86	6.68333	6.54333	6.07	5.96333	5.13	5.31	5.94667	6.03667	6.80667	6.73	7.02667	6.99333	6.19	6.42667	6.32	6.22	5.81	6.78	6.95667	6.46	7.77667	7.57333	7.1	8.00333	7.12	8.29	6.46	6.84	7.515	7.07	7.4
203437_at	TMEM11	transmembrane protein 11	7.02333	6.98	6.82	7.11	6.635	6.955	6.86333	7.07	7.07	6.68333	6.94	7.14	7.03	7.08333	7.02667	7.28	6.95667	6.76667	7.25667	6.88667	7.08	7.08	6.91333	6.82	6.95667	7.16	7.18333	6.96	7.39	7	7.09	6.92	7.14667	7.07333	7.25333	7.21333	7.32333	7.32	7.22	7.38333	7.28333	7.8	7.55	7.39	7.665	7.63	7.63333
1552857_a_at	HTR6	5-hydroxytryptamine (serotonin) receptor 6	3.94	3.88333	4.61333	3.91	4.215	4.32	3.94	4.135	4.17	4.08	3.97333	3.96	4.135	3.98667	3.73667	3.89	3.86667	3.87333	3.82667	3.80667	4.46	4.06	3.77667	3.97	3.73333	3.76	3.75667	3.71	3.89	3.75667	3.98	3.81	3.80667	3.77333	3.62333	3.56667	3.81333	4.1	3.98	3.97333	4.13	3.76333	4.02	3.84	3.63	3.9	4.13667
221469_at	GPR32	G protein-coupled receptor 32	4.12667	4.11333	4.13	4.29	4.035	4.45	4.01	4.125	4.09333	4.37333	3.97667	3.91	4.16	4.19	3.79	3.84667	4.05	4.05667	3.86667	4.03	3.945	4.28	3.94	3.95	3.87667	4.23	4.14333	3.88	4.2	4.01	4.22	3.77	4.13333	3.90667	3.92	3.80667	4.17667	4.20333	4.29	4.17	4.27	4.07	4.47	3.99	3.99	3.86333	4.36
227626_at	PAQR8	progestin and adipoQ receptor family member VIII	9.28667	9.46	9.04667	11.01	9.775	9.665	10.14	9.2975	9.36667	9.85	10.4067	9.23	8.33	9.42	9.73	9.36333	9.26333	9.4	9.84333	9.61667	9.22	9.355	10.0267	10.2933	9.31333	7.6	8.92	9.87	8.14	9.99333	9.66	10.5833	10.2933	10.3967	8.53	8.47	5.65333	6.52333	4.96	5.76	5.22667	5.21333	5.19	5.68	5.51	5.58333	5.30667
238569_at	GABBR1	Gamma-aminobutyric acid (GABA) B receptor, 1	6.41333	6.51	6.14667	6.4	5.845	5.985	6.54333	6.2075	5.92667	6.17	6.39	6.36	6.15	6.30667	6.28667	6.28667	6.50667	6.52	5.94333	6.39667	5.935	5.805	6.34667	6.48	6.48	6.19	6.45333	6.34667	6.41	6.31667	5.93	6.38333	6.49	6.67667	6.53667	6.56333	6.55667	6.18333	5.93	6.18	6.14	6.80333	5.83	6.38	6.18	6.25333	5.75667
216734_s_at	BLR1	Burkitt lymphoma receptor 1, GTP binding protein (chemokine (C-X-C motif) receptor 5)	5.15	5.36	5.20667	5.14	5.355	5.475	4.92333	5.13	5.2	5.23333	5.02	4.87	5.11	5.28667	4.86667	5.11333	5.15333	5.08667	5.13333	5.09	5.33	5.02	5.15333	4.93333	4.98667	5.14	5.00333	4.94667	5.68	5.04333	5.29	4.97667	5.11333	5.00667	5.03667	4.95333	5.20667	5.45333	5.46	5.10667	5.38333	5.26	5.87	5.52	5.205	5.11	5.42333
214348_at	TACR2	tachykinin receptor 2	5.72333	5.95667	6.29667	6.29	6.15	6.14	5.99	5.835	5.95333	6.15333	5.86	5.74	5.865	5.80667	5.55667	5.72	5.93667	5.99333	5.70333	5.91	6.155	6.19	5.63333	5.76333	5.67667	5.92	5.73	5.54333	6.05	5.61667	5.87	5.67	5.76667	5.64	5.57	5.62	5.96	6.05333	6.36	6.02667	6.31	5.98667	6.58	6.09	5.9	6.08333	6.18667
228949_at	GPR177	G protein-coupled receptor 177	4.53667	5.11333	5.18	4.37	5.42	5.335	5.02667	4.3375	4.71667	4.99667	5.26667	4.44	4.295	4.19333	4.44	4.28333	4.32333	4.44333	5.10333	6.15	6.18	5.195	4.99	4.80333	4.67	3.26	3.71333	4.59667	3.46	4.80333	4.46	4.58333	4.77	5.75	6.23	5.73	7.09	6.28333	6.35	6.30667	5.28333	6.69333	5.76	5.85	6.195	6.30333	5.8
232195_at	GPR158	G protein-coupled receptor 158	9.95333	7.57	9.45667	6.87	8.465	7.97	7.76333	9.695	8.74333	7.82	7.30333	8.97	8.79	8.31667	8.83667	9.16	8.50667	7.3	7.61667	8.93667	9.555	8.995	8.40667	7.74333	8.73667	9.93	10	8.80333	10.09	8.65333	9.43	8.08333	5.79667	8.12667	7.58333	7.11333	4.57667	5.00667	4.57	4.63	4.85	4.4	4.6	4.45	4.635	4.78	4.92
1567256_at	OR1J2	olfactory receptor, family 1, subfamily J, member 2	4.47333	4.53667	4.29333	4.61	4.445	4.24	4.20667	4.62	4.42333	4.51667	4.2	4.39	4.19	4.48	4.14333	4.14333	4.31	4.37	4.29333	4.30333	4.7	4.635	4.26	4.23	4.31	4.5	4.28667	4.23667	4.63	4.46	4.49	4.14	4.39667	4.19	4.20667	4.31	4.13333	4.24333	4.31	4.13667	4.27667	4.3	4.7	4.41	4.215	4.13	4.16
204896_s_at	PTGER4	prostaglandin E receptor 4 (subtype EP4)	4.16	4.08333	4.9	4.25	4.405	4.805	4.06333	4.32	4.57667	4.83667	4.47667	4.03	4.55	4.34333	4.06	4.28667	4.11667	3.99667	4.25333	4.32333	4.98	4.52	4.00667	4.22667	4.29333	4.38	4.17667	3.98333	4.59	4.11333	4.38	4.05	4.18667	4.31333	4.32333	4.02	5.13667	5.02333	4.83	4.20667	4.56	4.58	5.02	4.84	4.69	4.46333	5.34
221357_at	CHRM4	cholinergic receptor, muscarinic 4	5.47	5.00667	5.50667	5.03	5.085	5.63	5.02	5.22	5.03333	5.11	5.12	4.87	5.305	5.08	4.99333	5.26333	5.23	5.02	5.02333	4.80333	5.39	5.35	4.75667	4.99	4.68667	5.06	4.91667	4.82	5.34	4.93667	5.02	4.99667	4.83333	5.09333	5.32	5.06333	5.57667	5.57333	4.81	4.91333	5.02667	5.08667	5.08	5.21	4.96	5.22	5.65333
221353_at	OR3A1	olfactory receptor, family 3, subfamily A, member 1	4.05333	3.95	4.13667	4.26	4.455	4.405	3.94333	4.095	4.20667	4.12333	3.87333	4.17	3.98	3.97667	3.88	4.05333	3.81333	3.91	3.87333	3.79333	4.49	4.165	3.79667	3.78667	3.86667	4.26	3.83	3.84	4.15	4.02667	4.22	3.94667	3.79667	3.94667	3.86333	4.04	4.12333	4.08333	3.76	3.85333	3.99333	4.08	4.53	4.18	3.835	3.94667	4.19
221363_x_at	GPR25	G protein-coupled receptor 25	3.60333	3.48	3.96667	3.91	3.44	3.75	3.41333	3.7875	3.86333	3.61667	3.54667	3.5	3.615	3.63333	3.39	3.47	3.28333	3.40667	3.35667	3.62	3.71	3.785	3.4	3.29	3.48	3.7	3.50333	3.35667	3.91	3.51667	3.82	3.36667	3.47667	3.31667	3.34667	3.4	3.97667	3.71333	3.9	3.50667	3.6	3.80333	4.12	3.54	3.66	3.41667	3.64667
206128_at	ADRA2C	adrenergic, alpha-2C-, receptor	7.12	6.59333	7.20333	6.05	6.425	6.18	5.80333	7.2525	5.82667	5.95	5.38333	6.21	5.59	6.26667	5.53	5.81667	5.85	6.07333	5.73333	6.01333	6.185	5.97	5.85333	5.58667	5.83333	6.49	5.94	5.79	6.25	6.01333	6.19	5.62667	5.76667	5.3	5.49	5.92	7.09667	6.44667	6.51	5.76333	6.08	7.13333	6.87	6.73	6.195	5.69	5.74667
244228_at	RABGAP1	RAB GTPase activating protein 1	2.84333	2.98333	2.72	2.88	2.73	2.87	2.82	2.8825	2.61333	2.74333	2.76667	2.75	2.835	2.85333	2.79	2.7	3.00667	2.94333	2.61	2.97667	2.74	2.795	2.79	2.81667	2.74333	2.77	2.85333	2.84333	2.94	2.77333	3.02	2.77	3.04667	2.7	2.73667	2.77	2.69	2.74333	3.2	2.77	2.76	2.87	2.69	2.64	2.815	2.96	2.87667
211469_s_at	CXCR6	chemokine (C-X-C motif) receptor 6	4.06333	4.32667	3.94333	4.68	3.945	4.35	4.26667	4.2075	3.90667	3.88667	4.19667	4.03	4.03	4.1	4.02333	3.96667	4.09667	4.18333	3.98333	4.19	3.95	3.925	4.10333	4.25	3.98667	4.3	4.16667	3.90333	4.32	4.04667	4.59	4.06667	4.16333	4.08333	4.01333	4.03333	4.05667	4.29667	3.92	4.02	4.54667	4.11667	4.68	4.33	4.19	4.17667	4.60667
218855_at	GPR175	G protein-coupled receptor 175	5.66	5.68667	5.26	5.65	5.54	5.49	5.40333	5.6025	5.47667	5.58667	5.60667	5.44	4.96	5.68667	5.71	5.70667	5.37333	5.67667	5.87333	5.48	5.675	5.465	5.46667	5.52667	5.33333	5.93	5.96333	5.56667	5.89	5.38667	5.4	5.50667	5.74667	5.67	5.89	5.76	5.99333	6.32333	5.63	5.87333	5.85333	5.76333	5.47	5.97	6.005	6.11	5.78667
234871_at	GPR98	G protein-coupled receptor 98	3.58333	3.80667	3.86667	3.13	3.46	3.355	3.22	3.415	3.26	3.25333	3.23	3.12	3.35	3.4	3.3	3.43	3.60667	3.56667	3.19333	2.99667	3.325	3.15	3.06	3.25	3.04333	3.17	3.15667	3.43667	3.64	3.15667	3.24	2.95333	3.25	3.20333	3.39	3.28	3.37	3.3	3.31	3.17333	3.07	3.39	3.21	3.1	3.01	3.19	3.25667
221383_at	NMUR1	neuromedin U receptor 1	4.17333	3.98667	4.76667	4.05	4.81	4.675	3.87667	4.2075	4.39333	4.78333	3.87333	4.16	3.945	4.11333	3.97667	4.00333	3.86667	3.95667	3.98	3.97333	4.665	3.82	3.71333	3.82667	3.74333	3.98	3.88667	3.82667	4.24	3.97667	4.32	3.99667	3.79	3.86333	3.66	3.83	4.63	4.09333	4.65	3.95	4.17667	3.95	4.73	4.15	4.01	3.97333	4.76333
1560225_at	CNR1	Cannabinoid receptor 1 (brain)	3.64667	3.34333	4.21	3.2	3.37	3.25	3.01	3.6825	3.25667	3.41333	2.92	3.1	3.605	3.17	3.11333	3.51	3.31	3.12667	3.02	2.83	3.25	3.14	2.89333	3.12333	2.78333	3.82	4.64667	3.28667	4.38	2.98	3.47	2.89	3.02333	3.08667	2.86333	2.88667	2.85333	3.09333	2.88	2.77	3.02	2.96667	3.11	3.08	3.15	3.34667	3.18333
221387_at	NPFFR1	neuropeptide FF receptor 1	6.53	6.38667	6.81333	6.55	6.74	6.595	6.03333	6.415	6.54	6.56333	6.18	5.95	6.21	6.41	5.87333	6.09	6.13	6.11333	6.06	6.22667	6.61	6.575	6.23667	6.33667	6.02667	6.57	6.34	5.96	6.24	6.30333	6.57	5.95333	6.17	6.09667	5.93333	6.04667	6.26333	6.31667	6.6	5.95	6.47333	6.01667	6.67	6.14	6.185	5.75333	6.19333
207445_s_at	CCR9	chemokine (C-C motif) receptor 9	3.77333	3.67333	3.67667	3.51	3.75	3.66	3.76333	3.8625	3.48333	3.43	3.72667	3.88	3.725	3.72	3.71	3.73667	3.54	3.74	3.71333	3.49667	3.535	3.825	3.54	3.87667	3.53333	3.71	3.74667	3.63333	4	3.70667	3.81	3.79333	3.82333	3.71	3.94667	3.89333	3.73	3.99	3.71	3.53333	3.58	3.66667	3.86	3.59	3.535	3.91	3.63667
1562049_at	SCTR	Secretin receptor	2.52667	2.62667	2.84	3.03	2.74	2.595	2.64	2.6275	2.93	2.78333	2.65667	2.65	2.68	2.75	2.78667	2.78667	2.64667	2.59667	3.02667	3.09667	3.46	3.185	2.73333	2.66667	2.68667	2.67	2.66667	2.69333	2.58	2.68667	2.65	2.61667	2.63	2.74667	2.54	2.64667	2.60333	2.71	2.65	2.79667	2.86	2.67333	2.79	2.52	2.675	2.72333	2.63667
230498_at	MCHR1	melanin-concentrating hormone receptor 1	4.88667	5.86	5.46	4.67	5.855	5.595	5.26	5.1	5.90333	5.28	4.85667	5.95	6.385	6.23	5.85	6.48	6.15	5.35667	5.65667	5.51	5.325	5.64	5.16667	5.23	5.4	5.1	5.11667	5.75667	5.32	5.44333	5.58	5.19333	4.79667	5.05667	5.02667	4.52	5.12333	4.86667	4.56	4.96667	4.62	5.22667	5.08	4.73	4.56	4.55667	4.87
208214_at	ADRB1	adrenergic, beta-1-, receptor	3.85333	3.69667	4.08	3.83	3.975	3.955	3.57	4.025	3.96667	3.85667	3.47333	3.99	3.87	3.81333	3.81	3.73	3.63667	3.54333	3.24333	3.61	4.165	3.825	3.56	3.46333	3.39333	4.14	3.32	3.70667	3.66	3.62	3.66	3.41	3.44667	3.27333	3.1	3.36667	3.66	3.66333	5.33	4.67333	4.20333	3.44667	4.18	3.94	3.425	3.47	4.02667
221360_s_at	GHSR	growth hormone secretagogue receptor	4.03	3.93667	4.08	4.18	4.205	4.21	3.85333	4.11	4.42333	4.1	3.85667	4.05	3.95	4.14667	3.56667	3.95	3.56333	4.02333	3.84333	4.16	4.04	4.22	3.88667	3.72667	3.87333	4.31	3.74667	3.77	4.33	4.02	4.32	3.80667	3.89	3.49667	3.47667	3.73	3.85	4.00667	4.19	3.9	4.35667	4.02667	4.87	4.1	4.17	3.80333	4.26
211226_at	GALR2	galanin receptor 2	3.64667	3.39	3.63333	3.6	3.95	3.87	3.24	3.62	4.02667	3.82	3.24	3.49	3.605	3.59333	3.50333	3.58	3.56333	3.18333	3.50333	3.40667	3.765	3.76	3.46667	3.40333	3.25333	4.11	3.46333	3.37667	3.61	3.46667	3.85	3.61667	3.38333	3.34333	3.31	3.25333	3.60333	3.64	3.72	3.51667	3.64667	3.47667	3.6	3.43	3.74	3.45667	4.35333
220565_at	CCR10	chemokine (C-C motif) receptor 10	4.94667	5.04667	4.85667	4.89	4.405	4.695	4.60667	5.235	4.96333	4.76667	4.27333	5.2	4.82	5.09333	4.80667	4.97333	4.81333	4.72	5.13333	5.06333	4.87	4.695	4.68333	4.50667	4.60333	5.37	5.38667	4.83	5.59	4.92667	4.75	4.51	4.64667	4.60333	4.67333	4.87333	4.88	4.74	5.31	4.79667	4.85	4.97333	5.98	5.15	4.76	4.65	5.05333
221297_at	GPRC5D	G protein-coupled receptor, family C, group 5, member D	5.37333	5.24333	5.67667	5.28	5.545	5.365	5.54	5.085	5.27	5.11	5.51	5.39	5.775	5.30667	4.97667	5.34667	5.54	5.32	5.16333	5.4	5.25	5.655	4.95333	5.57667	5.28	5.14	5.07	4.99333	5.41	5.33	5.32	5.08	5.12333	5.46667	5.26	5.15333	5.35333	5.90667	5.56	5.36	5.43667	5.04667	5.98	5.61	5.16	5.56	6.03333
221392_at	TAS2R4	taste receptor, type 2, member 4	4.79667	4.86667	4.74667	5.19	4.885	4.53	4.95	4.605	4.24333	4.65667	4.58333	4.46	4.62	4.78333	4.49	4.51	4.92667	5.13333	4.28333	4.94667	4.615	4.91	4.74333	4.94333	4.80333	4.81	4.86	4.64	4.73	4.68	4.85	4.58	4.68333	4.63	4.44667	4.42	4.34	4.63667	4.76	4.50333	4.95333	4.48667	4.7	4.56	4.58	4.47667	4.6
244130_at	HTR2A	5-hydroxytryptamine (serotonin) receptor 2A	3.75667	4.17333	3.66667	3.32	3.195	3.4	3.79333	3.13	4.18667	3.90667	2.98667	6.31	6.31	5.21	5.9	6.49333	5.98667	4.20667	3.24	3.94	3.995	4.59	3.68333	3.63	3.70667	3.14	2.94333	5.95	2.93	3.48	3.21	3.23333	3.05333	3.61333	2.96	2.89	3.4	3.23333	3.09	2.96667	3.08667	4.55	3.39	2.98	3.015	2.93333	2.87333
235664_at	GPR177	G protein-coupled receptor 177	4.99333	5.12	5.14667	4.97	5.555	5.495	5.22	4.9975	5.10667	5.54667	5.60667	4.94	4.84	4.96	4.96	5.04333	5.06333	5.06	5.20333	5.52	5.72	5.46	5.00667	5.21333	5.22667	5.13	4.91	4.96	5	5.18667	5.07	5.05333	5.37333	5.7	5.17667	5.06667	5.2	5.25333	5.36	5.18667	5.14667	5.04	5.45	4.68	5.05	5.11333	5.04
224531_at	GPR61	G protein-coupled receptor 61	3.94333	3.89	4.22667	3.66	4.14	3.725	3.89333	3.9975	4.11667	3.78333	3.66	3.93	4.385	3.89667	3.72	4.09333	4.15667	3.68	3.67667	3.77	3.94	3.845	3.58667	3.83667	3.65667	4.17	3.8	3.80667	4.59	3.71333	4.18	3.67667	3.63333	3.83667	3.65	3.61667	3.85333	3.98	3.91	3.63333	3.69667	3.74333	4.16	3.73	3.915	3.90333	3.97
216587_s_at	FZD8	frizzled homolog 8 (Drosophila)	5.17	5.12667	4.94333	5.09	4.905	4.81	5.04333	5.035	4.77333	4.70667	4.95333	5.18	4.81	5.03667	4.48	4.87	4.89	4.95667	4.40667	5.03	4.725	4.9	4.85667	4.41667	5.14667	4.96	4.97667	4.52667	4.67	4.95667	4.93	4.55667	5.07333	4.66667	4.58667	5.22667	5.18333	4.99	5.85	4.9	4.95667	5.10667	5.89	5.51	5.055	4.62667	5.13
214605_x_at	GPR1	G protein-coupled receptor 1	2.95333	2.96667	3.08	2.97	2.97	2.825	2.81	2.9925	2.91333	2.94	2.87	2.71	2.625	2.83	2.68	2.9	2.84667	3.00333	2.90667	2.90333	2.67	2.85	2.87667	2.94333	2.77333	3.44	3.09333	2.71333	2.88	2.88	2.71	2.65333	3.03667	2.95667	2.76333	2.87667	2.69333	2.98667	2.6	2.89	2.89333	2.71333	2.6	2.97	3.01	2.81	2.68333
1554706_at	OR2L13	olfactory receptor, family 2, subfamily L, member 13	2.87667	2.71	2.69333	3.52	2.905	2.92	3.10667	2.7925	2.76667	2.97667	2.95	3.64	2.89	2.88333	3.67667	3.19333	3.23333	2.93	3.21	3.01333	2.785	2.88	3.35333	3.07	3.25	2.72	2.87667	3.22667	2.76	3.14	3.47	3.26667	2.81667	3.30667	2.97	2.78333	2.60333	2.63333	2.59	2.6	2.70333	2.64333	2.6	2.63	2.66	2.6	2.57667
216738_at	HRH1	Histamine receptor H1	5.69333	5.78333	5.80667	5.74	6.085	5.825	6.02	5.655	5.81	5.99333	5.77333	5.45	5.865	5.53	5.43333	5.47333	5.75333	5.79	5.53	5.72333	6.06	5.905	5.71667	5.82	5.63333	5.76	5.52667	5.41	6.12	5.54667	5.47	5.6	5.69667	5.64	5.55333	5.69	5.64	6.17333	6.12	5.83	6.16333	5.88333	5.97	5.47	5.625	5.75667	5.73333
206701_x_at	EDNRB	endothelin receptor type B	6.19667	5.69	5.98	5.86	5.785	5.63	6.34667	5.77	5.42333	5.84667	5.85333	6.09	4.73	5.22	5.95667	5.12	5.81333	5.77667	5.85	6.61	5.065	5.235	6.69667	6.35667	7.44667	4.2	5.23	6.18333	4.77	6.3	5.42	6.07	4.91	7.25333	7.79667	7.66667	5.25333	5.62667	6.17	6.33	5.80333	5.58667	5.49	7.91	6.325	6.86333	6.66
208391_s_at	GLP1R	glucagon-like peptide 1 receptor	4.37333	4.40667	4.65	4.86	4.985	4.595	4.37	4.5275	4.78333	4.37333	4.66667	4.34	4.255	4.40667	4.39	4.36	4.44333	4.51333	4.26667	4.43667	4.33	4.45	4.37333	4.44667	4.21667	4.68	4.42333	4.12667	4.29	4.42	4.43	4.30667	4.28667	4.30667	4.22333	4.15667	4.66667	4.43	4.43	4.37	4.60333	4.28333	4.92	4.3	4.375	4.16333	4.69
221398_at	TAS2R8	taste receptor, type 2, member 8	3.60667	3.79333	3.43667	3.63	3.355	3.575	3.92	3.535	3.42	3.56667	3.79667	3.17	3.565	3.55333	3.51333	3.43667	3.55333	3.70667	3.67	3.58	3.76	3.61	3.58667	3.79333	3.77	3.39	3.70667	3.58667	3.5	3.53667	3.38	3.29	3.99333	3.67333	3.58	3.47667	3.58333	3.70667	3.57	3.62333	3.49	3.36	3.7	3.32	3.545	3.73	3.32
230252_at	GPR92	G protein-coupled receptor 92	4.13667	4.51	4.48667	3.7	4.235	4.78	5.52	4.2075	4.22333	4.63667	6.09333	3.63	3.755	4.79333	4.62333	4.27333	4.2	4.59333	4.83333	4.59333	4.255	4.14	5.43667	5.33333	5.04333	3.53	4.13333	4.48667	3.51	5.38667	3.88	6.21333	5.36	5.31667	4.34667	4.80667	3.99	4.01667	4.09	3.79333	3.99667	3.8	3.75	3.64	4.66	4.22667	4.14667
206136_at	FZD5	frizzled homolog 5 (Drosophila)	3.98	4.40667	4.27	4.39	4.18	4.46	4.46333	4.58	4.34667	4.38667	4.38667	4.79	4.635	4.57667	4.16	4.34333	4.10333	4.39333	4.31667	4.63667	4.27	4.685	4.47	4.18667	4.32	4.31	4.40667	4.19667	4.93	4.32667	4.49	4.24	4.51667	4.32667	4.01	4.09	4.55	4.29667	5.04	4.25	4.59333	4.64333	5.12	4.86	4.47	4.64667	5
214597_at	SSTR2	somatostatin receptor 2	4.52	4.57667	5.38	4.13	4.575	3.995	3.95667	4.445	4.10333	4.07	3.89667	4.76	4.53	4.41	3.99667	4.36667	4.24667	4.95	3.88667	4.33333	4.15	4.35	3.98667	3.82	4.24333	5.46	4.77333	4.29333	5.06	4.26	4.49	3.81333	3.91333	3.92333	3.41	3.99	3.67	3.73	4.27	3.99	4.36333	3.96333	3.97	4.25	4.16	3.61333	3.85667
236946_at	GPR75	G protein-coupled receptor 75	5.12667	5.19667	5.28333	4.49	5.01	5.42	5.38333	5.2325	4.81667	5.18667	5.44	4.4	4.565	4.97	5.41	4.83333	5.21	5.62	5.16	5.31667	5.235	4.59	5.30333	5.56	5.26667	4.45	4.96667	5.57333	5.11	5.24667	4.46	5.25333	5.57333	5.07667	4.31	4.27	4.01333	4.31	4.44	4.39	4.79333	4.49333	3.95	4.28	4.605	4.47667	4.34
227819_at	LGR6	leucine-rich repeat-containing G protein-coupled receptor 6	5.12667	4.99333	5.18	5.79	5.92	5.86	5.43	5.1925	6.07	6.34667	5.04	5.03	5.06	5.03	5.06333	4.94667	5	5.19667	5.24333	5.67667	5.61	5.655	5.48	5.07	5.87	6.01	6.03	5.04	6.28	5.85	5.86	5.05333	5.11	5.27667	4.56667	5.08	7.75333	7.48667	5.46	6.38333	5.12	5.30667	5.6	5.29	5.8	5.21667	5.26333
220993_s_at	GPR63	G protein-coupled receptor 63 /// G protein-coupled receptor 63	4.28	4.02333	4.04333	3.73	3.85	3.995	3.92	4.43	4.15667	3.94333	3.79	4.18	4.16	4.11333	4.32333	4.23667	4.15667	4.20333	3.92333	4.02	4.465	3.99	3.73333	3.95	3.97	4.15	3.88	4.22333	4.26	3.96	4.15	3.95333	3.86667	3.86667	4.08333	3.70333	4.35	4.08333	4.23	3.67667	4.09	4.02	4.46	4.34	3.84	4.04667	4.00667
221362_at	HTR5A	5-hydroxytryptamine (serotonin) receptor 5A	5.28333	5.24	5.35667	5.33	5.35	5.525	5.00667	5.22	5.27667	4.97333	4.93667	5.55	5.825	5.21	5.13667	5.18333	5.26	5.03333	4.92667	5.25	5.29	5.795	5.00333	4.87667	5.33	6.03	5.33667	5.08667	6.17	5.1	5.92	4.93333	4.78667	4.84333	4.93	4.80333	4.87667	5.06667	5.73	5.13333	5.3	5.06333	5.33	4.72	4.805	5.01333	5.24333
1553016_at	GPR113	G protein-coupled receptor 113	4.7	4.35667	4.50667	4.39	4.825	4.645	4.68333	4.6975	4.3	4.64	4.63	4.64	4.76	4.65667	4.44	4.63667	4.81	4.53	4.5	4.57	4.555	4.53	4.36667	4.66	4.52	4.7	4.48333	4.27667	4.89	4.37667	4.53	4.39	4.63333	4.69667	4.58667	4.30667	4.57667	4.96	5.03	4.55667	4.81333	4.57	5.11	4.57	4.43	4.88333	4.97667
211014_s_at	PML /// LOC161527 /// LOC652671	promyelocytic leukemia /// hypothetical protein LOC161527 /// similar to promyelocytic leukemia protein isoform 9	5.88667	5.47	5.96	6.02	6.135	6.38	5.77667	5.79	6.10333	6.21667	5.91333	5.44	5.63	5.7	5.62333	5.53333	5.59667	5.78667	5.49667	5.83667	5.95	6.21	5.53	5.64333	5.62	5.81	5.48	5.48667	5.87	5.66667	5.52	5.73667	5.89667	5.57333	5.99667	5.65667	5.88667	6.46	6.03	6.19333	6.20667	6.17333	6.27	6.17	6.375	6.42	6.47
1567237_at	OR2L2	olfactory receptor, family 2, subfamily L, member 2	3.71667	4.00667	3.69333	3.85	3.86	3.495	3.82	3.965	3.91333	4.03	3.78667	3.85	3.805	3.98	3.61	3.64667	3.67667	3.68333	3.74333	3.87	3.64	3.745	3.69	3.74333	3.60333	4.04	4.00667	3.69667	4.28	3.86	4.05	3.77	3.93667	3.81333	3.66333	3.7	3.80667	3.99667	3.81	4.16667	4.06667	3.77667	3.98	4.23	3.715	3.84	3.84667
206631_at	PTGER2	prostaglandin E receptor 2 (subtype EP2), 53kDa	3.21667	3.27333	3.32	3.19	3.37	3.05	2.98	3.0875	3.36333	3.27	3.11333	3.08	3.045	3.08667	2.91667	2.86	3.08667	3.17	3.06	3.23333	3.27	3.175	3.12	3.14333	3.17667	3.25	3.07	2.96667	3.52	3.13333	3.48	3.04333	3.22333	3.06	3.76	3.29667	3.17333	3.36333	3.46	3.50667	3.33333	3.29333	3.95	5.02	3.59	4.16333	3.76
224102_at	P2RY12	purinergic receptor P2Y, G-protein coupled, 12	5.66	5.57	3.51	3.92	3.94	3.78	6.55667	4.955	3.6	3.96333	7.50333	3.71	4.8	4.87333	5.92667	5.09	6	5.47333	5.41	4.46	3.3	3.76	7.15	6.51667	6.68	3.51	4.06	5.92333	3.42	5.51667	4.62	7.48	6.63333	6.75667	5.37667	4.69	3.22667	3.77	3.18	3.12667	3.24	3.26333	3.49	3.05	3.255	3.23	4.22333
208311_at	GPR50	G protein-coupled receptor 50	4.50667	4.44333	4.48333	4.43	4.72	4.605	4.60667	4.4375	4.58667	4.57	4.6	4.3	4.7	4.62333	4.30667	4.54	4.69	4.54	4.39333	4.42333	4.555	4.775	4.47	4.73667	4.48	4.74	4.38333	4.46667	4.78	4.51	4.51	4.47667	4.39667	4.60667	4.56	4.46333	4.87333	4.99333	4.95	4.53	4.62667	4.65	4.81	4.24	4.42	4.72667	5.01667
216220_s_at	ADORA1	adenosine A1 receptor	6.88333	7.26	7.05	7.46	7.04	7.01	6.79333	7.355	6.86	6.74333	7.03333	7.09	7.105	7.12	7.14667	7.02333	6.96	7.17333	7.29667	7.21333	6.875	7.025	7.25	7.10667	7.14	7.31	7.16	7.02667	7.12	7.05667	7.47	7.24	7.28333	6.7	6.51	6.58	6.64	6.69	6.94	6.71333	6.86	6.73667	7.18	6.95	6.67	6.6	6.78333
244300_at	LPHN3	Latrophilin 3	4.75667	5.23333	5.54667	4.35	4.675	4.735	4.33333	5.58	4.7	4.66333	4.06333	4.48	4.22	5.00667	5.3	4.53333	4.44667	5.65667	4.73	5.94667	4.605	4.77	5.55	5.19333	5.72333	4.27	4.79	5.34667	4.54	5.89667	4.22	5.46667	4.30667	4.34	5.12333	6.47667	3.86	4.69333	3.98	3.77333	4.02	7.98	3.62	4.14	5.55	3.98667	3.73
1557733_a_at	CHRM3	Cholinergic receptor, muscarinic 3	3.04	3.03333	3.37667	2.99	3.745	3.05	3	3.0225	3.19667	3.25	2.98333	3.14	2.935	3.08	2.79667	2.98	2.85333	3.01	2.86667	3.07667	3.2	3.445	3.04333	2.91	2.80667	3.02	2.91667	2.84	3.35	2.88667	2.91	2.84667	2.99	2.84667	2.88333	2.90333	2.84	3.22333	3.33	3.10667	3	2.91667	3.38	2.8	3.1	2.98	3.42333
210577_at	CASR	calcium-sensing receptor (hypocalciuric hypercalcemia 1, severe neonatal hyperparathyroidism)	5.76	6.00667	5.92333	5.98	5.975	6.035	6.08667	5.785	5.82	5.48333	5.79667	5.36	5.89	5.85667	5.48333	5.51667	5.98333	5.78667	5.49667	6.15333	6.295	6.01	5.76667	5.97333	5.68	5.75	5.42	5.45333	5.8	5.69667	6.01	5.52	5.51333	5.55	5.55667	5.60667	5.65	5.9	6.53	5.90667	6.60333	5.78	6.6	5.52	5.605	5.81333	5.66667
213436_at	CNR1	cannabinoid receptor 1 (brain)	8.37333	7.60333	8.43667	3.83	6.7	6.27	4.24667	7.53	4.68333	4.23	3.4	7.99	7.345	6.10667	6.26	7.56667	7.79667	6.87	4.56667	3.36667	3.335	5.04	4.27333	4.19667	5.47333	7.6	7.73	7.18333	7.15	5.65	4.55	4.25	3.59333	5.26	4.37333	3.59	4.20333	3.50333	3.02	3.22	3.09	3.96333	3.93	7.54	3.93	5.07	4.08
208036_at	OPN1SW	opsin 1 (cone pigments), short-wave-sensitive (color blindness, tritan)	4.07	3.97	3.8	3.8	3.655	3.67	3.71667	3.915	3.73667	3.54	3.82333	3.67	3.91	4.08667	3.94333	4.02333	4.02667	3.90333	3.88	4.05667	3.815	3.735	3.75667	3.85667	3.94333	3.93	3.65333	3.69333	4.07	3.86	3.79	3.64	3.83333	3.95	3.92	3.82333	4.21667	3.96	4.12	3.91333	3.89667	4.32333	4.42	4.21	3.885	4.02667	3.77667
220404_at	GPR97	G protein-coupled receptor 97	4.91	4.66333	5.13667	4.9	5.355	5.28	4.88	4.915	5.03667	5.35	5.01667	4.92	5.065	4.88333	4.70667	5.05667	4.8	4.53667	4.89333	4.69	5.555	5.305	4.69667	4.86	4.65	4.98	4.70667	4.56	4.99	4.69	4.96	4.95667	4.74667	4.84	4.81667	4.93667	5.29	5.36	5.3	4.83667	5.27667	4.84333	5.51	5.46	4.725	5.4	5.37
210473_s_at	GPR125	G protein-coupled receptor 125	6.90333	6.97333	6.56333	7.06	7.62	6.4	7.25667	6.2475	6.48333	6.86333	7.42667	6.9	5.66	6.34667	6.54667	6.52667	6.8	6.80333	6.86	6.87	6.06	5.785	7.11667	7.14667	7.25333	5.29	5.88333	6.86	4.97	6.99333	5.91	6.54333	7.22667	7.65667	5.91667	6.24667	6.73	5.83	6.55	7.00333	6.56667	6.36333	6.11	6.02	6.425	6.45333	6.07667
236281_x_at	HTR7	5-hydroxytryptamine (serotonin) receptor 7 (adenylate cyclase-coupled)	3.51667	3.5	3.44333	3.3	3.34	3.36	3.39	3.49	3.36667	3.23333	3.17333	3.33	3.445	3.25	3.11333	3.27333	3.32667	3.42333	3.47667	4.31333	4.805	4.17	3.42667	3.17	3.5	3.54	3.26	3.25667	3.83	3.37667	3.86	3.06667	3.30333	3.18333	3.54333	3.14	3.33333	3.24	3.44	3.2	3.24667	3.41667	3.78	3.39	3.4	3.20333	3.26667
206079_at	CHML	choroideremia-like (Rab escort protein 2)	3.4	3.46	3.34667	3.38	3.15	3.46	3.43667	3.375	3.34	3.37333	3.52333	3.26	3.515	3.27667	3.22333	3.30333	3.42667	3.39667	3.23	3.44667	3.435	3.515	3.39667	3.54	3.24333	3.51	3.59	3.23333	3.78	3.31667	3.49	3.26333	3.39	3.39667	3.30667	3.34333	3.39	3.59333	3.61	3.46	3.49667	3.41667	3.4	3.5	3.51	3.55667	3.49
210815_s_at	CALCRL	calcitonin receptor-like	3.77333	3.83667	4.14667	4.1	3.52	3.985	4.30333	3.81	3.99667	3.99333	4.35667	4.35	4.355	3.96333	4.04	4.01	4.13	3.85	3.69667	3.98333	3.735	4.14	4.02333	3.95667	4.11	4.02	3.79667	3.84667	4.04	3.98333	4.11	4.07	3.96	4.69	4.11	3.84	4.49333	4.56667	4.73	4.69667	4.67667	4	4.92	4.99	4.205	5.02	5.29
210637_at	TACR1	tachykinin receptor 1	5.75	5.95	5.47667	6.1	5.525	5.65	5.85667	5.9675	5.44667	5.24	5.72667	5.73	5.715	5.93667	4.95667	5.48667	5.6	5.88	5.15667	5.97	5.505	5.71	5.55	5.36	5.65667	6.09	5.78	5.2	5.94	5.42667	6.04	5.41333	5.61	5.36333	5.17	5.09	5.46	5.61	5.91	5.64333	5.89	5.70667	6.32	6.2	5.765	5.49333	5.88333
243389_at	PRB4 /// PRH1 /// PRH2	proline-rich protein BstNI subfamily 4 /// proline-rich protein HaeIII subfamily 1 /// proline-rich protein HaeIII subfamily 2	5.11333	5.42	5.70667	5.29	5.775	5.665	5.50667	5.335	5.41333	5.56	5.38667	5.32	5.34	5.21	5.04	5.31333	5.30333	5.27667	5.17	5.36667	5.765	5.725	5.35333	5.35667	5.22333	5.45	5.13	5.14333	5.43	5.43	5.38	5.16333	5.39	5.26333	5.07667	5.26	5.41333	5.44667	5.65	5.29333	5.75	5.16	5.67	5.41	5.145	5.17667	5.53
207393_at	HCRTR2	hypocretin (orexin) receptor 2	4.27333	4.45	4.24	4.71	4.52	4.315	4.62667	4.27	4.78	4.51667	4.27333	4.3	4.165	4.1	3.92667	4.23333	4.28667	4.39333	4.58333	4.34667	4.505	4.63	4.61	4.18	5.31667	4.35	4.11667	4.18333	4.31	4.33333	5.32	4.09333	3.97333	4.37333	3.92	3.96667	4.06667	4.39333	4.32	4.26667	4.38333	4.3	4.96	4.34	4.135	4.29667	4.21667
239479_x_at	CHRM3	Cholinergic receptor, muscarinic 3	3.20667	3.11667	2.93333	3.26	3.09	3.05	2.97667	3.3	2.99333	3.13333	2.95667	3.52	3.045	3.18667	3.03333	3.24	3.07667	3.07	2.88667	3.28	3.375	3.05	3.04	2.86667	3.10667	2.95	3.07667	2.84667	3.38	3.10333	3.74	2.88	3.09	2.79333	2.76667	2.75333	2.91	2.78333	3.23	2.85667	3.14667	2.99	3.26	3.24	2.995	2.85	3.04667
208376_at	CCR4	chemokine (C-C motif) receptor 4	4.81667	4.65667	4.86333	4.88	5.15	4.84	5.08333	4.82	4.72667	4.91333	4.94333	4.46	4.625	4.93	4.56333	4.73	4.75333	4.69667	4.77	4.79667	4.78	4.97	4.68667	4.88	4.7	5.02	4.86667	4.42	5.05	4.68667	4.49	4.69333	5.11333	5.02667	4.58667	4.69667	4.71	5.15667	5.27	4.88333	5.2	4.75333	5.15	5.07	4.72	5.03333	5.03
210799_at	HTR1B	5-hydroxytryptamine (serotonin) receptor 1B	4.41	4.47333	4.4	4.32	4.825	4.03	4.68	4.55	4.59333	4.87667	4.54667	4.22	4.44	4.77333	4.18333	4.34667	4.63	4.36	4.37667	4.58	5.01	4.8	4.24	4.43	4.11333	4.04	4.35	4.20333	4.38	4.38667	4.35	4.27	4.27667	4.43333	4.29333	4.31	4.52	4.95	4.75	4.56667	4.45667	4.25667	4.67	4.53	4.24	4.54333	4.66667
205545_x_at	DNAJC8	DnaJ (Hsp40) homolog, subfamily C, member 8	8.18333	8.16333	8.26333	8.16	8.345	8.445	8.17	8.0525	8.36	8.26667	8.16333	8.25	8.34	8.35	8.22333	8.22333	8.01	7.95333	8.52333	8.03333	8.275	8.125	8.18667	8.24333	8.32	8.36	8.15667	8.21	8.32	8.30333	8.49	8.25333	8.19333	8.27	8.17667	8.12333	8.36333	8.22667	7.77	7.87667	7.49	8.46667	7.98	8.3	7.995	8.18	8.21667
205220_at	GPR109B	G protein-coupled receptor 109B /// G protein-coupled receptor 109B	3.86	4.09	3.64333	4.23	3.465	3.735	3.96	3.8425	3.74333	3.72	3.97333	3.63	4.025	3.98667	3.82	3.78	4.07333	4.06667	3.87667	3.76667	3.915	3.98	4.01	4.39	3.91333	3.77	4.11333	3.77	4.02	3.76	3.94	4.01333	4.01	4.31667	4.12333	4.6	5.07333	5.77333	3.87	4.19667	3.95667	4.10667	4.46	5.39	7.17	7.63	6.88667
220313_at	GPR88	G protein-coupled receptor 88	10.5733	5.14	10.8567	3.4	9.19	6.955	3.21	10.435	3.56667	3.40333	3.04667	4.54	3.675	3.36667	3.58667	3.60667	4.38667	3.26667	3.31333	3.19	3.335	3.06	3.12667	3.19	3.22667	2.91	2.95333	3.55333	3.11	4.21333	2.98	2.94667	3.41333	3.2	2.86333	2.92	2.85667	3.01	3.04	3.04667	3.21	2.83667	2.97	2.95	2.955	2.86667	3.01333
214615_at	P2RY10	purinergic receptor P2Y, G-protein coupled, 10	3.44	3.32667	3.38333	3.42	3.15	3.215	3.2	3.4275	3.28333	3.21667	3.29667	3.34	3.295	3.31	3.02667	3.24333	3.28667	3.57333	3.14667	3.31	3.125	3.325	3.31333	3.18667	3.30333	3.51	3.28333	3.15667	3.25	3.21333	3.84	3.16333	3.47333	3.17	3.25	3.39333	3.14667	3.23333	3.27	3.54333	3.36667	3.42667	3.41	3.59	4.045	3.60333	3.58
204037_at	EDG2 /// LOC644923	endothelial differentiation, lysophosphatidic acid G-protein-coupled receptor, 2 /// hypothetical protein LOC644923	8.62333	8.33333	7.68667	10.62	9.23	9.23	9.06667	8.9675	8.41	8.58333	9.53	8.38	8.605	8.80667	9.44333	8.48333	8.28	8.73667	9.54	8.66	7.595	8.095	9.52667	9.6	8.82667	6.67	7.11333	9.34333	7.33	9.12333	8.25	9.99667	9.70333	9.57333	8.38333	8.59	8.33667	7.32333	6.88	6.97	6.47333	8.39333	7.83	7.64	7.01	7.02667	6.51333
231757_at	TAS2R5	taste receptor, type 2, member 5	4.54333	4.36	4.58333	4.94	4.285	4.63	4.27667	4.555	4.15667	4.52333	4.34	4.47	4.365	4.31	4.35	4.22	4.27	4.56	4.58333	4.29333	4.225	4.32	4.60333	4.48667	4.50667	4.51	4.75	4.5	4.71	4.25	4.31	4.39333	4.5	4.37	4.47	4.35333	4.27	4.34667	4.9	4.3	4.36667	4.25	4.85	4.41	4.565	4.14333	4.45
1555651_at	OR10A5	olfactory receptor, family 10, subfamily A, member 5	4.46667	5.16667	4.52667	4.55	4.81	4.38	5.01667	4.8475	4.23333	4.38	4.93	4.62	4.79	4.93667	4.47667	4.45	5.19	4.66333	4.63	5.16	4.57	4.475	4.60667	5.18667	4.74667	4.56	4.72	4.47333	4.84	4.77667	4.48	4.67333	4.61667	4.82667	4.91	4.60333	4.64667	5	5.17	5.06333	5.31333	4.59667	5.44	4.73	4.57	5.03333	5.01667
217119_s_at	CXCR3	chemokine (C-X-C motif) receptor 3	5.69667	5.42	5.90333	5.68	5.63	5.695	5.22667	5.585	5.9	5.60667	5.34667	5.39	5.385	5.47667	5.12	5.48667	5.10667	5.61333	5.22	5.44667	5.765	5.8	5.39333	4.88667	5.13	5.96	5.32	5.23333	5.68	5.44	5.55	5.29333	5.41	4.96333	4.79	4.95333	5.31	5.21333	6.05	5.18333	5.59	5.45	5.94	5.5	5.665	5	5.80667
226423_at	PAQR8	progestin and adipoQ receptor family member VIII	7.90333	7.99	7.53667	9.38	8.485	7.965	8.77333	7.8225	8.37333	8.68	9.13333	7.56	8.045	8.14333	8.30667	7.98	8.04667	8.53667	8.64	8.43	8.11	8.28	8.83667	8.70667	8.3	7.13	7.74	8.41333	7.34	8.62333	8.14	9.17	9.18667	9.01667	7.86333	7.70333	5.58333	6.32667	5.88	5.91667	5.93333	5.96667	6.16	5.88	6.05	6.17667	5.78667
231741_at	EDG3	endothelial differentiation, sphingolipid G-protein-coupled receptor, 3	4.43333	4.57	4.69	4.91	5.355	4.89	4.63667	4.5075	4.95	5.04667	4.85333	4.39	4.5	4.72333	4.54	4.66	4.50667	4.40667	4.63333	4.61	5.04	5.165	4.51333	4.75667	4.44	4.43	4.33333	4.41667	4.75	4.57667	4.74	4.59667	4.42667	4.74667	4.46333	4.26667	4.83333	4.80667	5.01	4.81	5.03667	4.45667	5.11	4.35	4.375	4.42667	4.99667
206429_at	F2RL1	coagulation factor II (thrombin) receptor-like 1	5.32333	5.30667	5.56	5.29	5.525	5.445	5.40667	5.125	5.42667	5.33	5.33	5.08	5.255	5.22	5.07333	4.92	5.34333	5.06	5.1	5.09333	5.65	5.595	5.10333	5.37667	5.2	5.3	5.13333	4.96667	5.48	5.01	5.27	5.07333	5.29333	5.25667	5.24667	5	5.05333	5.63	5.23	5.45333	5.72333	5.25667	5.73	5.52	5.515	5.48667	5.29333
207400_at	NPY5R	neuropeptide Y receptor Y5	5.47333	4.87667	4.96333	4.34	4.78	4.4	4.75333	5.18	4.6	4.47333	4.52667	4.86	5.18	4.72333	4.63	4.83333	5.03333	4.68333	4.53	4.62	4.37	4.72	4.53333	4.81	4.67667	4.42	4.33667	4.67333	4.3	4.56667	5	4.48	4.49	4.92	4.70667	4.33333	5.23	4.74667	4.5	4.56333	4.75	4.98667	4.82	4.39	4.535	5.18	5.64667
231201_at	PTGER1	Prostaglandin E receptor 1 (subtype EP1), 42kDa	4.84	4.84	5.01667	5.34	5.035	5.065	4.40667	5.105	5.05333	5.19333	4.81333	5.06	5.05	4.93667	4.74	4.93	4.61	4.92333	4.80333	4.8	5.12	5.085	4.85	4.66333	4.64	5.52	4.57667	4.73333	5.55	4.96	5.56	4.69667	4.61	4.58667	4.55667	4.76667	5.38667	5.16	5.49	4.87	5.03333	5.05333	5.86	5.49	5.235	4.99	5.58
221365_at	MLNR	motilin receptor	3.11333	3.06333	2.84	3.39	2.835	3.165	3.08	3.1275	2.95	3.2	3.04333	3.07	3.12	3.08333	2.85667	2.93667	3.05	3.13333	3.05667	3.06333	3.28	3.125	2.92667	2.98333	3.05	3.15	2.93	2.92333	3.16	2.90333	3.06	2.96667	3.28667	2.87667	2.96333	2.90667	3.14333	3.02333	3.25	3.19	3.15333	2.99667	3.33	3.13	3.035	3.02	3.07667
221369_at	MTNR1A	melatonin receptor 1A	4.2	4.14	4.17333	4.5	4.375	4.31	4.33333	4.24	4.31	4.33	4.27333	4.26	4.29	4.33	4.01333	4.22333	4.19667	4.32667	4.07667	4.33	4.2	4.33	4.14333	4.31667	4.23	4.75	4.69	4.03333	4.9	4.18667	4.16	4.12333	4.21667	4.32667	4.42333	4.32667	4.38333	4.35667	4.49	4.23333	4.21333	4.37333	4.31	4.52	4.2	4.34667	4.29333
205440_s_at	NPY1R	neuropeptide Y receptor Y1	5.79333	4.38667	5.47333	3.28	3.98	4.07	3.74	5.5675	4.04	3.53333	3.93667	6.07	5.075	5.16667	4.87	5.29	5.77667	4.77667	3.54333	3.77333	3.37	3.625	4.41	4.18667	4.60667	3.59	3.37333	5.07667	3.53	4.74333	4.47	3.78333	3.87333	4.37333	4.57	3.98333	7.39	3.77	3.46	4.46333	3.22667	7.76667	6.99	4.53	4.975	6.82333	7.41
206083_at	BAI1	brain-specific angiogenesis inhibitor 1	6.24333	6.38	6.40333	6.02	6.015	6.12	5.43667	6.2875	6.22	5.98667	5.55	6.43	5.935	6.31333	5.93	6.24667	6.08	5.96667	6.06	6.05	6.575	6.23	5.81667	5.56667	5.63667	6.22	5.71667	5.97667	6.12	5.84667	6.17	5.63	5.47	5.60333	5.39333	5.38667	5.45	5.60667	5.54	5.59667	5.56333	5.51	6.29	5.57	5.395	5.38333	5.74667
221169_s_at	HRH4	histamine receptor H4	3.63	3.77667	3.53333	3.6	3.32	3.38	3.83	3.7225	3.3	3.20667	3.56333	3.33	3.755	3.76333	3.37667	3.6	3.94	3.97333	3.55	3.88667	3.24	3.32	3.57667	3.64	3.91333	3.65	3.74333	3.49667	3.9	3.59333	3.2	3.52667	3.85	3.75667	3.70667	3.69333	3.6	3.87	3.74	3.73	3.66667	3.85	3.75	3.03	3.67	3.73667	3.71333
241038_at	CHRM3	Cholinergic receptor, muscarinic 3	4.83667	4.65333	4.82	4.64	4.74	4.455	4.34	4.7925	4.7	4.66667	4.3	4.66	4.685	4.62667	4.30333	4.33667	4.50333	4.49333	4.3	4.57333	5.06	4.655	4.26667	4.20333	4.34333	4.82	4.31333	4.18667	4.56	4.61	4.78	4.25333	4.48333	4.13	4.05667	4.16333	4.43333	4.38667	4.78	4.55	4.98667	4.44333	5.34	4.95	4.41	4.37667	4.41
1567273_at	OR2K2	olfactory receptor, family 2, subfamily K, member 2	3.72333	3.69333	3.65333	3.52	3.655	3.9	3.74333	3.79	3.95667	4.26667	3.52	3.65	3.69	3.73667	3.65333	3.39	3.67667	3.73	3.4	3.65333	3.765	4.255	3.66667	3.74	3.74667	3.32	3.61	3.52	3.83	3.47	3.64	3.63667	3.66	3.65	3.39333	3.42667	3.56333	3.57333	3.64	3.59333	3.73	3.55	3.83	3.25	3.365	3.56	3.68667
204897_at	PTGER4	prostaglandin E receptor 4 (subtype EP4)	3.13	3.83667	3.50333	4.16	3.435	3.565	3.77667	3.47	3.95667	3.88667	4.51667	3.34	3.105	3.46	3.31667	3.09667	3.73333	3.33333	3.46333	3.38	3.795	3.655	4.2	4.39	3.8	2.87	3.43333	3.46667	3.51	4.67667	3.99	4.32	3.71667	5.11667	7.21667	6.22	5.71	5.24667	6.02	5.60333	6.97333	7.26	7.51	5.84	6.125	7.75667	6.72333
207135_at	HTR2A	5-hydroxytryptamine (serotonin) receptor 2A	5.83667	6.58333	6.03	5.33	5.165	5.585	5.79667	5.095	6.68333	6.83333	4.87	8.38	8.185	7.74	8.15333	8.65	8.17333	6.55667	5.62667	5.83	5.46	5.44	5.43667	5.99333	5.61667	4.87	4.76667	7.97667	4.39	5.58333	5.11	5.28667	4.94	5.52	4.61	4.29667	5.20667	4.94	4.03	4.44333	4.36333	6.7	5.67	4.84	4.57	4.48667	4.29667
205098_at	CCR1	chemokine (C-C motif) receptor 1	5.23667	5.13667	4.70333	4.52	4.755	5.225	6.24667	4.9275	4.69667	4.77	6.65667	4.64	4.525	5.30667	4.93333	4.94333	5.1	5.39667	5.27333	5.37667	4.365	4.98	5.69333	5.88667	5.61667	4.14	4.8	4.94	4.74	5.72	4.44	6.15333	6.03333	6	5.86	5.57667	4.40333	5.41	4.74	4.98	4.82333	5.19	4.53	6.37	5.255	5.51	5.39333
207555_s_at	TBXA2R	thromboxane A2 receptor	6.20333	6.33333	5.86	6.02	5.785	6.07	5.68	6.3	6.14333	6.01	5.51667	5.91	5.845	6.05	5.86667	5.59	5.94333	5.87667	5.75333	5.67333	6.025	5.995	5.74	5.80667	5.62333	6.59	5.89333	5.97667	6.49	5.82333	6.07	5.79	5.78333	5.31	5.49333	5.83333	6.02	5.96	6.33	5.85667	5.96	6.21	6.7	6.1	5.84	5.78667	5.75667
234765_at	BAI3	Brain-specific angiogenesis inhibitor 3	4.47667	4.71333	4.65667	4.4	4.555	4.535	3.76333	4.6925	4.59333	4.29667	4.03667	4.09	3.93	4.71667	5.28	5.3	4.80667	4.54	4.11667	4.01	3.93	3.995	3.98333	4.12667	4.03	5.74	6.63	4.92333	4.61	4.10333	3.55	3.85333	4.23333	3.86333	4.70333	4.29	3.57	3.88667	3.4	3.37	3.55	3.34667	3.46	3.4	3.4	3.32	3.45667
221442_at	MC3R	melanocortin 3 receptor	4.10667	4.15	4.46667	4.14	4.775	4.69	4.17	4.27	4.65667	4.74	4.25667	4.54	4.39	4.11333	4.21333	4.12667	4.34	4.13	4.22	4.01667	4.94	4.6	4.18333	4.11	4.11333	4.45	4.15	4.01667	4.07	4.01667	4.1	4.03	4.15333	4.20333	4.31667	4.17333	4.62667	4.55667	4.57	4.28333	4.36	4.30333	4.84	4.58	4.35	4.36333	4.93667
206455_s_at	RHO	rhodopsin (opsin 2, rod pigment) (retinitis pigmentosa 4, autosomal dominant)	5.68333	5.66	5.71667	5.76	6.035	5.815	5.77667	5.7725	5.47333	5.98667	5.65333	5.57	5.57	5.80333	5.41667	5.47667	5.71667	5.71333	5.48	5.78	6.04	6.07	5.64333	5.80333	5.58	5.39	5.72	5.46667	5.81	5.62	5.63	5.53667	5.76667	5.52667	5.46667	5.50333	5.56	5.81333	5.9	5.79333	5.96333	5.7	5.97	5.6	5.6	5.78	5.74667
221170_at	HRH4	histamine receptor H4	2.68667	2.76667	2.79667	2.71	2.69	2.65	2.81333	2.67	2.53	2.62	2.91333	2.54	2.865	2.67	2.63333	2.66667	2.73333	2.72	2.69667	2.68333	2.52	2.62	2.63667	2.82	2.74667	2.77	2.80667	2.64667	2.82	2.77333	2.51	2.67667	2.77667	2.79333	2.81	2.67333	2.75	2.68	2.65	2.7	2.63	2.67667	2.7	2.66	2.665	2.93	2.75333
208314_at	RRH	retinal pigment epithelium-derived rhodopsin homolog	5.09667	5.18333	4.82333	4.65	4.96	4.54	4.95667	4.945	4.88333	4.76	4.76	4.79	4.695	5.35667	4.76333	4.78667	5.00333	4.98667	4.73333	4.83	5.05	5.075	4.74	5.05667	5.15	5.32	4.95	4.78667	5.32	4.87	5.16	4.73333	4.99	4.97667	4.85667	4.72333	4.92667	5.16333	5.17	4.79333	5.02667	4.81667	5.34	4.87	4.825	5.07333	4.72333
219134_at	ELTD1	EGF, latrophilin and seven transmembrane domain containing 1	4.65667	4.26667	4.18667	5.2	4.565	4.755	4.82667	4.23	4.53333	4.75333	5.09667	4.59	4.085	4.29333	4.42	4.49333	4.32	4.36333	4.56	4.33667	4.65	4.17	4.67	4.61667	4.56333	3.84	4.20333	4.38333	4.08	4.51	4.71	5.36333	4.57333	4.54	5.37333	5.31333	6.03333	6.91333	6.09	6.58	7.09667	6.37	7.34	9.03	6.8	8.34	7.90333
207111_at	EMR1	egf-like module containing, mucin-like, hormone receptor-like 1	4.75	4.93667	5.11333	4.79	4.88	4.96	5	4.8575	4.94667	4.95333	4.9	4.56	5.01	4.82333	4.47667	4.73333	4.89333	4.83	4.68333	4.84667	4.925	5.2	4.69333	4.96667	4.71333	4.94	4.87333	4.55667	4.76	4.62667	4.47	4.69667	4.74	4.85333	4.79333	4.82	5.13667	5.39	4.93	4.99333	5.17667	5.00333	5.13	4.73	4.86	5.09667	5.33
206638_at	HTR2B	5-hydroxytryptamine (serotonin) receptor 2B	2.87667	2.82667	3.45667	2.74	3.335	3.46	3.07	2.945	3.02667	3.13333	3.20333	2.78	2.855	2.81	2.79667	2.90333	2.93667	2.97333	2.88333	3.11333	3.1	2.915	3.01667	3.04667	3.07	2.75	2.78	2.85333	3.09	3.06	3.28	3.09	2.87667	2.97333	2.98333	2.94	3.46333	3.31333	3.32	4.81333	3.47667	4.95	4.22	3.3	3.165	3.24333	3.94
231925_at	P2RY1	Purinergic receptor P2Y, G-protein coupled, 1	5.91333	4.92	5.62333	3.94	4.435	4.76	4.00667	5.88	3.79667	3.75	3.89667	4.19	3.075	4.04	4.35667	4.00333	4.18667	4.79667	3.82667	3.88333	3.475	2.99	3.90333	4.17	4.39667	3.11	2.84	4.82	2.91	4.67333	3.09	3.85667	4.79667	5.19333	5.16	6.08	3.17333	3.25	3.5	3.49667	3.64333	3.25333	2.79	3.35	3.485	3.28667	2.79
210279_at	GPR18	G protein-coupled receptor 18	3.20667	3.34333	3.28333	2.96	3.245	3.145	3.25667	3.2625	3.28333	3.24333	3.23333	3.02	3.185	3.16667	3.02667	3.00333	3.07	3.34667	3.13667	3.13667	3.235	3.005	3.07	3.3	3.24667	3.26	3.13	3.04	3.15	3.15333	3	3.03667	3.25667	3.10667	3.09667	3.38333	3.05333	3.38333	3.42	3.32667	3.33333	3.25333	3.36	3.21	4.11	3.49667	3.9
237904_at	ADORA3	Adenosine A3 receptor	3.21667	3.27333	3.18667	3.07	3.415	3.41	3.3	3.0425	3.23	3.32	3.91	3.27	2.935	3.22333	3.27	3.04667	3.02	3.03	3.01	3.04667	3.29	3.425	3.30667	3.51	3.04667	3.02	2.91667	3.02667	3.01	3.16	2.89	3.94333	3.45667	3.45333	3.44	3.17333	3.02333	3.03	2.81	2.97333	3.06	2.89667	2.88	2.95	2.91	2.9	3.03
1567065_at	OR1Q1	olfactory receptor, family 1, subfamily Q, member 1	5.53333	5.58333	5.64667	5.6	5.62	5.425	5.48333	5.3975	5.37	5.25	5.76333	5.48	5.555	5.36333	5.34667	5.65	5.56	5.47	5.56667	5.41667	5.67	5.58	5.25	5.60333	5.39333	5.69	5.51	5.29333	5.78	5.26	5.23	5.43333	5.46	5.66	5.44333	5.37333	5.49	5.81667	5.65	5.56667	5.85667	5.33333	5.68	5.42	5.275	5.44667	5.66333
1567657_at	OR2H1	olfactory receptor, family 2, subfamily H, member 1	2.64333	2.61	2.73333	2.66	2.61	2.735	2.69333	2.635	2.89333	2.71667	2.71	2.59	2.665	2.60667	2.6	2.60667	2.63667	2.75	2.77	2.67333	2.83	2.57	2.56333	2.68	2.59	2.6	2.73333	2.54333	2.71	2.67333	2.73	2.6	2.69	2.63667	2.56	2.52	2.6	2.76667	2.7	2.62333	2.59333	2.66	2.68	2.96	2.555	2.85	2.69
1553067_a_at	GNRHR2	gonadotropin-releasing hormone (type 2) receptor 2	4.28333	4.11667	4.62667	4.42	4.535	4.34	4.38	4.28	4.32	4.61667	4.39	4.12	4.4	4.36667	4.09667	4.16	4.38667	4.20333	4.10333	4.15333	4.875	4.46	4.14333	4.27667	4.32	4.47	4.14667	3.94667	4.37	4.16667	4.18	4.05	4.17	4.28	4.22333	4.16333	4.24333	4.61	4.26	4.04	4.2	4.52333	4.56	4.28	4.085	4.24	4.39667
1570575_at	GPR177	G protein-coupled receptor 177	2.77333	2.80667	3.07	2.94	3.175	3.42	2.79333	2.74	3	3.51333	2.89667	2.85	2.905	2.95333	2.74	2.88	2.86	2.81333	2.82	2.89333	3.395	3.095	2.79	2.8	2.77	2.8	2.79	2.78333	2.73	2.74	2.88	2.78	2.89333	2.92667	2.68333	2.67667	2.84	2.94333	2.81	2.8	2.78333	2.83333	3.1	2.86	2.725	2.85667	3.03333
1567250_at	OR10A3	olfactory receptor, family 10, subfamily A, member 3	3.75	3.75	3.97	3.65	3.805	3.86	3.59	3.5875	3.63333	4.08333	3.44	3.49	3.485	3.48	3.52	3.44333	3.6	3.58	3.67333	3.47333	3.905	3.67	3.63	3.54	3.56667	3.73	3.59333	3.53667	4.02	3.46	3.75	3.69333	3.52	3.71333	3.49	3.53667	3.52667	3.78333	3.92	3.74	3.82667	3.6	4.06	3.89	3.575	3.68333	3.56667
221351_at	HTR1A	5-hydroxytryptamine (serotonin) receptor 1A	5.04	4.99667	5.19333	5.31	5.105	5.28	4.96	5.28	5.03333	5.17333	5.26333	5.17	5.18	5.12333	4.90667	4.71333	5.31333	5.25333	5.11333	5.05333	5.395	5.305	5.10333	4.93333	5.23667	5.7	5.02333	4.9	5.57	5	5.12	4.94667	5.1	4.78	5.00333	4.88333	5.33667	5.44667	5.23	5.07667	5.50667	5.12667	6.18	5.4	5.105	5.21333	5.48333
208509_s_at	OR7A17	olfactory receptor, family 7, subfamily A, member 17 /// olfactory receptor, family 7, subfamily A, member 17	4.32	4.20333	4.62333	4.41	4.135	4.355	4.25333	4.2875	4.51667	4.23333	4.47667	4.45	4.645	4.27	4.21333	4.37333	4.34	4.35333	4.35333	4.16333	4.36	4.63	4.21	4.32667	4.13	4.32	4.45333	4.12333	4.5	4.26333	4.31	4.29333	4.42	4.27333	4.33667	4.44333	4.6	4.66667	3.88	4.26333	4.13667	4.56	4.51	4.42	4.345	4.50333	4.52667
230369_at	GPR161	G protein-coupled receptor 161	3.38	4	3.32667	3.85	3.22	3.265	4.91667	3.4275	5.04333	5.16333	3.56	3.96	3.515	3.97	4.48	4.12333	3.69667	3.95	3.56	4.39	4.245	3.9	3.86667	3.95333	3.93333	3.75	3.74333	3.93667	3.25	3.97	3.57	3.85	3.83667	3.93333	5.58	5.12667	4.88	4.05667	3.5	3.82	3.68667	4.84667	3.55	3.74	3.575	3.75667	3.35
224554_at	GHSR	growth hormone secretagogue receptor	4.34667	4.35	4.76	4.73	4.285	4.25	4.18	4.6	4.29667	4.53667	4.36667	4.44	4.49	4.46333	4.05	4.29333	4.22	4.41333	4.36333	4.49	4.015	4.545	4.26667	4.33333	4.31333	4.43	4.56667	4.25	5.02	4.45333	4.55	4.27667	4.57	4.42333	4.41	4.36	4.8	4.9	4.58	4.27333	4.54333	4.42	4.75	4.54	4.39	4.54	4.46667
206126_at	BLR1	Burkitt lymphoma receptor 1, GTP binding protein (chemokine (C-X-C motif) receptor 5)	4.74	4.51	4.86	4.77	5.145	4.45	4.46667	4.8125	4.7	4.95333	4.75667	4.63	4.81	4.47667	4.3	4.68667	4.36333	4.48667	4.37667	4.76667	5.055	4.8	4.57333	4.39333	4.47	4.78	4.31667	4.40667	4.49	4.47667	4.72	4.40333	4.42667	4.36	4.16667	4.37333	4.55667	4.81	5.06	4.60333	4.81333	4.99667	5.22	4.53	4.94	4.49667	5.38333
210264_at	GPR35	G protein-coupled receptor 35	6.22333	6.21	6.21667	6.23	6.575	6.33	6.27333	6.4475	6.18667	6.27333	6.38333	6.12	6	6.5	6.18667	6.5	6.32667	6.13	6.26333	6.31	6.395	6.19	6.17333	6.54	6.2	6.27	6.29667	6.18333	6.25	6.37333	6.31	6.08333	6.24333	6.35667	6.56333	6.40667	6.45333	6.78	6.35	6.25333	6.54	6.16667	6.71	6.42	6.02	6.57	6.39333
224131_at	GPR81	G protein-coupled receptor 81	3.51	3.15	3.59	3.37	3.455	3.71	3.43667	3.3	3.60333	3.48333	3.37333	3.04	3.48	3.30667	3.30667	3.32333	3.47	3.36667	3.27333	3.43667	3.365	3.765	3.24333	3.40333	3.34667	3.31	3.33333	3.26667	3.56	3.34	3.18	3.33667	3.24333	3.37333	3.61667	3.48333	3.50333	3.65667	3.49	3.48	3.75667	3.4	3.9	3.42	3.6	3.97667	3.94667
204028_s_at	RABGAP1	RAB GTPase activating protein 1	8.58667	8.83333	8.40667	8.87	8.43	8.37	8.70667	8.72	8.65667	8.45333	8.52333	8.77	8.54	8.92	8.89667	8.8	8.67	8.72	9.38333	8.48333	8.005	8.165	8.62	8.68333	8.57667	8.05	8.30667	8.97333	8.2	8.82333	8.51	8.73667	8.82667	8.52333	8.95667	9.01	8.91667	8.7	7.7	8.00333	7.83333	9.17	8.06	8.18	8.51	8.26667	7.79333
243421_at	TACR1	Tachykinin receptor 1	2.55333	2.47	2.54667	2.44	2.785	2.625	2.43333	2.475	2.86	2.74333	2.44	2.54	2.505	2.48333	2.36667	2.40667	2.46333	2.53667	2.47	2.44333	2.665	2.715	2.42	2.37667	2.46333	2.36	2.55333	2.41333	2.45	2.43	2.44	2.42333	2.48667	2.39	2.53	2.54	2.54667	2.58	2.47	2.49333	2.52	2.48667	2.5	2.78	2.425	2.56667	2.50667
1565389_s_at	GRM5	glutamate receptor, metabotropic 5	4.84	4.80667	5.04333	5.06	5.245	4.985	4.59333	4.98	4.97667	4.86	4.8	5.06	4.915	4.90333	4.69	4.62333	4.72333	4.79667	4.66333	4.93333	5.04	5.44	4.55333	4.80333	4.67667	4.39	4.74	4.79	4.79	4.64333	4.89	4.55667	4.61	4.52333	4.58667	4.54333	5.35	5.06333	4.83	4.71333	4.94333	4.98333	4.95	5.13	5.05	5.13	5.04333
214491_at	SSTR3	somatostatin receptor 3	6.13333	5.90333	6.20667	6.07	6.175	6.22	5.78	6.2625	6.22333	6.47	6.04667	6.12	5.94	6.19	5.66333	5.99	5.94667	6.05667	5.85333	6.02333	6.595	6.575	5.99	5.90333	5.94667	6.5	5.96333	5.79667	6.54	5.95667	6.54	5.79667	6.01	5.69	5.57333	5.76333	6.02667	6.14	6.65	5.81	6.23667	6.03667	6.68	6.29	6.11	5.96	6.21
208520_at	OR10H3	olfactory receptor, family 10, subfamily H, member 3	5.28667	5.55333	5.65333	5.01	5.355	5.165	5.57667	5.1575	5.15	4.98333	5.27667	5.02	5.435	5.26333	4.94333	4.97333	5.49	5.31667	5.18667	5.34667	5.56	5.42	5.22	5.6	5.26667	5.36	4.94667	5.02	5.57	5.01333	5.12	5.07	5.10667	5.34	5.13667	5.03	4.97333	5.62333	5.87	5.41333	5.79	5.05	5.69	5.16	4.905	5.54333	5.26667
242123_at	PAQR7	progestin and adipoQ receptor family member VII	5.55667	5.96	5.76	5.59	5.53	5.465	5.66667	5.9375	5.80333	5.68333	5.72333	5.49	5.395	5.79667	5.37333	5.36	5.52667	5.59	5.86	5.63333	5.41	5.78	5.62333	5.65667	5.41	5.92	5.65	5.33333	5.62	5.89333	5.41	5.49333	5.92333	5.69333	5.65	5.83667	5.86667	6.14	5.27	5.32667	5.16667	5.91667	6.05	5.69	5.78	5.73	5.15333
216288_at	CYSLTR1	cysteinyl leukotriene receptor 1	2.98333	3.11667	3.02	3.07	2.975	3.115	3.11667	3.0975	3.00333	3.30667	3.12333	3.13	2.885	3.04333	3.09	2.99333	3.09667	3.22	3.10333	3.01667	3.035	2.87	3.20667	3.11333	3.03333	3.02	3.05	3.06667	3.27	3.08	2.98	3.2	3.1	2.98	2.92333	3.46667	2.91	3.06667	3.2	3.04333	3.02667	3.05333	3.31	2.92	3.245	3.10667	3.27333
203488_at	LPHN1	latrophilin 1	9.44667	9.73	8.08667	7.99	7.825	7.76	8.27667	9.5425	7.69	7.69	8.11333	9.3	8.865	9.36333	9.41667	10.0233	9.56333	9.37	9.19	9.09	8.34	7.91	8.20333	8.32333	8.44	9.16	9.92	9.3	9	8.64333	8.01	8.40667	8.36667	8.57	7.62	7.51	7.18	7.56333	7.17	7.14	7.03	7.48	7.34	7.12	7.35	7.59667	7.81667
214546_s_at	P2RY11	purinergic receptor P2Y, G-protein coupled, 11	4.90333	4.73333	4.86333	4.79	5.125	5.195	4.36333	4.89	4.81	5.13667	4.59	4.85	4.595	4.76667	4.35667	4.71333	4.52	4.54333	4.57333	4.63333	4.91	5.07	4.39333	4.57333	4.51	5.01	4.35667	4.38333	4.68	4.62333	4.78	4.41667	4.59667	4.25333	4.36	4.54667	4.88333	4.73333	4.61	4.44667	4.56333	4.87	5.16	4.52	4.495	4.44	5.09333
207548_at	GRM7	glutamate receptor, metabotropic 7	3.93	4.37333	3.72667	3.46	3.33	3.595	3.44333	3.7525	3.35667	3.08667	3.13667	4.6	4.385	4.21333	3.83	4.4	5.01667	4.55667	3.80667	5.18333	4.345	4.425	3.81667	3.62	4.39333	3.31	3.33333	4.07333	3.56	4.32	3.35	3.37333	3.23	3.65667	3.71667	3.5	3.2	3.29333	3.06	3.06333	3.22667	3.24667	3.26	3.16	3.09	3.10333	3.05667
221958_s_at	GPR177	G protein-coupled receptor 177	7.74333	8.20667	8.39333	7.66	8.48	8.455	8.13667	7.525	8.31667	8.17	8.32333	7.92	7.035	7.49333	7.51333	7.70667	7.79333	7.57667	8.27667	9.10333	8.635	8.005	7.96	7.98333	8.05	6.08	6.04333	7.95667	5.33	8.10333	7.73	7.23667	8.05	9.06333	8.21	8.05333	7.77333	7.18	7.81	7.71667	7.19	7.68	7.05	7.19	7.77	7.47333	6.98667
1561104_at	GPR116	G protein-coupled receptor 116	3.98	4.06333	4.35667	4.17	4.24	4.025	4.17	3.9525	4.11	4.22667	4.23667	4.1	4.455	4.21	3.93	4.16667	4.2	4.11	4.23667	4.13667	4.13	4.3	4.15667	4.38333	4.12667	4.41	4.05	3.93	4.34	3.99333	4.16	3.92667	4.12667	4.30667	4.13667	3.94333	4.36667	4.42	4.18	4.07	4.28667	4.34333	4.33	4.15	3.985	4.32667	4.34333
214556_at	SSTR4	somatostatin receptor 4	5.27	5.21	5.7	5.37	5.61	5.725	5.41333	5.4325	5.62667	5.63667	5.28	5.38	5.32	5.49333	4.94333	5.33667	5.41333	5.18667	5.20667	5.17	5.61	5.45	4.98667	5.17	4.91	5.14	4.85667	4.96333	5.2	5.15	5.03	5.10667	5.12667	5.07667	5.05667	4.97667	5.2	5.51	5.86	5.51667	5.65667	5.03	5.96	5.25	4.945	5.31	5.15
221354_s_at	MCHR1	melanin-concentrating hormone receptor 1	4.73667	4.71667	4.79667	4.76	5.055	5.185	4.91333	4.6675	5.14	4.91667	4.68667	4.93	5.295	4.77667	4.76	5.26667	5.08333	4.73	4.85333	4.64333	5.13	5.175	4.67	4.88667	4.62	4.92	4.51	4.7	5.04	4.70333	5.06	4.81333	4.61667	4.89333	4.64333	4.65667	5.16333	5.13333	4.69	4.78	4.74667	4.89333	4.81	4.32	4.705	4.75667	5.22
204273_at	EDNRB	endothelin receptor type B	7.42667	6.55	7.23	7.08	7.86	7.025	8.06667	6.5525	7.68	7.71667	7.70333	6.72	4.555	5.59333	6.16	5.79667	6.84333	6.40333	6.71333	6.96333	6.585	6.22	7.66333	7.11667	8.22667	5.02	5.44667	6.60333	4.5	8.33333	6.91	6.11333	6.24	9.52	8.43	8.05	4.70333	4.39	4.58	5.59	5	4.54	4.08	7.27	5.535	6.36	5.84667
212951_at	GPR116	G protein-coupled receptor 116	6.72333	6.67667	6.93667	6.88	6.85	6.91	7.17333	6.695	6.90667	7.06667	6.98333	6.59	6.6	6.90333	6.62333	6.65333	6.84333	6.87333	6.89667	7.41667	7.125	7.14	7.38	6.79667	6.94333	5.48	5.94	6.89667	5.9	7.07667	6.1	7.32	6.54333	6.37	6.64	7.05667	6.68	7.68667	8.49	8.52	9.21333	7.74	8.42	8.53	7.785	8.81333	8.59333
213880_at	LGR5	leucine-rich repeat-containing G protein-coupled receptor 5	3.56	3.50667	3.51	6.57	3.64	4.23	5.16	3.4475	4.55333	4.92	6.39	4.15	5.38	4.19333	5.07	4.18667	3.73667	4.21667	4.83	3.61	3.375	3.955	5.86	5.39333	4.97667	3.25	3.38	5.06	3.05	5.07667	4.43	6.06667	6.25	5.88667	7.71667	6.40333	3.66	3.07333	3.63	3.12333	3.13	2.86	3.47	2.67	2.92	3.18667	3.43
221394_at	TAAR2	trace amine associated receptor 2	4.53333	4.44333	4.51667	4.24	4.565	4.095	4.45667	4.2625	4.51333	4.11333	4.44333	4.26	4.785	4.48333	4.45667	4.34	4.32	4.43667	4.20667	4.43333	4.275	4.17	4.43667	4.54333	4.65667	5.18	4.73	4.37333	4.85	4.34333	4.1	4.4	4.38667	4.58333	4.51667	4.53333	4.59667	4.79333	4.57	4.44667	4.44	4.31333	4.98	4.52	4.44	4.57	4.64333
216235_s_at	EDNRA	endothelin receptor type A	4.62	4.70333	4.69667	4.84	5.045	4.935	5.15667	4.8275	4.58667	4.96	5.23	4.33	4.95	4.97333	4.76667	4.78333	4.73333	4.67333	4.63333	4.62667	5.22	4.955	4.93	5.06333	4.84	4.86	4.67667	4.63	4.61	4.88667	4.78	4.90667	4.58333	4.87667	5.61333	5.14333	5.62667	5.52667	6.63	7.05667	5.95	5.97667	6.57	6.42	5.82	5.51	5.63667
220756_s_at	GPR172B	G protein-coupled receptor 172B	4.61333	4.75667	4.56	4.75	4.695	4.265	4.67333	4.8075	4.55333	4.67	4.60667	5	4.695	4.52667	4.33667	4.55667	4.67667	4.73667	4.5	4.50333	4.54	4.555	4.59333	4.40667	4.56667	4.78	4.64	4.37	5.42	4.58667	4.83	4.35	4.48667	4.46	4.26	4.52	4.51	4.63667	4.94	4.39	4.54333	4.77333	5.42	4.72	4.815	4.46667	4.74
204451_at	FZD1	frizzled homolog 1 (Drosophila)	5.83667	5.53667	5.22667	5.1	5.075	4.86	5.37333	5.645	5.03333	4.94667	5.57	5.35	4.835	5.17333	5.01667	5.15667	5.42333	5.58333	4.98	5.40333	4.89	4.865	5.32667	5.27333	5.56	6.29	5.84667	5.06667	6.24	5.42667	5.34	5.37333	5.27667	5.20667	7.84667	7.54667	8.35	6.28333	7.06	7.20333	6.42333	7.40667	6.88	6.62	6.495	6.31667	5.81333
210374_x_at	PTGER3	prostaglandin E receptor 3 (subtype EP3)	5.00667	5.02	4.83667	5.12	4.62	4.67	5.03667	5.12	4.68	4.83667	4.96667	4.79	5.07	5.03	4.82	4.79333	4.85	4.84333	4.83	5.04333	4.855	4.44	4.92667	4.96333	4.96667	4.92	4.94667	4.72333	5.29	5.00333	4.88	5.02333	4.84	4.78	5.04333	4.72	5.94333	5.81	5.58	5.11	5.39667	5.26333	5.56	5.59	5.875	6.58	6.76333
213094_at	GPR126	G protein-coupled receptor 126	3.15333	3.57	3.05	3.1	3.115	3.09	3.41333	3.005	3.21333	3.41333	3.88	2.99	3.34	3.32667	3.32	3.42333	3.34667	3.34667	3.28333	3.52333	3.82	3.485	3.59	3.79667	3.25	2.81	3.21	3.24	3	3.5	2.91	3.60333	3.81	3.89	7.19333	7.26	3.92333	4.65333	3.29	5.26333	3.45667	3.77333	3.96	5.88	5.265	6.07667	4.13
221445_at	OR1A2	olfactory receptor, family 1, subfamily A, member 2	3.41333	3.61667	3.56667	3.58	3.845	3.78	3.58	3.4375	3.40333	3.52667	3.46333	3.51	3.555	3.70667	3.23333	3.46	3.55	3.41333	3.11	3.43	3.85	3.325	3.46667	3.56	3.43333	3.4	3.38333	3.20333	3.87	3.41333	3.43	3.19667	3.67667	3.32	3.34	3.28	3.46667	3.61333	3.69	3.43	3.54333	3.38667	3.68	3.23	3.32	3.63	3.51333
211491_at	ADRA1A	adrenergic, alpha-1A-, receptor	3.59	3.58333	4.02667	3.92	3.78	4.17	3.50667	3.78	3.91	3.97667	3.52333	3.52	3.565	3.64667	3.41333	3.42	3.36	3.73667	3.44667	3.62667	4.27	3.95	3.66667	3.44333	3.58	3.84	3.49333	3.43667	3.49	3.64667	3.77	3.54	3.63333	3.43667	3.26333	3.34	3.45333	3.62333	4.53	3.52333	3.92	3.52	3.7	3.67	3.68	3.63333	3.74333
1562412_at	GPR89A	G protein-coupled receptor 89A	3.37	3.38	3.75667	3.73	3.67	3.735	3.46667	3.515	4.01667	3.58667	3.49333	3.26	3.245	3.38667	3.25333	3.42667	3.43333	3.45667	3.38667	3.46	3.86	3.61	3.38667	3.33333	3.42	3.7	3.89	3.29	3.39	3.42333	3.55	3.29667	3.48	3.35333	3.32667	3.26	3.62	3.37	3.43	3.41333	3.43667	3.39333	3.27	3.2	3.65	3.39667	3.30333
213592_at	AGTRL1	angiotensin II receptor-like 1	6.16667	7.17333	6.48667	7.13	6.745	6.91	7.84667	5.965	6.95667	7.37667	8.68	6.97	6.635	7.34667	6.74667	6.30333	6.27333	7.47667	7.05333	7.53667	6.3	6.415	7.80667	8.41333	7.67667	6.92	6.86	6.52333	6.83	7.98	7.19	7.96	8.58667	9.86	6.08333	6.18	6.49333	7.69333	7.24	7.5	7.82	6.73333	7.78	6.01	6.46	7.51	7.38667
221395_at	TAS2R13	taste receptor, type 2, member 13	3.71333	3.82333	3.83	4.15	3.865	4.265	3.82	3.7575	3.78667	4.03	3.93667	3.94	4.195	4.04667	3.68667	3.85333	3.80667	3.87	3.85333	3.71667	3.58	3.905	3.78667	3.79333	3.88	3.99	3.93667	3.73333	4.19	3.74667	3.78	3.63667	3.84333	3.94	3.78333	3.85667	3.90333	3.99667	3.84	3.76333	3.99667	3.84667	4.15	4.17	3.74	3.96	3.98667
211616_s_at	HTR2A	5-hydroxytryptamine (serotonin) receptor 2A /// 5-hydroxytryptamine (serotonin) receptor 2A	4.13	5.33667	4.14	3.65	3.23	3.885	4.2	3.505	4.78667	4.59	3.31	7.67	7.48	6.46667	6.96333	7.23	6.67333	5.24333	4.06667	5.06333	4	4.22	4.06667	4.71333	4.44667	3.27	3.08667	6.99333	3.11	4.13333	4.05	4.04333	3.37333	3.84333	3.15	3.14333	3.67	3.60667	3.29	3.24	3.39667	6.39667	4.51	3.81	3.33	3.2	3.44667
205056_s_at	GPR162	G protein-coupled receptor 162	6.65667	7.47	6.65667	6.67	6.32	6.7	6.37	6.645	6.97333	6.72333	6.19	7.64	7.335	7.63	7.25667	8.12333	7.51	7.45333	6.87	7.5	7.35	6.5	6.45333	6.34333	7.14333	7.86	8.34	7.32667	7.22	6.84333	6.68	6.35667	6.14667	6.28333	5.54333	5.78667	5.5	5.87667	6.28	6.06667	6.38333	6.07	6.71	6.11	5.815	5.54667	5.87667
226063_at	VAV2	vav 2 oncogene	6.15667	6.51333	6.02333	6	5.775	5.775	6.28333	6.0125	6.57667	6.53	5.87333	5.95	5.865	6.00333	6.02667	6.03667	6.23333	6.12333	6.33333	6.12667	5.975	5.425	6.28333	6.16667	6.37333	5.75	5.34333	6.19	5.61	6.44667	5.75	6.13667	5.89	5.89333	7.02	6.4	5.97667	6.13	6.73	6.29	6.62333	6.56667	6.26	6.54	6.505	6.21333	6.11667
221306_at	GPR27	G protein-coupled receptor 27	6.26333	6.1	6.09	6.35	6.105	6.12	6.07	6.255	6.06667	6.18	6.21333	6.24	6.155	6.01333	5.92667	6.20333	5.98667	6.08	5.89333	6.1	5.805	6.11	6.06333	5.77667	5.95333	6.16	5.75333	6	6.25	6.08667	6.5	6.22	5.89667	6.12	5.62667	5.71667	5.73333	5.96	6.34	5.95667	5.95333	5.78	6.19	6.27	5.875	5.77	6.42333
207455_at	P2RY1	purinergic receptor P2Y, G-protein coupled, 1	4.16333	4.06	4.15333	3.55	3.605	3.93	3.69667	4.3875	3.63667	3.65667	3.57667	3.71	3.625	3.89667	3.97	3.79667	3.75667	3.98	3.52333	3.71333	3.91	3.7	3.69667	3.87333	4.00667	3.33	3.41	4.01667	3.79	3.63	3.56	3.92333	3.94333	3.90333	4.15667	4.40333	3.35333	3.42667	3.83	3.62333	3.72	3.48667	3.57	3.57	3.715	3.61	3.51667
208593_x_at	CRHR1	corticotropin releasing hormone receptor 1	5.44333	5.83667	5.55333	5.76	5.925	5.52	5.43333	5.435	5.74333	5.30667	5.6	5.64	5.89	5.66333	5.36667	5.62	5.76333	5.36333	5.48	5.65	5.725	6.215	5.39333	5.56333	5.36667	6.35	6.53667	5.42667	6.15	5.39333	5.64	5.41	5.3	5.41333	5.44333	5.32333	5.71667	5.74333	5.43	5.17	5.59667	5.46	5.84	5.65	5.64	5.22333	5.53667
216939_s_at	HTR4	5-hydroxytryptamine (serotonin) receptor 4	3.74	3.64667	3.65	3.93	3.62	3.91	3.79333	3.7275	3.84667	3.77	3.58333	3.7	3.675	3.55333	3.50667	3.47	3.62667	3.8	3.48333	3.79	3.87	3.88	3.67667	3.67333	3.69333	3.67	3.55	3.47	3.95	3.61333	3.67	3.56	3.72667	3.54333	3.46	3.32333	3.52	3.79667	4.47	3.77	4.11667	3.62333	3.72	3.72	3.6	3.67667	3.77667
206637_at	P2RY14	purinergic receptor P2Y, G-protein coupled, 14	4.35	4.37667	4.17667	4.36	4.52	3.825	4.46	4.3075	4.22333	4.58333	4.23333	4.24	4.17	4.06667	4.01667	4.10667	4.17	4.44667	4.05333	4.53333	4.535	4.26	4.56333	4.1	4.28333	3.82	3.65333	4.39	3.46	4.14333	4.21	4.36667	3.95333	3.72667	7.17	5.58	3.90667	4.87	4.55	4.63667	5.07	4.33	4.18	4.31	5.655	5.39667	5.91
239031_at	SSTR2	somatostatin receptor 2	6.17333	6.18667	5.84667	5.66	5.465	5.665	5.65667	5.7975	5.39333	5.19333	5.53	5.74	6.37	5.95	5.73667	5.99333	6.17667	6.16	5.48333	5.25667	5.54	5.725	5.42333	5.56667	5.53333	6.33	6.74333	6.05333	6.8	5.68333	5.85	5.39333	5.63667	5.56333	5.46667	5.82	5.54667	5.79667	5.42	5.33333	5.57	5.65	5.58	5.6	5.355	5.53333	5.57667
1552715_a_at	RXFP1	relaxin/insulin-like family peptide receptor 1	3.25333	3.19333	3.04	2.99	3.01	3.195	3.05	3.105	2.93667	2.95	3.01667	5.56	5.965	3.47333	4.11667	4.68667	4.25333	3.01	2.86667	3.05667	3.145	3.105	3.04	3.06	2.94333	3.12	2.99667	4.45333	2.97	3.01333	2.99	2.94333	3.02333	3.04667	2.96667	3.01333	3.06667	3.18667	3.32	3.03	3.30333	3.11667	3.8	3.04	2.935	3.13	3.23
235885_at	P2RY12	purinergic receptor P2Y, G-protein coupled, 12	6.24333	7.32	4.99333	5	5.04	6.095	8.45	6.04	5.48667	6.31333	9.03	4.75	5.91	6.71333	6.96667	6.69333	7.13	7.39333	7.31333	7.13	4.905	5.32	8.38667	8.10667	7.87	2.96	4.66667	7.30333	2.87	8.28	5.57	8.78333	7.99	8.49	6.60333	6.81667	2.65667	3.12333	2.8	2.82333	2.71333	2.83667	2.61	2.75	2.78	3.01	3.88667
208304_at	CCR3	chemokine (C-C motif) receptor 3	3.93333	4.45667	4.34333	4.36	4.615	4.04	4.37	4.1975	3.97	4.37	4.07	3.89	4.285	4.16333	3.96333	3.98	4.31667	4.25	4.18667	4.18333	4.41	4.615	4.06333	4.27667	4.08333	4.19	4.25667	4.04333	4.5	4.10333	4.27	4.1	4.54667	4.07667	4.10333	4.10333	4.26333	4.38333	4.24	4.34	4.55333	4.21667	4.97	4.66	3.975	4.41	4.41667
207553_at	OPRK1	opioid receptor, kappa 1	5.34667	5.67667	5.39667	4.95	5.005	4.825	4.84333	5.585	4.94667	4.98667	4.74333	4.98	5.27	4.96667	4.86	4.83	5.08	4.87333	5.19333	5.56	5.52	5.35	4.90667	4.94333	4.93667	5.19	4.84667	5.06667	4.89	5.14333	5.27	4.69	4.76	4.80333	5.27333	4.81333	4.87	5.02333	4.9	4.60333	4.85	4.72667	5	4.74	4.72	4.84	4.9
208486_at	DRD5	dopamine receptor D5	5.07333	5.07	4.88	4.5	5.17	4.985	4.88667	4.8225	4.99333	4.86333	4.7	4.8	5.31	4.65333	4.72333	4.92	5.04667	4.99667	4.85333	4.90333	4.995	5.125	4.89667	4.93667	4.88	4.61	4.59667	4.8	4.67	4.94667	5.25	4.57667	4.60667	4.94	4.77333	4.49	4.68667	4.99333	5.21	4.83	5.24	4.66333	5.37	4.69	4.355	4.68	4.93667
217455_s_at	SSTR2	somatostatin receptor 2	5.26	5.72333	5.35	5.11	5.005	5.19	4.82667	5.2025	5.02333	4.82667	4.83667	5.94	6.16	5.63	5.23667	5.72667	5.73333	5.78667	4.77667	4.85333	5.15	5.065	4.69333	4.93667	5.2	5.88	6.07	5.74	6.19	5.29667	5	4.65	4.75333	5.02667	4.78333	5.54667	4.96667	5.00333	4.83	4.61	4.83333	5.02333	5.1	5.01	4.73	4.85667	5.04333
220816_at	EDG7	endothelial differentiation, lysophosphatidic acid G-protein-coupled receptor, 7	4.87667	4.93667	5.14333	4.99	5.32	5.68	4.77667	5.03	5.01667	5.18667	4.69667	5.39	5.265	4.90333	4.65667	4.79333	5.02333	4.99	4.59	4.80667	5.22	5.205	4.61333	4.89	4.85667	4.91	4.73667	4.73333	5.31	4.93667	4.94	4.79333	5.06667	4.76667	5.53333	5.14333	5.15	4.94333	5.91	5.38333	5.19333	4.95667	5.69	4.97	5.235	4.77667	5.10333
216992_s_at	GRM8	glutamate receptor, metabotropic 8	4.55667	4.57	4.48667	4.16	4.23	4.37	4.36	4.4525	4.5	4.45667	4.11667	4.27	4.42	4.12	4.04	4.54667	4.71	4.23	4.27667	4.2	4.46	4.225	4.63333	4.02667	5.09667	4.5	4.03	4.36333	3.98	4.59333	5.24	4.08333	4.12333	4.16333	4.08333	4.06667	3.94667	4.07333	4.89	4.39667	4.5	3.92667	4.33	4.06	4.075	4.04333	3.94667
1554818_s_at	C20orf12	chromosome 20 open reading frame 12	4.96333	5.10333	4.62	4.87	4.76	4.525	4.80333	4.865	4.40667	4.65333	4.74	5.06	4.915	4.88667	4.76667	4.53667	4.84667	4.83667	4.76667	4.98333	4.745	4.49	4.71333	4.82	4.93667	5	4.99	4.77333	5.12	4.77	4.61	4.67333	4.91	4.71	4.84333	4.68667	4.84	5.03667	4.62	4.76	4.85333	4.95333	4.96	4.85	4.845	4.82333	4.79667
231805_at	PRLHR	prolactin releasing hormone receptor	3.94	3.85	3.92333	3.83	4.265	4.425	4.18333	3.895	4.31333	4.35	3.98333	3.83	4.03	3.80333	3.69667	3.84333	3.85	3.94333	3.78667	3.97333	3.95	3.94	3.89667	3.98	3.95	3.97	3.76	3.65	3.61	3.64667	3.87	3.98	3.88667	3.81667	3.67333	3.65333	3.85	3.96333	4.14	3.75333	4.04667	3.83333	4.08	3.84	3.65	3.77	3.95
1553316_at	GPR82	G protein-coupled receptor 82	3.26	3.25667	3.41333	3.57	4.095	3.635	3.37	3.2125	3.39333	3.64	3.41	3.29	3.51	3.31667	3.15667	3.46667	3.34667	3.25667	3.20667	3.35	3.655	4.005	3.15333	3.36333	3.17	3.45	3.14333	3.14667	3.36	3.33	3.34	3.28667	3.24	3.26	3.34667	3.29667	3.52	3.51	3.19	3.17333	3.40333	3.38667	3.46	3.02	3.33	3.43333	3.46333
241802_x_at	GRM2	glutamate receptor, metabotropic 2	6.07333	6.77333	6.13	6.14	6.305	5.95	5.96667	6.1825	6.1	6.13	5.75	6.51	6.605	6.72	6.46667	6.89333	6.85	6.70333	6.11	6.64667	6.235	6.3	6.17333	6.00667	6.47333	6.46	6.37667	6.56667	6.6	6.26333	6.6	5.87667	6.12333	5.96	5.74333	5.77667	6.08667	6.00333	5.88	5.85667	6.16	6.19333	6.5	6.17	5.765	5.83333	5.97
203705_s_at	FZD7	frizzled homolog 7 (Drosophila)	5.19333	4.57	4.63	4.38	4.105	4.235	4.47	4.405	3.89333	4.08333	4.54333	4.09	4.33	4.18333	4.07	4.19667	4.34333	5.35333	4.22667	4.45	4.345	4.22	4.31333	4.61333	4.38333	7.86	7.72333	3.93	7.39	4.87	5.33	4.35333	4.83	5.03667	7.20667	7.09	6.41667	5.41	6.39	6.40667	5.70667	6.54	4.67	6.71	6.255	6.88333	5.29667
208048_at	TACR1	tachykinin receptor 1	3.75667	3.67	3.88	3.81	4.165	4	3.53667	3.6025	3.93333	3.87667	3.51	3.56	3.645	3.69333	3.43333	3.66	3.42	3.46333	3.51667	3.53667	4.115	4.31	3.54667	3.40667	3.44333	3.71	3.55333	3.31667	3.66	3.36333	3.71	3.65667	3.64	3.4	3.35333	3.48333	3.63333	3.82333	3.57	3.54333	3.74667	3.63333	4.36	3.93	3.605	3.72	3.99
227405_s_at	FZD8	frizzled homolog 8 (Drosophila)	6.81667	7.53333	6.21333	6.71	6.46	6.2	5.92667	6.42	5.90667	5.94667	5.97	7.17	6.055	6.89667	6.63667	6.55667	6.64667	7.12333	6.44667	7.35333	6.93	6.305	6.25667	6.16333	6.06	6.15	5.61667	6.73	6.19	6.31333	5.84	6.14333	6.44333	6.05333	8.16	8.35667	7.51667	6.58333	7.33	7.69	7.21333	7.64333	7.18	7.87	6.695	7.56667	6.36
206974_at	CXCR6	chemokine (C-X-C motif) receptor 6	4.47	4.36	4.34667	4.27	4.145	4.195	4.30667	4.51	4.63333	4.24667	4.38	4.21	4.255	4.44	4.04667	4.17	4.20667	4.21667	4.10667	4.27333	4.27	4.035	4.29	4.12	4.14333	4.73	4.1	4.21667	4.91	4.34333	4.44	4.20333	4.37	4.01	3.95333	4.29	4.40667	4.42667	4.75	4.35333	4.31333	4.42333	5	4.39	4.525	4.31333	4.62667
234650_at	LGR4	Leucine-rich repeat-containing G protein-coupled receptor 4	2.51667	2.53333	2.59333	2.68	2.675	2.73	2.47667	2.6425	2.71333	2.95667	2.71333	2.54	2.48	2.60667	2.74	2.65333	2.57333	2.68667	2.86333	2.74333	2.43	2.61	2.79667	2.85667	2.69667	3.01	3.18333	2.72	2.8	2.84333	2.46	2.96667	2.89	2.88667	3.32667	3.09	3.03333	3.05	2.48	2.89	2.8	2.52	2.46	2.69	3.28	2.91667	2.64333
223423_at	GPR160	G protein-coupled receptor 160	3.92333	3.95667	3.48667	3.54	3.45	3.535	3.93667	3.8125	3.51333	3.40333	4.68333	3.69	3.99	3.77667	3.58	3.74333	3.98667	3.74	3.48667	3.54667	2.94	3.73	3.80333	4.07	3.88667	3.56	3.83	3.65	3.54	3.70667	3.72	4.24333	4.04333	4.14667	4.03	4.07333	3.73667	3.68333	3.97	3.68	3.78667	3.91333	3.93	4.22	4.94	5.01667	5.44
236264_at	LPHN3	latrophilin 3	6.17667	6.11	5.52	4.79	4.82	4.82	5.12667	5.8575	5.47667	4.79667	4.26	7.05	5.905	5.35	5.97667	6.39667	6.62	5.46667	5.05	5.43667	5.25	5.275	5.15667	4.88333	5.85333	5.52	5.90667	6.2	5.46	5.43667	5.4	4.93667	3.98333	4.99667	5.73333	5.53667	4.85333	4.49667	4.23	3.92333	4.08	7.07333	4.71	3.93	4.72	4.24667	3.98
206795_at	F2RL2	coagulation factor II (thrombin) receptor-like 2	3.2	3.33667	3.37	3.45	3.315	3.17	3.33667	3.205	3.03667	3.20667	3.23333	3.01	3.015	3.40333	2.99667	3.15	3.30667	3.28	3.12667	3.4	3.29	3.41	3.27	3.32	3.19667	3.86	3.31667	2.99	3.46	3.16667	3.17	3.08667	3.37	3.28667	3.27333	3.37	3.09333	3.48	3.29	3.27333	3.37	3.15667	3.27	3.44	3.15	3.31	3.12
206978_at	CCR2	chemokine (C-C motif) receptor 2 /// chemokine (C-C motif) receptor 2	3.78	3.67667	3.86667	3.99	3.735	4.005	3.96333	3.5675	3.69	3.98333	4.17	4.13	4.09	3.69667	3.64333	3.53667	3.98	3.63333	3.77667	3.82667	3.725	3.895	3.73	4.11667	3.6	4.32	3.73	3.57	4.17	3.69333	3.66	3.96667	4.28	4.01667	4.64667	4.77333	4.44	4.43333	3.89	4.22	4.28667	4.66667	4.18	4.29	5.1	4.49	4.89667
218665_at	FZD4	frizzled homolog 4 (Drosophila)	6.11333	6.04333	5.99333	6.18	6.335	6.19	6.25333	6.2725	5.82	6.18667	6.33333	6.32	6.18	6.33667	6.21	6.19667	6.17333	6.03	6.04	6.16333	6.125	6.24	6.00333	6.21667	6.14	5.96	5.70333	6.06667	6.38	6.01333	6.01	6.25	5.98333	6.08667	6.64333	6.55667	8.13333	8.24667	7.49	7.71333	7.84667	7.77333	7.17	8.41	8.44	9.26667	9.45333
1559633_a_at	CHRM3	cholinergic receptor, muscarinic 3	3.65667	3.60667	3.77667	3.21	3.235	3.41	3.15667	3.5	3.52333	3.49	3.21667	5.15	5.515	3.63	4.59667	4.49667	4.25667	3.34667	3.71333	3.25667	3.775	4.205	3.16333	3.21333	3.40333	2.92	3.22	4.35	3.05	3.14667	4.22	3.24333	3.17	3.25	3.16333	3.12	3.29667	3.59	3.11	3.2	3.08667	3.14	3.44	3.12	3.12	3.17667	3.22333
1555655_at	OR10A4	olfactory receptor, family 10, subfamily A, member 4	3.92667	4.04	4.35667	4.03	4.315	4.31	3.96667	4.0625	4.18333	4.23	4.26667	4.15	4.18	4.1	3.87667	4.01667	4.05667	3.83	3.87	3.91667	4.125	4.305	3.88	4.17667	3.82333	4.16	4.21333	3.80667	4.36	3.98667	4.03	3.94667	3.97667	4.18333	3.95333	3.97	4.53	4.49333	4.1	3.85	4.04333	4.08	4.96	4.06	4.18	4.48333	4.50333
220481_at	GPR75	G protein-coupled receptor 75	5.00667	5.33	5.29667	5.02	5.285	5.5	5.29	5.325	5.05	5.38667	5.33	4.9	4.795	5.11667	4.8	4.82	5.30333	5.14	4.99333	5.02	4.765	5.335	5.09	5.28333	5.04667	4.97	4.76333	4.62333	4.76	4.87667	5.26	4.85667	5.15333	5.03	4.76	4.73333	4.75	5.10667	4.82	4.95333	5.12667	4.82333	4.84	5.02	4.525	4.93333	4.79667
216924_s_at	DRD2	dopamine receptor D2	6.47667	5.91	7.05667	6.03	6.355	6.045	5.91	6.92	6.65	6.77333	6.03	6.09	5.595	5.98667	5.59667	5.64333	5.57667	5.91667	5.87333	5.98333	6.225	5.995	5.91	5.93667	5.74	6.41	5.86667	5.64667	6.28	5.91667	6.32	5.75667	5.82667	5.67667	5.59333	5.69333	5.87667	6.07667	6.13	5.65667	6.03333	5.81333	6.26	5.85	5.62	5.57	5.80667
211249_at	GPR68	G protein-coupled receptor 68	3.63667	3.43667	3.99	3.52	4.425	3.845	3.21333	3.625	3.87667	4.08667	3.49333	3.82	3.56	3.48333	3.29	3.56	3.33	3.44667	3.27333	3.38667	4.51	4.12	3.36667	3.35667	3.29	3.66	3.33333	3.08667	3.77	3.43	3.72	3.41	3.25667	3.32333	3.11333	3.26333	3.99	3.88333	4.1	3.46333	3.53667	3.54667	3.86	3.51	3.63	3.33	4.19
208105_at	GIPR	gastric inhibitory polypeptide receptor	4.29	4.27	4.77	4.7	4.565	4.715	4.11667	4.5625	4.54	4.56	4.18667	4.38	4.1	4.28	3.99	4	4.06	4.26333	4.01667	4.29333	4.74	4.85	4.17333	4.03333	4.19	4.19	3.98333	3.92	4.41	4.19667	4.47	4.19333	4.16667	3.97667	3.78	3.94667	4.1	4.29667	4.48	4.08667	4.66	4.37	5.01	4.5	4.31	4.04333	4.47667
204966_at	BAI2	brain-specific angiogenesis inhibitor 2	7.63667	7.32333	7.41333	5.62	6.18	5.995	5.72	7.415	6.19667	5.98667	5.22333	6.95	6.705	7.05667	6.73	7.55333	7.08667	7.37667	5.80667	5.86667	6.07	5.405	5.73333	5.59667	6.12	5.84	5.76667	6.88	5.52	6	5.94	5.13333	5.78667	5.4	4.69667	4.39	4.48667	4.67667	5.06	4.91	4.71	4.18667	5.14	4.39	4.395	4.59667	4.53
206171_at	ADORA3	adenosine A3 receptor	6.20667	6.54333	5.54667	6.32	5.97	6.065	6.95333	6.195	5.87333	6.14667	7.19667	5.75	6.075	6.55	5.89667	5.85333	6.28667	6.71667	6.23667	6.52333	5.64	5.665	6.84	7.24	6.96667	6.02	5.98333	5.92333	5.7	6.63667	6.39	7.05	7.04333	6.85	6.69	6.50333	5.96667	6.12667	5.7	5.84333	6.08	5.95667	5.64	6.45	5.87	5.88333	5.95667
206772_at	PTHR2	parathyroid hormone receptor 2	3.59	4.68333	3.38333	3.27	3.34	3.505	3.53333	3.4025	3.3	3.4	3.35	5.27	4.66	4.33667	4.39667	4.69	4.4	3.92	3.59333	3.67	3.555	4.425	3.46333	3.62667	3.48	3.38	3.55	4.31333	3.53	3.56667	3.28	3.33667	3.57667	3.68333	3.62667	3.71	3.37333	3.67	3.61	3.49667	3.23333	3.56667	3.5	3.43	3.56	3.53	3.30333
214503_x_at	GPR135	G protein-coupled receptor 135	3.21	3.05333	3.36333	3.56	3.295	3.185	2.87333	3.325	3.11	3.49	3.08333	3.25	3.255	3.3	3.07333	3.14667	2.96667	3.10667	3.23	3.12667	3.36	2.975	3.09333	3.19333	3.10333	3.07	3.11333	3.03	3.23	3.17333	3.25	3.06667	3.25667	2.96333	3.08	3.24667	3.37	3.53	3.32	3.30667	3.29	3.18667	3.51	3.21	3.17	3.50667	3.54333
238390_at	GPR39	G protein-coupled receptor 39	3.76333	3.79333	3.66667	3.41	3.825	3.525	3.86	3.76	3.50333	3.56333	3.91333	3.27	3.515	3.91333	3.55333	3.58	3.67667	3.7	3.80667	3.78667	3.42	3.755	3.75333	4	3.59667	3.91	3.85333	3.56667	3.74	3.78667	3.62	3.75667	4.09	4	3.72333	3.71667	3.8	4.01667	3.51	3.47	3.55333	3.66667	3.8	3.9	3.795	3.87333	3.6
211979_at	GPR107	G protein-coupled receptor 107	7.94333	7.92667	7.62667	8.12	7.895	7.925	7.8	7.8	7.81667	7.95667	7.91	7.66	7.495	7.84	7.96667	7.76333	7.57	7.98	8.49333	8.00333	7.98	7.905	8.04333	7.85667	8.02667	7.99	7.91	8.16667	8.11	8.16	7.99	8.16333	8.16333	7.80667	8.36667	8.21667	8.04	7.39	6.82	7.45333	6.87667	8.06667	7.29	7.8	7.715	7.39	7.31
241526_at	PROKR1	Prokineticin receptor 1	4.82667	4.98333	4.82333	4.98	4.895	4.57	4.77333	4.8925	4.55333	4.73667	4.72333	4.96	4.885	4.94	4.36667	4.59667	4.79333	4.89333	4.43667	4.82333	4.565	5.06	4.83333	4.65667	4.8	4.74	4.70667	4.51667	5.37	4.67333	4.65	4.56	4.74	4.57667	4.30333	4.53	4.42667	4.66	5.5	4.82	5.17333	4.74333	5.41	5.05	4.775	4.66333	4.74333
1555533_at	GPR103	G protein-coupled receptor 103	3.36	3.58667	3.03667	3.54	3.145	3.085	3.52	3.45	3.12667	3.2	3.45667	3.28	3.34	3.45	3.07	3.23333	3.46	3.52333	3.11333	3.50667	3.25	3.135	3.46667	3.29333	3.59333	3.65	3.31333	3.15	3.58	3.43333	3.43	3.22	3.41667	3.20667	3.32333	3.22667	3.15333	3.25667	3.44	3.34667	3.59333	3.48667	3.57	3.46	3.35	3.35	3.29333
207062_at	IAPP	islet amyloid polypeptide	3.73667	3.82	3.72	3.92	3.895	3.865	4.01	3.76	3.75	3.89667	3.98333	3.69	4.025	3.75667	3.78333	3.73	3.81	3.90333	3.68	3.93333	3.99	3.975	3.79	4.03667	3.79333	3.7	3.74333	3.79	3.96	3.91333	3.52	3.71333	3.88	3.61667	3.82333	3.84333	3.79333	4.00333	3.82	3.78333	3.88333	3.82	4.09	3.75	3.81	4.04	3.86
219032_x_at	OPN3	opsin 3 (encephalopsin, panopsin)	6.40333	5.95	5.84333	5.57	5.68	5.61	6.35	5.98	5.77333	6.39333	5.76	9.01	8.15	7.30333	7.79	8.58667	7.43667	5.76333	6.19667	8.33333	8.535	6.5	5.62	5.68333	5.69	4.78	5.02	7.78667	5.19	5.67	5.95	6.12667	5.66667	5.51667	6.54667	6.41667	4.98667	5.84333	5.63	5.82	5.54333	5.14	5.07	6.15	6.675	5.90667	5.69333
229971_at	GPR114	G protein-coupled receptor 114	4.12667	4.25	4.09	4.12	4.055	4.205	3.84333	4.205	3.99	4.04667	3.79333	3.7	3.95	4.05667	3.82	3.79667	3.87333	3.89333	3.83333	3.91	3.995	4.13	3.94	3.81667	3.76	4.08	3.99667	3.8	4.26	3.83	3.96	3.84333	3.9	3.78333	3.85	3.94	4.12333	4.12	4.26	4.00333	4.14	3.92	4.51	3.98	4.09	3.92333	3.92
231166_at	GPR155	G protein-coupled receptor 155	7.78667	6.16333	7.82333	5.34	6.46	5.955	5.21667	7.4475	5.96667	5.50667	4.95	6.92	6.785	6.15333	6.72333	7.30333	6.85333	6.45	6.25	5.93333	6.225	5.94	5.59	4.98	6.00333	6.05	6.28667	6.84333	5.56	6.00333	6.14	5.61333	4.93	6.03	8.43	8.83333	5.28667	4.61	5.15	5.34667	4.62333	5.48	4.55	3.82	4.425	4.19	4.23333
227970_at	GPR157	G protein-coupled receptor 157	5.78	5.71333	5.48333	5.7	5.425	5.275	5.60667	5.5625	5.49333	5.25	5.63333	5.46	5.685	5.52333	5.42667	5.43333	5.49	5.52667	5.34	5.54333	5.65	5.9	5.47667	5.24667	5.41333	5.51	5.68333	5.43	5.97	5.55	5.39	5.63	5.47333	5.41667	6.06	6.10667	6.15	6.22667	6.88	6.68333	7.14	5.76667	6.32	6.36	7.245	6.20333	6.58667
226615_at	XPR1	Xenotropic and polytropic retrovirus receptor	6.3	6.36333	6.31667	5.48	6.2	6.245	6.75333	6.265	7.7	7.13333	4.95667	7.12	6.54	6.33333	6.70667	7.11	6.64	6.05	6.36667	7.74	7.845	7.53	6.46	6.31333	7.19333	5.9	6.45667	6.7	5.88	6.68333	6.36	5.70667	5.33	6.15667	5.68667	5.48667	5.59667	5.14667	7.32	6.61333	7.37667	5.05333	5.08	3.79	4.405	4.68667	4.22
209201_x_at	CXCR4	chemokine (C-X-C motif) receptor 4	5.87	5.65	5.60667	6.1	6.19	5.82	6.16667	5.51	5.32	5.48	7.05667	5.5	5.86	5.53667	5.70667	5.48333	5.58667	5.40333	5.59667	5.77333	5.7	5.485	6.18333	6.55333	5.9	5.47	5.83667	5.42333	5.39	5.88333	5.68	6.42667	6.66	6.91	7.40333	7.13667	6.92	6.75	6.29	6.87333	6.26333	6.11667	7.25	8.27	8.25	8.21667	7.90333
1566256_s_at	GPR180	G protein-coupled receptor 180	2.94	2.72333	2.77333	2.82	2.92	2.82	2.69	2.8275	2.97667	2.67667	2.74333	3.07	2.765	2.61667	2.75667	2.8	2.77333	2.70667	2.68667	2.81667	2.785	2.705	2.80333	2.59667	2.75333	2.76	2.86667	2.78667	2.79	2.83667	2.73	2.74333	2.93	2.70667	2.67333	2.75333	2.65	2.82667	2.68	2.58667	2.82	2.77333	2.74	2.75	2.675	2.71667	2.84667
214104_at	GPR161	G protein-coupled receptor 161	5.10333	5.58333	5.55	5.07	5.715	5.665	6.61667	5.3675	7.54	7.76	5.47667	5.87	5.805	5.85667	6.68667	6.21333	5.39333	5.98667	6.24	6.58333	6.825	5.92	5.87667	6.47667	5.71667	5.58	5.58	6.11333	5.42	5.95667	5.65	6.15667	5.96667	5.92333	7.68667	6.84667	6.71	6.83	4.96	6	5.70667	6.98333	5.54	6.17	5.82	6.24333	5.34667
234165_at	PTGDR	prostaglandin D2 receptor (DP)	3.56	3.57333	3.69333	3.51	3.85	3.68	3.78	3.635	3.66333	3.78667	3.64333	3.53	3.665	3.58333	3.54667	3.39	3.64667	3.59667	3.37333	3.53667	3.86	3.91	3.72333	3.66333	3.67	3.54	3.50667	3.54	3.56	3.62	3.63	3.47	3.66667	3.74	4.08	4.83667	3.53333	3.74333	3.81	3.86333	4.01667	3.74	3.7	3.72	3.695	3.66667	3.71
1555715_a_at	HRH3	histamine receptor H3	5.68667	5.26333	5.98667	5.1	6.025	5.86	5.39333	5.7725	5.66	5.79667	5.44	5.28	5.9	5.32667	5.31667	5.62333	5.35333	5.30667	5.62333	5.09667	6.3	5.93	4.99667	5.41667	5.05667	5.3	5.36667	5.15	5.44	5.3	5.5	5.40333	5.18333	5.53333	5.30333	5.21	5.72	5.92667	5.4	5.34	5.47333	5.40333	5.9	5.47	5.23	5.60667	6.18
205013_s_at	ADORA2A	adenosine A2a receptor	9.47333	5.04	9.12667	5.05	7.365	6.63	5.06333	10.0625	5.37333	5.36667	5.07667	4.99	5.065	5.16333	5.26	5.17667	5.09	5.13333	5.28667	5.4	5.24	5.775	4.96	5.18333	4.96	5.3	5.24333	4.92	5.26	4.94667	4.94	5.24667	4.89333	4.93	5.00667	5.32	5.17667	5.78667	5.34	5.46667	5.45333	4.99667	5.44	4.95	5.195	5.12333	5.24333
207929_at	GRPR	gastrin-releasing peptide receptor	6.57	6.62667	6.62333	6.47	6.505	6.505	6.70333	6.5825	6.37667	6.61667	6.38667	6.42	6.71	6.43333	6.24667	6.52	6.63	6.31	6.41	6.59	6.62	6.67	6.36	6.71333	6.43333	6.69	6.14667	6.20667	6.7	6.22333	6.4	6.43667	6.35333	6.69333	6.27667	6.08333	6.14667	6.64	7.07	6.78333	7.10667	6.10667	7.18	6.26	6.095	6.58333	6.66333
203632_s_at	GPRC5B	G protein-coupled receptor, family C, group 5, member B	10.9333	10.2567	10.8833	12.35	11.53	11.77	11.6367	10.7575	10.9767	11.3	11.88	10.8	11.175	10.86	11.4967	10.79	10.4467	11.1633	12.0467	11.19	10.725	10.785	11.61	11.8233	11.1633	9.46	10.1433	11.4733	9.97	11.25	11.04	12.0167	12.1967	11.5467	7.78333	8.67333	6.69	7.40333	8.29	8.1	8.16667	6.99	7.15	7.41	6.645	7.95	7.33333
1553036_at	GPR111	G protein-coupled receptor 111	3.10333	3.22	3.4	3.46	3.645	3.515	3.37	3.3625	3.13667	3.33667	3.39667	3.32	3.36	3.37333	3.17333	3.35667	3.15333	3.16667	3.41333	3.36	3.16	3.67	3.16667	3.43333	3.15333	3.3	3.30667	3.06	3.21	3.01	3.37	3.24667	3.27333	3.1	3.15667	3.31333	3.18667	3.50667	3.14	3.15	3.35333	3.13	3.4	3.23	3.215	3.24667	3.2
1553723_at	GPR97	G protein-coupled receptor 97	3.93333	3.79	3.68333	3.71	3.805	3.585	3.86	4.1775	3.61333	3.67667	4.21333	4.01	4.185	3.98333	3.83667	3.91333	4.01667	3.84333	3.91333	3.73333	3.515	3.695	3.71	4.15	3.84333	4.18	3.94	3.63667	4.17	3.9	3.89	3.8	3.99333	3.93333	3.88333	3.85667	4.10667	4.15333	4.03	3.85333	3.75333	3.93667	4.04	4.29	3.82	4.23333	4.18
1559432_at	CCBP2	Chemokine binding protein 2	4.16	4.51667	4.38667	4.39	4.64	4.355	4.42667	4.285	4.32	4.71333	4.22	4.23	4.27	4.4	4.08333	4.13333	4.46	4.28667	4.24	4.2	4.315	4.445	4.20333	4.45333	4.11667	4.64	4.07333	3.93333	4.59	4.37667	4.34	4.08	4.11667	4.4	4.25	4.40333	4.44	4.78333	4.75	4.26667	4.67333	4.22667	4.68	4.28	4.02	4.40667	4.58667
230640_at	PRPF40B	PRP40 pre-mRNA processing factor 40 homolog B (S. cerevisiae)	5.14333	5.38333	5.33667	5.45	5.3	5.535	5.46667	5.2075	5.25667	5.18	6.00667	5.13	5.03	5.62667	5.23333	5.22333	5.25	5.53	5.76333	5.38	5.275	5.07	5.77667	5.66	5.45667	5.65	5.43333	5.26333	5.05	5.87667	5.21	6.03667	5.75333	5.52667	5.60667	5.70667	5.34333	5.63	4.96	5.39	5.57667	6.22667	5.38	5.38	5.22	5.79333	5.56333
1567069_at	OR4D1	olfactory receptor, family 4, subfamily D, member 1	6.13667	5.96	5.51667	5.84	5.46	5.435	6.28667	6.0225	5.62	5.56333	6.18333	5.66	5.76	5.81333	5.65333	5.54	6.07333	5.92333	5.65333	6.07	5.83	5.67	5.99	5.68333	5.87333	5.84	5.97	5.75667	5.8	5.73333	6.1	5.83333	5.96667	5.92	5.84	5.73333	6.01667	6.04333	6.49	5.90667	5.92667	5.96	6.34	5.66	5.665	5.83	5.89333
1553561_at	TAS2R50	taste receptor, type 2, member 50	3.02667	3.36	3.17667	3.01	3.105	3.35	3.13333	3.055	2.82333	3.17	3.07667	2.85	2.96	3.25333	2.97	2.93667	3.33333	3.18	2.92667	3.26333	3.045	3.28	3.22333	3.18333	3.17333	3.24	3.22667	3.05	3.52	3.11333	3.1	2.99667	3.30667	3.29667	3.07667	2.89	3.03667	3.19	3.05	3.2	3.09667	3.07	3.81	2.9	2.885	3.08333	3.21
207818_s_at	HTR7	5-hydroxytryptamine (serotonin) receptor 7 (adenylate cyclase-coupled)	3.78667	3.56333	3.41333	3.48	3.52	3.61	3.51333	3.52	3.47	3.67333	3.31	3.51	3.505	3.62667	3.33	3.41667	3.51333	3.61333	3.40333	3.62333	3.475	3.57	3.48333	3.56667	3.49667	3.82	3.37667	3.36667	3.63	3.37	3.46	3.35667	3.68667	3.37	3.41667	3.34	3.67	3.47	3.76	3.54333	3.75	3.54667	3.93	3.57	3.34	3.58333	3.52667
1553817_at	DKFZP434P211 /// LOC646074	POM121-like protein /// similar to nuclear pore membrane protein 121	2.96333	3.04333	3.17667	2.99	3.085	3.095	2.86	2.9875	3.20667	3.23667	2.96667	3.07	3.105	2.89667	2.87	3	2.87333	3.02	3.02	2.94	3.32	3.165	2.88	2.87333	2.89	3.21	2.91	2.89	3.31	2.97667	3.15	2.99667	2.85667	2.91667	2.82	3.01	3.17	3.08	3.03	2.96667	3.02667	3.10333	3.13	3.22	3.02	3.08333	3.05
235762_at	TAS2R14	taste receptor, type 2, member 14	4.61667	4.47333	4.42	4.57	4.28	5.595	5.03333	4.605	4.32333	4.57667	5.66667	4.06	4.645	4.65667	5.29	4.69667	4.51333	4.79	4.89	4.46667	4.16	4.385	5.03	5.06667	4.46667	5.2	5.38	4.98333	5.75	4.87	4.64	5.16667	5.61333	5.22667	4.4	4.59	4.48	4.30667	3.91	4.36667	4.32333	4.25667	3.92	4.15	4.43	4.63333	4.13667
208098_at	OR5V1 /// OR12D3	olfactory receptor, family 5, subfamily V, member 1 /// olfactory receptor, family 5, subfamily V, member 1 /// olfactory receptor, family 12, subfamily D, member 3 /// olfactory receptor, family 12, subfamily D, member 3	3.54333	3.68	3.53333	3.33	3.58	3.485	4.05	3.925	3.15667	3.29	3.67667	3.43	3.46	3.73667	3.26	3.39333	4.10333	3.93333	3.32667	3.86	3.575	3.345	3.66667	3.8	3.79333	3.55	3.53	3.38333	4.1	3.5	3.61	3.46	3.40333	3.58333	3.43667	3.44667	3.23	3.38	4.13	3.72333	4.14333	3.37333	3.36	3.5	3.365	3.58	3.57667
1567058_at	OR8G2	olfactory receptor, family 8, subfamily G, member 2	4.27667	4.26667	3.85667	4.03	3.975	3.64	4.25667	4.095	3.74667	3.69667	4.06	3.89	3.935	4.04	3.78	3.98667	4.29	4.40667	3.60667	4.32667	4.135	3.94	4.18	4.08	4.28	4.16	4.47	3.72667	4.14	4	4.08	3.91	4.37667	4.04	3.95	3.85667	3.81	3.93	4.25	3.89667	4.03	4.13333	4.3	4.45	4.01	3.95667	3.93667
227846_at	GPR176	G protein-coupled receptor 176	7.38333	7.53	7.68333	6.84	6.66	6.955	7.04333	7.0975	7.96667	7.34667	6.48667	7.69	7.635	7.64667	7.38	7.69	7.70667	7.20667	7.43333	7.12667	6.3	7.025	7.44333	7.25333	7.95333	8.08	8.02333	7.68	8.09	7.65667	7.96	6.63667	6.64	7.11	6.86667	6.78667	8.91333	7.59667	6.09	6.30333	6.07667	8.53667	6.82	7.07	7.265	7.46667	7.46333
231291_at	GIPR	Gastric inhibitory polypeptide receptor	5.66	5.64667	5.61	5.8	5.975	5.86	5.73333	5.845	5.81	5.97	5.85	5.73	5.72	5.65333	5.66667	5.79667	5.65	5.86333	6.03333	5.68667	5.87	6.195	5.70333	5.79333	5.56333	5.87	5.59333	5.57333	6.02	5.79	6.13	5.79	6.08333	5.54	5.30667	5.41333	5.66667	5.94	5.52	6.13333	5.77333	5.43667	6.22	5.71	5.79	5.73667	6.17333
241997_at	TAS2R14	Taste receptor, type 2, member 14	6.58667	6.65667	7.19333	6.69	7.365	7.26	6.75	6.6475	6.91333	6.81667	6.90333	6.42	6.425	6.92333	7.03667	6.61333	6.8	6.98667	7.16333	6.80333	7.3	7.03	6.81	7.21	6.67667	6.82	7.21667	7.02333	7	6.83667	6.34	7.10333	7.09667	6.72	6.96667	6.94667	6.74	7.28	6.34	7.00333	6.93667	6.85333	6.33	6.55	7.01	7.19667	6.98667
242186_x_at	LPHN3	latrophilin 3	3.76	3.57	3.08667	3.15	3.095	2.97	3.03	3.2725	3.21333	3.10667	2.85	4.67	3.725	3.22333	3.73667	3.84333	3.84333	3.42333	2.95	3.38667	3.22	3.03	3.19667	2.89	3.6	3.45	3.61667	3.76667	3.31	3.05	3.45	3.08667	2.78	3.08	3.41	3.20667	3.16	2.96333	2.89	2.81333	2.74333	4.82333	3.05	3.1	3.19	2.78667	2.75333
233791_at	HSD3B1	Hydroxy-delta-5-steroid dehydrogenase, 3 beta- and steroid delta-isomerase 1	3.47333	3.43667	3.39667	3.12	3.26	3.31	3.26333	3.27	3.34	3.2	3.12667	3.33	3.265	3.29667	3.15667	3.11333	3.28667	3.18333	3.16333	3.37333	3.295	3.295	3.20333	3.14667	3.34333	3.3	3.16667	3.16667	3.36	3.19667	3.34	3.15	3.39333	3.17333	3.11333	3.1	3.19667	3.23667	3.34	3.23333	3.46	3.31	3.26	3.33	3.29	3.17667	3.15667
1564883_a_at	TAS1R1	taste receptor, type 1, member 1	4.47	4.56	4.78	4.51	4.745	4.63	4.37333	4.7025	4.59	4.50667	4.46	4.34	4.465	4.65667	4.35667	4.47	4.49333	4.4	4.51333	4.52333	4.645	4.605	4.36	4.6	4.41667	4.5	4.59333	4.4	4.73	4.41333	4.34	4.37333	4.48	4.4	4.51333	4.60667	4.62667	4.98	4.69	4.36667	4.55333	4.59667	4.34	4.8	4.48	4.61667	4.67
1553028_at	GPR156	G protein-coupled receptor 156	4.30667	4.27333	4.41333	4.07	4.625	4.265	4.31	4.5025	4.54	4.25333	4.29	4.1	4.375	4.31333	4.23	4.24333	4.31667	4.08667	4.18	4.21667	4.615	4.325	4.07667	4.37	4.05667	4.52	4.26333	4.18333	4.31	4.13	4.15	4.09667	4.26333	4.25333	4.18	4.05333	4.3	4.62667	4.6	4.21333	4.20333	4.37333	5.09	4.25	4.135	4.55667	4.57
232912_at	GPR180	G protein-coupled receptor 180	3.69333	3.63333	3.64667	3.59	3.39	3.735	3.57667	3.77	3.63	3.62	3.67	3.35	3.46	3.56	3.92333	3.60667	3.62333	3.65667	3.61333	3.68667	3.435	3.42	3.70667	3.57333	3.71667	3.54	4.09	3.86333	3.46	3.62333	3.63	3.58667	3.82667	3.64667	3.64333	3.71667	3.49667	3.51333	3.64	3.46667	3.59	3.50667	4.02	3.73	3.855	3.65	3.41667
206361_at	GPR44	G protein-coupled receptor 44	5.62	5.5	5.93	5.66	5.66	6.05	5.95333	5.765	5.72667	5.76333	5.73667	5.13	5.705	5.74667	5.57333	5.7	5.56667	5.60667	5.78	5.69333	5.635	6.25	5.69	5.51333	5.42	5.39	5.52333	5.53	5.55	5.57667	5.59	5.78667	5.65667	5.61667	5.09667	5.06	5.16	5.56	5.9	5.23667	5.92667	5.25	5.6	5.43	5.12	5.47	5.26
221312_at	GLP2R	glucagon-like peptide 2 receptor	3.86667	3.86333	3.88	3.51	3.82	3.775	3.83667	3.9075	3.72667	4	3.82333	3.77	3.975	3.91667	3.55667	3.82333	3.77	3.82	3.66667	3.71	4.13	4.155	3.84667	3.66	3.76667	4.23	3.71667	3.63	4.5	3.88333	3.85	3.63333	3.75	3.61333	3.66667	3.66333	3.79667	3.69	4	3.79	3.94667	3.79667	4.21	3.93	4.02	3.75333	3.87
204271_s_at	EDNRB	endothelin receptor type B	6.65333	6.36333	7.77333	6.56	7.735	7.36	7.21667	6.935	7.99667	7.92667	6.62333	6.42	5.48	6.08	6.82	5.68333	6.08	6.42667	6.72667	8.25667	6.995	7.225	7.85667	7.37	8.81	5.3	5.94333	7.11333	5.21	7.95333	6.2	7.25	6.09	8.14333	8.52333	9.08667	6.46	6.92667	6.48	6.98333	6.44667	6.62667	6.43	8.54	7.115	7.95	7.50333
240004_at	GRM3	Glutamate receptor, metabotropic 3	4.91667	4.94	4.54333	5.98	4.97	4.93	5.34333	4.845	5.32	5.46	5.29	4.65	4.45	4.91333	5.52333	4.61333	5.22333	5.41333	5.52333	5.95	5.945	5.82	5.31667	5.50667	5.24667	5.08	5.52667	5.34	4.98	5.20667	4.99	5.45	5.43333	4.84333	4.54667	4.18333	4.23	4.31667	4.62	4.58333	4.87333	4.08667	4.1	4.02	4.26	4.23	4.28333
232009_at	EMR2	egf-like module containing, mucin-like, hormone receptor-like 2	2.98333	3.07	3.12	3.06	3.225	3.155	3.15667	3.2125	3.09	3.50667	3.26	3.1	2.95	3.14333	2.92667	2.96	2.93667	3.18333	2.98	3.32667	3.275	3.535	3.09	3.19667	3.02333	3.19	2.94	2.93	3.33	3.15333	2.96	3.03667	3.37333	3.01333	2.87667	2.99	3.12333	3.11333	3.18	3.02333	3.34333	3.19	3.26	3.12	3.11	3.08667	3.2
236092_at	VN1R1	Vomeronasal 1 receptor 1	4.98333	5.20667	4.83333	5.24	4.515	4.595	4.75	5.2525	4.71	4.37333	4.72667	5.23	4.62	5.00667	5.26333	5.00333	5.03	4.99333	4.68333	4.96667	4.435	4.475	4.55667	4.82	4.75333	6.25	6.04333	5.28667	6.12	4.98	4.79	4.90333	4.71667	4.62	4.81667	4.76333	4.33	4.49667	4.55	4.52333	4.83	4.42667	4.78	4.23	4.595	4.69333	4.13667
221375_at	OR1G1	olfactory receptor, family 1, subfamily G, member 1	5.11667	5.32667	5.06667	5.34	5.185	5	5.22667	5.205	4.74333	5.00667	5.21	5.22	5.01	5.27	4.82667	4.98667	5.14667	5.15	5.15333	5.21	5.065	5.25	5.11	5.26333	5.22	5.25	4.97	4.9	5.03	5.06667	5.05	5.13	5.08333	5.09	5.12667	4.97667	5.07667	5.42333	5.57	5.14	5.46333	5.36333	5.23	5.08	5.025	5.42667	5.24667
230147_at	F2RL2	coagulation factor II (thrombin) receptor-like 2	3.01667	3.06333	3.23667	3.1	4.295	3.575	3.64667	3.115	4.31333	4.79	3.36333	2.86	3.225	3.15333	2.91667	2.87	3.15667	3.03	3.14	3.33667	3.435	3.86	3.19	3.46667	3.88	3.03	3.05	2.99333	3.01	3.53333	2.98	3.15	3.18667	3.35667	5.16667	4.20333	3.06333	3.25	3.33	3.22667	3.65667	3.20667	3.13	3.99	3.195	3.23	3.07
241049_at	GRM7	glutamate receptor, metabotropic 7	3.56667	3.74667	3.31333	3.53	3.42	3.55	3.49	3.63	3.17	3.02333	3.37	3.37	3.565	3.72333	3.36	3.62	3.78	3.72667	3.32333	3.76	3.34	3.58	3.53667	3.56333	3.7	3.36	3.48667	3.52	3.21	3.44667	3.31	3.28	3.58333	3.52667	3.38	3.34667	3.26667	3.44667	3.28	3.16	3.25667	3.69333	3.34	3.44	3.095	3.47	3.37
242744_s_at	CASR	calcium-sensing receptor (hypocalciuric hypercalcemia 1, severe neonatal hyperparathyroidism)	3.57667	3.44333	3.25667	3.31	3.17	3.45	3.16333	3.4825	3.16	3.27667	3.24667	3.16	3.06	3.45333	3.03	3.06667	3.15667	3.28333	3.16333	3.30333	3.265	3.19	3.15333	3.19667	3.28667	3.51	3.28333	3.16	3.43	3.20333	3.65	3.12667	3.31333	3.13667	3.15333	3.1	3.29333	3.35667	3.29	3.27333	3.68333	3.29333	3.52	3.26	3.38	3.48333	3.24667
238689_at	GPR110	G protein-coupled receptor 110	3.68	3.85333	4.08333	3.76	4.275	3.905	3.70667	3.91	3.85667	4.04	3.83667	3.92	4.025	3.91333	3.55333	3.75333	3.95333	3.8	3.69333	3.82667	4.015	3.855	3.71333	3.87	3.74	4.13	3.86333	3.52	3.77	3.73	3.83	3.61	3.74667	3.75333	3.79	3.68667	3.82	4.10333	3.69	3.66333	3.75	3.88333	3.93	3.86	3.85	3.84333	3.89667
235496_at	UNQ338	LGLL338	6.00333	6.02	6.39667	6.5	6.43	6.245	5.85333	6.0825	5.96667	6.13667	6.16	6.1	5.94	6.13667	5.72333	5.92333	6.02	5.89333	5.88	5.93667	6.105	6.59	5.93333	5.86	5.84	6.09	5.95667	5.66667	6.03	6.06667	5.92	5.79	5.72667	5.82	6.01333	6.26	8.34333	7.88667	6.26	6.29667	6.40667	7.68667	6.57	6.73	6.81	6.82667	7.74333
220447_at	HRH3	histamine receptor H3	6.34	4.89	6.03	4.49	5.33	5.245	4.58667	6.67	4.58667	4.49	4.40333	4.68	5.06	5.26667	4.88	5.22333	5.24333	4.81	5.85	7.07	7.175	5.94	4.37	4.52667	4.61	5.17	5.41667	4.81667	5.66	4.50667	4.24	4.76333	4.42333	4.47	4.06	3.99667	4.11333	4.47333	4.55	4.08667	4.37333	4.31333	4.51	4.24	3.965	4.30333	4.48
223531_x_at	GPR89A /// LOC653519	G protein-coupled receptor 89A /// similar to G protein-coupled receptor 89	6.79667	7.09333	6.73667	7.02	6.8	6.88	7.31667	6.835	7.55333	7.24	7.18667	7.07	7.21	7.13667	7.40667	7.16	7.15333	7.23667	7.23333	7.45	7.48	7.15	7.51667	7.20333	7.66333	7.31	7.64	7.43333	7.62	7.60333	8.06	7.47667	7.35667	7.52333	7.82333	7.62667	6.97667	7.16667	6.91	7.28	6.84	7.14333	7.15	7.34	7.665	7.34667	7.1
206170_at	ADRB2	adrenergic, beta-2-, receptor, surface	5.06	5.69333	5.07333	4.86	4.855	4.695	6.03667	5.255	4.86	4.76	6.62	4.62	4.795	5.59333	5.23667	5.09333	5.23	5.53	5.56667	5.4	4.82	5.19	6.22	6.07	5.8	4.77	4.70333	5.19333	5.23	5.86333	5.37	6.30667	6.18	6.25	5.94333	5.99333	6.09	6.14667	6.04	6.45667	6.06	5.88	6.49	5.88	7.045	7.84	6.88333
214560_at	FPRL2	formyl peptide receptor-like 2	4.17	4.26333	4.48333	4.18	4.59	4.56	4.33667	4.3325	4.42333	4.38333	4.25333	4.21	4.475	4.38	4.04333	4.19333	4.32	4.26	3.87333	4.30333	4.47	4.34	4.08	4.27667	4.20667	4.24	4.06667	3.9	4.84	4.20333	4.37	3.96667	4.24667	4.22333	4.23	4.08	4.53	4.60333	4.67	4.33667	4.67333	4.63667	4.9	4.78	4.51	4.53667	4.94667
236608_at	GPR113	G protein-coupled receptor 113	2.80333	2.81	2.70333	2.75	2.825	2.755	2.86667	2.83	2.81333	2.69	2.77	2.71	2.635	2.71	2.75	2.67	2.83333	2.83667	2.75333	2.69	2.73	2.89	2.71333	2.80333	2.63667	2.96	2.94667	2.75667	2.81	2.8	2.66	2.69	2.65333	2.68	2.76	2.72	2.74333	2.74333	2.64	2.69667	2.86667	2.68667	2.86	2.7	2.915	2.76667	2.74333
241085_at	GPR135	G protein-coupled receptor 135	3.66667	3.81333	3.90333	3.58	3.955	4.33	3.88333	3.6575	3.82667	3.71667	3.78333	3.49	3.855	3.59667	3.57	3.72667	3.88333	3.76	3.49	3.69667	3.96	4.175	3.59667	3.69333	3.76667	3.59	3.89667	3.54	3.81	3.51	3.93	3.58	3.73	3.78333	3.64	3.32	3.59667	3.79667	3.75	3.79	4.11667	3.55667	4.01	3.73	3.36	3.65667	3.82
238384_x_at	GPR39	G protein-coupled receptor 39	2.72333	2.71	2.55333	2.77	2.735	2.595	2.45333	2.7525	2.70667	2.72333	2.6	2.62	2.42	2.60667	2.46333	2.66	2.41333	2.55	2.50667	2.56667	2.89	2.575	2.73667	2.56333	2.54	2.88	2.56	2.48667	2.62	2.58	2.69	2.48667	2.66	2.57333	2.43333	2.47667	2.46667	2.44667	2.51	2.50667	2.48	2.59667	2.56	2.71	2.56	2.45333	2.50667
1570384_at	TAS2R14	Taste receptor, type 2, member 14	2.78333	2.68	2.72333	2.69	2.76	2.635	2.67333	2.805	2.71	2.73667	2.76	2.54	2.645	2.68667	2.64667	2.62667	2.7	2.68333	2.62	2.73667	2.705	2.815	2.60333	2.73	2.7	2.55	2.74667	2.58667	3.12	2.52	2.62	2.68	2.66	2.66	2.76333	2.58	2.67	2.69333	2.77	2.74	2.54667	2.57333	2.65	2.67	2.575	2.72	2.59667
1555229_a_at	C1S	complement component 1, s subcomponent	3.82	3.83	3.59333	3.71	3.835	4.02	3.6	3.63	3.58667	3.83667	3.90333	4.14	4.11	3.48667	3.47333	3.51	3.69667	3.66	3.43667	3.41667	3.83	3.855	3.70667	3.83333	3.66667	3.33	3.53667	3.47667	3.32	3.51667	4.34	3.62	3.85333	4.45	6.29667	4.53	5.84333	4.96	6.04	6	4.78	5.01667	6.22	9.21	6.67	4.56333	7.73333
208183_at	TACR3	tachykinin receptor 3	3.9	3.89667	4.02667	3.83	4.085	4.27	3.91667	3.8075	4.21	4.10667	3.75	3.8	3.9	3.76333	3.64	3.79	4.02667	3.73333	3.74	3.77667	4.535	4.005	3.66333	4.04	3.90667	3.78	3.70333	3.69333	3.92	3.58	3.9	3.73	3.71667	3.94	3.68667	3.67333	4.31667	4.53333	4.34	4.07667	3.93333	3.94667	4.36	4	4	4.17333	4.60667
1567286_at	OR5L2	olfactory receptor, family 5, subfamily L, member 2	5.01	5.03333	4.96	5	4.665	4.71	5.19	5.0075	4.33	4.53667	5.04667	5	5.18	5.05667	4.88	4.90333	5.06	4.94667	5.00667	4.80333	4.47	4.83	4.94	5.30667	4.94667	4.83	5.08333	4.87667	5.48	4.71	5.13	4.76	5.2	5.05667	5.05667	4.89667	5.05	5.28667	5.43	4.72667	5.16667	4.95	5.33	4.6	4.84	5.15	5.16333
206564_at	OPRL1	opiate receptor-like 1	5.53667	5.48	5.64333	5.66	5.21	5.14	5.09667	5.7175	5.37667	5.41	5.24	5.47	5.85	5.67	5.35667	5.48	5.42333	5.58667	5.22667	5.66333	5.705	5.265	5.07	5.00667	5.29667	5.33	5.19	5.34667	5.91	5.16	5.69	5.07667	5.13333	4.88	5.17	5.04	5.18	5.34	5.25	4.82667	4.97333	5.19667	5.64	5.24	5.15	5.31333	5.30333
1567282_at	OR1J4	olfactory receptor, family 1, subfamily J, member 4	4.25	4.35333	4.06333	4.15	3.985	4.14	4.02	4.255	4.01333	4.18667	3.93667	4.34	4.115	4.20333	3.86333	3.82667	4.16667	4.21333	4.1	4.27333	4.145	3.885	4.15	4.14667	4.06667	4.3	4.22	3.99667	4.31	4.21	4.35	3.84667	4.14	3.98	3.92333	4.07667	4.27333	4.09667	4.5	4.07	4.25333	4.38333	4.46	4.45	4.5	3.97667	4.05
1563720_at	GPR141	G protein-coupled receptor 141	3.51667	3.23	3.04667	3.75	3.47	3.15	3.23333	3.2425	3.18667	3.37	3.27333	3.24	3.22	3.14667	3.12	3.11	3.16333	3.62333	3.19667	3.49333	3.27	3.295	3.12667	3.37667	3.18667	3.27	3.24667	3.08	3.55	3.19	3.22	3.27	3.41333	3.25	3.25333	3.28333	3.19667	3.35333	3.18	3.22	3.33667	3.15	3.14	3.16	3.445	3.51333	3.26667
1553031_at	GPR115	G protein-coupled receptor 115	3.80667	3.87	3.98	3.93	4.275	3.87	4.23333	4.005	3.65	3.75667	4.19333	3.62	4.375	4.15667	3.78667	3.99333	4.07667	4.13	3.93667	4.08667	4.065	3.8	3.86333	4.18	3.75	4.07	3.92333	3.80667	3.83	3.71333	3.69	4.01333	3.98333	3.68667	3.89667	3.98333	4.23333	4.33667	4.23	3.98667	4.02333	4.06667	4.39	3.94	4.52	4.09667	4.23333
221397_at	TAS2R10	taste receptor, type 2, member 10	3.16333	3.24	2.90333	3.17	3.19	3.235	3.15667	3.11	2.93667	2.89	3.14667	3.13	2.945	3.15333	3.39667	3.14333	3.28	3.20333	3.17667	3.17333	3.295	3.07	3.13667	3.04333	3.05	3.47	3.07667	3.49667	3.3	3.11667	2.85	3.34667	3.30667	3.21333	3.07	3.03333	2.96	2.99	3.11	3.25	3.30667	3.05667	3.03	2.77	3.1	2.98333	3.05
236172_at	LTB4R	Leukotriene B4 receptor	4.84667	4.73667	5.54667	4.61	5.665	5.52	4.78667	4.74	5.02333	5.46333	4.81	4.62	4.77	4.92	4.51	4.82333	4.64667	4.53	4.64	4.78	5.445	5.59	4.42	4.74	4.60667	4.69	4.84667	4.35333	5.04	4.76	4.75	4.65	4.72667	4.9	4.56667	4.68	4.97333	5.24	5.1	4.83333	5.21333	4.69	5.28	4.96	6.27	4.97	5.42333
1567284_at	OR1J4	olfactory receptor, family 1, subfamily J, member 4	4.24333	4.19333	4.11333	4.13	4.12	4.02	4.37	4.34	4.08667	4.33333	4.24667	4.01	4.26	4.26	3.94333	4.00667	4.12333	4.26667	4.24	4.10667	4.185	4.375	4.16	4.26333	4.06333	4.5	4.22333	4.18333	4.41	4.02	4.49	4.09333	4.31333	4.10667	4.02	4.00667	4.05667	4.36667	4.44	4.26667	4.69333	4.07667	4.67	3.77	3.935	4.19	4.21333
210659_at	CMKLR1	chemokine-like receptor 1	4.78333	4.58667	5.13	4.45	4.91	4.6	4.64	4.8875	4.90333	4.61333	4.75667	4.96	4.6	4.89	4.59333	4.62667	4.71667	4.65667	4.68	4.84667	4.88	5.035	4.6	4.55333	4.45667	4.9	4.39667	4.39667	4.89	4.64333	4.92	4.61	4.7	4.39667	4.90333	5.07	5.39667	6.00333	5.08	4.83	4.71	5.87	5.13	5.23	4.95	4.95	5.07333
205890_s_at	GABBR1 /// UBD	gamma-aminobutyric acid (GABA) B receptor, 1 /// ubiquitin D	4.35333	4.45	4.58667	4.62	4.8	4.365	4.42667	4.3375	4.28667	4.31667	4.53333	4.22	4.62	4.53	4.46333	4.35667	4.52667	4.48	4.34333	4.38333	4.605	4.405	4.35	4.57	4.3	4.46	4.43667	4.34333	4.38	4.40333	4.57	4.45	4.43667	4.54667	5.2	6.19	4.59667	4.82333	4.32	4.48	4.39	5.14	5.03	6.35	6.815	4.93333	6.25
207510_at	BDKRB1	bradykinin receptor B1	5.8	5.73	5.61333	6.44	5.37	5.59	5.94	5.8575	5.38667	5.33667	5.61	5.74	5.58	5.73667	5.47667	5.61667	5.90667	5.75	5.69	5.82	5.495	5.68	5.64667	5.86333	5.74333	6.38	5.85333	5.63	6.05	5.75	5.79	5.61333	5.83	5.76667	5.83667	5.83667	5.99667	6.81	6.15	6.27	6.02667	5.96	7.27	6.74	5.745	7.5	5.77
215225_s_at	GPR17	G protein-coupled receptor 17	4.83667	4.85333	4.26333	5.01	4.57	4.865	4.71	4.58	4.47	4.49667	4.65667	4.49	4.205	4.76667	4.40333	4.24333	4.71	4.64333	4.6	4.69333	4.135	4.63	4.68	4.80333	4.63	3.78	4.03667	4.35	3.77	4.73333	4.11	4.99	5.52333	5.03	3.77	3.78333	4.03667	3.83333	4.28	3.94	4.04	3.84333	4.26	3.7	3.66	3.59333	3.87
230278_at	GPR137B	G protein-coupled receptor 137B	3.71	3.65667	4.14667	3.28	4.22	4.055	3.51667	3.575	3.85667	3.58	3.72667	3.31	3.235	3.18333	3.88333	3.37667	3.5	3.57667	3.63	3.36667	3.64	3.63	3.40667	3.91667	3.52667	3.09	3.35333	4.06667	3.16	3.50667	3.06	3.96	3.52	3.82667	4.95	4.72333	3.13333	3.34	3.94	4.01333	3.85333	3.08	3.28	3.38	3.275	3.38	3.14333
232482_at	OR51E2	olfactory receptor, family 51, subfamily E, member 2	3.23667	3.26	3.10667	2.97	3.4	3.455	3.34	3.245	3.25333	3.27	3.07667	3	2.96	3.17	3.03667	3.08	3.26	3.19	3.03333	3.24333	3.27	3.48	3.18667	3.29	3.17667	3.28	3.26667	3.03	3.37	3.09667	3.05	3.08	3.12	3.14667	2.97667	3.03333	3.09333	3.31	3.37	3.36667	3.39667	3.10333	3.53	3.46	3.045	3.15333	3.12667
1567656_at	OR2H1	Olfactory receptor, family 2, subfamily H, member 1	2.6	2.50333	2.58667	2.53	2.475	2.55	2.54667	2.5075	2.75333	2.84	2.48333	2.46	2.53	2.52667	2.42	2.49333	2.52333	2.50333	2.50667	2.41	2.57	2.685	2.58	2.46667	2.48	2.67	2.65	2.45	2.65	2.54333	2.42	2.52667	2.54333	2.51667	2.54	2.48	2.55333	2.52667	2.51	2.47333	2.56333	2.57667	2.56	2.73	2.495	2.64333	2.51
204642_at	EDG1	endothelial differentiation, sphingolipid G-protein-coupled receptor, 1	7.29333	6.99333	7.17	7.27	7.595	7.14	7.86667	6.9675	7.1	7.04	7.22	6.93	6.135	6.48	6.79	6.68	7.32667	7.00667	6.79	6.75	6.675	6.405	7.32667	7.28	7.22667	6.04	6.79	7.12	6.44	6.79	6.31	6.76333	6.34333	6.87	5.98333	5.82	6.73	6.80667	7.23	7.68667	7.73667	6.73667	7.06	9.19	7.05	7.76	7.7
217077_s_at	GABBR2	gamma-aminobutyric acid (GABA) B receptor, 2	6.49333	9.27667	6.45333	6.11	6.395	6.835	7.39333	6.4675	8.29333	7.45333	5.00667	10.02	9.7	9.46333	9.01333	9.99667	9.73333	8.36333	8.53333	9.86333	10.34	9.26	7.11667	6.78333	8.09	8.42	8.93667	9.29667	8.89	7.56	9.04	6.11333	5.49	6.29667	7.34333	6.50333	4.66333	5.13667	6.1	5.18667	5.86333	4.85333	5.84	4.66	5.125	5.15667	4.90667
203989_x_at	F2R	coagulation factor II (thrombin) receptor	2.96333	3.03667	2.93333	2.88	3.085	2.97	3.13333	2.7725	2.66	2.64	3.14333	3.24	2.67	3.09667	2.90333	2.97333	3.08	2.92	3.27667	3.09	2.54	2.78	2.80667	3.11667	2.99	2.84	2.90333	2.87333	3.01	3.24667	2.98	2.85667	3.38	3.49	3.32	2.82667	5.33333	3.65667	3.56	4.18667	4.32	4.93	3.46	6.08	3.95	3.23333	3.30667
237349_at	TSHR	Thyroid stimulating hormone receptor	5.38	5.72667	5.56333	5.7	5.275	5.415	5.28667	5.525	5.23667	5.22667	5.37667	4.86	5.07	5.34	4.99667	4.99	5.19333	5.64333	5.11667	5.57	5.215	5.095	5.57333	5.56333	5.41	5.42	5.33	5.10333	5.47	5.36667	5.38	5.30667	5.37	5.30667	5.17	5.12	5.29	5.56333	5.61	5.70333	5.80667	5.45	5.89	5.06	5.1	5.55333	5.28667
243555_at	EDNRA	Endothelin receptor type A	3.15333	3.20667	3.25333	3.15	3.345	3.52	3.48333	3.1925	3.15667	3.27667	3.21333	3.18	3.14	3.15667	3.10333	3.25667	3.35	3.18667	2.99	3.27	3.095	3.14	3.19333	3.42	3.24667	3.23	3.16667	3.09	3.52	3.16333	3.3	3.17667	3.2	3.21333	3.58	3.25667	3.42	3.89	3.45	3.84667	3.6	4.02	4.59	3.43	3.175	3.48333	3.44
221459_at	TAAR5	trace amine associated receptor 5	5.09333	5.24333	4.77667	4.86	5.1	4.76	4.90333	5.0825	4.82333	5.00667	5.04	4.75	4.835	5.16667	4.94667	5.04	5.00667	5.04333	5.00667	4.97	5.165	4.815	4.9	5.01333	4.92333	5.18	4.74667	4.77667	4.86	4.83333	4.94	4.81667	5.07	5.02333	4.86333	4.88333	5.16	5.43	5.36	5.14667	5.20667	5.04	5.21	4.97	5.22	5.26	5.35
1555377_at	OR4D2	olfactory receptor, family 4, subfamily D, member 2	4.25	4.28	4.30333	3.91	4.835	4.655	4.68667	4.0975	4.26667	4.26333	4.31333	4.08	4.435	4.11	3.91	4.13	4.38	4.23	4.03333	4.36333	4.17	4.08	4.13	4.32	4.03667	4.39	4.16	3.95	4.4	4.02	4.12	4.11667	4.17	4.13667	4.24667	3.96333	3.89333	4.62	4.2	4.26667	4.57667	4.19667	4.67	4.05	3.92	4.37	4.55333
228313_at	GPRC5B	G protein-coupled receptor, family C, group 5, member B	4.44333	4.63667	4.44	4.48	4.16	4.93	4.33667	4.8275	4.32667	4.68	4.12667	4.36	4.43	4.44333	4.24667	4.14667	4.24667	4.38333	4.41667	4.36333	4.245	4.92	4.46667	4.32	4.10667	5.02	4.40667	4.46333	5.18	4.38333	4.65	4.40667	4.35667	4.22	4.26333	4.33667	4.52333	4.40667	4.65	4.49667	4.69333	4.36333	5.09	4.17	4.46	4.42	4.48
207619_at	HCRTR1	hypocretin (orexin) receptor 1	3.77667	3.65	3.27333	3.61	3.21	3.285	3.54	3.5525	3.17667	3.28	3.44	3.29	3.655	3.63333	3.34333	3.32	3.58333	3.69667	3.49	3.58	3.315	3.425	3.46333	3.45	3.57667	3.44	3.47667	3.27333	3.5	3.43	3.51	3.28	3.44	3.49333	3.36	3.35667	3.51	3.55333	3.69	3.56	3.57333	3.33333	3.92	3.35	3.54	3.51667	4.16667
207610_s_at	EMR2	egf-like module containing, mucin-like, hormone receptor-like 2	3.33333	3.17333	3.45333	3.62	4.015	3.85	3.66	3.4275	3.72333	3.67667	3.73	3.62	3.635	3.39667	3.51	3.26667	3.34667	3.56333	3.73	3.40333	3.635	3.605	3.49667	3.98667	3.43333	3.27	3.47667	3.47333	3.23	3.50333	3.49	3.85	3.93667	3.61	3.56333	3.7	3.55	3.57333	3.46	3.39333	3.46333	3.49667	3.55	3.35	3.67	3.78	3.65
1565947_a_at	CHML	Choroideremia-like (Rab escort protein 2) /// MRNA, differentially expressed in malignant melanoma, clone MM A2	3.25	3.22667	3.53333	3.01	3.415	3.765	3.58	3.35	3.35333	3.32	3.87	3.41	3.795	3.59	3.36667	3.43333	3.46667	3.25	3.50333	3.33	3.545	3.71	3.38333	3.64	3.25	3.31	3.42	3.21	3.86	3.45	3.23	3.53333	3.59333	3.61333	3.39333	3.45	3.45667	3.93667	3.2	3.30667	3.36667	3.45	3.79	3.56	3.415	3.62	3.5
216289_at	GPR144	G protein-coupled receptor 144	6.70333	6.57	6.99667	6.76	6.375	6.655	6.28667	6.64	6.71667	6.73333	6.36667	6.36	6.315	6.50667	6.14333	6.28333	6.19333	6.60333	6.13667	6.65667	7.22	6.92	6.54667	5.90333	6.31667	7.07	6.16667	6.3	6.52	6.37667	6.65	6.29667	6.33	5.84667	5.48667	5.98667	5.90333	6.03	7.31	6.26333	6.7	6.29333	7.36	6.4	6.415	5.81667	6.10333
1555097_a_at	PTGFR	prostaglandin F receptor (FP)	3.09333	3.26667	3.49	3.09	3.195	3.33	3.16333	3.17	3.09667	3.41667	3.24667	3.11	3.235	3.19333	3.21333	3.14	3.14333	3.22	3.10667	3.25667	3.37	3.255	3.14	3.14333	3.12333	3.03	3.01333	3.16667	3.07	3.18333	3.12	3.14333	3.13667	3.14333	3.76333	3.27333	3.29333	3.42	3.27	3.20667	3.16667	3.29333	3.71	4.46	3.515	3.38	3.82667
208521_at	OR5I1	olfactory receptor, family 5, subfamily I, member 1	4.21	4.64667	4.73667	4.72	4.38	4.535	4.77	4.4375	4.58	4.2	4.74	4.32	4.39	4.4	4.33	4.33333	4.75667	4.71	4.29667	4.66	4.36	4.42	4.39333	4.74333	4.59333	4.42	4.39333	4.13667	4.75	4.45667	4.4	4.44	4.48667	4.28333	4.32	4.24	4.59	4.81667	4.92	4.63667	4.88	4.22333	4.74	4.18	4.41	4.56667	4.56333
1562678_at	HTR4	5-hydroxytryptamine (serotonin) receptor 4	4.47	4.06	4.40667	3.78	4.255	4.14	4.11	4.2325	3.45667	3.71	3.89667	3.51	3.91	4.02333	3.88333	3.70333	4.21667	4.21333	3.65	4.09333	4.125	3.92	3.78333	4.13667	3.79333	3.82	3.60667	3.66667	4.29	3.80667	3.4	3.75	3.95	3.94667	3.78667	3.76667	3.76333	4.36667	4.24	4.17667	4.17667	3.91667	4.2	3.55	3.865	3.88333	3.78667
208465_at	GRM2	glutamate receptor, metabotropic 2	5.13667	5.63667	5.82667	5.41	6.1	5.885	5.15667	5.42	5.99333	5.82	5.34	5.95	6.11	5.80333	5.69	6.12333	6.13	5.44667	5.3	5.41	6.41	5.955	5.26333	5.24667	5.15	5.63	5.25667	5.61	5.56	5.46	5.93	5.03333	5.18	5.48667	5.20333	4.97333	5.57333	5.52667	5.92	5.18	5.61333	5.66333	6.25	5.51	5.265	5.33	5.82333
229686_at	P2RY8	purinergic receptor P2Y, G-protein coupled, 8	4.51667	4.57333	4.69333	5.18	4.39	4.885	4.66333	4.99	4.64	4.65667	4.78667	4.55	4.69	4.72667	4.53333	4.70667	4.58333	4.91667	4.77333	4.85667	4.775	4.405	4.88	4.90667	4.73	4.7	4.86667	4.64667	4.96	4.89	4.82	4.89	4.77667	4.84333	4.67667	5.11	5.17	5.32333	5.24	5.11667	5.21667	5.27	5.49	5.77	5.52	6.01	5.58333
214619_at	CRHR1	corticotropin releasing hormone receptor 1	5.95667	6.36	5.97667	5.88	6.115	6.035	5.5	5.8075	6.03667	6.05	5.64667	6.09	5.88	5.91333	5.93667	6.05	5.8	5.70333	5.73	6.41333	6.645	6.405	5.65333	5.34667	5.60333	6.17	6.76	5.88333	6.57	5.74	6.03	5.66333	5.61333	5.39	5.16667	5.22	5.41667	5.63	6.2	5.34667	5.89333	5.51667	5.86	5.97	5.465	5.57667	5.66667
1553560_at	VN1R4	vomeronasal 1 receptor 4	3.90667	4.04	4.29667	3.91	3.82	4.12	3.99333	4.1125	3.67667	3.60333	3.88667	4.02	4.065	4.25333	3.94	3.93667	3.99667	3.92667	3.96667	3.82667	3.95	3.96	4.02	3.96667	3.81	4.41	4.15667	3.77	4.45	3.7	4.14	3.84	3.90333	3.98	3.90333	4.05	3.92	4.13333	4.01	3.72	3.95	3.98667	4.08	3.99	3.965	4.14333	3.74333
208260_at	AVPR1B	arginine vasopressin receptor 1B	6.55667	6.24667	7	6.26	6.655	6.855	6.52	6.52	6.61667	6.96	6.67	6.25	6.72	6.49667	6.28667	6.56667	6.62667	6.58667	6.35667	6.36333	6.86	6.685	6.48333	6.62667	6.29	6.43	6.12	6.27333	6.89	6.45	6.56	6.35667	6.37667	6.53667	6.40333	6.30333	6.74	6.85667	6.75	6.35	6.60333	6.58	6.94	6.65	6.465	6.61333	6.90667
210940_s_at	GRM1	glutamate receptor, metabotropic 1	4.63667	4.64667	4.94333	5.07	4.95	4.77	4.45667	4.7975	4.70667	4.78667	4.46667	4.84	4.425	4.59667	4.38333	4.66	4.41333	4.57	4.4	4.48667	5.12	5.11	4.2	4.48	4.38	5	4.63	4.35333	5.46	4.41333	4.58	4.43	4.39667	4.41333	4.22333	4.34667	4.69333	4.6	4.81	4.62333	4.71	4.53	4.89	4.93	4.365	4.59333	4.68
205481_at	ADORA1	adenosine A1 receptor	7.08667	7.38	7.01667	7.85	7.17	6.925	7.29667	7.67	7.14	7.14	7.45333	7.32	7.2	7.30333	8.19333	7.51667	6.90333	7.72333	8.38	8.26	7.975	7.23	7.89333	7.85667	7.45	6.06	6.21	7.86	6.28	7.52	7.73	8.16333	7.68667	6.55	5.32333	5.23	4.89	5.56333	5.51	5.98	5.52	5.15333	5.76	5.77	5.15	5.55333	5.89667
216255_s_at	GRM8	glutamate receptor, metabotropic 8	3.48333	3.20333	3.77333	3.39	3.47	3.1	3.32333	3.2975	3.11333	3.42	3.21333	3.32	3.475	3.41667	3.29333	3.48667	3.42333	3.10667	3.09333	3.33	3.355	3.775	3.44	3.26667	3.49	3.33	3.09	3.17667	3.45	3.43333	3.86	3.17	3.13	3.31667	3.13667	3.17	3.51667	3.30333	3.36	3.19667	3.19	3.38	3.66	3.31	3.28	3.17	3.31
216938_x_at	DRD2	dopamine receptor D2	7.41667	5.4	6.96	5.25	6.16	5.89	6.44333	7.7875	6.65667	6.5	5.50667	5.3	5.4	5.37667	5.28333	5.41	5.45	5.21	5.85	5.53	5.775	5.59	5.44667	6.09	5.34667	5.23	5.44333	5.24	5.54	5.30333	5.29	5.2	5.36667	5.37667	5.18	5.23333	5.40667	5.77	5.46	5.24333	5.41667	5.24333	5.45	5.13	5.19	5.30333	5.58667
207183_at	GPR19	G protein-coupled receptor 19	6.19667	6.32667	5.65	5.41	5.39	5.47	6.20667	6.2175	5.28	5.52333	6.06667	6.44	5.78	5.98667	5.94333	5.98667	6.22	5.91667	5.82667	6.44	5.675	5.89	6.06667	6.18	6.40667	6.03	6.26333	5.80667	5.95	5.91	6.03	5.77333	5.48667	6.17	4.87	4.76667	4.62667	5.1	5.13	5.02	5.35667	4.41	5	4.09	4.48	4.96	4.91667
239533_at	GPR155	G protein-coupled receptor 155	8.63333	7.41	8.65	6.23	7.435	7.14	6.56	8.53	6.53333	6.08333	5.74333	7.91	7.79	7.05667	7.37333	8.17333	8.1	7.6	7.15333	7.53667	7.295	6.79	7.12667	6.05	7.41667	7.08	7.39	7.53333	6.14	7.49	7.03	6.59667	6.03333	7.32667	9.09667	9.78	5.51333	5.19333	6.54	6.15333	5.78	6.45333	4.75	4.88	5.415	4.82667	4.76333
208482_at	SSTR1	somatostatin receptor 1	4.38333	4.30333	4.44667	4.58	4.62	4.54	4.36667	4.7025	4.88667	4.73667	4.29	4.47	4.905	4.36667	4.08333	4.38333	4.39667	4.54333	4.4	4.46	4.6	4.68	4.29	4.47667	4.14667	4.69	4.40667	4.34	4.89	4.29	4.78	4.28333	4.49667	4.33	4.29	4.53	4.74333	4.88667	4.78	4.26	4.48	4.45	5.04	4.39	4.35	4.58	4.73333
1559753_at	GPR133	G protein-coupled receptor 133	4.8	5.01333	4.68333	5.06	4.785	4.71	4.70667	4.985	4.45	4.40333	4.72333	4.67	4.68	4.83667	4.6	4.66	4.85	4.69333	4.75667	4.64333	5.255	4.495	4.74333	4.69667	4.66	5.12	5.01333	4.52667	5.06	4.76	4.63	4.49667	4.88	4.66333	4.55667	4.75667	4.76667	4.78333	5	4.68333	4.83667	4.97667	4.9	4.99	4.68	4.72667	4.92667
216464_x_at	GPR44	G protein-coupled receptor 44	4.39333	4.00333	3.98667	3.99	4.36	4.15	3.85333	4.41	4.41333	4.31	3.91	3.99	4.25	4.01	3.89333	3.99	4.01	4.02	4.19	4.00333	4.18	4.185	3.88	3.93	3.92667	4.7	4.08	3.93333	4.42	3.96	4.15	3.9	4	3.84667	3.96667	4.03	4.5	4.39333	4.53	4.18667	4.41667	4.11667	4.55	4.27	4.235	4.12	4.61667
211897_s_at	CRHR1	corticotropin releasing hormone receptor 1	3.59	4.24333	4.22667	3.79	4.16	4.4	3.81667	4.0075	4.30667	4.21333	3.86	4.47	4.415	4.18	3.91667	4.19	3.98667	3.78	3.95667	4.07333	4.465	4.79	3.76	3.78667	3.71667	4.74	5.12	3.77333	5.25	3.94333	4.37	3.88333	3.91333	3.70667	3.74	3.76333	4.30667	4.20333	4.12	3.82667	3.78667	4.09333	4.57	3.76	4.01	4.17	4.63667
207897_at	CRHR2	corticotropin releasing hormone receptor 2	4.64667	4.37667	4.86667	4.8	4.955	5.165	4.84667	4.42	4.96333	4.68667	4.68	4.39	4.725	4.74	4.32667	4.52	4.45667	4.53333	4.38333	4.65667	5	4.865	4.42333	4.45667	4.43333	4.94	4.42333	4.41	4.73	4.39667	4.41	4.52333	4.47	4.53	4.10333	4.33	4.84667	4.83333	4.62	4.66667	4.79667	4.53667	5.06	4.46	4.305	4.49333	4.68333
1553063_at	GPR78	G protein-coupled receptor 78	4.71667	4.62	5.22333	4.23	4.89	5.295	4.67667	4.615	5.15333	4.97	4.92667	4.54	4.73	4.68333	4.46667	4.65667	4.74667	4.51	4.67	4.42333	5.565	5.15	4.41667	4.87	4.50333	4.72	4.47333	4.32333	4.92	4.53	4.44	4.61333	4.57333	4.73333	4.45667	4.50667	5.24667	5.44333	5.1	4.8	4.98	4.75667	5.55	4.79	4.84	5.08333	5.44
1553555_at	TAS2R38	taste receptor, type 2, member 38	5.57667	5.75	5.46333	5.2	5.485	5.34	5.67333	5.455	5.05333	5.28667	5.68667	5.61	5.635	5.57	5.48333	5.49	5.74	5.69333	5.45333	5.71667	5.475	5.1	5.42	5.78667	5.58	5.65	5.78333	5.41333	5.66	5.54	5.42	5.62667	5.62333	5.62333	5.73667	5.7	5.73667	5.92	5.61	5.58333	5.64	5.74	5.84	5.43	5.7	5.69	5.85
233427_x_at	GPR64	G protein-coupled receptor 64	8.77333	8.83333	8.84333	9.12	8.715	8.485	8.69	9.0625	8.58333	8.56333	8.87667	8.47	8.15	8.99667	8.55667	8.71	8.72667	8.94	8.99333	8.92	8.31	8.7	8.89	8.93667	8.86	9.3	9.32333	8.56	9.03	9.01333	8.57	8.73333	9.14	8.79	8.50333	9.01333	8.49667	8.84333	8.21	8.47667	8.71	8.69	8.41	8.81	8.705	8.44333	8.39
220088_at	C5AR1	complement component 5a receptor 1	3.54333	3.86667	3.69667	3.44	3.64	3.43	3.74667	3.4375	3.66	3.56333	4.07	3.16	3.48	3.56	3.36667	3.5	3.56	3.54	3.67333	3.67667	3.7	3.725	3.83333	4.45667	3.70667	3.59	3.50667	3.49	3.47	4.03333	3.43	3.98333	3.97333	5.04333	4.95333	5.40333	5.98	5.31333	3.79	4.53333	4.09667	4.76	4.26	6.23	3.995	5.8	4.64
1567285_at	OR5L2	olfactory receptor, family 5, subfamily L, member 2	4.38	4.73	4.76	4.87	4.81	4.925	4.49333	4.6125	4.73333	4.73333	4.43667	4.43	4.3	4.62333	4.23667	4.26	4.56667	4.54667	4.37667	4.61667	4.85	4.605	4.46667	4.51333	4.48667	4.97	4.52333	4.27667	4.5	4.42333	4.72	4.29	4.40667	4.24	4.38	4.30667	4.4	4.50333	4.65	4.55	4.67	4.56	4.62	4.56	4.315	4.37667	4.50333
1562162_at	GABBR2	Gamma-aminobutyric acid (GABA) B receptor, 2	3.24667	3.87333	3.39	3.52	3.48	3.385	3.48667	3.4225	3.13	3.41333	3.39	3.26	3.74	3.99667	3.80667	3.90667	4.01333	3.58	3.45	3.75667	3.475	3.44	3.27	3.45	3.43333	3.71	3.93667	3.63667	3.93	3.43	3.28	3.16667	3.38333	3.32333	3.27667	3.14667	3.29667	3.57	3.71	3.34333	3.47667	3.22	3.6	3.3	3.29	3.49	3.25667
208516_at	MTNR1B	melatonin receptor 1B	4.34667	4.22333	4.93	4.55	4.655	4.77	4.36667	4.3025	4.91333	4.79	4.48333	4.38	4.475	4.41	4.15667	4.38	4.31	4.27	4.23333	4.31	4.82	4.965	4.18667	4.24333	4.09333	4.8	4.05333	4.08667	4.44	4.3	4.64	4.19	4.19	4.23333	3.93	3.99333	4.47333	4.54333	4.62	4.21333	4.31333	4.33333	4.79	4.4	4.265	4.18	4.77333
233743_x_at	EDG8	endothelial differentiation, sphingolipid G-protein-coupled receptor, 8	5.44333	5.09	5.27	6.19	5.35	5.17	5.48333	5.315	5.03333	5.26667	5.67	5.54	5.725	5.56333	5.49333	5.23667	5.18333	5.49	5.48667	5.22	5.23	5.31	5.56333	5.55333	5.41667	5.54	5.66333	5.32667	5.78	5.38333	5.64	5.51667	6	5.33	4.85667	5.14333	5.61667	5.63333	5.28	4.95667	5.09	5.25667	5.52	5.17	5.53	5.10667	5.27333
43934_at	GPR137	G protein-coupled receptor 137	6.94667	6.66333	6.40333	6.46	6.39	6.49	6.52667	6.685	6.29667	6.23667	6.69	6.41	6.665	6.54667	6.52667	6.77667	6.71333	6.57	6.46333	6.4	6.335	6.53	6.44	6.53333	6.52333	6.57	6.62	6.53333	6.72	6.33333	6.67	6.56667	6.59333	6.62333	6.46333	6.27	6.42333	6.53	6.67	6.4	6.46	6.28333	6.66	6.28	6.46	6.39	6.90333
236121_at	OR51E2	olfactory receptor, family 51, subfamily E, member 2	3.34333	3.52333	3.66667	3.34	3.615	3.53	3.50667	3.3025	3.39667	3.62333	3.57333	3.17	3.595	3.35	3.28667	3.39	3.49	3.47333	3.29667	3.42333	3.825	3.345	3.64333	3.93	3.42667	3.24	3.42	3.44	3.91	3.57	3.69	3.42667	3.5	3.53	3.80667	3.37333	3.66333	3.92	3.7	3.53333	3.89667	3.60667	3.68	3.85	3.39	3.74333	3.68
236637_at	TAS2R14	Taste receptor, type 2, member 14	2.64	2.55667	2.78667	2.58	2.46	2.555	2.46	2.51	2.55667	2.49333	2.56333	2.49	2.685	2.51	2.64333	2.71333	2.51333	2.62	2.57	2.48667	2.46	2.53	2.52	2.53333	2.58	2.69	2.83	2.56	2.52	2.59	2.45	2.53	2.51	2.54333	2.5	2.49	2.55667	2.40667	2.45	2.45	2.47	2.58667	2.54	2.42	2.44	2.50667	2.45667
206190_at	GPR17	G protein-coupled receptor 17	5.68333	5.61	4.78	6.15	4.71	5.22	5.63667	5.555	5.15667	5.25	5.99	5.24	4.535	5.62667	5.76333	5.36667	5.36	5.82667	6.28333	5.48	4.465	5.105	5.87333	5.83333	5.78	3.98	4.48667	5.74667	3.92	5.95	4.08	6.46667	6.8	6.27	4.59667	4.94	3.30667	3.55	3.67	3.9	3.69	3.68333	3.74	3.67	3.52	3.59	3.67333
205272_s_at	PRH1 /// PRH2	proline-rich protein HaeIII subfamily 1 /// proline-rich protein HaeIII subfamily 2	5.83	5.95333	5.53667	6.05	6.01	5.97	5.51333	5.7125	6.00333	5.86667	5.42667	5.8	5.58	5.65	5.34	5.39	5.58	5.58333	5.46667	5.59333	6.06	6.065	5.73	5.48	5.52	5.7	5.31667	5.56	5.71	5.77333	6.16	5.47333	5.54333	5.31333	5.48333	6.37333	5.56	5.95333	6.01	5.76	5.93333	6.38	6.27	5.72	5.56	5.69	5.50667
227684_at	DNMT1	DNA (cytosine-5-)-methyltransferase 1	6.48333	6.28333	6.63	6.85	6.69	6.275	6.26333	6.565	6.5	6.45667	6.43	6.46	6.25	6.38333	5.95	6.07	6.14	6.36	6.11667	6.56	6.715	6.64	6.47667	5.99333	6.29333	6.36	6.19333	6.18333	6.97	6.27	6.3	6.1	6.22333	5.88333	6.11	6.29	6.04333	6.60667	6.85	6.54	6.85333	6.71667	7.05	6.93	6.655	6.38333	6.57667
244618_at	GPR61	G protein-coupled receptor 61	4.61667	4.77	5.05667	4.79	5.17	4.915	4.88	4.77	4.96	5.23	4.8	4.59	4.72	4.91667	4.48667	4.65333	4.79	4.81	4.59667	4.84667	5.36	5.265	4.59333	4.86	4.66667	4.62	4.57667	4.61	4.79	4.68	4.85	4.52	4.92333	4.66667	4.51333	4.58	4.63333	4.91667	4.73	4.73	5.01	4.62	5.08	4.78	4.695	4.81667	4.96
209867_s_at	LPHN3	latrophilin 3	8.56	8.48667	7.98	8.44	8.035	7.825	8.27	8.1275	8.31667	8.13	7.94667	8.62	7.85	7.78333	7.99333	8.36333	8.62667	7.85333	8.23667	7.81	7.845	7.955	8.15667	8.03	8.35667	7.68	8.05333	8.36	7.16	8.08333	7.9	8.13	6.97	8.04667	7.61	7.63333	6.72	6.27667	6.04	5.69	5.67667	9.31	6.69	6.35	6.79	5.49667	5.88667
206983_at	CCR6	chemokine (C-C motif) receptor 6	3.54667	3.41667	3.21667	3.35	2.96	3.215	3.11	3.5075	3.35667	3.08333	3.13667	3.18	3.075	3.39333	3.14	3.22	3.14667	3.45333	3.27333	3.39667	3.34	3.195	3.24333	3.05	3.25333	3.71	3.26	3.15333	3.6	3.19333	3.63	3.07	3.42667	3.10333	3.07333	3.10667	3.25333	3.04667	3.29	3.18667	3.27667	3.22333	3.6	3.49	4.055	3.06	3.63
207578_s_at	HTR4	5-hydroxytryptamine (serotonin) receptor 4	7.09333	7.04	7.82333	7.51	8.1	7.95	7.19667	7.2875	7.81333	7.84	7.23667	6.88	7.325	7.22667	6.87333	7.17667	7.01333	7.03	7.10333	6.92667	7.685	8.13	7.00667	7.17667	6.92667	7.23	7.02667	6.81	7.45	7.04	7.13	7.03333	7.07333	7.34	6.88667	6.85	7.51333	7.54	7.24	7.36667	7.17333	7.18667	7.89	7.21	7	7.2	7.75667
225058_at	GPR108	G protein-coupled receptor 108	6.79667	6.76667	6.95333	7.32	7.535	7.505	6.80333	6.905	7.09	7.3	7.06333	6.82	6.55	6.82333	6.93667	6.84333	6.44667	6.79667	7.05333	6.93667	7.26	6.95	6.86333	7.00333	6.83333	6.65	6.55	6.80333	6.76	7.1	6.99	7.11667	7.18	6.87	7.24	7.25667	7.16	7.25667	6.99	6.91667	6.78333	6.95333	7.05	7.02	7.515	7.44	7.41333
239630_at	TAS2R14	Taste receptor, type 2, member 14	4.26333	4.41	4.06	4.64	3.91	4.245	4.52	4.5425	4.07333	4.10333	4.87	3.77	3.705	4.32	5.11	4.22667	4.46667	4.94333	4.46333	4.57	3.76	3.9	4.58667	4.71	4.3	4.28	4.93333	4.97667	4.02	4.56	3.72	4.94	4.81333	4.42	4.26333	4.84	3.85667	4.29	4.09	4.60667	4.96333	3.65333	3.94	3.81	4.38	4.14667	3.79
210234_at	GRM4	glutamate receptor, metabotropic 4	6.96	6.50333	7.43	6.56	7.115	7.04	6.53	7.275	6.86	6.78	6.31333	6.54	6.595	6.71	6.36333	6.63333	6.42667	6.49667	6.67333	6.67333	7.34	7.145	6.50333	6.30667	6.45667	7.62	8.74333	6.34	7.47	6.72333	7.26	6.25333	6.42333	6.27667	6.53667	6.32	6.62667	6.82333	6.79	6.26333	6.60667	6.44	7.19	6.52	6.54	6.38333	6.71667
231788_at	GPR92	G protein-coupled receptor 92	4.34	4.33	4.37667	4.14	4.295	4.4	4.61333	4.3025	4.26667	4.37667	5.03	4.16	4.175	4.39	4.39	4.36	4.21667	4.26	4.43	4.17667	4.5	4.075	4.62	4.37333	4.45667	4.5	4.21667	4.09667	4.28	4.23333	4.68	4.7	4.73333	4.40667	4.29667	4.16667	4.15667	4.31	4.43	4.09667	4.50667	4.10333	4.4	4.44	4.54	4.20667	4.70667
64942_at	GPR153	G protein-coupled receptor 153	7.70667	8.29	8.18333	8	8.05	8.05	7.72667	7.855	8.04333	8	7.78333	7.79	7.975	7.95333	7.62333	7.93667	8.02333	8.03	8.2	8.81333	8.76	8.44	7.72333	7.68333	7.83333	8.05	7.85667	7.65667	7.89	7.89333	7.65	7.56667	7.69333	7.72667	7.70667	7.84333	7.55667	8.04	7.65	7.72333	7.70667	7.68667	7.86	7.83	7.765	8.09667	8.28333
1567056_at	OR8G2	olfactory receptor, family 8, subfamily G, member 2	3.39	3.5	3.55	3.52	3.255	3.45	3.31	3.51	3.42333	3.35	3.27333	3.21	3.35	3.42	3.12667	3.12	3.31333	3.39667	3.26	3.58	3.46	3.27	3.36	3.36333	3.24667	3.64	3.42	3.25667	3.73	3.31	3.22	3.28333	3.39333	3.18333	3.26667	3.21	3.34667	3.25667	3.32	3.37667	3.52	3.44333	3.72	3.4	3.265	3.30667	3.19
217081_at	OR2H2	olfactory receptor, family 2, subfamily H, member 2	4.55667	4.48333	4.34333	4.67	4.325	4.47	4.19	4.4825	4.28	4.27667	4.20333	4.03	4.175	4.41667	3.70667	3.95667	4.21667	4.64	4.04333	4.58667	4.485	4.45	4.27	3.95667	4.22333	4.47	4.08	4.05333	4.83	4.16	4.61	3.93667	4.2	3.76	3.85	3.90667	3.96667	4.13333	5.19	4.31333	4.48667	4.32667	5.21	4.68	4.295	3.95667	4.16333
243798_at	BLR1	Burkitt lymphoma receptor 1, GTP binding protein (chemokine (C-X-C motif) receptor 5)	3.95333	3.90667	4.22	4.17	4.2	4.185	4.11667	4.05	4.19333	4.06667	4.14667	4.19	4.155	4.12333	3.96	4.13667	4.08	4.01	4.06	4.05667	3.865	4.185	3.92	4.02333	3.95	4.11	4.15	3.9	4.07	4.20667	4.1	4.02667	4.24667	4.15	3.95667	4.03667	4.62	4.49333	4.44	4.05	4.24333	4.78667	4.37	4.22	4.345	4.41667	4.55333
243107_at	CCR7	Chemokine (C-C motif) receptor 7	4.32	4.75667	4.26	4.4	4.425	4.375	4.38667	4.52	4.26	4.36	4.54333	4.56	4.58	4.62667	4.16333	4.43667	4.47	4.44333	4.42333	4.61333	4.26	4.43	4.39	4.44333	4.28	4.69	4.52667	4.31	4.61	4.32	4.61	4.17667	4.57	4.48333	4.44333	4.28667	4.73	4.93667	4.61	4.41	4.51667	4.69	5.01	4.75	4.745	4.72333	5.14667
1552991_at	OR5P2	olfactory receptor, family 5, subfamily P, member 2	4.35	4.32	3.87667	3.98	4.005	3.82	4.33333	4.175	3.84	3.98	4.27333	3.66	4.155	4.29	3.90333	3.87333	4.29	4.47667	3.98667	4.09333	3.5	4.01	4.15333	4.39333	4.11	3.82	4.35667	3.84667	4.59	4.02	3.93	3.97333	4.38333	4.36333	4.23667	3.92667	4.02667	4.41	4.36	4.22	4.17667	4.18333	4.31	3.81	4.095	4.19	3.97333
234042_at	TAS2R45	taste receptor, type 2, member 45	5.49	5.26333	5.44	5.17	5.32	5.105	5.74667	5.25	4.82	5.09667	5.41333	4.9	5.2	5.51667	5.40333	5.4	5.89333	5.48333	5.18333	5.32333	5.205	5.695	5.43667	5.43667	5.30667	5.28	5.65	5.21333	5.22	5.23	5.07	5.25	5.49667	5.37667	5.24667	5.01333	4.98667	5.41	5.63	5.36333	5.55	5.12	5.62	5.04	5.145	5.25667	5.22333
221460_at	OR2C1	olfactory receptor, family 2, subfamily C, member 1	5.61333	5.85333	5.84667	6.16	6.165	5.99	5.83	5.9575	5.74667	5.65333	5.95333	5.77	5.855	6	5.68667	5.83	5.99	5.96667	5.81	5.82667	5.55	5.995	5.66667	6.02667	5.78	6	5.96667	5.6	5.93	5.71667	5.84	5.87333	5.89	5.91667	5.69	5.93333	6.04333	6.36	5.92	5.96	6.02	5.94	6.09	6.11	5.835	6.06667	5.75
230907_at	GPRC5C	G protein-coupled receptor, family C, group 5, member C	5.41	5.49667	5.57667	5.46	5.52	5.51	5.33	5.4675	5.59667	5.72667	5.33	5.03	5.49	5.42	5.11333	5.36	5.24	5.23333	5.21667	5.32	5.72	5.74	5.47	5.21667	5.19	5.5	5.36667	5.22	5.81	5.25667	5.44	5.26333	5.51	5.24	5.15	5.17	5.44333	5.53	5.81	5.37	5.63667	5.37667	6.09	5.44	5.23	5.25	5.55333
1569542_at	GPR125	G protein-coupled receptor 125	3.52667	3.66333	3.3	3.44	3.49	3.31	3.55	3.5125	3.54667	3.60667	3.7	3.18	3.25	3.44	3.45667	3.32333	3.55333	3.50667	3.49	3.69333	3.455	3.105	3.51667	3.45333	3.67	3.32	3.35	3.45333	3.17	3.68333	3.39	3.49333	3.95667	3.77333	3.51667	3.63667	3.53667	3.56	3.55	3.92333	3.87	3.61333	3.11	3.33	3.685	3.41667	3.26667
210961_s_at	ADRA1D	adrenergic, alpha-1D-, receptor	3.69	3.91	4.47	3.89	4.735	4.38	3.59333	3.9475	4.29333	4.70667	3.80667	4.02	3.9	3.99667	3.72	3.97333	3.75333	4.24667	3.71667	4.30333	5.295	4.88	3.71667	3.61333	3.72	3.68	3.42333	3.82333	3.99	3.77	4.2	3.60333	3.62667	3.69667	3.61667	3.53	4.62333	3.88667	4.12	3.70333	4.00667	3.81	4.3	4.06	3.555	3.65	4.37
1567054_at	OR1C1	olfactory receptor, family 1, subfamily C, member 1	3.67	3.87667	3.58	3.63	3.545	3.58	3.75333	3.85	3.47333	3.75333	3.47667	3.49	3.565	3.64667	3.45	3.52333	3.55	3.68	3.58333	3.70333	3.475	3.435	3.62333	3.51	3.59333	3.64	3.59333	3.5	3.88	3.62	3.61	3.61	3.67667	3.49	3.42667	3.71667	3.56	3.69667	3.81	3.53667	3.88	3.67667	4.29	3.79	3.465	3.57	3.89667
205891_at	ADORA2B	adenosine A2b receptor	5.61667	5.78	4.69333	5.55	4.71	4.645	4.9	5.0375	4.54333	4.26667	4.44333	5.82	4.99	5.05667	5.10667	5.25	5.75	5.88	4.97333	4.51667	4.735	4.835	4.46333	4.66333	4.73	4.59	5.06667	5.35333	4.99	4.46333	4.95	4.46333	4.54333	4.40667	4.63667	5.91333	4.22	4.49333	5.11	4.55	4.86667	4.13333	4.61	4.47	5.415	4.22667	4.68333
239221_at	GPR123	G protein-coupled receptor 123	4.64667	5.85	4.94333	4.83	5.77	5.865	5.39667	4.66	5.83333	5.84667	4.94333	6.44	5.735	6.12667	6.07	6.7	5.85	5.79	6.15	7.09667	7.185	6.455	5.25667	5.12667	5.62333	4.56	4.48667	6.29333	4.67	5.65667	5.25	5.4	4.69333	5.76667	4.05667	4.03	4.39333	4.52667	4.7	4.28	4.4	4.44	5.05	4.06	3.985	4.39333	4.61667
234108_at	TAS2R45	taste receptor, type 2, member 45	3.36	3.42	3.13667	3.58	3.265	3.325	3.22	3.455	3.09667	3.38333	3.16	3.29	3.18	3.32667	3.08	3.19333	3.15	3.32333	3.09333	3.2	3.215	3.12	3.17333	2.99	3.08333	3.58	3.26333	3.23	3.57	3.24333	3.37	3.08667	3.26333	3.09333	3.11	3.11	3.06	3.12667	3.59	3.21333	3.33667	3.26667	3.75	3.15	3.27	3.22667	3.21333
216098_s_at	HTR7 /// HTR7P	5-hydroxytryptamine (serotonin) receptor 7 (adenylate cyclase-coupled) /// 5-hydroxytryptamine (serotonin) receptor 7 pseudogene	2.99667	3.13667	2.96333	2.78	3.15	3.115	3.14	3.295	3.02333	3.11667	3.07333	3.02	3.275	3.13333	2.89333	3.12667	3.15333	2.86667	3.07	3.09333	3.125	3.415	3.10333	3.09333	3.12333	3.15	2.82333	2.87333	3.42	3.08667	3.05	3.01333	3	3.02	3.12	3	3.09667	3.38	3.18	3.1	3.35667	3.17333	3.72	3.15	3.37	3.10333	3.47667
234303_s_at	GPR85	G protein-coupled receptor 85	5.99	5.12333	5.98667	4.35	6.06	5.69	5.39333	5.63	6.18333	6	4.75	5.66	5.52	5.02	5.63333	5.68	5.67	5.71	5.21667	5.59333	7.125	6.335	5.07333	4.92	5.41	5.55	5.73333	5.64	6.09	5.29667	4.93	5.13	3.81	4.56	3.89667	4.63333	3.39	3.54333	3.53	3.74333	3.41667	3.35333	3.64	3.3	3.485	3.53667	3.41
232350_x_at	GPR161	G protein-coupled receptor 161	5.09	5.40667	4.95333	5.33	4.595	4.55	5.82	5.3525	6.03333	5.34333	5.1	5.26	4.93	5.61333	5.41333	5.41333	5.37	5.77667	5.55	5.65667	4.96	4.945	5.41667	5.46333	5.3	6.13	5.44	5.23333	5.43	5.53333	5.25	5.34	5.59667	5.18	5.92333	5.9	5.53667	5.25333	5.32	5.14	5.34	5.77667	5	5.52	5.405	4.76333	4.94333
227727_at	MRGPRF	MAS-related GPR, member F	4.3	4.69667	4.84667	4.51	4.79	4.97	4.82333	4.7025	5.34	4.91	5.25333	4.97	4.85	5.4	4.91667	5.00333	4.56333	4.73333	5.2	4.53667	4.87	4.435	4.94333	5.26	4.74667	6.57	6.28	4.58667	6.31	5.21333	5.43	5.12	4.94333	5.12	6.46667	6.38333	8.85667	7.54	5.5	6.00667	5.22333	9.64333	8.04	8.62	7.755	7.66333	7.86667
225511_at	GPRC5B	G protein-coupled receptor, family C, group 5, member B	8.81333	8.55333	8.73667	9.86	9.81	9.48	9.14333	8.3725	9.06	9.19	9.48333	8.96	8.86	8.58667	8.94	8.52667	8.87	8.91333	9.26	8.96333	8.37	8.755	9.45333	9.29	9.40667	8.19	8.80667	8.89667	7.9	9.06	9.16	8.99	9.99333	9.67	6.61333	7.53	6.06333	6.15333	6.84	6.78	6.96667	6.09667	6.13	6.11	5.85	6.64667	6.03333
234469_at	OR51B4	olfactory receptor, family 51, subfamily B, member 4	4.89	5.15	4.54333	4.49	4.365	4.45	5.20333	4.9375	4.35	4.07667	4.84667	4.8	4.68	4.92	4.65	4.48667	5.07333	5.21667	4.61	5.28667	4.61	4.26	4.71333	5.07333	4.96333	4.56	4.87	4.69667	5.01	4.85667	4.88	4.68	4.64667	4.74	4.86333	4.62333	4.36667	4.67667	5.09	5.03333	5.49333	5.02667	5.22	4.59	4.8	5.01	4.43667
212491_s_at	DNAJC8	DnaJ (Hsp40) homolog, subfamily C, member 8	6.91	6.94	7.57333	7.02	7.445	7.745	7.01333	7.0525	8.00333	7.66	6.97667	7.31	7.235	7.23	7.16667	7.23	6.82	6.92	7.38667	7.04	7.45	7.49	7.16	6.89	7.20333	7.18	7.04333	7.15	7.38	7.18333	7.13	7.18	7.10333	7.12667	7.04667	7.07	7.41	7.1	6.22	6.59667	6.28	7.51	6.93	7.29	6.975	6.9	7.04
1565737_at	SCTR	secretin receptor	4.37	4.15667	3.88	4.09	4.055	3.86	3.99	4.15	3.78667	4.03667	3.93	4.03	4.055	3.92	3.77	3.83333	4.12667	4.04667	3.78333	3.96	3.995	4.585	3.95	3.92	3.97333	4.02	4.02667	3.84	4.25	3.82333	4.05	3.83333	4.13	3.83333	3.86667	3.93333	3.61667	4.09667	4.13	4.07333	4.29667	4.00667	4.15	4.02	3.955	3.85667	3.83667
1552775_at	GPRC6A	G protein-coupled receptor, family C, group 6, member A	5.44	5.82667	6.04667	5.53	5.945	6.275	5.51667	5.47	5.76667	5.78	5.67333	5.37	5.555	5.56333	5.33667	5.44667	5.64333	5.44667	5.31	5.53667	5.855	5.995	5.31667	5.80333	5.58	5.54	5.56333	5.22	5.81	5.53667	5.32	5.32	5.50333	5.72667	5.34667	5.41	5.72	5.86667	5.63	5.45	5.52667	5.56667	5.77	5.15	5.27	5.57667	5.56
206812_at	ADRB3	adrenergic, beta-3-, receptor	5.42333	5.31	5.06667	5.61	5.035	5.175	5.17333	5.205	4.98333	5.24667	5.05333	5.15	5.01	5.24	4.95	4.84667	5.37	5.32667	4.9	5.41	5.175	5.23	5.15	5.20667	5.20333	5.48	4.89333	4.94	5.12	5.22	4.97	5.21333	5.17667	5.07333	5.22	5.03667	4.97667	5.30333	5.44	5.2	5.18333	5.43667	5.46	5.2	5.005	5.40667	5.11333
214558_at	GPR12	G protein-coupled receptor 12	6.02667	5.5	6.14333	5.87	6.295	6.13	5.96333	5.915	5.68333	6.03667	5.70333	5.56	5.955	5.58667	5.33333	5.60667	5.67	5.82667	5.45667	5.92	6.845	6.355	5.65	5.91333	5.76667	5.39	5.50333	5.34333	5.96	5.43667	5.21	5.42667	5.55667	5.32	5.2	5.00667	5.29333	5.66	6.33	5.42	5.87333	5.05333	5.62	5.28	5.11	5.42667	5.48667
207008_at	IL8RB	interleukin 8 receptor, beta	3.35	3.50667	3.37667	3.61	3.23	3.395	3.21333	3.25	3.42	3.42667	3.18	3.62	3.08	3.28333	3.11333	3.03667	3.08333	3.35	3.27667	3.31	3.595	3.385	3.28333	3.16	3.13	3.15	3.10333	3.09333	3.58	3.28333	3.38	3.22	3.43	3.08	3.13333	3.14667	3.32333	3.28333	3.84	3.48667	3.77333	3.32	3.59	3.46	3.8	3.48333	3.26333
211384_s_at	CASR	calcium-sensing receptor (hypocalciuric hypercalcemia 1, severe neonatal hyperparathyroidism)	4.16333	4.05	4.43	4.51	4.445	4.435	4.12	4.33	4.09	4.17667	4.15333	3.9	4.02	4.22333	3.92333	4.02	4.1	4.16333	4.03667	4.33667	4.24	4.385	4.09	4.08667	4.16333	4.43	4.18	3.94667	4.4	4.08333	4.38	3.98333	4.13333	3.88	3.98	4.04	4.29667	4.18333	4.88	4.16667	4.39	4.05667	4.54	4.22	4.12	4.05333	4.43667
221347_at	CHRM5	cholinergic receptor, muscarinic 5	4.67	4.69667	4.99	5.42	4.69	4.595	5.19333	4.7925	4.65667	5.09	4.79	4.82	4.705	4.68667	4.47	4.47667	4.81667	4.93	4.60667	4.76667	4.51	5.05	4.72	4.96	4.83333	4.29	4.67	4.88	4.56	4.63667	4.36	4.83	4.84667	4.62667	4.37	4.44	4.51	4.89	4.8	4.63667	4.99	4.63333	5.12	4.52	4.3	4.68667	4.67333
1570350_at	RUNX1	runt-related transcription factor 1 (acute myeloid leukemia 1; aml1 oncogene)	4.37667	4.43667	4.64	4.12	4.75	4.445	4.31667	4.24	4.20333	4.47	4.39	4.48	4.34	4.26333	4.11667	4.14	4.27667	4.21	4.11333	4.07	4.62	4.63	4.20667	4.36333	4.04333	4.46	4.15333	4.12	4.48	4.24667	4.11	4.25667	4.21	4.31667	4.39667	4.39667	4.26667	4.47333	4.15	4.12667	4.12667	4.34333	4.67	4.48	4.145	4.52667	4.64667
221343_at	OR11A1	olfactory receptor, family 11, subfamily A, member 1	3.38667	3.32333	3.69667	3.7	3.545	3.7	3.52333	3.5875	3.41333	3.57	3.64333	3.29	3.43	3.43333	3.24	3.3	3.42333	3.36667	3.31667	3.39333	3.585	3.605	3.41	3.59333	3.53333	3.58	3.23	3.3	4.07	3.40667	3.5	3.38333	3.40333	3.39	3.33667	3.23	3.29667	3.66667	3.56	3.27667	3.51	3.39	3.91	3.77	3.445	3.45333	3.68
207294_at	AGTR2	angiotensin II receptor, type 2	3.19333	3.18333	2.78333	2.9	3.19	3.065	3.02667	3.065	2.94333	2.88333	2.84333	2.78	2.93	3.01667	2.87333	2.93	2.83667	2.90667	2.62	2.80333	2.9	2.825	2.96333	2.84	2.93	3.04	3.03	2.83333	2.93	2.81667	3	2.89	3.09333	3.00667	2.77667	2.96	2.82	2.90333	3.2	3.18333	3.00333	3.05333	2.74	3.26	2.89	2.78667	2.80333
1564439_a_at	C11orf36	chromosome 11 open reading frame 36	6.01333	5.93	6.03333	6.18	6.155	5.885	6.16333	6.095	5.81	6.01333	6.21	6.36	6.595	6.15333	5.92	6.00333	6.23333	6.00667	6.2	5.91667	5.805	6.015	6.05667	6.25333	5.98333	6.69	6.37333	6.06	6.69	5.97333	6.58	6.17	6.39333	5.96667	5.93667	6.06333	6.61667	6.54333	6.24	5.91667	5.94	6.25667	6.62	6.14	6.1	6.14333	6.35
207554_x_at	TBXA2R	thromboxane A2 receptor	6.23667	6.26667	6.4	6.02	6.575	6.455	6.22	6.2325	6.37	6.53667	6.26667	6.11	6.37	6.30333	5.84667	6.29667	6.16667	5.90667	6.07	5.97	6.505	6.12	6.15667	6.16	6.13	6.48	6.02	5.92333	6.45	6.09	6.4	6.05667	6.3	6.28667	5.91333	6.08333	7.56667	6.96667	6.56	6.32333	6.69333	7.45	7.07	6.25	6.12	6.08	6.76333
207404_s_at	HTR1E	5-hydroxytryptamine (serotonin) receptor 1E	5.64333	5.59667	5.68667	4.88	4.72	5.005	5.12	5.605	4.61	4.65	4.83	6.22	6.04	5.75	5.29	5.85333	5.93333	5.31333	5.14667	5.05333	5.24	5.17	5.29333	5.29	5.59333	5.67	5.20667	5.7	5.83	5.44	5.62	5.31667	4.89	5.02667	5.03667	4.79	4.71667	5.25333	5.09	4.96	4.97	5.18	5.22	4.65	4.695	5.10333	5.07333
205946_at	VIPR2	vasoactive intestinal peptide receptor 2	6.79	6.91	7.08333	6.98	6.79	7.115	6.63667	6.945	7.03333	7.08	6.82333	6.86	6.505	6.75333	6.71333	6.60667	6.5	6.71333	6.70667	6.69	7.145	7.025	6.58	6.53333	6.47667	6.6	6.28333	6.54	7.01	6.65	6.81	6.48333	6.49333	6.73	6.42333	6.19	7.35	7.34667	7.19	6.96	7.25	6.81667	7.17	6.83	6.57	7.07667	6.59333
210833_at	PTGER3	prostaglandin E receptor 3 (subtype EP3)	2.52	2.54667	2.55	2.75	2.59	2.575	2.52	2.505	2.50333	2.65333	2.47333	2.61	2.43	2.60667	2.47	2.39333	2.46333	2.51333	2.56333	2.41333	2.71	2.52	2.52	2.41333	2.65	2.47	2.47333	2.53	2.53	2.53	2.57	2.44333	2.53	2.44667	2.77	2.60667	2.88333	2.61667	2.41	2.46333	2.48667	2.56333	2.57	2.76	2.96	3.22333	3.00667
208573_s_at	OR2H2	olfactory receptor, family 2, subfamily H, member 2	5.00667	5.34	4.85	5.13	5.045	4.83	4.96	5.185	4.66333	4.86	5.15667	5.46	4.835	5.35667	4.59	4.67	5.01333	5.35	4.95	5.24667	4.85	4.81	5.06667	5.03667	4.93333	5.04	5.19	4.77	5.35	5.02	5.19	4.92667	5.20667	5.06333	4.86667	4.90667	4.89333	5.52667	5.43	4.65667	5.05667	4.91667	5.83	5.31	4.935	4.87333	5.32
211544_s_at	GHRHR	growth hormone releasing hormone receptor	4.37333	4.48667	4.67667	4.66	5.29	5.1	4.52	4.5775	4.71667	4.70667	4.64333	4.55	4.625	4.55333	4.47667	4.62667	4.6	4.62	4.42333	4.65667	4.785	5.015	4.59	4.57667	4.56333	4.33	4.58667	4.44333	4.91	4.52333	4.46	4.58667	4.52	4.46333	4.50333	4.45	4.49667	4.73667	4.51	4.67333	4.89	4.45333	4.7	4.26	4.435	4.65	4.39333
1553558_at	TAS2R41	taste receptor, type 2, member 41	4.36	4.85	4.56	4.58	4.445	4.525	4.66333	4.5425	4.23333	4.68	4.81333	4.65	4.9	4.60667	4.44667	4.57667	4.61333	4.51667	4.45333	4.46	4.355	4.56	4.52333	4.71333	4.46	4.6	4.53	4.47667	4.77	4.52333	4.49	4.5	4.59	4.70667	4.55	4.64667	4.60667	4.63333	4.74	4.45333	4.50333	4.63	4.73	4.31	4.51	4.62	4.74667
211175_at	GPR45	G protein-coupled receptor 45	4.89333	5.15333	4.91333	4.65	4.96	4.94	4.80667	4.985	5.05	5.19333	4.84667	5.07	4.89	5.24	4.76	4.89667	4.81333	4.79	4.93667	5.25	5.105	4.99	5	4.78	4.83667	5	4.94333	4.71667	5.45	5.01667	4.92	4.82	4.91	4.90333	4.66333	4.74667	4.92	4.90333	5.18	4.90333	5.20667	4.95333	5.17	5.12	4.91	4.86667	4.98
1562783_at	GPR133	G protein-coupled receptor 133	3.84333	3.87	4.27	4.02	4.065	4.645	3.86333	4.0275	4.12667	4.32	3.94667	3.88	3.985	4.07	3.68667	3.78	3.92333	3.73667	3.62667	3.75	4.165	4.415	3.72667	3.95	3.69667	4.11	3.95667	3.73	4.23	3.75667	3.7	3.78	3.95	3.80667	3.76333	3.81333	3.99667	4.19333	3.65	3.75333	4.19	3.80333	4.24	3.64	3.785	3.98667	3.98333
208210_at	MAS1	MAS1 oncogene	5.08667	4.99333	4.52	4.83	5.185	5.205	5.42	4.9225	4.63333	5.34333	5.23	4.91	5.115	5.06	4.67333	4.95333	5.36333	5.15333	4.83	5.34667	5.33	5.3	5.15	5.36667	5.17	4.73	4.94667	4.72	5.31	5.11667	4.88	5.09333	5.17667	5.13	5.11	5.01667	4.78333	5.36	5.01	5.21	5.47	4.93667	5.65	5.47	4.835	5.26667	5.39
221466_at	P2RY4	pyrimidinergic receptor P2Y, G-protein coupled, 4	4.49	4.55	4.86333	4.55	4.95	4.83	4.58333	4.5925	5.17333	4.82333	4.86	4.69	4.935	4.73	4.49667	4.80667	4.64333	4.48	4.71667	4.53333	5.23	4.68	4.54667	4.89	4.39333	4.46	4.61333	4.47667	4.87	4.39333	4.83	4.65	4.46	4.91	4.68333	4.49	5.07	5.29	4.94	4.82667	5.04667	4.94667	4.48	4.87	4.575	5	5.51667
235988_at	GPR110	G protein-coupled receptor 110	4.65667	4.62667	4.64	4.58	4.565	4.57	4.76667	4.685	4.45667	4.49667	4.54333	4.31	4.52	4.57333	4.26667	4.49333	4.49	4.74	4.58333	4.70667	4.315	4.745	4.58333	4.69333	4.57667	4.41	4.83333	4.30667	4.83	4.42	4.63	4.48667	4.53	4.64667	4.48667	4.43667	4.60333	4.66667	4.66	4.55	4.63	4.61333	4.89	4.72	4.545	4.76333	4.48667
1568914_at	OPN5	opsin 5	3.98	3.98	4.17667	3.81	4.505	4.395	3.97	3.945	3.82333	4.25	3.92	3.64	3.925	4.16	3.80667	3.98333	4.13333	4.13	3.81667	3.98667	4.58	4.315	3.94667	3.98333	3.95333	3.88	3.99667	3.73333	4.01	3.77	3.77	3.89	3.81	4.07	3.82667	3.77667	3.85	4.19333	4.25	4.1	4.13667	4.03667	4	4.02	3.9	4.05667	4.29333
206960_at	GPR23	G protein-coupled receptor 23	3.04333	3.14333	3.33333	3.09	3.095	3.05	2.92	3.01	3.05667	3.3	3.15333	2.8	3.02	3.06333	3.21	2.95333	3	3.08333	2.98333	3.04	3.32	2.94	2.89667	3.13667	2.92667	2.82	3.07333	3.36333	3.05	3.03667	2.9	3.20667	3.92333	3.41333	3.00667	2.91667	2.95333	3.04	2.94	3.06333	3.2	3.08333	3.11	3.01	2.945	3.28667	3.02
221412_at	VN1R1	vomeronasal 1 receptor 1	4.53333	4.47333	3.93667	4.49	4.295	4.245	4.10333	4.245	4.22	4.22667	4.15	3.92	4.215	4.36	4.20667	4.22	4.46333	4.01	4.28333	4.21667	4.065	4.245	4.12	4.27667	4.13333	4.3	4.91667	4.41667	4.27	4.05667	4.07	4.16333	4.13333	4.23667	4.06667	3.86333	3.95	4.04	4.08	4.29667	4.36333	4.10333	4.28	3.95	3.97	3.99667	4.05667
214555_at	SSTR5	somatostatin receptor 5	4.03667	4.01667	4.28667	4.35	4.04	3.995	3.88333	4.1825	4.29667	4.16667	3.90333	4.17	4.12	4.30667	3.74	3.93333	3.9	3.91	3.85	3.96667	4.005	4.325	4.11667	3.85667	3.79667	4.76	3.96333	3.91	4.59	4.12	4.13	3.91333	3.91667	3.66333	3.89	3.85	4.32667	4.00333	4.22	3.99333	4.09	4.42	4.8	4.15	4.115	3.94	4.11667
206001_at	NPY	neuropeptide Y	9.61333	8.82333	8.80333	5.63	8.07	7.59	5.62	9.5825	6.03333	5.63667	5.28667	7.91	8.455	8.85	8.65333	8.30667	8.48667	8.09667	5.41	5.58	5.405	5.985	5.47	5.30333	5.50667	5.28	5.26333	9.23	5.58	6.76333	5.66	5.16	5.97333	5.75	5.03333	5.18333	5.38333	6.45	5.82	5.33	5.80667	5.47333	5.92	5.91	5.12	5.18333	5.56667
221393_at	TAAR3	trace amine associated receptor 3	4.08	4.29667	3.77667	4.12	4.18	3.92	4.71333	4.205	3.77667	4.00667	4.44667	4.02	4.575	4.24667	3.95333	3.74	4.38667	4.33667	3.88333	4.31667	4.125	3.955	4.20333	4.49667	4.53333	4.43	4.04	3.94667	4.38	4.10667	4.42	4.28	4.27667	4.21667	4.27	4.14333	4.03	4.44667	4.5	4.59	4.55667	4.22	4.76	3.96	3.95	4.37	4.40333
234766_at	OR8D2	olfactory receptor, family 8, subfamily D, member 2	5.48333	5.37667	5.26333	5.23	5	5.125	5.39667	5.3025	4.97333	5.15	5.16667	4.99	5.44	5.39333	5.05	5.04	5.38667	5.34333	5.20333	5.6	5.39	4.815	5.44333	5.20667	5.36	5.42	5.39	4.98	5.84	5.26333	5.49	5.03	5.48333	5.42333	5.07667	5.15667	5.12667	5.18	5.7	5.05	5.22333	5.17667	5.71	4.99	5.255	5.33333	5.20667
234840_s_at	OR5V1	olfactory receptor, family 5, subfamily V, member 1	3.94	3.87	3.65667	3.79	3.93	3.655	4.15667	3.9375	3.66667	3.90667	3.94667	3.8	3.52	3.92667	3.57667	3.69667	4.04667	4.08333	3.61	3.79	3.715	3.715	4.03	4.11667	3.9	3.88	3.87667	3.63667	4.42	3.65667	3.43	3.79667	3.96333	4.07333	3.91333	3.73	3.9	4.30667	3.95	4.07333	4.41667	3.87	4.46	3.8	3.79	3.87333	3.71333
201697_s_at	DNMT1	DNA (cytosine-5-)-methyltransferase 1	5.80667	5.70667	5.78667	6.46	6.51	6.395	5.91667	5.6325	6	6.1	6.36	6.37	5.95	6.16	6.64	6.40333	5.98667	5.79667	6.69333	5.94333	6.24	6.47	6.13333	6.02667	5.96667	6.98	7.39667	6.43333	7.42	6.38333	6.11	6.38	6.24	6.24333	6.34	6.34667	6.18667	5.55667	4.93	5.65	5.48333	6.02	5.91	6.3	7.185	6.06	6.27
239607_at	GPR156	G protein-coupled receptor 156	6.84333	6.55	6.76667	6.61	6.82	6.51	6.57	6.7675	6.77667	6.67667	6.75667	6.71	6.92	6.80667	6.46667	6.53667	6.65	6.71667	6.58333	6.73	7.565	7.315	6.63	6.65333	6.62	6.67	6.57667	6.48	7.17	6.57667	6.66	6.57	6.62	6.50667	6.61	6.39	6.77	6.86	6.48	6.74667	7.04333	6.84333	6.86	6.85	6.67	6.68	6.99333
209630_s_at	FBXW2	F-box and WD-40 domain protein 2	6.61	6.42333	6.05	6.05	6.315	6.19	6.37	5.9525	5.92667	6.16667	6.61667	6.46	6.37	6.00333	6.89333	6.51667	6.51	6.21333	6.39667	6.3	6.125	6.02	6.56333	6.17667	6.41333	6.39	6.58667	6.84667	6.52	6.39333	6.01	6.70333	6.63	6.51667	7.30667	7.36333	7.62667	6.10667	6.51	7.17333	6.40667	7.4	6.51	7.13	7.895	7.36333	7.43333
206563_s_at	OPRL1	opiate receptor-like 1	5.00667	5.11667	5.25333	5.04	5.305	5.165	4.78333	5.2325	4.67333	5.13333	5.07667	5.35	5.145	5.16667	4.99667	5.02	5.25	4.93333	4.88	4.88333	5.135	4.86	4.85667	4.94667	5.04333	5.36	4.95333	5.04333	5.28	5.23333	5.36	4.93667	4.89667	4.9	4.78	4.92333	5.37333	5.25667	5.19	4.88	5.02333	5.23333	6.04	5.36	5.035	5.12	5.34667
214467_at	GPR65	G protein-coupled receptor 65	3.04	3.2	3.13	3.22	3.08	3.415	3.23333	3.1075	3.21	3.29333	3.54667	2.81	3.1	3.06667	3.00667	2.99667	3.03667	3.21333	2.99333	3.26333	3.095	3.23	3.34333	3.52	3.06667	3.16	3.16	2.97333	3.13	3.1	3.01	3.33667	3.4	3.23	3.72	3.64	3.01333	3.29667	3.2	3.24	3.21	3.23333	3.33	3.21	3.48	3.6	3.76667
1567238_at	OR2L2	olfactory receptor, family 2, subfamily L, member 2	2.93	3.19333	3.16	3.34	3.125	3.185	3.07667	3.3875	3.31667	3.12	3.02333	3.37	3.225	3.06	2.99333	3.06	2.95333	3.3	3.08333	3.06333	3.29	3.285	3.02333	3.03667	2.95333	3.23	3.26667	3.15667	3.26	2.99333	3.06	3.13	3.08667	2.99667	2.88	3.07333	3.12	3.28	3.55	2.98667	3.21667	3.07	3.26	3.26	3.025	3.17	3.25
220901_at	GPR157	G protein-coupled receptor 157	4.91333	4.62667	4.79333	4.64	4.66	4.815	4.39333	4.93	4.98333	4.82667	4.63	4.95	4.615	4.62667	4.49667	4.65	4.67	4.61667	4.64	4.78333	4.29	5.115	4.71333	4.66333	4.69667	5.18	4.65	4.50333	5.3	4.64667	5.07	4.50333	4.60333	4.52333	4.45	4.78333	4.68333	5.02333	5.27	4.93333	5.42	4.83	5.15	5.03	5.685	4.61333	4.83
1567060_at	OR8G1	olfactory receptor, family 8, subfamily G, member 1	4.42667	4.22667	4.24667	4.33	4.18	3.935	4.54	4.4575	4.18667	4.43	4.39667	4.13	4.355	4.22	4.17667	4.14667	4.47667	4.42	4.29333	4.31	4.595	4.57	4.18667	4.26	4.24667	4.25	4.20667	4.18667	4.62	4.11333	3.96	4.31667	4.25	4.15667	4.04333	4.02667	4.19	4.46333	4.27	4.1	4.43333	4.27	4.33	4.22	4.135	4.22	4.25
223620_at	GPR34	G protein-coupled receptor 34	5.47	5.97	4.55667	4.8	5.645	5.47	7.24667	5.1	4.96	5.27667	7.52	3.92	5.02	5.44	5.77333	5.46	5.74	5.76667	5.78333	5.45333	4.95	5.115	6.91333	7.03667	6.67667	3.82	4.77333	5.76333	4.38	6.32333	5.04	7.55333	6.89	7.19333	6.36333	6.04	4.59	4.86333	5.08	4.91667	4.62	4.97	4.08	5.8	5.415	6.27333	6.76667
241506_at	LPHN3	Latrophilin 3	4.25	4.61	4.12667	3.83	3.57	3.36	3.91333	4.235	3.41667	3.61667	4.01667	3.37	3.19	3.78	4.19667	4	4.48	3.79	3.81333	3.77333	3.02	3.285	4.04667	3.97333	3.95667	3.5	4.92333	4.23333	3.51	4.10667	3.08	3.86333	3.69333	3.89667	4.26	4.33	3.43333	3.21667	2.98	3.08667	3.02	6.11667	3.45	2.97	4.06	3.15333	2.88333
213579_s_at	EP300	E1A binding protein p300	6.42333	6.12333	5.41333	6.26	5.745	5.93	6.26	5.975	5.46333	5.3	6.39333	6.08	6.01	6.17667	6.79333	6.51333	6.36333	6.22	6.92	5.63667	5.295	5.305	6.21333	6.46333	6.07	6.71	7.43	6.79667	6.47	5.96667	5.9	6.50667	6.78667	6.49	6.77333	6.37667	6.33	5.22	5.6	6.46667	6.02667	6.24667	5.31	6.37	6.605	6.77667	6.04
207589_at	ADRA1B	adrenergic, alpha-1B-, receptor	3.53667	3.31667	4.09667	3.88	3.65	3.865	3.38667	3.47	3.77667	4.18333	3.33	3.71	4.01	3.49667	3.40333	3.79333	3.39667	3.57667	3.46	3.84	3.855	4.195	3.38667	3.3	3.42	3.58	3.17	3.48	3.57	3.38333	3.38	3.42667	3.38667	3.40667	3.31667	3.22333	3.58	3.51	3.52	3.44	3.53	3.52	3.89	3.44	3.265	3.47667	3.66667
33579_i_at	GALR3	galanin receptor 3	6.05333	5.88333	5.90667	5.97	5.71	6.01	6.08	5.9575	5.96333	5.89667	6.15667	5.89	6.5	6.05333	5.94667	6.08	6.03667	5.88	5.93	5.64667	5.97	5.905	5.83	5.99667	5.75667	6.09	5.94333	5.97667	6.35	5.92667	5.82	5.94667	5.99667	6.15333	6.11667	5.84667	6.36667	6.56333	6.09	5.93667	5.94667	5.82333	6.72	6.14	6.075	6.21667	6.71
224325_at	FZD8	frizzled homolog 8 (Drosophila) /// frizzled homolog 8 (Drosophila)	3.74667	4.01667	3.35667	3.48	3.23	3.46	3.32333	3.5	3.28	3.33333	3.38333	3.84	3.29	3.71	3.69667	3.63	3.76667	3.76	3.60667	4.36	4.65	3.61	3.38	3.35667	3.32333	3.33	3.30667	3.72667	3.54	3.47	3.28	3.45	3.73333	3.47333	4.81333	4.55	4.63333	3.93	3.81	4.07333	3.77667	4.04667	3.94	4.29	3.48	3.78667	3.46667
211479_s_at	HTR2C	5-hydroxytryptamine (serotonin) receptor 2C	6.62667	3.94333	5.64667	3.46	3.75	3.815	4.07333	6.08	3.62333	3.00333	2.94	3.23	3.44	3.23333	3.33333	3.26	3.62333	4.10667	4.19667	3.47	3.32	3.755	4.14333	3.50667	5.03667	3.86	3.07333	3.42333	3.36	3.94333	3.12	3.01667	3.36333	3.76	3.08333	3.01	2.88667	3.02	2.92	2.91333	2.98333	3.02	3.33	3.11	3	2.95667	3.04
221451_s_at	OR2W1	olfactory receptor, family 2, subfamily W, member 1 /// olfactory receptor, family 2, subfamily W, member 1	3.26	3.13667	3.00667	3.02	3.32	3.185	3.25333	3.1575	3.27333	3.10667	3.03	3.07	3.15	3.15667	3.01333	3.04667	3.11	3.36667	2.92	3.05	3.36	3.205	2.96333	3.13667	3.14667	2.99	3.23333	2.96	3.49	3.23667	3.01	2.96	3.12667	3.01333	3.06667	2.96667	3.24333	3.10333	3.2	3.19667	3.15	3.21	3.38	3.08	3.105	3.11667	3.31333
211679_x_at	GABBR2	gamma-aminobutyric acid (GABA) B receptor, 2 /// gamma-aminobutyric acid (GABA) B receptor, 2	6.31	8.35667	6	6.38	6.505	6.525	6.57	6.3875	7.63	7.04333	5.21667	8.72	8.265	8.41	7.92	8.57333	8.18667	7.48667	7.5	8.74	9.13	7.975	6.66	6.30333	7.14667	7.64	7.76667	8.08	8	6.93667	7.93	5.83667	5.36333	6.31333	6.53	6.51667	4.96333	5.08667	5.29	5.19	5.26667	5.04333	5.19	4.95	4.925	4.69333	5.18667
234450_at	PROKR2	prokineticin receptor 2	4.23667	3.84667	4.34333	4.15	4.165	4.38	4.23	4.11	4.49333	4.42667	4.28	4.66	4.52	4.11333	3.91667	4.23	4.04333	3.93	3.92667	3.94	4.18	4.635	3.95	4.29667	3.76333	3.96	4.22667	3.85333	4.16	3.95333	4.21	4.04667	4.06667	4.19333	3.98667	4.02	4.47667	4.47667	3.99	4.04333	4.13	4.18667	4.37	4	3.945	4.20667	4.53
213506_at	F2RL1	coagulation factor II (thrombin) receptor-like 1	3.2	3.11667	3.49	3.37	3.37	3.295	3.07333	2.9725	3.30667	3.37333	3.12333	2.54	2.985	3.25	2.97333	2.98667	3.03	3.12333	3.03333	3.06333	3.065	3.36	3.09667	3.10667	3.29333	3.6	2.77667	3.00667	2.82	3.23667	2.72	3.01667	3.66333	3.36667	3.08	3.02667	3.80333	3.11	3.21	3.53	3.21333	4.47333	3.58	3.54	5.015	3.08	2.90667
208379_x_at	NPY2R	neuropeptide Y receptor Y2	4.29	4.91667	4.61667	4.46	4.54	4.485	4.68	4.5675	4.36	4.38667	4.67667	4.36	4.795	4.54	4.35	4.40667	4.61	4.47667	4.42	4.61	4.875	4.395	4.61333	4.69333	4.36667	4.83	4.4	4.30333	4.26	4.29333	4.21	4.39	4.40667	4.70667	4.54667	4.35	4.63667	4.40667	4.65	4.48667	4.55333	4.57667	5.61	4.6	4.385	4.58667	4.71667
221294_at	GPR21	G protein-coupled receptor 21	6.66	6.46667	6.69333	6.73	6.725	6.505	6.53333	6.475	6.88333	6.73333	6.43333	6.54	6.895	6.49	6.29667	6.49	6.57	6.40333	6.23667	6.42333	6.775	6.95	6.28667	6.43333	6.45333	6.22	6.29667	6.27667	6.23	6.38667	6.18	6.23	6.27333	6.34333	6.17333	6.11	6.49333	6.76	6.53	6.20667	6.65	6.44667	6.55	6.4	6.245	6.32333	6.69333
1555661_at	OR8D1	olfactory receptor, family 8, subfamily D, member 1	4.64667	4.69333	5.08333	4.93	4.655	5.015	4.75333	4.9125	4.90333	4.76	4.67	4.73	5.2	4.8	4.59667	4.82667	4.79333	4.82333	4.45667	4.69	4.88	4.55	4.63	4.71667	4.66333	4.77	4.89333	4.43333	4.91	4.67667	4.99	4.57333	4.67333	4.64667	4.71667	4.71667	4.76	4.91667	4.56	4.57667	4.79333	4.73	4.91	4.49	4.905	4.91333	4.83
206582_s_at	GPR56	G protein-coupled receptor 56	6.96	7.10333	7.18667	6.71	7.095	7.25	6.78333	6.89	7.06667	7.33	7.04	7.07	6.46	6.80333	6.94	6.83667	7.14	6.82333	6.66	6.46667	7.25	7.125	6.5	6.83	6.36	6.6	6.54333	6.92667	6.86	6.49333	6.52	6.89	6.58	6.73667	6.94333	6.21333	6.75	6.60667	6.75	6.42333	6.54667	6.52333	6.89	6.44	6.845	6.52333	7.13667
1565738_at	SCTR	Secretin receptor	4.4	4.22333	4.40667	4.33	4.39	4.47	4.39667	4.3425	4.44	4.40667	4.39333	4.55	4.535	4.40667	4.21333	4.37	4.34	4.30333	4.37667	4.41	4.765	4.55	4.28	4.39667	4.22333	4.51	4.27333	4.35667	4.7	4.26667	4.3	4.29667	4.42667	4.39	4.50333	4.43667	4.60667	4.94	4.4	4.31667	4.34667	4.3	4.52	4.25	4.325	4.93	4.63667
210220_at	FZD2	frizzled homolog 2 (Drosophila)	4.85333	4.31	4.92333	4.28	4.865	4.58	4.27333	4.7975	4.75667	4.65333	4.81	3.99	4.23	4.76667	4.05	4.23333	4.05	4.22667	4.61333	4.26333	4.475	4.46	4.53333	4.56	4.22667	4.08	3.70333	4.22333	3.67	4.76667	4.13	4.57667	4.25	4.19667	8.44667	7.50333	7.28	6.43333	4.81	4.84333	4.56	6.93333	4.89	5.24	4.59	4.87	4.76333
229549_at	OPN1SW	Opsin 1 (cone pigments), short-wave-sensitive (color blindness, tritan)	6.35	5.85333	5.34333	5.75	5.6	5.25	5.66667	6.095	5.16667	5.18	5.66667	6.03	6.11	5.99	5.9	6.25	6.10667	5.91667	5.45667	5.76667	5.075	5.535	5.60667	5.75667	5.83667	5.99	5.87333	6.02667	5.94	5.76333	5.79	5.49667	5.76	5.82667	6.32333	6.30667	7.66333	6.5	6.54	6.60333	5.98667	8.29333	6.58	6.51	6.14	5.83333	6.65
1553326_at	RXFP2	relaxin/insulin-like family peptide receptor 2	3.28667	3.38667	3.13667	3.16	3.15	3.18	3.35667	3.285	3.10333	3.31	3.2	2.82	3.185	3.32	3.04667	3.00667	3.36333	3.26	3.02667	3.36333	3.165	3.235	3.16667	3.26	3.21667	3.22	3.45	3.01	3.32	3.16	3.17	3.17	3.31333	3.15	3.09	3.03	2.91667	3.26667	3.18	3.23	3.20667	3.01333	3.49	3.39	2.99	3.27	3.10333
243922_at	CASR	Calcium-sensing receptor (hypocalciuric hypercalcemia 1, severe neonatal hyperparathyroidism)	5.07333	5.08667	5.33667	5.17	5.06	5.025	5.48333	5.0375	4.87333	5.12	5.02667	4.48	4.8	5.01	4.69667	4.74333	5.08333	5.14333	4.91667	5.04333	5.28	5.225	4.75333	5.29333	4.86333	4.95	4.79667	4.58	5.13	4.72333	4.73	4.78667	5.16333	5.07	4.92667	4.71333	4.77667	5.39667	5.39	5.10667	5.34667	4.85667	5.35	4.34	4.84	5.26	5.21333
210730_s_at	NPY2R	neuropeptide Y receptor Y2	4.13667	4.34667	4.68667	4.38	4.235	4.3	4.38	4.4025	4.32667	4.34667	4.32667	4.28	4.62	4.32	4.43333	4.47	4.48667	4.35333	4.31333	4.17667	4.05	4.65	4.19333	4.48333	4.28	4.28	4.29333	4.38667	4.49	4.28333	4.23	4.37333	4.52	4.37	4.16667	4.15333	4.27333	4.47667	4.18	4.18333	4.53	4.34667	4.72	3.92	4.15	4.49	4.49333
234475_x_at	CCKBR	Cholecystokinin B receptor	4.60667	4.54	4.34	4.53	4.65	4.38	4.53333	4.62	4.29	4.43	4.48333	4.48	4.69	4.56	4.34667	4.41333	4.51333	4.62	4.37	4.49	4.16	4.285	4.49667	4.43667	4.45667	4.59	4.6	4.47667	4.84	4.49333	4.61	4.39333	4.62	4.38333	4.33667	4.41333	4.62	4.71667	4.5	4.31333	4.47	4.57	4.56	4.39	4.515	4.68667	4.66333
207293_s_at	AGTR2	angiotensin II receptor, type 2	3.71667	3.70333	3.63	3.64	3.625	3.81	3.89	3.61	3.72333	3.61333	3.79	3.49	3.675	3.82667	3.45333	3.45	3.77667	3.66333	3.63	3.54	3.455	3.51	3.59333	3.76	3.59667	3.69	3.59333	3.55	3.82	3.63667	3.72	3.52667	3.68333	3.78	3.66	3.59667	3.73667	3.87333	3.54	3.74667	3.75667	3.54333	3.95	3.56	3.78	3.61	4.02333
221663_x_at	HRH3	histamine receptor H3	7.48333	7.08333	7.34333	6.9	7.32	7.12	6.53333	7.595	7.28	6.89667	6.64333	6.75	6.62	6.86	6.68667	6.81667	6.69333	6.71	7.3	7.44667	7.715	7.18	6.65667	6.60667	6.72667	7.16	7.01333	6.64667	7.51	6.82333	6.88	6.62333	6.52	6.54667	6.48333	6.38333	6.63333	6.57	6.79	6.56333	6.82333	6.79	7.25	6.81	6.765	6.45	6.72333
1555447_at	GPR114	G protein-coupled receptor 114	5.16667	4.91333	5.5	5.02	5.455	5.28	5.17	5.1	5.17333	5.20333	5.25333	5.23	5.175	5.19	4.74	4.80667	4.94667	5.03333	4.97333	4.79333	5.37	5.375	4.98667	5.01333	4.79667	5.27	5.14	4.74333	5.63	4.92333	5.4	4.84333	4.86	5.02333	4.94333	4.99	5.17	5.39	5.48	5.26	5.12333	5	5.66	5.21	5.11	5.2	5.47667
336_at	TBXA2R	thromboxane A2 receptor	6.18667	6.42667	5.85	6.44	5.97	5.985	6.32667	6.11	5.64333	5.93667	6.51333	6.38	6.575	6.35667	6.06	6.17	6.39	6.21	6.35667	6.27333	5.93	6.065	6.23667	6.37	6.39333	6.11	6.2	6.16	6.42	6.38	5.99	6.22333	6.20667	6.28333	6.76	6.33667	8.48667	7.92667	6.74	6.58333	6.90333	8.41667	7.48	6.54	6.635	6.47333	6.77333
211201_at	FSHR	follicle stimulating hormone receptor	3.38333	3.47	3.47667	3.52	3.325	3.39	3.62	3.64	3.50667	3.62667	3.69667	3.42	3.855	3.76	3.42	3.5	3.64667	3.57	3.51333	3.53	3.365	3.215	3.43667	3.62667	3.54667	3.62	3.53	3.38667	3.52	3.48333	3.64	3.49333	3.49333	3.72	3.48333	3.67667	3.79333	3.88667	3.87	3.72333	4.02333	3.61667	3.66	3.75	3.59	3.65667	3.81
206899_at	NTSR2	neurotensin receptor 2	7.47	7.14333	7.63333	6.5	8.645	7.56	7.76333	7.065	7.85667	8.50333	7.30667	5.78	5.945	6.26667	5.97	5.91333	6.65333	6.56333	7.40333	6.33333	6.695	6.67	6.75333	7.07667	6.30667	4.68	4.98	6.37	4.81	5.61333	5.8	6.5	6.43667	6.16667	4.69333	4.54333	4.47333	4.83667	4.53	4.44333	5.01	4.27333	4.55	4.32	4.2	4.75	4.77667
215894_at	PTGDR	prostaglandin D2 receptor (DP)	2.91	2.96	3.65	3.17	3.26	3.11	2.92	3.03	3.07667	3.15	3.04667	3.09	3.04	3.1	2.88667	2.98667	2.90333	2.91667	2.98667	3.05	3.2	3.195	2.99667	3.08667	3.00333	3.09	2.96	2.96	3.08	3.36	2.87	2.93667	3.12667	2.94667	4.37	6.25667	3	3.26333	3.06	3.45	3.78	3.59333	3.83	3.42	3.355	3.64667	3.41667
233657_at	OPN5	opsin 5	4.87667	4.94667	4.91	4.79	4.96	4.775	5.05	4.945	4.75333	4.98	4.99333	4.83	5.23	4.96333	4.83667	4.85	5.1	4.91667	5.02667	4.88	5.14	4.825	4.91	5.11667	4.88667	4.75	4.83	4.83	5.18	4.75333	4.71	4.87333	4.94333	5.05333	4.79333	4.78333	5.07333	5.25333	5.1	4.9	5.29667	4.9	5.46	4.87	4.955	5.09333	5.23667
219951_s_at	C20orf12	chromosome 20 open reading frame 12	5.50667	5.32	5.65	4.44	5.19	5.05	4.92	5.31	5.07667	4.64	4.65333	5.1	4.65	5.05333	4.95667	5.35	5.29	5.23667	5.04333	5.56667	5.77	5.625	4.90333	4.81333	5.45	4.7	4.50667	4.90333	4.91	5.17333	4.7	4.68667	5.44	4.83	4.9	4.87	4.29667	4.35667	4.23	4.53333	4.71667	4.43333	4.89	4.52	4.885	4.91	4.87
211977_at	GPR107	G protein-coupled receptor 107	5.52	5.63667	5.77333	5.91	5.155	5.505	5.81333	5.495	5.83333	5.21667	5.84333	5.6	5.95	5.70667	5.86	5.54667	5.72667	5.75	5.96667	5.71667	5.475	5.615	5.52	5.93	5.95667	5.79	5.97333	5.77667	5.93	5.67667	5.37	5.80667	5.96	6.04667	6.34	6.09667	5.99667	6.20333	5.61	6.25333	5.80333	5.84	5.47	5.53	5.87	6.06667	6.38333
233717_x_at	SMO	Smoothened homolog (Drosophila)	3.69333	3.65	3.69333	3.77	3.7	3.76	3.45333	3.72	3.74667	3.76333	3.52667	3.54	3.495	3.43667	3.38667	3.53	3.42667	3.52333	3.5	3.67333	3.845	4.17	3.61	3.39	3.55667	3.97	3.62333	3.39667	3.61	3.66333	3.7	3.40667	3.69667	3.37667	3.41333	3.60667	3.49	3.33	3.56	3.47667	3.57333	3.42	3.59	3.51	3.765	3.09667	3.39
1553930_at	TAAR1	trace amine associated receptor 1	2.95333	2.99	2.87	2.91	3.035	3.005	3.03667	2.925	2.72333	2.96333	2.88	2.87	2.95	2.95333	2.79	2.85667	3.06	3.09333	2.85333	2.96667	2.935	3.09	2.91667	2.96333	2.94	2.83	2.94	2.87333	2.97	2.92	2.76	2.84333	2.95667	2.92667	2.83667	2.87	2.98	3.01333	2.91	2.89667	3.07333	2.92	3.52	2.93	2.895	2.96333	2.9
1559114_a_at	CMKOR1	Chemokine orphan receptor 1	4.27333	4.36333	4.55	4.46	4.365	4.315	4.24667	4.3475	4.51	4.57667	4.37	4.38	4.45	4.49667	4.17333	4.25333	4.18	4.32333	4.25	4.09667	4.575	4.385	4.21667	4.36667	4.16	4.43	4.38667	4.10333	4.5	4.26667	4.34	4.25667	4.27667	4.22667	4.24333	4.27333	4.53333	4.62333	4.14	4.19333	4.36667	4.28	4.42	4.36	4.325	4.19333	4.52667
205099_s_at	CCR1	chemokine (C-C motif) receptor 1	5.29333	5.41	5.32	5.06	5.625	5.625	5.77667	5.5525	5.39667	5.52	6.38333	4.79	4.86	5.47667	5.45	5.03333	5.18667	5.56	5.46	5.71333	5.125	5.055	5.9	6	5.53	5.06	4.91333	5.30333	5.06	5.80333	4.74	6.64333	5.86333	6.04667	5.76	5.77	4.89333	6.18333	4.97	5.27667	4.92	5.87333	5.56	7.35	5.725	5.88667	5.67
222581_at	XPR1	xenotropic and polytropic retrovirus receptor	6.60667	6.82667	6.44333	6.4	6.45	6.765	6.76333	6.455	6.69333	6.68	6.8	6.8	6.35	6.55667	6.47333	6.41	6.65667	6.66	6.05	6.88333	6.8	7.04	6.74333	6.7	6.86	6.26	6.24333	6.33333	6.28	6.58333	6.19	6.37333	6.76	6.7	6.94667	6.85333	7.32	6.80667	7.15	7.06333	7.27667	6.93	7.36	7.16	6.95	6.93	6.91
204793_at	GPRASP1	G protein-coupled receptor associated sorting protein 1	8.56333	8.54333	8.51	6.87	7.925	7.785	7.75333	8.085	8.53667	7.69333	6.86	9.16	9.15	8.53667	9.08333	9.44667	8.93	8.02	8.27667	8.56	9.225	9.035	8.16333	7.87	9.01667	8.89	9.03	9.13667	8.96	8.83	8.92	7.62667	6.88667	7.87333	7.06333	7.16667	7.73333	6.72333	5.7	7.52	5.90667	6.99667	6.62	5.33	6.245	6.33333	5.74667
234692_at	BAI3	Brain-specific angiogenesis inhibitor 3	2.84333	2.91333	2.80667	2.71	3.055	2.86	2.77667	2.7675	2.83333	2.89	2.79	2.76	2.71	2.87	2.73	2.84	2.81667	2.97	2.74667	2.85667	3.1	2.925	2.74667	2.75333	2.83667	3.06	2.86	2.80667	3.08	2.8	2.69	2.76667	2.82667	2.71667	2.91667	2.84	2.81	2.87667	2.86	2.82667	2.74667	2.96	2.82	2.86	2.8	2.84667	2.72333
232267_at	GPR133	G protein-coupled receptor 133	3.62	3.27	3.63	4.31	3.73	3.755	3.68333	3.67	3.83	3.68667	4.01	3.34	3.675	3.38	3.61667	3.38667	3.40333	3.44667	3.95667	3.88	3.875	3.995	3.51	3.90667	3.47333	3.4	3.01	3.48667	3.49	3.82	3.48	3.90667	3.80333	3.74667	5.59667	5.04667	4.91667	5.56667	6.16	6.87667	5.39333	6.57667	5.5	6.67	4.585	6.17	4.99667
1553530_a_at	ITGB1	integrin, beta 1 (fibronectin receptor, beta polypeptide, antigen CD29 includes MDF2, MSK12)	5.71333	5.67667	5.04667	7.23	6.145	6.25	6.64	5.46	6.49	6.29	7.14	5.78	6.38	5.53667	6.47333	5.55	5.54	5.63667	6.18667	5.47333	5.825	5.91	7.12667	6.90667	6.53667	5.3	5.15667	6.36333	5.13	6.05667	6.86	7.24667	6.79333	7.19667	7.82	7.06333	9.92333	7.9	9.09	8.34	7.85333	8.78	7.97	9.07	8	7.71	9.48333
204463_s_at	EDNRA	endothelin receptor type A	3.23667	3.26333	3.57333	3.35	3.375	3.565	3.65	3.3475	3.49333	3.76667	3.95667	3.44	3.21	3.37	3.9	3.55667	3.28	3.34667	3.52667	3.4	3.305	3.47	3.71	3.75	3.71667	3.33	2.78667	3.65333	2.82	3.79333	3.16	3.76667	3.07	3.49667	5.86333	5.57667	5.66333	5.16333	5.7	7.64	6	7.44667	6.04	5.61	5.735	5.72	4.38667
204029_at	CELSR2	cadherin, EGF LAG seven-pass G-type receptor 2 (flamingo homolog, Drosophila)	7.93333	8.20333	8.32333	8.3	8.145	8.285	7.78667	8.3225	8.04	7.92667	8.42667	8.49	8.16	8.44667	9.1	8.74	8.19	8.76333	8.65	8.01667	8.165	8.25	8.17667	8.03	7.89667	6.99	7.52667	8.85	7.27	8.28	7.61	8.50333	8.36	7.88	7.40333	7.53333	5.82	6.29333	5.77	6.67667	5.97667	5.95333	5.48	5.25	6.685	6.16333	6.03
208568_at	MC2R	melanocortin 2 receptor (adrenocorticotropic hormone)	6.56	6.58	6.72	6.82	6.82	6.465	6.78667	6.5275	6.44667	6.75333	6.76667	6.37	6.425	6.67667	6.12333	6.44667	6.60333	6.47	6.26667	6.57333	6.47	7.26	6.39667	6.57333	6.41667	6.35	6.49667	6.14333	6.49	6.30333	6.47	6.40333	6.35333	6.42333	6.48333	6.26333	6.43667	6.74667	6.4	6.4	6.69333	6.43667	6.9	6.58	6.355	6.53333	6.64333
229768_at	OR51E1	olfactory receptor, family 51, subfamily E, member 1	4.81	4.86	4.85667	5.24	4.885	4.72	5.24667	4.885	4.51667	4.70667	5.00333	4.37	4.845	5.04	4.47	4.53	5.10667	4.83667	4.61	4.82	4.925	4.88	4.84667	5.24333	4.96667	4.76	4.9	4.66667	4.91	4.84	4.78	4.79667	4.95333	4.87333	4.91333	4.77333	4.75333	6.15333	5.27	5.15667	6.2	4.88667	5.31	4.98	4.805	5.69667	5.44
208059_at	CCR8	chemokine (C-C motif) receptor 8	5.16	5.27	4.99333	5.34	4.76	4.81	5.13	5.24	4.91333	4.99	5.34	5.38	5.005	5.34667	4.88667	4.94667	5.46	5.15	4.89333	5.14667	4.945	4.97	5.06	5.29667	5.14	5.52	5.23667	4.83	5.54	5.00333	5.12	4.98667	5.06667	5.15333	5.02	5.05333	5.11333	5.54667	4.94	5.3	5.35667	5.17333	5.32	5.11	4.905	5.09333	5.12333
1553061_at	OR6W1P	olfactory receptor, family 6, subfamily W, member 1 pseudogene	4.59333	4.51333	4.66	4.45	4.57	4.72	4.45	4.4075	4.87	4.77	4.52667	4.27	4.555	4.3	4.16	4.16	4.35667	4.24667	4.29667	4.27333	4.59	4.855	4.16333	4.35667	4.31	4.43	4.46333	4.11667	4.38	4.09	4.3	4.41333	4.27	4.25667	4.02	4.22667	4.39667	4.39	4.71	4.43	4.84333	4.23	4.41	4.26	4.335	4.32667	4.99
244493_at	GPR22	G protein-coupled receptor 22	2.77	3.15667	2.63333	2.52	2.485	2.48	2.61	2.6225	2.75667	2.61333	2.53333	4.41	4.1	2.63333	2.93667	3.41667	3.23	2.94333	2.66333	2.58667	2.72	2.705	2.56	2.53	2.64667	2.74	2.74667	3.28667	2.59	2.61333	2.71	2.52667	2.62	2.64	2.52333	2.41333	2.37333	2.52333	3.41	3.29	3.00667	2.46667	2.64	2.48	2.395	2.63	2.50667
1553553_at	TAS2R39	taste receptor, type 2, member 39	4.4	4.76	4.12667	4.37	4.67	4.335	4.92	4.5575	4.04667	4.15667	4.64667	4.28	4.73	4.48667	4.39667	4.36	4.80333	4.88667	4.50333	4.65667	4.385	4.22	4.81667	4.98667	4.79667	4.55	4.58333	4.52333	4.84	4.46333	4.49	4.55333	4.6	4.68333	4.52333	4.64	4.55333	4.84	4.72	4.62667	4.57667	4.47333	4.82	4.3	4.47	4.68	4.69333
231349_at	GPR150	G protein-coupled receptor 150	4.82667	5.15	5.49333	5.04	4.905	5.36	4.82	5.2675	5.23667	4.75	4.9	5.35	4.92	5.18333	4.66667	4.76	4.63333	5.05667	4.80333	5.09	5.05	5.185	4.95	4.79667	4.80333	5	5.08333	4.73333	5.04	4.94333	4.88	4.72667	4.96667	4.82667	4.81333	5.03	5.29	5.13333	4.74	4.86333	5.09333	5.37333	5.58	5.15	5.285	4.92333	5.33
229944_at	OPRK1	opioid receptor, kappa 1	5.80333	5.46667	5.35667	2.75	3.655	3.41	3.53667	5.07	4.35333	3.66667	2.73333	5.01	4.625	3.66667	3.55	4.15667	4.43333	3.11333	4.46667	5.46333	5.865	4.45	3.37333	3.32667	4.26	3.08	3.53	3.90333	2.95	3.98333	5.73	2.73333	2.81	3.25667	5.27667	4.28333	2.83333	2.86	3.01	2.76	2.81	2.73	3.03	2.97	2.63	2.78333	2.86667
1567287_at	OR5K1	olfactory receptor, family 5, subfamily K, member 1	2.68	2.72	2.85333	2.37	2.615	2.635	2.57333	2.6525	2.72	2.72667	2.52333	2.6	2.415	2.63667	2.54333	2.53333	2.54333	2.52333	2.55333	2.63333	2.655	2.68	2.49667	2.61	2.52333	2.47	2.58333	2.49	2.67	2.53667	2.6	2.5	2.60667	2.57333	2.53333	2.47	2.58	2.60667	2.72	2.69667	2.54667	2.50667	2.64	2.67	2.56	2.60667	2.6
210597_x_at	PRB1 /// PRB2	proline-rich protein BstNI subfamily 1 /// proline-rich protein BstNI subfamily 2	7.60667	7.41667	7.98	7.5	7.975	8.155	7.62	7.505	7.64667	7.93667	7.60667	7.3	7.17	7.56333	6.81667	7.00333	7.45333	7.44	6.90333	7.48	8.16	7.97	7.31667	7.25667	7.13	7.82	7.11	6.88667	7.71	7.15	7.35	7.24333	7.16667	6.97667	7.05333	7.09	7.06	7.31	7.92	7.55667	8.01	7.48333	8.05	7.38	7.4	7.4	7.71667
1564339_a_at	CHRM3	cholinergic receptor, muscarinic 3	5.84667	5.99333	5.81667	5.27	4.81	5.41	5.26667	5.8775	5.41	5.04333	5.22333	6.82	7.085	5.85667	6.46	6.46667	6.68	5.78667	5.84	5.48	6	5.7	5.24667	5.43667	5.66667	5.42	5.20333	6.55333	5.46	5.32667	5.93	5.33667	5.27333	5.50667	5.22667	5.24	5.47333	5.36	5.43	5.35333	5.39333	5.2	5.4	5.33	5.1	5.31	5.52333
221149_at	GPR77	G protein-coupled receptor 77	4.13333	3.99	3.98	4.1	3.855	3.795	4.04	4.09	3.87	3.6	3.91667	3.85	4.035	4.20333	3.84	3.98	3.82667	4.18	3.86	4.19667	3.905	3.855	3.99	3.93333	3.95667	4.12	3.95333	3.71333	4.02	4.07667	3.89	3.79333	4.07	3.90333	3.78	3.89333	3.93333	4.06333	4.03	3.93333	3.89333	3.99	4.1	4.37	4.02	3.80667	4.12333
229105_at	GPR39	G protein-coupled receptor 39	3.91	4.11	3.53	3.65	3.71	3.78	3.90333	3.875	3.88	4.12	3.73667	3.79	3.55	3.8	3.43	3.54333	3.64333	3.86	3.87667	3.72667	3.555	3.63	3.68667	3.68333	3.83667	3.83	3.59667	3.47333	3.86	3.82333	3.86	3.57333	3.78	3.86667	3.54	3.48667	3.65333	3.86667	3.82	3.69333	3.71333	3.66333	4.39	3.68	3.6	3.61	3.96667
203631_s_at	GPRC5B	G protein-coupled receptor, family C, group 5, member B	7.26667	6.63667	6.94	8.22	7.225	7.33	7.28	6.81	7.00333	6.93	7.60333	7.28	7.655	6.7	7.41333	7.18333	7.02667	6.90667	7.23667	6.32	6.87	7.075	7.41333	7.18333	6.99667	5.82	6.50333	7.23667	6.84	6.52	7.53	7.70667	8.13333	7.32	5.09667	5.14333	5.17667	5.37667	6.24	5.71667	6.20333	5.09	5.92	5.47	5.78	5.47667	5.89
217425_at	MC2R	Melanocortin 2 receptor (adrenocorticotropic hormone)	3.98333	4.05667	4.09	4.17	4.125	4.19	4.31333	4.1325	3.99	3.96	4.08	4.13	4.17	4.32	3.70333	3.90333	4.01	4.18333	3.98333	4.09	4.05	4.225	3.97333	4.33333	4.03667	3.9	4.03	3.72667	4.09	3.84667	4.01	3.95	4.25333	4.01	3.93	3.89	4.23	4.22333	4.18	4.11333	4.28	4.01333	4.3	3.88	3.96	3.95667	4.16333
224392_s_at	OPN3	opsin 3 (encephalopsin, panopsin) /// opsin 3 (encephalopsin, panopsin)	4.37	4.14	4.28667	4.13	4.175	4.255	4.29667	4.3475	4.67667	4.62	3.90667	6.85	6.095	5.15	5.61667	6.55333	5.31333	4.00333	4.40667	6.63667	7.015	5.25	3.98	3.89333	3.99667	3.87	3.83333	5.56333	3.95	3.98	3.85	4.08333	4.08667	3.88333	4.46333	4.29333	3.99	4.29667	4.21	4.35	4.34	4.08333	4.05	4.3	4.165	4.15667	3.97667
1553401_at	MRGPRX1	MAS-related GPR, member X1	3.29	3.24333	3.08	3.14	3.04	3.165	3.25333	3.2675	2.98	3.19	3.25667	3.18	3.235	3.34667	3.06	3.05	3.34	3.19667	3.04667	3.18	3.01	3.155	3.19667	3.23667	3.3	3.29	3.24	3.19333	3.27	3.15667	3.14	3.12	3.27333	3.16333	3.67333	3.37667	3.20667	3.24333	3.16	3.16	3.31667	3.33667	3.18	3.41	3.34	3.15333	3.26333
237390_at	ADRA1A	Adrenergic, alpha-1A-, receptor	3.86	4.26	3.7	4.32	4.085	3.715	4.43	3.8025	4.08	4.08	4.34667	4.72	4.1	4.03	4.67	4.73	4.58667	5.58667	4.37333	4.14333	3.72	3.71	4.14667	4	4.53333	3.88	4.12667	4.6	3.95	4.3	3.44	4.38333	4.47333	4.92333	3.34	3.23667	3.76667	3.94333	5.13	3.25	4.69	3.44667	3.53	3.64	4.015	4.79333	5.56667
240804_at	GPR39	G protein-coupled receptor 39	5.57333	5.70667	4.7	5.5	5.14	5.085	5.80333	5.57	4.73	4.71667	5.35	5.36	5.195	5.51333	4.84667	4.84333	5.79667	5.90667	5.05333	5.63	5.23	4.86	5.31	5.5	5.48667	5.02	5.49333	5.03667	5.42	5.24333	5.05	5.1	5.62	5.19	5.14	5.07	4.79667	5.34333	5.5	5.44333	5.76	5.21333	5.08	5.19	4.935	5.48	5.18
207825_s_at	GHRHR	growth hormone releasing hormone receptor	4.75667	4.77667	5.03667	5.19	4.705	4.955	4.87333	4.9825	4.52	4.6	4.83667	4.78	5.065	4.95	4.66667	4.78667	4.80333	4.83667	4.75333	4.81667	4.795	5.02	4.73667	4.96333	4.77667	5.1	5.04667	4.85667	5.08	4.84333	4.71	4.93333	4.79	4.91333	4.9	5.01667	5.07	5.37	4.93	4.86333	5.05667	5.11333	5.67	4.79	4.935	5.1	5.36333
205579_at	HRH1	histamine receptor H1	3.96667	4.82333	3.63	4.07	3.27	3.875	4.21	4.0225	3.41	3.64667	4.11	4.81	4.945	4.62333	4.31667	4.5	5.09667	4.34667	4.00667	4.05667	3.44	3.645	4.06333	4.26	3.89333	4.09	3.89333	4.87	4.2	3.89333	3.77	3.73667	3.89	4.00667	6.22667	5.42333	6.91	5.38333	4.15	3.90333	4.07	5.63667	5.71	5.87	4.795	4.81333	4.61
1553507_a_at	GPR6	G protein-coupled receptor 6	6.34667	4.87667	5.72333	4.46	5.33	4.83	4.87333	6.3525	4.76333	4.67333	4.92333	5.06	5.32	4.99	4.85	5.05333	5.1	4.85	4.88333	4.75	4.725	4.665	4.7	4.92333	4.82333	4.9	4.82333	4.72333	5.09	4.78333	4.6	4.88667	4.76	4.91667	5.11	4.86333	5.37333	5.45333	5.39	4.80667	5.13	4.92	5.39	5.07	5.325	5.28667	5.54667
1553319_at	OXGR1	oxoglutarate (alpha-ketoglutarate) receptor 1	3.6	4.05333	3.81333	3.86	3.94	3.71	3.99333	3.705	3.55667	3.65	3.94667	3.85	3.975	3.75667	3.52667	3.87333	3.83667	3.68667	3.76667	3.87333	4.11	3.535	3.69	3.98333	3.89667	3.82	3.62	3.55333	3.82	3.76	3.88	3.85	3.68	4.03	3.80333	3.66333	3.72333	4.04	3.88	3.77	3.99333	3.79667	3.83	3.65	3.825	3.81333	4.19
224285_at	GPR174	G protein-coupled receptor 174	3.23667	3.27667	3.23667	3.23	3.26	3.115	3.41333	3.375	3.48333	3.28667	3.21	3.24	3.21	3.29333	3.07	3.09667	3.26667	3.22333	3.06	3.24333	3.61	3.235	3.15	3.20667	3.36	3.67	3.12667	3.1	3.39	3.19333	3.22	3.18333	3.28	3.05333	3.03333	3.06667	3.26	3.26333	3.7	3.08	3.5	3.18333	3.15	3.16	3.08	3.26	3.23
1569642_at	F2R	coagulation factor II (thrombin) receptor	5.79	6.04	6.07333	6.17	6.105	6.045	6.4	6.0625	6.17	6.08	6.35333	5.97	6.115	6.07333	5.88667	6.08667	6.14	6.02333	6.02333	6.09	6.08	6.135	6.00667	6.06333	6.03	6.13	5.99667	5.83	6.24	6.04333	6.13	5.99	6.17	6.14333	6.03667	6.03	6.36	6.60667	6.35	6.10333	6.24	6.26667	6.53	6.03	6.09	6.27	6.40333
214586_at	GPR37	G protein-coupled receptor 37 (endothelin receptor type B-like)	4.63667	4.36333	4.65333	7.25	6.5	6.685	5.89	4.6925	5.91	5.90667	6.71667	4.96	5.82	4.88	5.66333	4.78	4.37667	5.59667	5.92667	5.02333	4.745	5.51	6.05667	5.98667	5.53333	2.96	3.82333	5.52	3.14	5.51	5.62	6.61	6.31667	6.06	2.87333	2.93667	2.72667	2.74333	2.84	2.86	3.00333	2.87	2.7	2.98	2.885	2.76333	2.69667
221458_at	HTR1F	5-hydroxytryptamine (serotonin) receptor 1F	4.54667	4.73667	4.26	4.5	4.82	4.52	4.94	4.4475	4.4	4.43	4.54	4.47	4.74	4.37667	4.60667	4.33	4.52667	4.41333	4.14	4.52667	4.69	4.58	4.75	4.80333	4.78333	4.33	4.34667	4.43667	4.25	4.37	4.43	4.4	4.64667	4.68667	4.36667	4.42333	4.33	4.36667	5	4.52667	4.70667	4.82	4.54	4.28	4.435	4.60333	4.33333
1553544_at	GPR101	G protein-coupled receptor 101	5.34	4.98667	5.08333	5.02	4.98	5.005	5.27333	5.235	5.14333	5.18667	5.06	4.96	5.185	4.99	4.77	4.72667	5.15333	5.25667	4.79333	5.13333	5.335	5.095	4.95	5.31667	5.12667	5.17	5.14667	4.81333	5.41	4.98667	4.71	5.00667	4.79333	5.16333	4.89333	5.01	5.12333	5.24	5.77	5.49667	5.68333	5.01	5.39	4.87	4.915	5.13667	5.33667
208285_at	OR7A5	olfactory receptor, family 7, subfamily A, member 5	5.81	5.71333	5.44667	7.4	5.58	5.6	6.26667	5.5075	5.51667	5.68667	6.02	6.16	5.57	5.68667	5.40667	5.28667	6.00333	6.15	5.61667	5.93667	5.665	5.665	5.9	5.99	6.08	5.6	5.54667	5.48667	5.55	5.69	5.36	6.14667	5.92333	5.61333	5.89333	5.83333	5.24333	5.77667	5.94	5.68333	5.85667	5.63333	6.03	5.32	5.675	5.61333	5.56
218589_at	P2RY5	purinergic receptor P2Y, G-protein coupled, 5	6.07667	6.17333	5.88667	5.73	5.9	5.95	7.10333	5.7925	5.91667	6.50667	7.59667	5.48	5.59	6.11333	6.23333	5.54667	5.85333	6.38333	6.36667	6.47333	5.71	5.915	7.46333	6.89333	7.17333	5.21	5.20333	6.14	5.11	7.30333	6.05	7.82	7.31667	7.46333	7.91	8.32333	7.06333	6.91667	6.91	7.32	7.54333	7.37	7.08	8.28	8.665	8.11667	8.16
1565949_x_at	CHML	Choroideremia-like (Rab escort protein 2)	3.47	3.46333	3.67667	3.11	3.43	3.5	3.62	3.36	3.56667	3.38667	3.58333	3.45	3.79	3.44667	3.48333	3.62	3.59	3.49667	3.51333	3.66	3.715	3.935	3.46	3.65667	3.4	3.69	3.56333	3.41667	3.37	3.34	3.65	3.51667	3.47	3.35	3.48667	3.53667	3.57333	3.69667	3.47	3.40333	3.48333	3.41333	3.4	3.37	3.58	3.54333	3.54
221467_at	MC4R	melanocortin 4 receptor	4.78	4.43333	5.16	4.82	4.49	4.805	4.77667	4.7725	4.84	4.74333	4.58333	5.05	4.84	4.70667	4.45333	4.66667	4.84333	4.65667	4.72	4.43667	4.785	4.74	4.43	4.61	4.62	4.79	4.56	4.53667	4.53	4.45	4.37	4.38	4.34667	4.85333	4.59667	4.44333	4.40333	4.87	4.77	4.64667	4.75667	4.40667	4.35	4.34	4.345	4.68333	4.61667
207652_s_at	CMKLR1	chemokine-like receptor 1	4.52667	4.81333	4.6	4.42	4.505	4.555	4.70333	4.73	4.91	4.36667	4.57333	4.25	4.3	4.43667	4.17	4.24667	4.46667	4.47333	4.19333	4.44667	4.29	5.17	4.55	4.55667	4.53	4.39	4.53333	4.26667	4.58	4.65333	4.34	4.52	4.55333	4.77667	4.34333	4.7	4.42333	5.17	5.07	4.6	4.90333	5.12	5.26	4.82	4.3	4.62333	5.05667
204137_at	GPR137B	G protein-coupled receptor 137B	7.60667	7.12	7.64333	7.04	7.42	7.33	7.31667	7.1975	7.03667	7.16333	7.66667	6.53	6.15	6.43667	7.05667	6.64333	6.72333	6.98	6.7	6.43	6.285	6.42	7.23	7.31667	7.04667	5.78	6.18	7.25	5.4	7.04333	6.6	7.42333	7.18333	8.02667	8.35667	8.65	5.67667	5.18667	6.88	6.46	5.58667	4.98667	5.3	6.17	6.19	5.37	5.28333
231745_at	GPR55	G protein-coupled receptor 55	4.68	4.51	4.65667	4.93	4.975	4.87	4.73333	4.615	4.76333	4.40667	4.57333	4.74	5.005	4.73667	4.32	4.4	4.77333	4.68333	4.36333	4.74333	4.92	4.79	4.38333	4.61667	4.75667	5.33	4.61667	4.36667	5.24	4.71333	4.86	4.56	4.60667	4.60667	4.52333	4.60667	4.73	4.82	4.97	4.48333	4.69	4.80667	5.22	4.86	4.52	4.77333	4.8
221402_at	OR1F1	olfactory receptor, family 1, subfamily F, member 1	6.52333	6.59333	6.43	6.65	6.205	6.175	6.53333	6.63	6.24333	6.28	6.34667	6.59	6.31	6.50667	6.19333	6.23333	6.47333	6.42	6.37	6.30333	6.395	6.195	6.30333	6.46667	6.52667	6.8	6.59667	6.21333	6.8	6.32333	6.55	6.35	6.52333	6.38333	6.33667	6.22667	6.60333	6.69667	6.4	6.36667	6.41667	6.51333	6.87	6.56	6.485	6.61	6.89333
218326_s_at	LGR4	leucine-rich repeat-containing G protein-coupled receptor 4	4.34333	4.17	4.31	4.65	4.46	4.28	4.56	4.135	4.8	4.58667	5.02	4.47	3.8	3.76667	4.19667	4.12333	4.45	4.48667	4.32	4.25333	4.05	4.145	4.74667	4.41	4.50333	4.25	5.24667	4.59	4.15	4.74	4.31	4.86667	4.46667	5.25333	5.38	5.26333	5.28667	4.77667	5.16	5.42	4.50667	4.45667	4.39	3.95	5.265	5.16	4.78667
222155_s_at	GPR172A	G protein-coupled receptor 172A	5.39667	5.82333	4.95333	5.72	5.055	5.11	5.42333	5.54	5.11	5.07333	5.70667	5.58	5.345	5.51667	5.42	5.65	5.54	5.64667	5.71667	5.55	5.605	4.315	5.34667	5.58333	5.25	5.82	6.37	5.38667	6.52	5.67	5.49	5.62	5.50333	5.62	6.15667	5.98667	5.68	6.13	5.57	5.28667	5.35	5.66333	5.79	6.07	6.615	6.20667	6.69333
226966_at	PRPF40B	PRP40 pre-mRNA processing factor 40 homolog B (S. cerevisiae)	6.04333	6.11333	6.03333	6.19	5.935	6.2	6.01667	6.0225	6.08	6.21	6.29667	6.08	5.92	6.37333	6.33333	6.35	6.21	6.13667	6.49	5.90333	6.285	6.11	6.04	5.90667	6.14333	6.01	6.2	6.22	6.14	6.17667	6.03	6.15	6.34667	6.03667	5.97	6.06333	6.75667	6.37	5.83	6.01667	6.04333	6.21333	6.04	5.97	5.695	5.97667	5.97333
211568_at	BAI3	brain-specific angiogenesis inhibitor 3	3.18667	3.20333	3.92667	2.82	3.03	2.83	2.90333	3.1775	3.34333	3.18333	2.82333	3.36	2.91	3.21	4.02	3.12333	3.28333	3.35	3.01333	3.27333	3.515	3.355	3.22333	2.98	3.29	3.29	3.47	3.99667	2.74	2.98	3.01	3.03667	3.00667	2.82667	3.07667	3.32333	2.77667	2.65667	2.56	2.7	2.72	2.75333	2.81	2.7	2.66	2.75	2.67333
210831_s_at	PTGER3	prostaglandin E receptor 3 (subtype EP3)	4.78667	5.01333	4.65333	5.3	4.79	4.9	4.95	4.895	4.63333	4.53333	4.88667	4.97	5	4.84333	4.56	4.75	4.78667	4.88667	4.68	5.02333	4.87	4.64	4.73333	4.70333	4.86	5.3	4.51333	4.73667	5.1	4.91	4.78	4.78333	4.68333	4.62	4.63333	4.76667	6.10333	5.47	5.52	5	5.15333	5.41333	5.31	5.72	5.78	6.73	6.88667
210956_at	PPYR1	pancreatic polypeptide receptor 1	4.11333	4.12	4.39333	4.31	4.415	4.55	4.02	4.36	4.45667	4.56333	4.14667	4.26	4.265	4.21333	4.07	4.15333	4.09	3.93667	4.12667	4.06	4.345	4.275	4.06	4.04	4.02667	4.41	4.24667	4.01333	4.33	4.03	4.3	4.05	4.15667	4.13	4.00333	4.04667	4.43667	4.44	4.01	4.16667	4.27333	4.47333	4.31	4.12	4.315	4.3	4.29
1552818_a_at	BRS3	bombesin-like receptor 3	3.44667	3.55667	3.65333	3.16	3.77	3.985	3.52333	3.4475	3.46667	3.33667	3.45667	3.25	3.37	3.42667	3.13	3.29333	3.58	3.5	3.23333	3.54333	3.405	3.21	3.19667	3.55	3.49333	3.12	3.31333	3.07667	3.7	3.37	3.33	3.3	3.38	3.31667	3.16	3.21667	3.15333	3.66333	3.84	3.61333	3.84333	3.41667	3.76	3.18	3.385	3.34	3.4
206953_s_at	LPHN2	latrophilin 2	5.86	5.99333	5.92333	5.17	6.045	5.21	5.18	5.8575	5.96333	5.65333	4.74667	6.96	6.615	6.04	6.73	7.34	6.79	5.66	5.22333	5.39	5.86	6.01	5.23333	5.17333	5.67	5.03	4.59667	6.8	4.83	5.76333	5.34	5.25667	4.73667	5.19667	6.6	6.36	7.58	6.28333	7.43	7.62333	6.91667	6.56333	5.97	6.9	7.24	7.28333	7.28333
231747_at	CYSLTR1	cysteinyl leukotriene receptor 1	3.91333	4.3	4.08	4.09	4.12	4.225	4.7	4.0975	3.73333	4.21667	4.50333	3.89	4.045	4.23333	3.97667	3.84333	4.08333	4.28333	4.18667	4.4	3.585	4.055	4.57	4.92	4.54	3.74	3.75667	4.10667	4.1	4.57667	3.97	4.73333	4.42667	4.46333	4.48333	5.52667	4.27333	5.3	3.98	4.3	4.01	5.58333	5.22	4.85	5.29	5.22333	5.26333
1553889_at	MRGPRX2	MAS-related GPR, member X2	4.95667	5.27667	5.28667	5.51	5.59	5.485	5.41667	5.2325	5.36667	4.99667	5.37333	5.2	5.39	5.23	5.13333	5.39333	5.28667	5.37333	5.34667	5.17667	5.6	5.7	5.20333	5.32333	5.21333	5.45	5.34667	5.21667	5.46	5.12333	5.24	5.40333	5.40333	5.4	5.34	5.14667	5.39333	5.52333	5.26	5.21667	5.36667	5.45333	5.37	5.01	5.475	5.32	5.58667
206991_s_at	CCR5 /// LOC653725	chemokine (C-C motif) receptor 5 /// similar to C-C chemokine receptor type 5 (C-C CKR-5) (CC-CKR-5) (CCR-5) (CCR5) (HIV-1 fusion coreceptor) (CHEMR13) (CD195 antigen)	7.13667	7.51333	6.92	7.37	7.29	7.14	7.36	7.405	6.68333	6.89	7.48667	7.39	7.005	7.44	7.07	6.92	7.25333	7.32	7.01	7.16333	7.11	6.835	7.41	7.58333	7.31333	7.16	7.13333	6.98	7.48	7.39667	7.28	7.39333	7.47667	7.39	7.64	7.64667	7.15	7.51	7.32	7.49333	7.56	7.46	7.28	7.65	7.975	7.58	7.40333
205898_at	CX3CR1	chemokine (C-X3-C motif) receptor 1	8.49333	8.71667	6.93	6.58	7.105	7.955	10.1267	7.84	7.20333	7.53	10.4067	5.62	6.715	8.48333	8.65333	8.19	8.62333	8.63333	9.50333	8.69	6.56	7.14	9.86333	10.06	9.64333	4.95	7.30667	8.78	5.08	9.66667	7.9	10.3467	9.96333	9.71667	8.96667	8.73333	4.95	5.11333	4.72	4.86	4.99333	6.21667	5.77	4.22	5.14	5.11667	5.26667
1559714_at	RGR	retinal G protein coupled receptor	5.03333	5.16	4.61667	5.27	4.915	4.9	5.10667	5.205	4.65667	4.59667	5.10667	5.17	5.135	5.02333	5.02	4.84	5.09667	4.87	4.87333	5.24667	4.625	4.66	5.19	5.13333	4.89667	5.42	5.23333	4.84667	5.07	5.06333	4.93	4.99	5.26	5.09	5.10333	4.99	5.05667	5.39333	5.41	5.29333	5.70333	5.34	5.44	5.41	5.08	5.25	5.21
221345_at	FFAR2	free fatty acid receptor 2	3.50333	3.67667	4.01	3.84	3.525	4.01	3.77667	3.6825	3.89333	3.84333	3.80667	3.61	3.725	3.79333	3.29667	3.69	3.59667	3.52333	3.62667	3.44667	4.045	4.32	3.63667	3.64	3.66333	3.92	3.65667	3.44667	3.6	3.68	3.64	3.66333	3.74	3.65333	3.58333	3.68333	4.06	4.13667	3.84	3.46667	3.78	3.51333	4.52	3.9	3.775	4.11333	4.39667
215443_at	TSHR	thyroid stimulating hormone receptor	3.37	3.06667	3.45667	3.55	3.425	3.075	3.08333	3.5975	3.08333	3.27	3.19667	3.33	3.23	3.12333	3.06	3.02333	3.15333	3.24333	3.11333	3.26	3.23	3.255	3.04	3.05667	3.03667	3.14	3.1	2.96667	3.41	3.06667	2.93	3.06333	3.34	3.25	2.96667	3.00667	3.21667	3.33333	2.99	2.98	3.01	3.14667	3.54	3.11	3.185	3.32	3.31667
205118_at	FPR1	formyl peptide receptor 1 /// formyl peptide receptor 1	4.34	4.24	4.23333	4.08	4.13	4.07	4.25667	4.37	4.15	4.17	4.29667	4.26	4.275	4.28	4.14667	4.27667	4.24	4.27667	4.23	4.19667	4.005	4.23	4.19667	4.20333	4.11667	4.46	4.42	4.16	4.11	4.11333	4.26	4.17333	4.26	4.24667	4.22333	4.20667	4.30333	4.21333	4.29	4.08333	4.36667	4.2	4.26	4.29	4.135	4.21	4.43
225463_x_at	GPR89A /// LOC653519	G protein-coupled receptor 89A /// similar to G protein-coupled receptor 89	6.75667	6.89	6.31	6.59	6.505	6.615	6.97	6.6175	7.29	6.87667	7.07333	7.02	6.755	6.88667	7.22667	7.05	6.84	6.97	7.06	7.40667	7.11	6.86	7.18667	6.91667	7.4	7.18	7.48	7.14667	7.69	7.36667	7.72	7.29	7.03	7.29333	7.66667	7.37333	6.51667	6.78667	6.53	7.00667	6.46667	6.87333	6.48	6.84	7.5	7.01333	7.00667
231192_at	EDG7	Endothelial differentiation, lysophosphatidic acid G-protein-coupled receptor, 7	3.08333	3.29	3.24667	3.09	3.305	3.03	2.95667	3.1675	3.22	2.97	2.91667	3.47	3.44	3.33333	3.23667	3.73	3.49333	3.80667	2.98	3.63333	3.35	3.365	3.04333	3.04	3.45333	3.2	3.13667	3.51333	3.11	3.71333	3.06	3.13667	3.77667	2.96667	6.51333	5.82333	3.04333	3.23333	5.51	5.72	4.30333	2.98333	3.55	2.98	3.51	3.03667	3.04
214559_at	DRD3	dopamine receptor D3	3.76333	3.65	3.63333	3.84	3.535	3.69	3.30667	3.785	3.65667	3.80667	3.53	3.84	3.6	3.58	3.36333	3.47	3.51	3.41667	3.38	3.53333	3.58	3.715	3.52333	3.46667	3.42667	3.87	3.49667	3.41	3.64	3.61	4.07	3.52333	3.43333	3.36667	3.33333	3.43667	3.73	3.57667	3.63	3.54667	3.61667	3.51	3.74	3.58	3.64	3.50667	3.8
1567068_at	OR4D1	olfactory receptor, family 4, subfamily D, member 1	3.73333	4.2	4.45	4.12	4.665	4.965	4.13333	4.2825	4.46333	4.85	3.92333	4.28	3.95	4.04667	3.72	3.87667	4.06	4.07667	3.94333	4.14	4.95	4.9	3.88333	3.96667	3.98667	4.15	3.87	3.89333	4.56	3.92	3.95	3.98333	4.09667	3.76	3.63333	3.71	3.85333	3.93	4.5	4.05667	4.22333	3.82	4.41	3.39	3.755	3.75	3.75
1561195_at	GPR137B	G protein-coupled receptor 137B	5.12333	5.07667	5.43667	4.72	4.86	4.965	4.99333	5.08	5.04667	5.07	5.14333	4.46	4.535	5.08333	5.75333	5.28333	5.45333	5.57333	4.95333	5.56	5.355	5.055	5.04667	5.56667	5.19333	5.18	6.25667	5.53333	5.2	5.17667	4.42	5.1	5.24	5.81	4.69333	4.60333	5.70333	5.47	4.7	5.27333	5.35667	5.16	4.31	4.41	5.71	5.87333	5.02667
206673_at	GPR176	G protein-coupled receptor 176	4.46667	4.19	4.28333	4.3	4.105	4.755	4.08667	4.34	4.81333	4.43333	4.11	4.54	4.77	4.23333	4.24667	4.49	4.49333	4.16667	4.11	3.97	4.605	4.745	4.16667	4.19	4.38667	4.63	4.45333	4.21333	5.14	4.13667	4.74	4.05	3.86	4.09333	3.83	3.93	4.99	4.47	4.27	4.03667	4.27	4.39667	4.95	4.16	4.405	4.21	4.80333
207886_s_at	CALCR	calcitonin receptor	3.18333	3.24667	3.30667	3.18	3.44	3.29	3.33	3.1725	3.35333	3.29	3.26333	3.2	3.165	3.19	3.01333	3.03667	3.06	3.27667	3.34333	3.17333	3.455	3.315	3.25667	3.1	3.19333	2.97	3.10667	3.01667	3.15	3.18333	3.24	3.09333	3.22667	3.09333	3.04	3.14333	3.14	3.13333	3.17	3.13667	3.22	3.31667	3.21	3.25	3.08	3.19	3.15333
240886_at	CASR	Calcium-sensing receptor (hypocalciuric hypercalcemia 1, severe neonatal hyperparathyroidism)	6.13333	6.26333	6.06	6.4	5.755	5.92	5.87667	6.3025	6.33333	5.78333	5.76667	6.26	5.725	6.19667	5.84333	5.95333	5.87333	5.96333	5.87	5.90333	5.66	6.375	5.90667	5.83333	5.89333	6.23	5.9	5.97333	6.84	5.89667	6.33	5.83	5.85333	5.58333	5.62333	5.69333	5.99667	5.92333	6.58	5.96667	6.2	6.12667	6.82	6.25	6.085	5.85	6.04667
1553556_at	TAS2R40	taste receptor, type 2, member 40	3.10333	2.99667	2.99	3.05	2.96	3.035	3.16	3.0275	3.06667	2.85	3.06333	2.99	3.205	3.06667	2.89667	2.94	3.07333	2.96	2.90667	3.08333	3.08	3.075	2.93333	3.05667	2.87667	3.05	3.03333	3.00333	3.24	2.98333	2.93	2.98667	2.95667	3.06	3.10333	3.00333	3.20667	3.51333	3.17	3.15	3.07	3.09333	3.15	3.05	2.925	3.11667	3.24667
241881_at	OR2W3	olfactory receptor, family 2, subfamily W, member 3	4.37667	4.28333	4.07333	4.13	3.87	4.22	4.30333	4.11	4.52667	4.23667	3.99333	4.42	4.21	4.05333	3.78	4.14	4.29667	4.27667	3.96	4.09	4.05	4.52	4.23	3.97333	4.46	3.94	3.79667	4.19	4.39	4.37	4.69	3.72667	3.93	3.93	4.70333	4.64333	3.78667	3.85	4.43	3.94333	4.27667	4.05333	4.45	3.9	3.955	3.72667	4.20333
211173_at	CCKAR	cholecystokinin A receptor	6.5	6.07333	6.50667	6.29	6.375	6.605	6.31	6.2375	6.71333	6.59333	6.19333	5.78	6.23	6.03667	5.86	5.97667	6.12333	6.1	5.87333	6.22667	6.48	7.095	6.12333	6.12333	6.02	5.63	5.97333	5.90667	6.2	5.99	6.12	6.06667	5.98667	5.82333	6	5.77667	6.02667	6.1	7.07	6.12	6.41333	5.75667	6.44	5.69	5.85	5.84667	6.09
240631_at	MASS1	Monogenic, audiogenic seizure susceptibility 1 homolog (mouse)	3.09667	3.14	3.26333	3.35	3.23	3.23	3.22667	3.1125	3.21	3.11	3.10333	3.05	3.22	3.2	2.91667	2.96667	3.02333	3.10333	3.01667	3.22	3.28	3.21	2.99	3.09333	3.11	3.32	3.02667	2.94667	3.46	3.00333	3.07	3.03	3.08	3.04	2.96667	3.05667	2.88333	3.05333	3.23	3.07	3.20333	2.94333	3.25	3.06	3.16	3.22333	3.11667
216818_s_at	OR2J2	olfactory receptor, family 2, subfamily J, member 2	3.71	3.72	4.14667	4.01	3.725	4.11	3.70333	3.875	4.07667	3.91333	3.73667	4.01	3.885	3.94333	3.55	3.76667	3.74	3.82667	3.77333	3.63	3.815	3.915	3.52667	3.77333	3.71	4.05	3.87	3.65	3.65	3.83667	4.04	3.63333	3.75	3.76667	3.80333	3.74667	3.75	4.13	3.83	3.87	3.99333	3.9	3.91	3.74	3.8	3.82	3.77
231783_at	CHRM1	cholinergic receptor, muscarinic 1	6.52667	6.34333	6.17333	3.68	4.905	4.76	3.23333	6.68	3.84333	3.85333	3.62	6.3	6.095	6.23	6.24	6.68667	6.41	5.97333	3.45333	3.26333	3.59	3.67	3.41667	3.47667	3.33	3.42	3.38667	6.07333	3.6	3.42	3.56	3.33667	3.37	3.52333	3.29	3.57667	3.71333	3.65	3.2	3.28333	3.53	3.52667	3.63	3.57	3.445	3.31	3.75333
221288_at	GPR22	G protein-coupled receptor 22	4.44	4.31333	3.62667	3.92	3.95	3.685	3.86	4.0875	4.14	3.81667	3.66667	6.58	5.955	4.32	5.21	5.88	5.52	4.97667	3.72	4.13667	4.3	3.83	3.98667	3.80333	4.37333	5.9	5.00667	5.45	5.96	3.9	4.83	3.72	3.69333	3.66	3.72	3.49333	3.35	3.59667	6.25	5.97667	5.52667	3.40333	4.31	3.67	3.615	3.68	3.57333
209991_x_at	GABBR2	gamma-aminobutyric acid (GABA) B receptor, 2	5.80333	7.67333	5.79	5.37	6.475	6.61	6.16333	6.01	7.26	6.89	4.89	8.85	8.495	7.86	8.02333	8.87	8.54667	7.15667	7.12333	8.36	8.865	8.285	6.15	5.90667	6.64333	6.84	7.37	7.81	7.43	6.40333	7.81	5.62333	4.87667	5.81667	6.27	5.78	4.76333	4.93	5.54	5.06	5.5	4.71	4.77	5.06	4.435	4.94	4.78333
210729_at	NPY2R	neuropeptide Y receptor Y2	2.89	3.12333	2.65	2.67	2.92	3.505	3.18333	2.7275	2.59667	3.01	4.05333	2.87	2.835	2.81333	4.18	3.48333	3.00667	3.40667	3.63333	2.89	3.015	2.8	3.18667	3.65	2.89333	2.49	2.67667	4.13333	2.44	3.28667	2.46	3.66	4	3.16333	2.56667	2.53667	2.85333	2.78	2.61	2.57667	2.61333	2.50333	2.69	2.63	2.46	2.7	2.53667
1556987_s_at	OR2H1	olfactory receptor, family 2, subfamily H, member 1	5.47333	5.45667	5.19667	5.59	5.455	5.375	5.56667	5.2375	5.53333	5.42667	5.56	5.09	5.25	5.45333	4.98667	5.19667	5.48333	5.38333	5.23333	5.48333	5.44	5.64	5.38667	5.63	5.35	5.32	5.38333	4.92667	5.72	5.22667	5.26	5.31333	5.46	5.47	5.31	5.32333	5.03667	5.53667	5.46	5.50333	5.71333	5.34333	5.59	5.11	5.26	5.34	5.56
207307_at	HTR2C	5-hydroxytryptamine (serotonin) receptor 2C	9.22	5.64667	8.97333	5.11	6.82	6.665	5.22333	8.48	5.65	4.48667	3.02667	4.25	4.01	3.52	3.61333	4.06667	4.91333	4.85333	6.06333	3.89333	3.525	5.025	5.32667	4.84667	7.37333	5.89	2.89667	4.31	2.74	6.46667	3	3.18667	3.63333	6.37667	3.12667	2.85	2.81667	3	2.96	2.95	3.00333	2.94	2.97	3	2.76	3.02667	2.93333
202910_s_at	CD97	CD97 molecule	5.07333	4.97333	5.06	5.59	5.41	5.165	5.34333	5.095	5.06	5.37333	5.95667	5.42	5.545	5.72333	5.2	5.25	5.01667	5.27333	5.92667	5.18	5.195	5.575	5.42	5.67	5.05667	5.14	4.86	5.16333	5.14	5.58333	5.65	5.71	6.02667	5.35	5.66	5.96667	9.34	7.46667	6.07	6.06	5.62333	9.66333	7.83	7.37	6.885	6.51333	6.79333
208335_s_at	DARC	Duffy blood group, chemokine receptor	6.43333	6.83667	6.46	5.44	5.64	5.955	5.91667	6.695	5.96	5.91333	6.16667	6.37	5.905	6.44	5.92	6.50667	6.22667	6.12333	6.18667	5.94667	5.84	5.575	6.24667	6.71	5.89333	7.22	7.91	6.03667	7.52	6.36333	6.22	5.76667	5.87	7.26	8.11333	7.35	8.65333	10.2233	6.14	6.45	6.48	9.24333	10.47	9.77	8.465	9.37333	9.20333
206251_s_at	AVPR1A	arginine vasopressin receptor 1A	3.09667	3.12333	3.12	3.05	2.965	3.16	3.01333	2.965	2.94	3.11	2.96	3.02	3.155	3.08	2.93667	2.94667	3.13	3.05333	2.93333	2.99667	3.14	2.845	2.97667	3.01667	2.88667	2.94	3.05667	2.91667	3.04	2.87667	3.19	2.87667	2.92333	2.94333	2.94	2.99333	3.15667	3.22333	3	2.84333	3.13333	3.04667	3.47	3.09	3.06	3.17	3.23667
221391_at	TAS2R14	taste receptor, type 2, member 14	4.00333	4.00333	4.15333	3.87	4.22	4.21	4.14	3.8725	4.09333	4.26667	4.25333	3.9	4.115	4.06333	4.09333	4.25	4.06667	4.04667	4.11	4.01667	3.83	4.06	4.23667	4.15333	4.29667	4.13	4.21	4.17333	4.26	4.14333	4.1	4.18	4.43333	4.30333	3.93333	4.13667	3.80667	4.02333	4	3.72667	3.96333	3.93	3.93	3.96	3.875	3.86	3.8
206722_s_at	EDG4	endothelial differentiation, lysophosphatidic acid G-protein-coupled receptor, 4	5.24667	5.24	5.45667	5.19	5.435	5.27	5.29333	5.37	5.86	5.42667	5.49333	5.33	5.46	5.39333	5.22	5.39667	5.36	5.11667	5.45	5.19	5.365	5.75	5.22333	5.32	5.23333	5.4	5.58	5.05333	5.49	5.32	5.34	5.26667	5.52667	5.54667	5.36667	5.37	5.53	5.57667	4.98	4.96333	5.18	5.42667	5.48	5.58	5.655	5.40333	5.75
234226_at	OPN4	opsin 4 (melanopsin)	5.67	5.45667	5.87333	5.53	5.455	5.785	5.58667	5.9575	5.58333	5.4	5.81667	5.31	5.695	5.56333	5.32	5.53	5.67667	5.53	5.38	5.64667	5.76	5.555	5.35667	5.48	5.39	5.44	5.51667	5.35	5.79	5.35333	5.64	5.35667	5.55	5.56	5.46667	5.34333	5.87333	5.8	5.62	5.45	5.53667	5.51667	5.8	5.8	5.375	5.61333	5.85667
207792_at	OPRD1	opioid receptor, delta 1	5.13667	5.32	5.49667	5.41	5.69	5.37	5.05333	5.505	5.79667	5.41667	5.15667	5.21	5.44	5.52	5.21667	5.31333	5.21333	5.23667	5.09333	5.19333	5.53	5.46	5.15667	5.05	5.09667	5.99	5.11	5.12333	5.74	5.31333	5.33	5.07	5.30333	4.92333	4.88	4.96	5.27333	5.37333	5.24	4.97	5.26333	5.46333	5.71	5.68	5.28	5.11667	5.34
224337_s_at	FZD4	frizzled homolog 4 (Drosophila) /// frizzled homolog 4 (Drosophila)	5.10667	4.97333	5.23667	5.02	4.975	5.035	4.86667	5.285	5.16667	5.02	5.06	4.97	4.805	4.93333	4.53333	4.88333	4.90333	4.77333	4.68667	4.93	4.995	5.145	4.83333	4.77333	4.78	4.98	4.81667	4.64667	4.98	4.99667	4.78	4.80667	4.77	4.79	4.94333	4.96333	5.17667	5.44333	5.32	5.13	5.43667	5.11667	5.08	5.63	5.19	5.74667	5.39667
[truncated: 80 more columns]
